# Supplementary material
Source: HighWire-hosted journal article supplement (doi:10.1101/rna.033431.112)
Supplement: Schmidt_et_al._Supplementary_Table_1.docx [file Schmidt_et_al._Supplementary_Table_1.docx]

*Supplemental Table 1: Relative sensitivities of strains to various growth conditions.*

Condition Relative growth1 of strains2 with listed genotypes .

YPD WT *air1*-Δ *rrp6*-Δ *air2*-Δ *rrp6*-Δ *rrp6*-Δ *air1*-Δ *air2*-Δ

12° C ++++ ++++ ++++ ++++ ++++ ++++

25° C ++++ ++++ ++++ ++++ ++++ ++++

30° C ++++ ++++ ++++ ++++ ++++ ++++

37°C ++++ ++ ++ + ++++ ++++

YPD + WT *air1*-Δ *rrp6*-Δ *air2*-Δ *rrp6*-Δ *rrp6*-Δ *air1*-Δ *air2*-Δ

5-Fluorouracil, 200 μM ++++ ++ ++++ +++ ++++ ++++

Benomyl, 2.5 μg/ml ++++ ++++ ++++ ++++ ++++ ++++

Calcium Chloride, 100 mM ++++ ++++ ++++ ++++ ++++ ++++

Calcoflour White, 0.1% + - - - +++ +

Caffeine, 10 mM ++++ + - - ++++ ++++

Caspofungin, 70 ng/μl ++++ + + ++ ++++ ++++

Chloramphenicol, 5mg/ml ++++ ++++ ++++ ++++ ++++ ++++

Cordecypin, 20 μg/ml ++++ ++++ ++++ ++++ ++++ ++++

Cycloheximide, 1 μg/ml ++ + - + +++ +

Ethanol, 6% ++++ ++++ ++++ ++++ ++++ ++++

Formamide, 2% +++ + ++ +++ ++++ ++++

MMS, 0.025% ++++ ++++ ++++ ++++ ++++ ++++

Neomycin, 500 μg/ml ++++ +++ +++ +++ ++++ ++++

Sorbitol, 1M ++++ ++++ ++++ ++++ ++++ ++++

Thiolutin, 3 μg/ml ++++ ++++ ++++ ++++ ++++ ++++

Zinc acetate, 4.4 mM ++++ ++++ ++++ ++++ ++++ ++++

YP WT *air1*-Δ *rrp6*-Δ *air2*-Δ *rrp6*-Δ *rrp6*-Δ *air1*-Δ *air2*-Δ

Ethanol, 2% ++++ ++++ +++ ++++ ++++ ++++

Galactose, 2% ++++ ++++ ++++ ++++ ++++ ++++

Glycerol, 2% ++++ ++++ +++ ++++ ++++ ++++

Sucrose, 2% ++++ ++++ ++++ ++++ ++++ ++++

SCD + WT *air1*-Δ *rrp6*-Δ *air2*-Δ *rrp6*-Δ *rrp6*-Δ *air1*-Δ *air2*-Δ

5-Fluorouracil 200 μg/ml ++++ + +++ + ++++ ++++

BPS3, 0.1 mM ++++ ++++ ++++ ++++ ++++ ++++

Calcium Chloride, 100 mM ++++ ++++ ++++ ++++ ++++ ++++

Caffeine, 10mM ++++ +++ + +++ ++++ ++++

Copper Sulfate, 1.5 mM ++++ ++++ ++++ ++++ ++++4 ++++4

Copper Sulfate, 2 mM +++ ++ ++ + - -

Ferric Chloride, 3 mM ++++ + +++ + ++++ ++++

Ferrous Sulfate, 6 mM ++++ ++ ++ ++ ++++ ++++

Ferrozine, 750 μM ++++ ++++ ++++ ++++ ++++ ++++

SC WT *air1*-Δ *rrp6*-Δ *air2*-Δ *rrp6*-Δ *rrp6*-Δ *air1*-Δ *air2*-Δ

Ethanol, 2% ++++ ++++ +++ ++++ ++++ ++++

Glycerol, 2% ++++ ++++ +++ ++++ ++++ ++++

Galactose, 2% ++++ ++++ ++++ ++++ ++++ ++++

1 - (-)no growth; (+), least growth; (++++) most growth, as compared to growth on YPD at 30° C.

2 – Complete genotypes listed in Table S5. WT=YSB1002; *air1*-Δ *rrp6*-Δ=YSB1015; *air2*-Δ *rrp6*-Δ=YSB1016; *rrp6*-Δ=YSB1014; *air1*-Δ=YSB1012; *air2*-Δ=YSB1013

3 - # bathophenanthrolinedisulfonate

4 – brown color
