# Supplementary material
Source: HighWire-hosted journal article supplement (doi:10.1101/rna.033431.112)
Supplement: Schmidt_et_al._Supplementary_Table_3.xlsx [file Schmidt_et_al._Supplementary_Table_3.xlsx]

## Sheet: Sheet1
air1rrp6-rrp6	log2Conc	log2FC(rrp6/air1rrp6)	log2FC(air1rrp6/rrp6)	p.value	Type	air2rrp6-rrp6	log2Conc	log2FC(rrp6/air2rrp6)	log2FC(air2rrp6/rrp6)	p.value	Type		rrp6-wt	log2Conc	log2FC(wt/rrp6)	log2FC(rrp6/wt)	p.value			air2rrp6-rrp6	log2Conc	log2FC(rrp6/air2rrp6)	log2FC(air2rrp6/rrp6)	p.value	Type
snR37	-12.1193	1.31348	-1.31348	0.000366336	H/ACA	LSR1	-9.94993	1.16427	-1.16427	0.00156552	U2		LSR1	-10.4094	-1.62601	1.62601	0.00478301	U2		LSR1	-9.94993	1.16427	-1.16427	0.00156552	U2
snR39B	-15.2792	0.735459	-0.735459	0.0466178	C/D	snR10	-15.1394	1.7573	-1.7573	3.24245e-06	H/ACA		snR11	-12.5996	-2.16575	2.16575	0.00024311	H/ACA		snR13	-13.8488	0.769687	-0.769687	0.0363088	C/D
snR40	-11.9446	1.13923	-1.13923	0.00190521	C/D	snR13	-13.8488	0.769687	-0.769687	0.0363088	C/D		snR128	-11.4962	-2.52679	2.52679	2.53314e-05	C/D		snR14	-15.2811	0.817492	-0.817492	0.0278216	U4
snR47	-13.0938	0.829628	-0.829628	0.0233632	C/D	snR14	-15.2811	0.817492	-0.817492	0.0278216	U4		snR13	-14.8531	-2.33619	2.33619	0.000103113	C/D		snR17a	-11.7832	1.29754	-1.29754	0.000447969	U3 C/D
snR50	-15.282	0.901556	-0.901556	0.0155055	C/D	snR17a	-11.7832	1.29754	-1.29754	0.000447969	U3 C/D		snR14	-16.3593	-2.5246	2.5246	4.58635e-05	U4		snR19	-11.4802	0.963551	-0.963551	0.0086333	U1
snR51	-13.7101	0.762383	-0.762383	0.0370946	C/D	snR17b	-13.1715	0.913062	-0.913062	0.0129647	U3 C/D		snR161	-16.0327	-1.68532	1.68532	0.00454337	H/ACA		snR3	-14.5935	0.949736	-0.949736	0.0103243	H/ACA
snR53	-15.1562	2.30172	-2.30172	2.25227e-09	C/D	snR19	-11.4802	0.963551	-0.963551	0.0086333	U1		snR17a	-12.1302	-1.56647	1.56647	0.00654861	U3 C/D		snR34	-13.4807	1.03417	-1.03417	0.00500816	H/ACA
snR55	-14.8953	0.907561	-0.907561	0.0143026	C/D	snR190	-11.0801	1.08165	-1.08165	0.00326395	C/D		snR19	-12.0388	-1.63186	1.63186	0.00469696	U1		snR36	-15.6534	1.32219	-1.32219	0.000442908	H/ACA
snR56	-14.1558	1.06432	-1.06432	0.00388424	C/D	snR3	-14.5935	0.949736	-0.949736	0.0103243	H/ACA		snR3	-15.001	-1.33578	1.33578	0.0211819	H/ACA		snR41	-13.4968	0.825133	-0.825133	0.0246413	C/D
snR57	-16.5057	1.85528	-1.85528	1.36856e-06	C/D	snR31	-15.363	0.750265	-0.750265	0.0437405	H/ACA		snR32	-15.3712	-1.40963	1.40963	0.0156393	H/ACA		snR42	-13.2	1.0008	-1.0008	0.00657163	H/ACA
snR58	-13.2622	1.24249	-1.24249	0.000753186	C/D	snR34	-13.4807	1.03417	-1.03417	0.00500816	H/ACA		snR34	-14.1472	-1.8977	1.8977	0.00121142	H/ACA		snR43	-13.8242	0.976741	-0.976741	0.00803698	H/ACA
snR60	-13.1156	0.979746	-0.979746	0.00752286	C/D	snR36	-15.6534	1.32219	-1.32219	0.000442908	H/ACA		snR36	-16.2665	-2.08499	2.08499	0.000579109	H/ACA		snR45	-12.4686	1.28435	-1.28435	0.000517042	C/D
snR62	-15.1894	1.60985	-1.60985	1.97609e-05	C/D	snR37	-12.2271	1.77563	-1.77563	2.15554e-06	H/ACA		snR37	-12.8957	-2.66281	2.66281	1.09329e-05	H/ACA		snR46	-14.6207	1.68928	-1.68928	7.29635e-06	H/ACA
snR64	-11.5591	1.23351	-1.23351	0.000793514	C/D	snR39B	-15.254	0.931681	-0.931681	0.0123707	C/D		snR4	-12.5305	-3.02794	3.02794	9.16498e-07	C/D		snR48	-11.5209	1.06875	-1.06875	0.00365512	C/D
snR65	-14.703	1.38654	-1.38654	0.000202136	C/D	snR40	-11.8905	1.27771	-1.27771	0.000543275	C/D		snR40	-12.1781	-1.38585	1.38585	0.0156623	C/D		snR49	-15.818	1.71259	-1.71259	7.14796e-06	H/ACA
snR66	-12.7884	0.871397	-0.871397	0.0171292	C/D	snR41	-13.4968	0.825133	-0.825133	0.0246413	C/D		snR41	-14.5596	-2.52268	2.52268	3.05075e-05	C/D		snR6	-16.5303	0.94795	-0.94795	0.0128295	U6
snR69	-13.1442	1.05834	-1.05834	0.00394386	C/D	snR42	-13.2	1.0008	-1.0008	0.00657163	H/ACA		snR42	-13.7463	-1.67041	1.67041	0.0039791	H/ACA		snR63	-12.1795	0.869607	-0.869607	0.017712	C/D
snR70	-14.205	1.04971	-1.04971	0.00444939	C/D	snR43	-13.8242	0.976741	-0.976741	0.00803698	H/ACA		snR43	-14.4091	-1.68054	1.68054	0.00394218	H/ACA		snR67	-14.1105	1.17234	-1.17234	0.00155442	C/D
snR73	-11.8348	1.58057	-1.58057	2.04776e-05	C/D	snR45	-12.4686	1.28435	-1.28435	0.000517042	C/D		snR45	-12.9246	-1.74631	1.74631	0.00262028	C/D		snR68	-13.3753	1.32519	-1.32519	0.000352711	C/D
snR76	-12.6361	0.794551	-0.794551	0.0295365	C/D	snR46	-14.6207	1.68928	-1.68928	7.29635e-06	H/ACA		snR46	-14.7231	-1.43659	1.43659	0.0132269	H/ACA		snR72	-14.942	0.760933	-0.760933	0.0393203	C/D
snR77	-12.5538	1.09682	-1.09682	0.0027966	C/D	snR47	-13.2124	1.31353	-1.31353	0.000392978	C/D		snR47	-13.6296	-1.67541	1.67541	0.00387166	C/D		These are snRNAs that increase in rrp6-wt and decrease in air2rrp6-rrp6, but not air1rrp6-rrp6
snR78	-12.6682	0.925487	-0.925487	0.0114004	C/D	snR48	-11.5209	1.06875	-1.06875	0.00365512	C/D		snR48	-12.2488	-2.05102	2.05102	0.000474449	C/D							7	Box H/ACA
snR79	-17.1526	0.842492	-0.842492	0.0296128	C/D	snR49	-15.818	1.71259	-1.71259	7.14796e-06	H/ACA		snR49	-16.2705	-2.15303	2.15303	0.000403368	H/ACA							9	Box C/D
snR80	-12.7769	0.78712	-0.78712	0.0310616	H/ACA	snR5	-14.4641	0.942529	-0.942529	0.0107885	H/ACA		snR51	-14.4813	-2.07854	2.07854	0.000448349	C/D							4	spliceosomal snRNA
snR83	-12.5861	1.67418	-1.67418	6.98105e-06	H/ACA	snR50	-15.3344	1.25299	-1.25299	0.000806289	C/D		snR53	-15.7965	-3.34154	3.34154	1.88597e-07	C/D							20	Total
snR86	-11.6639	1.02303	-1.02303	0.0051936	H/ACA	snR51	-13.8097	1.20819	-1.20819	0.00112374	C/D		snR55	-15.163	-1.22388	1.22388	0.0349652	C/D
snR87	-14.6714	1.32365	-1.32365	0.000378694	C/D	snR52	-12.9605	1.78467	-1.78467	1.98769e-06	C/D		snR57	-16.3944	-1.47696	1.47696	0.0127526	C/D
						snR53	-15.1881	2.61206	-2.61206	2.37464e-11	C/D		snR58	-14.2413	-2.97806	2.97806	1.48791e-06	C/D
						snR55	-15.5357	2.43482	-2.43482	4.26076e-10	C/D		snR6	-17.4971	-2.44154	2.44154	0.000141982	U6
						snR56	-14.2036	1.40661	-1.40661	0.000161184	C/D		snR60	-13.812	-2.15459	2.15459	0.000274074	C/D
						snR57	-15.903	0.896516	-0.896516	0.0173084	C/D		snR62	-16.1433	-3.30228	3.30228	2.76758e-07	C/D
						snR58	-13.497	1.95868	-1.95868	2.1841e-07	C/D		snR63	-12.8612	-1.80817	1.80817	0.00187955	C/D
						snR6	-16.5303	0.94795	-0.94795	0.0128295	U6		snR65	-15.0482	-1.85532	1.85532	0.00165526	C/D
						snR60	-13.0519	1.09902	-1.09902	0.00287114	C/D		snR66	-13.8914	-2.85396	2.85396	3.29074e-06	C/D
						snR62	-15.7886	3.05491	-3.05491	2.8029e-14	C/D		snR67	-14.5833	-1.65523	1.65523	0.00449141	C/D
						snR63	-12.1795	0.869607	-0.869607	0.017712	C/D		snR68	-14.1157	-2.33106	2.33106	9.73134e-05	C/D
						snR64	-11.626	1.61388	-1.61388	1.48772e-05	C/D		snR69	-14.0077	-2.57476	2.57476	2.09962e-05	C/D
						snR65	-14.811	1.84908	-1.84908	1.0429e-06	C/D		snR7-L	-15.395	-1.15369	1.15369	0.0470977	U5
						snR66	-12.7443	1.0298	-1.0298	0.00513143	C/D		snR70	-14.5718	-1.55046	1.55046	0.00758462	C/D
						snR67	-14.1105	1.17234	-1.17234	0.00155442	C/D		snR72	-15.5129	-1.44603	1.44603	0.0134452	C/D
						snR68	-13.3753	1.32519	-1.32519	0.000352711	C/D		snR73	-13.0095	-3.70146	3.70146	7.64668e-09	C/D
						snR69	-13.4899	1.99617	-1.99617	1.33233e-07	C/D		snR74	-16.5426	-1.80781	1.80781	0.00271657	C/D
						snR7-L	-15.0377	0.866864	-0.866864	0.0192723	U5		snR76	-13.6557	-2.62562	2.62562	1.45251e-05	C/D
						snR70	-14.5495	1.98527	-1.98527	1.7022e-07	C/D		snR77	-12.7827	-1.32504	1.32504	0.0208515	C/D
						snR71	-14.4942	1.11511	-1.11511	0.00262217	C/D		snR80	-13.8204	-2.67519	2.67519	1.05672e-05	H/ACA
						snR72	-14.942	0.760933	-0.760933	0.0393203	C/D		snR82	-14.0424	-1.99627	1.99627	0.000698523	H/ACA
						snR73	-11.9943	2.14618	-2.14618	1.52785e-08	C/D		snR83	-13.3805	-3.0317	3.0317	9.40666e-07	H/ACA
						snR76	-12.929	1.62698	-1.62698	1.32369e-05	C/D		snR86	-12.4853	-2.43722	2.43722	4.57924e-05	H/ACA
						snR77	-12.3208	0.87738	-0.87738	0.0167247	C/D		snR87	-14.7731	-1.28565	1.28565	0.0261485	C/D
						snR78	-12.6175	1.07065	-1.07065	0.00362805	C/D
						snR80	-12.7701	1.02005	-1.02005	0.00559843	H/ACA
						snR83	-12.4011	1.5507	-1.5507	3.11536e-05	H/ACA
						snR84	-15.0212	0.879638	-0.879638	0.0176458	H/ACA
						snR85	-14.6409	0.763109	-0.763109	0.0384167	H/ACA
						snR86	-11.3942	0.730239	-0.730239	0.0457332	H/ACA
						snR87	-14.6886	1.60472	-1.60472	1.88041e-05	C/D
Bold for air1rrp6-rrp6 indicates increased in rrp6-wt.						snR9	-14.823	1.28043	-1.28043	0.000591124	H/ACA
There are no snRNAs that increase in rrp6-wt and decrease in air1rrp6-rrp6,
which do not also decrease in air2rrp6-rrp6.													Bold for rrp6-wt indicates decreased in either air1rrp6-rrp6 or air2rrp6-rrp6
						Bold for air2rrp6-rrp6 indicates increased in rrp6-wt
						Bold and blue indicates increased in rrp6-wt,
						and decreased for air2rrp6-rrp6, but not air1rrp6-rrp6
