# Supplementary material
Source: HighWire-hosted journal article supplement (doi:10.1101/rna.033431.112)
Supplement: Schmidt_et_al._Supplementary_Table_4.xlsx [file Schmidt_et_al._Supplementary_Table_4.xlsx]

## Sheet: Sheet1
Gene ontology via amiGO
Strain comparison	GO_term Biological Process	Cluster frequency	P-value	Gene(s) annotated to the term
rrp6/wt decrease	generation of precursor metabolites and energy	40/319 genes, 12.5%	1.12e-09	UGP1 MIC17 SGA1 TDH1 SHY1 CYB2 LSC2 GPM2 CIT3 TDH2 EMI2 COX13 NDE2 GSM1 GPH1 ADH2 ENO1 PCL7 COQ5 HXK1 CIT1 MLS1 ADH5 DLD1 HAP4 PGM2 GSY1 PYK2 GAC1 GLC3 COX5B GIP2 HOR2 ADH1 GSY2 CYC7 GLC8 RGI1 CIT2 GLK1
	oxidation-reduction process	54/319 genes, 16.9%	8.6e-07	UGP1 MIC17 MAE1 MET16 FMS1 SGA1 TDH1 SRX1 BDH2 SHY1 CYB2 AYR1 LSC2 CIT3 TDH2 ERV2 COX13 SOL4 AST1 NDE2 XYL2 SOD2 GPH1 ADH2 PCL7 GDH1 ADI1 COQ5 CIT1 BDH1 MLS1 ADH5 GDH3 DLD1 HAP4 PGM2 GSY1 FOX2 RFS1 GAC1 FMP46 GLC3 AIM17 COX5B GIP2 UGA2 HOR2 ADH1 GSY2 ALD5 CYC7 GLC8 RGI1 CIT2
	energy derivation by oxidation of organic compounds	30/319 genes, 9.4%	4.58e-07	UGP1 MIC17 SGA1 SHY1 LSC2 CIT3 COX13 NDE2 GPH1 ADH2 PCL7 COQ5 CIT1 MLS1 ADH5 DLD1 HAP4 PGM2 GSY1 GAC1 GLC3 COX5B GIP2 HOR2 ADH1 GSY2 CYC7 GLC8 RGI1 CIT2
	glycogen metabolic process	11/319 genes, 3.4%	0.000428	UGP1 SGA1 GPH1 PCL7 PGM2 GSY1 GAC1 GLC3 GIP2 GSY2 GLC8
rrp6/wt increase	cytogamy	4/70 genes, 5.7%	0.0015	PRM1 FIG1 FUS2 FIG2
air2rrp6/rrp6 decrease	glycogen metabolic process	6/40 genes, 15.0%	2.45e-05	GLC3, GSY1, IGD1, PGM2, GAC1, GPH1
	monosaccharide transport	5/40 genes, 12.5%	0.000215	MTH1, HXT7, HXT6, HXK1, HXT4
	energy derivation by oxidation of organic compounds	9/40 genes, 22.5%	0.000329	DLD1, GLC3, GSY1, IGD1, QCR8, ISF1, PGM2, GAC1, GPH1
	generation of precursor metabolites and energy	10/40 genes, 25%	0.000518	DLD1, GLC3, GSY1, IGD1, HXK1, QCR8, ISF1, PGM2, GAC1, GPH1
air2rrp6/rrp6 increase	iron ion transport	6/ 65 genes, 9.2%	0.000744	FIT1, ARN1, FRE2, FRE4, FIT2, FIT3
	iron ion homestasis	7/65, genes 10.8%	0.000554	FIT1, ARN1, FRE2, FRE4, FIT2, FIT3, TIS11
air1rrp6/rrp6 decrease	none*	0/46 genes
air1rrp6/rrp6 increase	cytoplamic translation	23/249, 9.2%	0.000427	RPL35A RPS30B TAE1 RPL2A RPL17B RPL23B RPS28B TMA19 RPS12 RPS19A RPL39 RPS27A RPS10B RPL19A RPL20A RPS21B RPL34B RPL43B RPS21A TMA7 RPS18B RPL29 RPS10A
	* note that the 4 genes encoded by the 2m plasmid are not listed with common GO biological processes in amiGO
