# Supplementary material
Source: HighWire-hosted journal article supplement (doi:10.1101/rna.033431.112)
Supplement: Schmidt_et_al._Supplementary_Table_6.xlsx [file Schmidt_et_al._Supplementary_Table_6.xlsx]

## Sheet: Sheet1
		rrp6-wt	rrp6-wt	rrp6-wt	rrp6-wt	air1rrp6-rrp6	air1rrp6-rrp6	air1rrp6-rrp6	air1rrp6-rrp6	air2rrp6-rrp6	air2rrp6-rrp6	air2rrp6-rrp6	air2rrp6-rrp6	air1-wt	air1-wt	air1-wt	air1-wt	air2-wt	air2-wt	air2-wt	air2-wt
Gene	Annotation	log2Conc	log2FC(wt/rrp6)	log2FC(rrp6/wt)	p.value	log2Conc	log2FC(rrp6/air1rrp6)	log2FC(air1rrp6/rrp6)	p.value	log2Conc	log2FC(rrp6/air2rrp6)	log2FC(air2rrp6/rrp6)	p.value	log2Conc	log2FC(wt/air1)	log2FC(air1/wt)	p.value	log2Conc	log2FC(wt/air2)	log2FC(air2/wt)	p.value
15S_rRNA	15S_RRNA,15S_RRNA_2	-8.4621	-0.105092	0.105092	0.933813	-8.34237	0.059901	-0.059901	0.868524	-8.26467	0.151061	-0.151061	0.677667	-8.44712	0.0209145	-0.0209145	0.975618	-8.32823	-0.0531504	0.0531504	0.816303
21S_rRNA	21S_RRNA,21S_rRNA_3,21S_rRNA_4	-6.55025	0.112844	-0.112844	0.730144	-6.4867	-0.0376765	0.0376765	0.91707	-6.37544	-0.0136468	0.0136468	0.970041	-6.4842	-0.0948767	0.0948767	0.730205	-6.3334	-0.105147	0.105147	0.706218
CEN1	CEN1	-50.0161	0	0	1	-50.0161	0	0	1	-50.0161	0	0	1	-50.0161	0	0	1	-50.0161	0	0	1
CEN10	CEN10	-50.0161	0	0	1	-50.0161	0	0	1	-50.0161	0	0	1	-50.0161	0	0	1	-50.0161	0	0	1
CEN11	CEN11	-50.0161	0	0	1	-50.0161	0	0	1	-50.0161	0	0	1	-50.0161	0	0	1	-50.0161	0	0	1
CEN12	CEN12	-50.0161	0	0	1	-50.0161	0	0	1	-50.0161	0	0	1	-50.0161	0	0	1	-50.0161	0	0	1
CEN13	CEN13	-50.0161	0	0	1	-50.0161	0	0	1	-50.0161	0	0	1	-50.0161	0	0	1	-50.0161	0	0	1
CEN14	CEN14	-50.0161	0	0	1	-50.0161	0	0	1	-50.0161	0	0	1	-50.0161	0	0	1	-50.0161	0	0	1
CEN15	CEN15	-50.0161	0	0	1	-50.0161	0	0	1	-50.0161	0	0	1	-50.0161	0	0	1	-50.0161	0	0	1
CEN16	CEN16	-50.0161	0	0	1	-50.0161	0	0	1	-50.0161	0	0	1	-50.0161	0	0	1	-50.0161	0	0	1
CEN2	CEN2	-50.0161	0	0	1	-50.0161	0	0	1	-50.0161	0	0	1	-50.0161	0	0	1	-50.0161	0	0	1
CEN3	CEN3	-50.0161	0	0	1	-50.0161	0	0	1	-50.0161	0	0	1	-50.0161	0	0	1	-50.0161	0	0	1
CEN4	CEN4	-50.0161	0	0	1	-50.0161	0	0	1	-50.0161	0	0	1	-50.0161	0	0	1	-50.0161	0	0	1
CEN5	CEN5	-50.0161	0	0	1	-50.0161	0	0	1	-50.0161	0	0	1	-50.0161	0	0	1	-50.0161	0	0	1
CEN6	CEN6	-50.0161	0	0	1	-50.0161	0	0	1	-50.0161	0	0	1	-50.0161	0	0	1	-50.0161	0	0	1
CEN7	CEN7	-50.0161	0	0	1	-50.0161	0	0	1	-50.0161	0	0	1	-50.0161	0	0	1	-50.0161	0	0	1
CEN8	CEN8	-50.0161	0	0	1	-50.0161	0	0	1	-50.0161	0	0	1	-50.0161	0	0	1	-50.0161	0	0	1
CEN9	CEN9	-50.0161	0	0	1	-50.0161	0	0	1	-50.0161	0	0	1	-50.0161	0	0	1	-50.0161	0	0	1
CUT001	bothEndsMapped	-20.1184	-3.74493	3.74493	1.8644e-05	-18.3769	0.462882	-0.462882	0.257534	-17.9302	-0.183964	0.183964	0.650511	-20.3036	3.26038	-3.26038	4.74929e-05	-19.8177	3.92037	-3.92037	3.72875e-08
CUT002	bothEndsMapped	-35.3549	-29.3223	29.3223	0.00388256	-20.616	-0.00221916	0.00221916	0.922594	-20.2825	-0.421709	0.421709	0.470656	-35.345	29.342	-29.342	0.00174377	-35.0598	29.9125	-29.9125	0.000111878
CUT003	mappedNone	-36.601	-26.83	26.83	0.205111	-24.132	2.0966	-2.0966	0.240022	-23.5209	1.12128	-1.12128	0.536332	-37.6294	24.7732	-24.7732	1	-37.0608	25.9106	-25.9106	1
CUT004	bothEndsMapped	-19.7947	-1.56218	1.56218	0.0382897	-18.7461	-0.334388	0.334388	0.454092	-18.6606	-0.258689	0.258689	0.565788	-19.5799	1.8776	-1.8776	0.00254247	-19.4571	1.81141	-1.81141	0.00465805
CUT005	bothEndsMapped	-36.1583	-27.7155	27.7155	0.0552824	-21.6056	-1.1909	1.1909	0.0939138	-21.8633	-0.428721	0.428721	0.638278	-35.5446	28.943	-28.943	0.00863981	-35.8459	28.3402	-28.3402	0.0985698
CUT006	bothEndsMapped	-37.0973	-25.8374	25.8374	0.572849	-22.9055	-2.34629	2.34629	0.057223	-22.8926	-2.125	2.125	0.0559653	-35.9042	28.2237	-28.2237	0.0451569	-35.9381	28.1559	-28.1559	0.0299618
CUT007	bothEndsMapped	-21.1875	-4.77668	4.77668	2.86987e-05	-18.8482	0.346369	-0.346369	0.469045	-18.775	0.446195	-0.446195	0.307359	-21.3034	4.4306	-4.4306	2.61523e-05	-21.191	4.34365	-4.34365	7.23143e-06
CUT008	bothEndsMapped	-23.1977	-0.756238	0.756238	1	-23.1421	0.876513	-0.876513	0.771234	-22.7103	0.25944	-0.25944	1	-23.5829	-0.128389	0.128389	1	-23.1159	0.493889	-0.493889	1
CUT009	mapped3	-36.7283	-26.5755	26.5755	0.335543	-23.7501	0.818675	-0.818675	0.74229	-23.4293	0.424114	-0.424114	1	-37.122	25.7881	-25.7881	1	-36.8444	26.3433	-26.3433	0.322673
CUT010	bothEndsMapped	-20.4667	-1.57426	1.57426	0.0781782	-19.3668	-0.421586	0.421586	0.373827	-19.6163	0.324068	-0.324068	0.544845	-20.2055	1.98257	-1.98257	0.00728767	-20.4253	1.23108	-1.23108	0.108309
CUT011	mapped5	-19.8691	-2.76956	2.76956	0.00085957	-18.2324	-0.285176	0.285176	0.500871	-18.2459	-0.0117672	0.0117672	1	-19.6741	3.04544	-3.04544	1.06005e-05	-19.6506	2.78054	-2.78054	4.16243e-05
CUT012	mapped3	-34.8482	-30.3357	30.3357	6.18285e-05	-20.0397	0.9154	-0.9154	0.0588406	-19.5415	0.16575	-0.16575	0.732508	-35.2865	29.459	-29.459	0.000760861	-34.8331	30.3658	-30.3658	5.77146e-05
CUT013	bothEndsMapped	-23.0751	-1.00143	1.00143	0.755494	-22.1512	-0.656308	0.656308	0.560087	-22.1815	-0.348629	0.348629	0.855177	-22.7066	1.62429	-1.62429	0.552955	-22.6914	1.3429	-1.3429	0.551865
CUT014	bothEndsMapped	-22.5638	-2.02403	2.02403	0.180995	-21.1903	-0.468523	0.468523	0.433197	-20.6691	-1.26511	1.26511	0.0173874	-22.2747	2.48816	-2.48816	0.0755163	-21.7093	3.30712	-3.30712	0.00634048
CUT015	bothEndsMapped	-17.6601	-2.11553	2.11553	0.000952212	-16.8191	0.642301	-0.642301	0.0901662	-16.9111	1.07267	-1.07267	0.00508275	-17.9315	1.45856	-1.45856	0.00313026	-17.9856	1.03852	-1.03852	0.0330491
CUT016	bothEndsMapped	-20.6731	-1.16165	1.16165	0.271032	-20.1069	0.24291	-0.24291	0.652557	-20.6046	1.48494	-1.48494	0.00609008	-20.7439	0.905821	-0.905821	0.286128	-21.205	-0.328156	0.328156	0.708794
CUT017	mapped5	-18.987	-3.17756	3.17756	1.67796e-05	-17.5129	0.440086	-0.440086	0.261626	-17.2166	0.0940313	-0.0940313	0.811374	-19.1571	2.72337	-2.72337	8.70761e-06	-18.8227	3.08021	-3.08021	1.21103e-07
CUT018	bothEndsMapped	-22.6561	-1.83942	1.83942	0.331013	-21.8999	0.558015	-0.558015	0.603226	-21.3634	-0.268615	0.268615	0.701535	-22.8803	1.27679	-1.27679	0.743156	-22.3048	2.11606	-2.11606	0.193027
CUT019	bothEndsMapped	-19.897	-3.35771	3.35771	5.97452e-05	-18.3418	0.455849	-0.455849	0.267218	-18.058	0.134818	-0.134818	0.752732	-20.0744	2.88858	-2.88858	8.23216e-05	-19.7541	3.2175	-3.2175	3.39125e-06
CUT020	mapped5	-20.7626	-2.45649	2.45649	0.0105438	-19.4337	-0.00520148	0.00520148	1	-19.6629	0.700065	-0.700065	0.116962	-20.7119	2.44382	-2.44382	0.00447351	-20.9026	1.75053	-1.75053	0.0552328
CUT021	bothEndsMapped	-20.8417	-3.46828	3.46828	0.000400866	-18.8739	-0.305399	0.305399	0.555452	-18.8399	-0.126241	0.126241	0.798358	-20.6477	3.74211	-3.74211	1.37882e-05	-20.5833	3.55906	-3.55906	3.28114e-05
CUT022	bothEndsMapped	-35.234	-29.5641	29.5641	0.00197825	-20.3434	-0.0254321	0.0254321	1	-20.1137	-0.238052	0.238052	0.735499	-35.1997	29.6328	-29.6328	0.00415315	-35.0119	30.0083	-30.0083	0.000131163
CUT023	mapped3	-21.5198	-4.11194	4.11194	0.000343556	-19.4747	0.232181	-0.232181	0.63815	-19.1594	-0.151766	0.151766	0.72505	-21.5889	3.85973	-3.85973	0.000279856	-21.2339	4.25786	-4.25786	1.55304e-05
CUT024	mapped5	-21.2107	-4.73015	4.73015	1.18697e-05	-19.0174	0.543596	-0.543596	0.217106	-19.0213	0.797888	-0.797888	0.0670452	-21.4346	4.16824	-4.16824	4.95538e-05	-21.4038	3.91802	-3.91802	0.000146421
CUT025	bothEndsMapped	-18.362	-2.42759	2.42759	0.000316431	-16.9514	-0.19618	0.19618	0.618959	-16.8563	-0.139704	0.139704	0.714053	-18.2182	2.60113	-2.60113	8.39358e-07	-18.084	2.55754	-2.55754	7.37536e-07
CUT026	bothEndsMapped	-35.083	-29.866	29.866	0.000511929	-20.6077	1.12947	-1.12947	0.0407196	-20.2566	0.673771	-0.673771	0.222417	-35.6265	28.779	-28.779	0.00784961	-35.3182	29.3956	-29.3956	0.00270927
CUT027	bothEndsMapped	-33.9386	-32.1549	32.1549	6.02576e-09	-18.131	0.763936	-0.763936	0.0648393	-17.9718	0.691962	-0.691962	0.0842862	-34.2986	31.435	-31.435	1.5375e-08	-34.1767	31.6787	-31.6787	4.48276e-09
CUT028	mapped5	-34.931	-30.1701	30.1701	0.000146332	-19.7919	0.107936	-0.107936	0.900139	-19.3508	-0.527727	0.527727	0.224205	-34.9635	30.1051	-30.1051	0.000327438	-34.5641	30.9038	-30.9038	9.59589e-07
CUT029	bothEndsMapped	-35.1212	-29.7897	29.7897	0.00083094	-20.2232	0.190738	-0.190738	0.749854	-19.9172	-0.174423	0.174423	0.763536	-35.1992	29.6338	-29.6338	0.00284521	-34.9355	30.1612	-30.1612	4.29071e-05
CUT030	bothEndsMapped	-19.5949	-1.96179	1.96179	0.010838	-18.1569	-0.71373	0.71373	0.0788836	-18.3786	-0.0236834	0.0236834	0.961522	-19.1913	2.65483	-2.65483	1.39308e-05	-19.3773	1.97106	-1.97106	0.0014704
CUT031	mapped5	-35.7411	-28.5498	28.5498	0.0675844	-21.5511	0.383006	-0.383006	0.539234	-21.5047	0.536687	-0.536687	0.416271	-35.9081	28.2159	-28.2159	0.0451569	-35.9043	28.2234	-28.2234	0.14982
CUT032	mapped3	-21.5225	-4.10667	4.10667	0.000343556	-19.9452	1.16441	-1.16441	0.0187418	-19.5928	0.706184	-0.706184	0.137026	-22.0554	2.92664	-2.92664	0.0303891	-21.6703	3.38501	-3.38501	0.00402664
CUT033	bothEndsMapped	-35.9588	-28.1144	28.1144	0.0262834	-22.0025	0.375018	-0.375018	0.582921	-21.7732	0.163786	-0.163786	0.88107	-36.1331	27.7658	-27.7658	0.120799	-35.9475	28.137	-28.137	0.0299618
CUT034	bothEndsMapped	-35.2641	-29.5039	29.5039	0.00259632	-20.3738	-0.0605717	0.0605717	0.931459	-20.4264	0.291049	-0.291049	0.633017	-35.214	29.6041	-29.6041	0.00415315	-35.3055	29.4211	-29.4211	0.0018774
CUT035	mapped3	-20.4934	-4.16478	4.16478	8.38316e-06	-18.4309	0.279375	-0.279375	0.518065	-18.1158	-0.104464	0.104464	0.789289	-20.5775	3.88247	-3.88247	4.16162e-06	-20.2212	4.28317	-4.28317	5.81262e-08
CUT036	mapped5	-35.2222	-29.5878	29.5878	0.00152273	-20.3903	0.121027	-0.121027	0.931459	-20.4936	0.574386	-0.574386	0.327726	-35.2677	29.4967	-29.4967	0.000519935	-35.4121	29.208	-29.208	0.00509791
CUT037	bothEndsMapped	-20.2598	-3.462	3.462	9.80033e-05	-18.8154	0.802454	-0.802454	0.0645869	-18.5591	0.53632	-0.53632	0.196416	-20.6074	2.65266	-2.65266	0.000901221	-20.3123	2.93104	-2.93104	0.0001256
CUT038	mapped5	-20.3977	-2.35615	2.35615	0.00885173	-18.9731	-0.30673	0.30673	0.532168	-18.8139	-0.378233	0.378233	0.412758	-20.2011	2.63531	-2.63531	0.000596784	-20.0025	2.72055	-2.72055	0.000124027
CUT039	bothEndsMapped	-34.5202	-30.9918	30.9918	2.14548e-06	-19.1204	0.387707	-0.387707	0.395757	-18.8258	0.0453065	-0.0453065	0.924002	-34.6973	30.6375	-30.6375	1.26582e-05	-34.4427	31.1467	-31.1467	1.04809e-07
CUT040	bothEndsMapped	-34.0792	-31.8738	31.8738	3.84125e-08	-17.9522	-0.172246	0.172246	0.677451	-17.7269	-0.376113	0.376113	0.342442	-33.974	32.0841	-32.0841	2.64193e-11	-33.7874	32.4574	-32.4574	4.9677e-13
CUT041	bothEndsMapped	-21.1743	-4.80299	4.80299	2.94753e-05	-18.6327	-0.0877507	0.0877507	0.873276	-18.5745	0.042603	-0.042603	0.91308	-21.0851	4.86724	-4.86724	1.18663e-06	-20.9894	4.74689	-4.74689	9.76937e-07
CUT042	mapped5	-35.6305	-28.7711	28.7711	0.0248723	-20.4115	-1.43453	1.43453	0.00851308	-20.315	-1.38131	1.38131	0.00647946	-34.8839	30.2642	-30.2642	0.000144994	-34.8331	30.3658	-30.3658	5.77146e-05
CUT043	bothEndsMapped	-20.5523	-2.04694	2.04694	0.0188409	-19.5427	0.22195	-0.22195	0.583407	-19.3323	0.0480096	-0.0480096	0.965775	-20.6135	1.81049	-1.81049	0.0235508	-20.3751	1.9754	-1.9754	0.0125022
CUT044	bothEndsMapped	-19.2126	-0.726395	0.726395	0.328672	-18.7705	0.0433071	-0.0433071	0.917095	-18.4979	-0.255162	0.255162	0.534232	-19.1869	0.663627	-0.663627	0.279794	-18.8795	0.966572	-0.966572	0.0691723
CUT045	bothEndsMapped	-21.2118	-4.728	4.728	1.18697e-05	-19.0919	0.69607	-0.69607	0.11543	-18.9093	0.577637	-0.577637	0.171044	-21.51	4.01757	-4.01757	0.000132867	-21.2903	4.14502	-4.14502	3.44046e-05
CUT046	mapped3	-35.8839	-28.2644	28.2644	0.0176816	-22.1366	0.965222	-0.965222	0.169148	-21.9822	0.903263	-0.903263	0.333595	-36.3458	27.3405	-27.3405	0.192139	-36.2451	27.542	-27.542	0.0720844
CUT047	bothEndsMapped	-35.3118	-29.4084	29.4084	0.0029662	-20.3509	-0.288921	0.288921	0.666907	-20.2761	-0.192089	0.192089	0.710943	-35.1405	29.7511	-29.7511	0.00197937	-35.1109	29.8104	-29.8104	0.000301144
CUT048	mapped5	-20.6315	-1.88869	1.88869	0.0368317	-19.3902	-0.40227	0.40227	0.423655	-19.4744	0.0128871	-0.0128871	1	-20.385	2.26745	-2.26745	0.00422864	-20.4319	1.86185	-1.86185	0.0165131
CUT049	bothEndsMapped	-20.411	-3.15968	3.15968	0.000495616	-19.0832	0.688735	-0.688735	0.107836	-18.4344	-0.361971	0.361971	0.39919	-20.7086	2.45037	-2.45037	0.00447351	-20.0266	3.50257	-3.50257	2.46537e-06
CUT050	bothEndsMapped	-19.7224	-1.70689	1.70689	0.0296134	-18.5911	-0.35975	0.35975	0.402789	-18.4886	-0.317942	0.317942	0.453781	-19.4979	2.04176	-2.04176	0.00101584	-19.3557	2.01423	-2.01423	0.00113208
CUT051	bothEndsMapped	-22.0147	-3.12217	3.12217	0.0205151	-20.8153	0.930424	-0.930424	0.119651	-20.2337	0.013846	-0.013846	1	-22.4302	2.177	-2.177	0.210622	-21.8098	3.10612	-3.10612	0.00624828
CUT052	mappedNone	-35.8762	-28.2797	28.2797	0.0176816	-21.8943	0.546836	-0.546836	0.603226	-21.8683	0.741146	-0.741146	0.333595	-36.1248	27.7824	-27.7824	0.120799	-36.1349	27.7623	-27.7623	0.0720844
CUT053	bothEndsMapped	-35.4927	-29.0466	29.0466	0.0147785	-20.9624	0.216157	-0.216157	0.908046	-20.6888	-0.0847911	0.0847911	0.926562	-35.5772	28.8778	-28.8778	0.00863981	-35.3399	29.3522	-29.3522	0.00397137
CUT054	bothEndsMapped	-20.0998	-2.95194	2.95194	0.000572597	-18.3574	-0.32941	0.32941	0.437132	-18.427	0.0562709	-0.0562709	0.900677	-19.8887	3.26001	-3.26001	3.88123e-06	-19.9183	2.88906	-2.88906	6.64218e-05
CUT055	mapped3	-22.6559	-1.78247	1.78247	0.244476	-22.157	0.97545	-0.97545	0.254955	-21.2211	-0.649336	0.649336	0.29671	-23.0972	0.785635	-0.785635	1	-22.1387	2.39081	-2.39081	0.0625699
CUT056	mapped5	-23.3898	-0.371932	0.371932	1	-23.1398	0.0866935	-0.0866935	1	-22.914	-0.118354	0.118354	1	-23.3819	0.273761	-0.273761	1	-23.1212	0.483287	-0.483287	1
CUT057	bothEndsMapped	-35.1774	-29.6772	29.6772	0.0013977	-20.9812	1.46061	-1.46061	0.0187659	-20.3306	0.406423	-0.406423	0.45333	-35.8963	28.2395	-28.2395	0.0451569	-35.2861	29.4599	-29.4599	0.0018774
CUT058	bothEndsMapped	-21.6273	-3.89695	3.89695	0.000929137	-19.7487	0.350886	-0.350886	0.499645	-19.8965	0.893223	-0.893223	0.0708918	-21.7506	3.53622	-3.53622	0.00189146	-21.8669	2.99184	-2.99184	0.0115235
CUT059	mapped5	-34.8584	-30.3153	30.3153	7.62644e-05	-19.9582	0.695571	-0.695571	0.183811	-19.5176	0.0613318	-0.0613318	0.92367	-35.1986	29.6348	-29.6348	0.00284521	-34.7943	30.4435	-30.4435	2.51437e-05
CUT060	bothEndsMapped	-35.5257	-28.9807	28.9807	0.0147785	-21.1359	0.364921	-0.364921	0.449771	-21.2031	0.74675	-0.74675	0.312074	-35.6935	28.645	-28.645	0.0187993	-35.8182	28.3956	-28.3956	0.0442305
CUT061	mappedNone	-36.7959	26.4402	-26.4402	0.333333	-37.5982	-24.8358	24.8358	1	-37.3461	-25.3399	25.3399	0.507742	-24.3808	-1.72409	1.72409	0.552398	-24.03	-1.3344	1.3344	0.262239
CUT062	bothEndsMapped	-19.7823	-2.94314	2.94314	0.000326663	-18.3003	0.184556	-0.184556	0.640224	-18.2195	0.269555	-0.269555	0.513636	-19.8245	2.74456	-2.74456	4.65008e-05	-19.7086	2.66458	-2.66458	9.65217e-05
CUT063	mapped3	-35.9874	-28.0573	28.0573	0.0401085	-21.5643	-0.58658	0.58658	0.539234	-21.4444	-0.5795	0.5795	0.433882	-35.6752	28.6817	-28.6817	0.0119756	-35.6021	28.8279	-28.8279	0.014625
CUT064	mapped3	-20.7967	-5.5583	5.5583	2.45075e-07	-18.1451	0.474037	-0.474037	0.243255	-18.0671	0.564449	-0.564449	0.157243	-20.9829	5.07173	-5.07173	1.65317e-07	-20.8652	4.99516	-4.99516	9.83851e-08
CUT065	bothEndsMapped	-20.1539	-3.67396	3.67396	2.96399e-05	-18.5156	0.616177	-0.616177	0.134489	-18.2846	0.40073	-0.40073	0.340653	-20.4095	3.04864	-3.04864	8.95488e-05	-20.1428	3.27005	-3.27005	1.51017e-05
CUT066	mapped5	-21.4574	-4.2368	4.2368	0.000201128	-19.0875	-0.277417	0.277417	0.526944	-19.5339	0.861868	-0.861868	0.0627442	-21.2656	4.50628	-4.50628	1.85704e-05	-21.6745	3.37663	-3.37663	0.00533659
CUT067	bothEndsMapped	-20.632	-1.88757	1.88757	0.0368317	-19.2843	-0.571298	0.571298	0.186062	-19.5525	0.211269	-0.211269	0.690507	-20.2922	2.45312	-2.45312	0.00171367	-20.52	1.68563	-1.68563	0.0327091
CUT068	bothEndsMapped	-22.8392	-1.47331	1.47331	0.426895	-21.6218	-0.739936	0.739936	0.269187	-21.5749	-0.587328	0.587328	0.397543	-22.4192	2.19917	-2.19917	0.210622	-22.3325	2.06066	-2.06066	0.193027
CUT069	mapped5	-35.6249	-28.7824	28.7824	0.0248723	-20.8595	-0.521291	0.521291	0.375953	-20.9804	-0.0330913	0.0330913	1	-35.3386	29.3549	-29.3549	0.00174377	-35.5013	29.0296	-29.0296	0.0109414
CUT070	bothEndsMapped	-22.3809	1.61022	-1.61022	0.255626	-22.834	-0.499506	0.499506	0.79309	-22.8853	-0.149973	0.149973	0.8105	-22.0843	-1.13107	1.13107	0.346937	-22.1052	-1.48473	1.48473	0.262417
CUT071	bothEndsMapped	-19.4239	-1.1339	1.1339	0.122311	-18.599	-0.312401	0.312401	0.472893	-18.4394	-0.384945	0.384945	0.354082	-19.2204	1.42667	-1.42667	0.0159886	-19.0222	1.51129	-1.51129	0.00776728
CUT072	mapped3	-35.1207	-29.7907	29.7907	0.00083094	-20.2766	0.323092	-0.323092	0.564139	-19.6094	-0.764898	0.764898	0.0990393	-35.2574	29.5173	-29.5173	0.000519935	-34.6299	30.7723	-30.7723	3.66325e-06
CUT073	mapped5	-36.592	-26.848	26.848	0.205111	-22.4068	-1.32823	1.32823	0.193484	-22.8007	-0.293373	0.293373	1	-35.9081	28.2159	-28.2159	0.0451569	-36.3485	27.3352	-27.3352	0.205719
CUT074	mapped5	-24.681	2.21042	-2.21042	0.264923	-24.1317	-3.09506	3.09506	0.0874568	-24.6225	-1.86692	1.86692	0.393918	-23.0843	0.868927	-0.868927	1	-23.5345	-0.343347	0.343347	0.675348
CUT075	bothEndsMapped	-21.8183	-0.345075	0.345075	0.839517	-22.0524	1.04001	-1.04001	0.282762	-20.6892	-1.43996	1.43996	0.00717364	-22.2875	-0.707364	0.707364	0.514242	-20.8859	1.78395	-1.78395	0.035529
CUT076	bothEndsMapped	-20.3434	-2.46477	2.46477	0.00572276	-18.919	-0.174494	0.174494	0.704832	-18.6503	-0.46531	0.46531	0.266227	-20.2074	2.62269	-2.62269	0.000596784	-19.8985	2.92869	-2.92869	4.81904e-05
CUT077	mapped3	-22.5302	-2.09124	2.09124	0.13483	-21.6232	0.463786	-0.463786	0.539234	-21.3365	0.137303	-0.137303	0.901923	-22.7187	1.60008	-1.60008	0.54135	-22.3968	1.93211	-1.93211	0.255277
CUT078	bothEndsMapped	-20.9839	-3.18374	3.18374	0.00169757	-19.5089	0.443605	-0.443605	0.335714	-19.1153	-0.0969643	0.0969643	0.878823	-21.1555	2.72639	-2.72639	0.00672229	-20.7242	3.27715	-3.27715	0.000110725
CUT079	bothEndsMapped	-20.5539	-1.39992	1.39992	0.12442	-20.577	1.65649	-1.65649	0.00258389	-19.837	0.42317	-0.42317	0.387207	-21.3287	-0.263837	0.263837	0.658238	-20.5556	0.970576	-0.970576	0.220757
CUT080	bothEndsMapped	-21.044	-3.06363	3.06363	0.00290051	-19.3793	-0.0639637	0.0639637	0.920542	-19.229	-0.117963	0.117963	0.838794	-20.9647	3.10814	-3.10814	0.00110395	-20.776	3.1736	-3.1736	0.000235149
CUT081	bothEndsMapped	-20.191	-1.59963	1.59963	0.0549466	-19.187	-0.222219	0.222219	0.657919	-19.1201	-0.109097	0.109097	0.84957	-20.0362	1.79508	-1.79508	0.0104206	-19.9332	1.68932	-1.68932	0.0134391
CUT082	bothEndsMapped	-21.7368	-1.67799	1.67799	0.156804	-20.8491	0.101041	-0.101041	0.825453	-20.9511	0.551868	-0.551868	0.354951	-21.7363	1.56483	-1.56483	0.194954	-21.8112	1.10315	-1.10315	0.30742
CUT083	bothEndsMapped	-21.5683	-0.845113	0.845113	0.623189	-20.5074	-1.06305	1.06305	0.0459759	-20.6254	-0.580565	0.580565	0.29504	-20.986	1.89559	-1.89559	0.0416788	-21.071	1.41363	-1.41363	0.153898
CUT084	mapped5	-20.6001	-0.781417	0.781417	0.410995	-19.878	-0.425376	0.425376	0.354053	-20.3486	0.762029	-0.762029	0.147398	-20.3329	1.20182	-1.20182	0.122371	-20.7631	0.0295458	-0.0295458	1
CUT085	mapped3	-22.1528	-2.84597	2.84597	0.0624083	-20.9535	0.653954	-0.653954	0.311254	-20.3756	-0.255289	0.255289	0.640032	-22.4302	2.177	-2.177	0.210622	-21.8155	3.09469	-3.09469	0.00624828
CUT086	mapped3	-20.1188	-1.29932	1.29932	0.107901	-19.8495	0.973065	-0.973065	0.0537373	-19.5544	0.629457	-0.629457	0.171116	-20.5586	0.305551	-0.305551	0.768325	-20.2221	0.666654	-0.666654	0.390232
CUT087	mapped5	-16.7387	1.43356	-1.43356	0.00332542	-18.1247	1.57087	-1.57087	0.000143249	-16.2069	-2.01825	2.01825	1.691e-07	-17.4702	-3.01069	3.01069	5.85737e-14	-15.5107	0.596533	-0.596533	0.1432
CUT088	bothEndsMapped	-19.692	-4.59777	4.59777	6.94922e-08	-17.6603	0.74505	-0.74505	0.0580517	-17.2028	0.0765809	-0.0765809	0.848107	-20.015	3.83756	-3.83756	3.4493e-07	-19.519	4.51775	-4.51775	1.34507e-10
CUT089	mapped5	-19.2564	-2.29893	2.29893	0.0019083	-18.2142	0.44967	-0.44967	0.281751	-18.1241	0.515811	-0.515811	0.197076	-19.4245	1.84858	-1.84858	0.00351356	-19.2952	1.79537	-1.79537	0.00393184
CUT090	mapped5	-21.3238	-2.50402	2.50402	0.0281188	-20.8193	1.72159	-1.72159	0.0067305	-20.332	0.993384	-0.993384	0.0416447	-22.1357	0.766009	-0.766009	0.597434	-21.6001	1.52541	-1.52541	0.215117
CUT091	mapped3	-19.9266	-2.65461	2.65461	0.0014647	-18.3356	-0.319275	0.319275	0.457734	-18.1341	-0.47557	0.47557	0.234271	-19.7171	2.9595	-2.9595	1.9011e-05	-19.4788	3.12423	-3.12423	1.65186e-06
CUT092	bothEndsMapped	-20.1758	-4.80005	4.80005	4.10748e-07	-17.8812	0.444492	-0.444492	0.268776	-17.5664	0.0613943	-0.0613943	0.897118	-20.3421	4.3533	-4.3533	6.00356e-08	-19.9889	4.74778	-4.74778	1.23572e-09
CUT093	bothEndsMapped	-19.4931	-2.99545	2.99545	0.000157254	-17.9745	0.18504	-0.18504	0.658079	-17.7677	0.0178301	-0.0178301	0.986927	-19.5323	2.80288	-2.80288	1.69958e-05	-19.2868	2.98202	-2.98202	2.12102e-06
CUT094	mapped5	-21.3842	-1.21335	1.21335	0.312728	-21.117	0.905998	-0.905998	0.185384	-20.906	0.730477	-0.730477	0.179494	-21.7863	0.294989	-0.294989	1	-21.5288	0.498028	-0.498028	0.839832
CUT095	bothEndsMapped	-34.9605	-30.1112	30.1112	0.000230778	-19.3841	-0.839064	0.839064	0.0761163	-19.2643	-0.832025	0.832025	0.0616044	-34.5192	30.9938	-30.9938	6.56007e-07	-34.4451	31.1418	-31.1418	1.04809e-07
CUT096	bothEndsMapped	-23.6854	2.21917	-2.21917	0.12254	-24.1392	-1.09235	1.09235	1	-24.6191	0.114046	-0.114046	1	-23.0875	-1.13755	1.13755	0.357664	-23.53	-2.3344	2.3344	0.117097
CUT097	mapped5	-20.5686	-0.844568	0.844568	0.369392	-19.8888	-0.313355	0.313355	0.508762	-19.9129	-0.0185279	0.0185279	0.95204	-20.3688	1.12997	-1.12997	0.143019	-20.3556	0.844509	-0.844509	0.26651
CUT098	bothEndsMapped	-21.8852	-3.3813	3.3813	0.00738146	-20.3227	0.487972	-0.487972	0.40412	-19.7331	-0.444961	0.444961	0.354685	-22.077	2.88346	-2.88346	0.0303891	-21.4474	3.83082	-3.83082	0.000399541
CUT099	mapped3	-37.4055	-25.2211	25.2211	1	-24.9329	0.494893	-0.494893	1	-23.2879	-2.54853	2.54853	0.0152897	-37.6294	24.7732	-24.7732	1	-36.035	27.9621	-27.9621	0.0498917
CUT100	mapped3	-20.6914	-3.76879	3.76879	0.000102415	-18.7227	0.0617845	-0.0617845	0.919216	-18.7469	0.356559	-0.356559	0.411583	-20.6679	3.7017	-3.7017	1.73434e-05	-20.6546	3.41647	-3.41647	4.87282e-05
CUT101	bothEndsMapped	-35.5278	-28.9764	28.9764	0.0147785	-21.1356	0.38329	-0.38329	0.627037	-20.6857	-0.269579	0.269579	0.715559	-35.7083	28.6155	-28.6155	0.0119756	-35.2932	29.4458	-29.4458	0.0018774
CUT102	mapped3	-37.1073	-25.8176	25.8176	1	-37.0543	25.9236	-25.9236	0.261521	-23.6634	-0.611436	0.611436	0.742407	-50.0161	0	0	1	-36.6968	26.6385	-26.6385	0.322673
CUT103	bothEndsMapped	-20.6233	-1.90501	1.90501	0.0368317	-19.8167	0.521911	-0.521911	0.279851	-19.7205	0.575961	-0.575961	0.233154	-20.8275	1.38255	-1.38255	0.105795	-20.6973	1.33109	-1.33109	0.115553
CUT104	mapped5	-36.2233	-27.5856	27.5856	0.0851333	-22.9567	1.24723	-1.24723	0.311986	-23.4429	2.46656	-2.46656	0.0368042	-36.8316	26.3689	-26.3689	0.564941	-37.3566	25.3188	-25.3188	1
CUT105	bothEndsMapped	-34.5041	-31.0239	31.0239	1.55288e-06	-18.7459	-0.302567	0.302567	0.496323	-18.7932	0.0386782	-0.0386782	0.925206	-34.3378	31.3565	-31.3565	3.05932e-08	-34.4241	31.1839	-31.1839	1.04069e-07
CUT106	bothEndsMapped	-19.7952	-1.56127	1.56127	0.0382897	-19.0482	0.272355	-0.272355	0.539923	-18.7925	0.00761349	-0.00761349	1	-19.8829	1.27159	-1.27159	0.0587943	-19.5924	1.54091	-1.54091	0.0143799
CUT107	bothEndsMapped	-35.7839	-28.4643	28.4643	0.0613889	-21.2613	-0.326598	0.326598	0.588082	-21.1912	-0.220833	0.220833	0.720646	-35.5879	28.8563	-28.8563	0.00784961	-35.5596	28.9128	-28.9128	0.014625
CUT108	bothEndsMapped	-20.6031	-0.775575	0.775575	0.36342	-19.8444	-0.56106	0.56106	0.305377	-20.0499	0.0969658	-0.0969658	0.844814	-20.2806	1.30641	-1.30641	0.0833614	-20.4453	0.665164	-0.665164	0.469731
CUT109	bothEndsMapped	-34.2608	-31.5105	31.5105	3.98934e-07	-18.3344	-0.144467	0.144467	0.750729	-18.2419	-0.0827469	0.0827469	0.859648	-34.1708	31.6904	-31.6904	1.22358e-09	-34.119	31.7941	-31.7941	1.08821e-09
CUT110	bothEndsMapped	-20.5923	-2.79708	2.79708	0.00302437	-19.6116	1.06307	-1.06307	0.0297574	-18.8359	-0.241984	0.241984	0.561816	-21.0732	1.7211	-1.7211	0.0663861	-20.2558	3.04407	-3.04407	0.000104591
CUT111	bothEndsMapped	-34.3829	-31.2663	31.2663	3.71828e-07	-18.9445	0.602157	-0.602157	0.169641	-18.9535	0.866753	-0.866753	0.0469943	-34.6612	30.7096	-30.7096	5.25855e-06	-34.7134	30.6052	-30.6052	1.15852e-05
CUT112	bothEndsMapped	-21.4215	-4.30858	4.30858	0.000143816	-18.8567	-0.614105	0.614105	0.157415	-18.8305	-0.419893	0.419893	0.308838	-21.0647	4.90811	-4.90811	6.25502e-07	-21.0031	4.71937	-4.71937	1.01841e-06
CUT113	mapped3	-22.179	-0.793686	0.793686	0.671345	-20.6543	-2.09201	2.09201	0.000434067	-20.8969	-1.35926	1.35926	0.0302255	-21.0942	2.84914	-2.84914	0.00430644	-21.3026	2.12049	-2.12049	0.0330184
CUT114	bothEndsMapped	-22.1719	-2.80786	2.80786	0.0624083	-20.1844	-0.94423	0.94423	0.062358	-20.1467	-0.773218	0.773218	0.104137	-21.6453	3.74687	-3.74687	0.00061388	-21.575	3.57555	-3.57555	0.00151197
CUT115	bothEndsMapped	-21.8591	-3.43332	3.43332	0.00830768	-19.9748	-0.146763	0.146763	0.836206	-19.8871	-0.0751498	0.0751498	0.952774	-21.7441	3.54925	-3.54925	0.00214868	-21.6173	3.49097	-3.49097	0.0023398
CUT116	bothEndsMapped	-35.0032	-30.0257	30.0257	0.000237726	-19.6804	-0.434132	0.434132	0.378832	-19.9139	0.279751	-0.279751	0.58783	-34.7725	30.4872	-30.4872	2.561e-05	-35.0476	29.9369	-29.9369	0.000111878
CUT117	bothEndsMapped	-19.222	-5.53761	5.53761	1.97639e-10	-17.0461	1.41666	-1.41666	0.000269537	-16.0988	-0.23142	0.23142	0.5369	-19.8759	4.11577	-4.11577	2.69706e-08	-18.8901	5.77541	-5.77541	8.75056e-18
CUT118	mapped5	-20.7828	-5.58604	5.58604	2.43954e-07	-18.2516	0.747186	-0.747186	0.0726542	-17.6581	-0.193331	0.193331	0.615785	-21.1052	4.82713	-4.82713	1.48569e-06	-20.472	5.78171	-5.78171	6.52016e-11
CUT119	bothEndsMapped	-20.2217	-3.53829	3.53829	6.46311e-05	-18.9226	1.18258	-1.18258	0.00741275	-18.1245	-0.167222	0.167222	0.680074	-20.7591	2.34944	-2.34944	0.00524224	-19.9179	3.71981	-3.71981	2.74136e-07
CUT120	bothEndsMapped	-36.592	-26.848	26.848	0.205111	-22.553	-1.03578	1.03578	0.353335	-23.5306	1.1665	-1.1665	0.209452	-36.0538	27.9244	-27.9244	0.120799	-37.0721	25.888	-25.888	1
CUT121	bothEndsMapped	-21.3253	-4.50095	4.50095	4.10913e-05	-19.0365	0.11233	-0.11233	0.775115	-18.6871	-0.339638	0.339638	0.448267	-21.3349	4.36769	-4.36769	4.86096e-05	-20.9489	4.82773	-4.82773	5.35071e-07
CUT122	mapped5	-36.3116	-27.4089	27.4089	0.135458	-21.4293	-2.14768	2.14768	0.00145906	-21.72	-1.31942	1.31942	0.0682729	-35.2142	29.6037	-29.6037	0.00415315	-35.5515	28.9291	-28.9291	0.014625
CUT123	bothEndsMapped	-21.3272	-1.32734	1.32734	0.223613	-20.2732	-0.601912	0.601912	0.292838	-20.6627	0.424083	-0.424083	0.416781	-20.9813	1.90495	-1.90495	0.0416788	-21.3358	0.884128	-0.884128	0.475211
CUT124	bothEndsMapped	-21.4372	-2.27725	2.27725	0.0524823	-20.1056	-0.185676	0.185676	0.764182	-20.0779	0.00563575	-0.00563575	1	-21.2971	2.44325	-2.44325	0.0229156	-21.2347	2.25618	-2.25618	0.015323
CUT125	mapped3	-37.0973	-25.8374	25.8374	0.572849	-37.0473	25.9375	-25.9375	0.261521	-23.6332	-0.643985	0.643985	0.77136	-50.0161	0	0	1	-36.6803	26.6714	-26.6714	0.191544
CUT126	bothEndsMapped	-19.8993	-2.18311	2.18311	0.00647274	-18.6167	-0.172188	0.172188	0.727671	-18.6207	0.0824213	-0.0824213	0.843691	-19.7623	2.34305	-2.34305	0.000625946	-19.7292	2.09732	-2.09732	0.00181244
CUT127	mapped5	-36.4676	-27.0969	27.0969	0.135458	-23.9981	2.33743	-2.33743	0.209224	-23.3855	1.35945	-1.35945	0.264687	-37.6247	24.7828	-24.7828	1	-37.0551	25.922	-25.922	0.564576
CUT128	bothEndsMapped	-22.0311	-3.08951	3.08951	0.0259779	-20.6924	0.617665	-0.617665	0.322619	-20.7761	1.03184	-1.03184	0.075512	-22.2924	2.45269	-2.45269	0.10551	-22.3367	2.05222	-2.05222	0.261355
CUT129	bothEndsMapped	-21.1818	-4.78795	4.78795	3.37053e-05	-18.6422	-0.0702032	0.0702032	0.897233	-18.4571	-0.194025	0.194025	0.647767	-21.0927	4.85206	-4.85206	1.48569e-06	-20.8706	4.98448	-4.98448	1.18082e-07
CUT130	mapped5	-35.5058	-29.0206	29.0206	0.0147785	-20.7027	-0.366361	0.366361	0.543251	-20.9554	0.385594	-0.385594	0.598074	-35.3009	29.4303	-29.4303	0.000760861	-35.5927	28.8466	-28.8466	0.0214401
CUT131	mapped3	-19.5607	-1.11141	1.11141	0.127722	-19.0997	0.403966	-0.403966	0.355123	-18.8691	0.189425	-0.189425	0.694393	-19.7119	0.694893	-0.694893	0.343414	-19.4455	0.915701	-0.915701	0.143176
CUT132	mapped5	-34.5843	-30.8635	30.8635	3.55235e-06	-19.3703	0.672218	-0.672218	0.140988	-18.9632	0.104434	-0.104434	0.861467	-34.8915	30.2492	-30.2492	0.000144994	-34.5255	30.9811	-30.9811	5.64192e-07
CUT133	bothEndsMapped	-19.8284	-2.85097	2.85097	0.000478287	-18.3278	0.0475202	-0.0475202	0.936933	-18.0928	-0.175955	0.175955	0.687766	-19.8073	2.77894	-2.77894	3.61799e-05	-19.5326	3.01661	-3.01661	4.3912e-06
CUT134	bothEndsMapped	-35.4264	-29.1793	29.1793	0.00932655	-20.0592	-1.38297	1.38297	0.00862158	-20.1181	-1.01797	1.01797	0.05242	-34.7222	30.5878	-30.5878	1.41722e-05	-34.8237	30.3846	-30.3846	4.33336e-05
CUT135	bothEndsMapped	-20.4089	-4.33391	4.33391	3.39987e-06	-18.1798	0.0778582	-0.0778582	0.866662	-18.1915	0.347797	-0.347797	0.380459	-20.4008	4.23591	-4.23591	1.53207e-07	-20.3738	3.97796	-3.97796	9.74156e-07
CUT136	bothEndsMapped	-21.4347	-2.28229	2.28229	0.0524823	-20.1328	-0.110413	0.110413	0.878432	-19.9621	-0.205277	0.205277	0.663626	-21.3275	2.38255	-2.38255	0.0300936	-21.1234	2.47885	-2.47885	0.0149467
CUT137	bothEndsMapped	-34.5066	-31.0189	31.0189	1.82232e-06	-19.4515	1.10424	-1.10424	0.0201975	-18.8715	0.190974	-0.190974	0.646602	-35.0453	29.9414	-29.9414	0.000555406	-34.5004	31.0313	-31.0313	3.46082e-07
CUT138	mapped3	-34.8024	-30.4274	30.4274	5.17311e-05	-21.1626	3.38292	-3.38292	4.6033e-07	-19.8572	1.01836	-1.01836	0.0293063	-36.467	27.0982	-27.0982	0.323241	-35.2002	29.6318	-29.6318	0.00104969
CUT139	bothEndsMapped	-21.2782	-2.59513	2.59513	0.0192848	-19.6892	-0.36168	0.36168	0.439044	-19.5808	-0.331968	0.331968	0.485335	-21.0492	2.93918	-2.93918	0.00195285	-20.9014	2.92282	-2.92282	0.00114564
CUT140	bothEndsMapped	-34.7807	-30.4707	30.4707	3.42642e-05	-19.8048	0.718867	-0.718867	0.155356	-19.6143	0.584517	-0.584517	0.207758	-35.1231	29.7859	-29.7859	0.00162226	-34.9741	30.084	-30.084	4.88247e-05
CUT141	mappedNone	-37.0973	-25.8374	25.8374	0.572849	-37.0473	25.9375	-25.9375	0.261521	-36.9856	26.0609	-26.0609	0.261612	-50.0161	0	0	1	-50.0161	0	0	1
CUT142	bothEndsMapped	-19.6745	-2.63272	2.63272	0.000636587	-18.4597	0.395713	-0.395713	0.349444	-18.3034	0.329802	-0.329802	0.409119	-19.8281	2.21138	-2.21138	0.00138829	-19.6335	2.2888	-2.2888	0.000429053
CUT143	bothEndsMapped	-19.9997	-3.98225	3.98225	4.6012e-06	-17.8729	-0.093287	0.093287	0.843411	-17.7352	-0.121913	0.121913	0.773878	-19.9115	4.04465	-4.04465	4.15714e-08	-19.736	4.0837	-4.0837	6.1514e-09
CUT144	mapped3	-20.6662	-5.81922	5.81922	4.14511e-08	-17.7885	0.250984	-0.250984	0.525598	-17.6185	0.157651	-0.157651	0.700847	-20.7484	5.54059	-5.54059	2.00777e-09	-20.5402	5.64521	-5.64521	8.65858e-11
CUT145	bothEndsMapped	-22.7815	-1.58871	1.58871	0.316119	-21.4204	-0.916602	0.916602	0.192076	-21.4518	-0.60721	0.60721	0.351596	-22.2687	2.50006	-2.50006	0.0755163	-22.2661	2.19341	-2.19341	0.142771
CUT146	mapped5	-20.2304	-2.04691	2.04691	0.0129409	-19.3211	0.420828	-0.420828	0.340764	-19.3049	0.635238	-0.635238	0.152147	-20.3961	1.60136	-1.60136	0.0483848	-20.3434	1.39493	-1.39493	0.0660633
CUT147	mapped3	-33.8855	-32.2612	32.2612	2.50147e-09	-18.024	0.748621	-0.748621	0.0672014	-17.7759	0.499043	-0.499043	0.209836	-34.2406	31.5509	-31.5509	5.15408e-09	-34.0311	31.9699	-31.9699	1.97977e-10
CUT148	mapped3	-21.5748	-4.002	4.002	0.000508247	-19.0692	-0.813191	0.813191	0.0654235	-19.1796	-0.345596	0.345596	0.431223	-21.1206	4.79629	-4.79629	1.95372e-06	-21.1949	4.33574	-4.33574	9.0318e-06
CUT149	mapped5	-19.4583	-4.23512	4.23512	2.3271e-07	-17.623	0.775848	-0.775848	0.0497262	-17.4143	0.60488	-0.60488	0.11684	-19.7963	3.44494	-3.44494	9.20327e-07	-19.5488	3.62794	-3.62794	6.89263e-08
CUT150	bothEndsMapped	-33.8221	-32.388	32.388	1.08015e-09	-17.8746	0.675065	-0.675065	0.0862106	-17.8332	0.838974	-0.838974	0.036038	-34.1446	31.7428	-31.7428	8.45813e-10	-34.1464	31.7393	-31.7393	1.51663e-09
CUT151	bothEndsMapped	-19.5551	-4.04144	4.04144	9.06915e-07	-17.612	0.352817	-0.352817	0.360226	-17.1982	-0.228006	0.228006	0.567309	-19.6851	3.66729	-3.66729	9.83106e-08	-19.2328	4.26005	-4.26005	1.34867e-10
CUT152	mapped5	-35.3343	-29.3636	29.3636	0.00388256	-20.9104	0.759255	-0.759255	0.214677	-20.6506	0.485789	-0.485789	0.360719	-35.6826	28.667	-28.667	0.0187993	-35.4575	29.1172	-29.1172	0.0109414
CUT153	mapped5	-19.0171	-2.47354	2.47354	0.000656042	-18.0856	0.830662	-0.830662	0.0413716	-18.0819	1.06991	-1.06991	0.00811191	-19.3797	1.63432	-1.63432	0.00708029	-19.3393	1.40312	-1.40312	0.0207875
CUT154	mapped3	-22.7909	0.430106	-0.430106	0.744093	-22.8789	-0.0256455	0.0256455	1	-22.3625	-0.81197	0.81197	0.329802	-22.7227	-0.407891	0.407891	0.705313	-22.1724	0.380891	-0.380891	1
CUT155	mapped5	-18.1413	-3.4681	3.4681	7.91363e-07	-16.7489	0.927869	-0.927869	0.0153605	-16.7585	1.19346	-1.19346	0.00173816	-18.548	2.54057	-2.54057	4.34528e-06	-18.5178	2.28924	-2.28924	2.32877e-05
CUT156	mapped3	-21.3592	-2.43316	2.43316	0.0314473	-20.2261	0.378274	-0.378274	0.476953	-19.9716	0.115799	-0.115799	0.900384	-21.4995	2.03856	-2.03856	0.0468309	-21.2063	2.31311	-2.31311	0.0162861
CUT157	mapped5	-36.4938	-27.0445	27.0445	0.221984	-22.7256	-0.282787	0.282787	1	-22.3941	-0.699022	0.699022	0.534532	-36.3329	27.3662	-27.3662	0.192139	-36.032	27.968	-27.968	0.0447101
CUT158	bothEndsMapped	-21.758	-3.63563	3.63563	0.00323648	-20.3469	1.01953	-1.01953	0.0599039	-19.764	0.100529	-0.100529	0.867021	-22.2193	2.59883	-2.59883	0.079176	-21.597	3.5316	-3.5316	0.0018035
CUT159	bothEndsMapped	-35.9517	-28.1288	28.1288	0.0262834	-22.3292	1.04978	-1.04978	0.225213	-21.5202	-0.320666	0.320666	0.690874	-36.467	27.0982	-27.0982	0.323241	-35.7058	28.6205	-28.6205	0.0483076
CUT160	bothEndsMapped	-20.4013	-3.17907	3.17907	0.000438109	-18.6062	-0.210595	0.210595	0.637443	-18.7636	0.350939	-0.350939	0.427423	-20.2481	3.37129	-3.37129	1.99496e-05	-20.3708	2.81414	-2.81414	0.000297271
CUT161	mapped5	-36.719	-26.5942	26.5942	0.205111	-23.7566	0.858126	-0.858126	0.477228	-23.2885	0.168973	-0.168973	0.77136	-37.1314	25.7694	-25.7694	1	-36.7022	26.6276	-26.6276	0.322673
CUT162	mapped5	-21.4033	-2.34498	2.34498	0.0433041	-20.385	0.576586	-0.576586	0.342125	-19.9945	0.0413495	-0.0413495	1	-21.6258	1.78579	-1.78579	0.110924	-21.194	2.33762	-2.33762	0.0162861
CUT163	bothEndsMapped	-35.0755	-29.881	29.881	0.000616732	-19.9042	-0.275689	0.275689	0.68703	-19.9705	0.103873	-0.103873	0.852235	-34.9193	30.1935	-30.1935	0.000168248	-35.0299	29.9723	-29.9723	0.000111878
CUT164	bothEndsMapped	-21.8666	-3.41837	3.41837	0.00830768	-20.6656	1.21073	-1.21073	0.0299098	-20.2439	0.61411	-0.61411	0.222417	-22.4266	2.18437	-2.18437	0.210622	-21.9665	2.79255	-2.79255	0.0265497
CUT165	mapped5	-36.166	-27.7001	27.7001	0.0552824	-22.41	0.395243	-0.395243	0.824462	-21.9431	-0.291804	0.291804	0.86958	-36.3415	27.349	-27.349	0.192139	-35.9135	28.205	-28.205	0.14982
CUT166	mapped5	-35.2641	-29.5039	29.5039	0.00259632	-20.3194	-0.1695	0.1695	0.864934	-20.2305	-0.100732	0.100732	0.885528	-35.152	29.728	-29.728	0.00197937	-35.1109	29.8104	-29.8104	0.000301144
CUT167	bothEndsMapped	-19.9341	-2.63955	2.63955	0.001622	-18.7228	0.426599	-0.426599	0.333286	-18.3624	-0.0476612	0.0476612	0.923595	-20.099	2.19564	-2.19564	0.00204712	-19.699	2.68384	-2.68384	8.33484e-05
CUT168	bothEndsMapped	-21.2572	-4.63729	4.63729	2.39914e-05	-19.0723	0.453544	-0.453544	0.28403	-18.4853	-0.473673	0.473673	0.271628	-21.4389	4.15964	-4.15964	4.95538e-05	-20.8156	5.09436	-5.09436	2.90128e-08
CUT169	mapped3	-35.5278	-28.9764	28.9764	0.0147785	-21.567	1.24601	-1.24601	0.0567444	-20.8773	0.113639	-0.113639	0.920667	-36.1331	27.7658	-27.7658	0.120799	-35.4894	29.0534	-29.0534	0.0109414
CUT170	bothEndsMapped	-36.0665	-27.8991	27.8991	0.0627738	-21.5921	-0.820773	0.820773	0.269187	-21.7581	-0.242425	0.242425	0.759544	-35.6302	28.7718	-28.7718	0.00784961	-35.8414	28.3494	-28.3494	0.0655284
CUT171	mapped5	-34.9781	-30.0759	30.0759	0.000190969	-19.9641	0.253978	-0.253978	0.577553	-19.9694	0.511183	-0.511183	0.322422	-35.0817	29.8687	-29.8687	0.00111861	-35.1324	29.7673	-29.7673	0.00043075
CUT172	mapped3	-37.1171	-25.7979	25.7979	1	-24.1459	0.0794151	-0.0794151	1	-23.6703	-0.625299	0.625299	0.742407	-37.1314	25.7694	-25.7694	1	-36.6968	26.6385	-26.6385	0.322673
CUT173	bothEndsMapped	-19.1323	-2.54724	2.54724	0.000504129	-17.9788	0.457506	-0.457506	0.246764	-17.9187	0.583721	-0.583721	0.144085	-19.3085	2.0806	-2.0806	0.000627562	-19.2128	1.9602	-1.9602	0.00105468
CUT174	mapped3	-21.475	-1.03167	1.03167	0.439161	-20.8911	0.089366	-0.089366	0.91087	-21.0698	0.693153	-0.693153	0.268171	-21.4659	0.935819	-0.935819	0.402172	-21.6086	0.338418	-0.338418	1
CUT175	bothEndsMapped	-18.9014	-1.73411	1.73411	0.0113606	-17.9533	0.0486419	-0.0486419	0.917017	-17.7241	-0.163195	0.163195	0.691545	-18.877	1.66873	-1.66873	0.00273479	-18.608	1.89501	-1.89501	0.000395193
CUT176	mapped3	-35.0209	-29.9903	29.9903	0.000376941	-20.41	1.01639	-1.01639	0.0631039	-19.2864	-0.984698	0.984698	0.0205275	-35.5001	29.032	-29.032	0.00544446	-34.4151	31.2019	-31.2019	8.22091e-08
CUT177	bothEndsMapped	-22.5333	-2.08506	2.08506	0.13483	-21.0798	-0.597006	0.597006	0.329353	-21.0105	-0.489037	0.489037	0.446607	-22.1822	2.67316	-2.67316	0.0558355	-22.0703	2.58501	-2.58501	0.0625699
CUT178	bothEndsMapped	-22.0917	-2.96831	2.96831	0.0300666	-20.8473	0.687524	-0.687524	0.281806	-20.3907	0.0209574	-0.0209574	1	-22.3851	2.2672	-2.2672	0.210622	-21.8943	2.9371	-2.9371	0.0106284
CUT179	bothEndsMapped	-35.6965	-28.6391	28.6391	0.0477971	-20.9921	-0.56547	0.56547	0.417267	-20.866	-0.570882	0.570882	0.323524	-35.3953	29.2414	-29.2414	0.00273307	-35.3091	29.414	-29.414	0.00270927
CUT180	mapped3	-33.7541	-32.5239	32.5239	3.80572e-10	-17.6345	0.46691	-0.46691	0.232559	-17.317	0.0786336	-0.0786336	0.856086	-33.9741	32.084	-32.084	2.64193e-11	-33.6971	32.6379	-32.6379	6.32666e-14
CUT181	mapped3	-18.0315	-4.16966	4.16966	1.01748e-08	-16.5239	1.38181	-1.38181	0.000308523	-15.7539	0.0882697	-0.0882697	0.8152	-18.6689	2.78082	-2.78082	7.12764e-07	-17.8601	4.08663	-4.08663	6.23984e-14
CUT182	mapped3	-20.6742	-0.18847	0.18847	0.907756	-20.1507	-0.678807	0.678807	0.227343	-20.4606	0.187888	-0.187888	0.745197	-20.2911	0.840526	-0.840526	0.266315	-20.568	-0.0251722	0.0251722	1
CUT183	bothEndsMapped	-19.3114	-2.52876	2.52876	0.000726687	-17.9692	0.0604768	-0.0604768	0.8828	-17.8828	0.134152	-0.134152	0.765409	-19.2906	2.45632	-2.45632	8.38831e-05	-19.1675	2.39063	-2.39063	5.19139e-05
CUT184	mappedNone	-35.4264	-29.1793	29.1793	0.00932655	-20.7217	-0.0579623	0.0579623	1	-20.2763	-0.701448	0.701448	0.222417	-35.3887	29.2547	-29.2547	0.00273307	-34.9785	30.075	-30.075	6.69963e-05
CUT185	mapped3	-37.1268	-25.7785	25.7785	1	-37.068	25.8962	-25.8962	0.507681	-24.031	0.0684696	-0.0684696	1	-50.0161	0	0	1	-37.0551	25.922	-25.922	0.564576
CUT186	bothEndsMapped	-34.8335	-30.3652	30.3652	5.04274e-05	-19.532	-0.0511238	0.0511238	0.956624	-19.3841	-0.100038	0.100038	0.824404	-34.791	30.4501	-30.4501	4.84806e-05	-34.6887	30.6546	-30.6546	6.68908e-06
CUT187	mapped3	-35.4249	-29.1823	29.1823	0.00932655	-20.9551	0.434687	-0.434687	0.494154	-20.5085	-0.211625	0.211625	0.73979	-35.6265	28.779	-28.779	0.00784961	-35.2248	29.5826	-29.5826	0.00104969
CUT188	bothEndsMapped	-19.7213	-4.53911	4.53911	1.08159e-07	-17.5456	0.405788	-0.405788	0.300739	-17.4741	0.509266	-0.509266	0.193831	-19.8733	4.12088	-4.12088	2.69706e-08	-19.7628	4.0301	-4.0301	1.14973e-08
CUT189	mapped3	-20.3903	-4.37099	4.37099	6.29349e-06	-18.333	0.477854	-0.477854	0.24803	-17.9747	0.0077807	-0.0077807	1	-20.5768	3.88396	-3.88396	3.51802e-06	-20.1799	4.36592	-4.36592	2.34635e-08
CUT190	mapped5	-22.3653	-2.42104	2.42104	0.147437	-20.7629	-0.593009	0.593009	0.354077	-21.5076	1.1434	-1.1434	0.091997	-22.0253	2.98681	-2.98681	0.0215186	-22.7329	1.25986	-1.25986	0.551865
CUT191	bothEndsMapped	-19.8922	-1.75251	1.75251	0.0311346	-18.4959	-0.847134	0.847134	0.0436598	-18.4853	-0.621699	0.621699	0.132304	-19.4236	2.57551	-2.57551	4.15177e-05	-19.3764	2.35813	-2.35813	0.00014021
CUT192	mapped5	-35.9478	-28.1366	28.1366	0.0262834	-21.5795	-0.387251	0.387251	0.63786	-21.6374	-0.0248505	0.0248505	1	-35.7309	28.5703	-28.5703	0.0187993	-35.8265	28.3791	-28.3791	0.0985698
CUT193	mapped3	-23.8871	0.62267	-0.62267	0.62031	-24.6364	1.08783	-1.08783	0.636263	-24.8191	1.70002	-1.70002	0.636351	-24.3808	-1.72409	1.72409	0.552398	-24.5276	-2.32965	2.32965	0.262239
CUT194	bothEndsMapped	-35.0526	-29.927	29.927	0.000616732	-19.7035	-0.548258	0.548258	0.256692	-19.6753	-0.358183	0.358183	0.455898	-34.7541	30.524	-30.524	1.89422e-05	-34.7642	30.5037	-30.5037	2.92523e-05
CUT195	mapped3	-35.9732	-28.0858	28.0858	0.0262834	-21.616	-0.440753	0.440753	0.63786	-21.4096	-0.606396	0.606396	0.369502	-35.7346	28.5628	-28.5628	0.0187993	-35.5762	28.8797	-28.8797	0.014625
CUT196	mapped5	-35.2255	-29.5812	29.5812	0.00152273	-20.3084	-0.0681975	0.0681975	0.934436	-20.2603	0.0827255	-0.0827255	0.883342	-35.181	29.6701	-29.6701	0.00197937	-35.1646	29.7029	-29.7029	0.000731108
CUT197	bothEndsMapped	-18.5402	-1.89631	1.89631	0.00514059	-17.4379	-0.085554	0.085554	0.834387	-17.3997	0.0845643	-0.0845643	0.837041	-18.4451	1.97235	-1.97235	0.000176774	-18.3676	1.81557	-1.81557	0.00045238
CUT198	mapped5	-35.0089	-30.0143	30.0143	0.000298187	-20.0686	0.33372	-0.33372	0.511384	-19.6842	-0.188407	0.188407	0.711662	-35.1565	29.7192	-29.7192	0.00197937	-34.814	30.4041	-30.4041	4.33336e-05
CUT199	bothEndsMapped	-34.6689	-30.6943	30.6943	7.97047e-06	-19.2601	0.0580962	-0.0580962	0.926166	-19.0535	-0.108375	0.108375	0.855102	-34.6864	30.6593	-30.6593	9.34448e-06	-34.5169	30.9983	-30.9983	5.64192e-07
CUT200	bothEndsMapped	-19.1278	-2.89601	2.89601	8.53502e-05	-17.9238	0.707946	-0.707946	0.0769903	-17.6357	0.378391	-0.378391	0.330773	-19.4303	2.17689	-2.17689	0.000584024	-19.103	2.51962	-2.51962	2.02183e-05
CUT201	mapped3	-35.9945	-28.0431	28.0431	0.0401085	-22.349	0.961674	-0.961674	0.421635	-21.3855	-0.718597	0.718597	0.313178	-36.4581	27.1159	-27.1159	0.192139	-35.5319	28.9684	-28.9684	0.0164038
CUT202	mappedNone	-19.6326	-1.24255	1.24255	0.110759	-19.0702	0.325968	-0.325968	0.482512	-18.8757	0.183584	-0.183584	0.694393	-19.7477	0.898315	-0.898315	0.194132	-19.5166	1.04867	-1.04867	0.0881732
CUT203	mapped3	-19.6443	-1.52307	1.52307	0.0430418	-19.011	0.478852	-0.478852	0.283099	-18.482	-0.332625	0.332625	0.409754	-19.8297	1.03817	-1.03817	0.123139	-19.2634	1.8589	-1.8589	0.00251972
CUT204	bothEndsMapped	-19.6824	-2.61698	2.61698	0.000764041	-18.1859	-0.1813	0.1813	0.681464	-18.1146	-0.0772826	0.0772826	0.870399	-19.5466	2.77436	-2.77436	2.7326e-05	-19.4366	2.68256	-2.68256	3.66371e-05
CUT205	mapped3	-35.9874	-28.0573	28.0573	0.0401085	-21.4502	-0.814681	0.814681	0.257131	-21.4052	-0.65782	0.65782	0.369502	-35.5663	28.8994	-28.8994	0.00863981	-35.5518	28.9285	-28.9285	0.014625
CUT206	bothEndsMapped	-20.6409	-2.6998	2.6998	0.00484526	-19.4275	0.487703	-0.487703	0.310256	-19.1786	0.236343	-0.236343	0.607644	-20.8378	2.19188	-2.19188	0.0102969	-20.5481	2.45942	-2.45942	0.00342886
CUT207	bothEndsMapped	-21.6241	-1.90351	1.90351	0.085206	-20.6851	0.226142	-0.226142	0.685573	-20.2858	-0.325763	0.325763	0.556682	-21.6889	1.6597	-1.6597	0.144557	-21.255	2.21556	-2.21556	0.0196876
CUT208	mapped3	-35.635	28.7622	-28.7622	0.00115767	-37.5914	-24.8492	24.8492	1	-37.3377	-25.3567	25.3567	0.507742	-23.2151	-4.03649	4.03649	0.00950269	-22.8633	-3.64476	3.64476	0.012064
CUT209	mapped5	-35.7595	-28.5131	28.5131	0.0675844	-21.2612	-0.252713	0.252713	0.690443	-20.791	-0.946856	0.946856	0.0885859	-35.6119	28.8083	-28.8083	0.00784961	-35.174	29.6841	-29.6841	0.000731108
CUT210	mapped5	-35.389	-29.254	29.254	0.00688484	-20.3282	-0.685995	0.685995	0.241367	-20.441	-0.213196	0.213196	0.750377	-35.0278	29.9765	-29.9765	0.000555406	-35.1868	29.6584	-29.6584	0.000731108
CUT211	bothEndsMapped	-20.7486	-2.48457	2.48457	0.0114075	-19.7349	0.682386	-0.682386	0.168646	-19.6828	0.824753	-0.824753	0.0860672	-21.0379	1.79177	-1.79177	0.0694401	-20.9484	1.65885	-1.65885	0.0664192
CUT212	mapped3	-36.8847	-26.2627	26.2627	0.335543	-23.2612	-0.79025	0.79025	0.771234	-24.1128	1.15993	-1.15993	0.47741	-36.4713	27.0894	-27.0894	0.323241	-37.3624	25.3074	-25.3074	1
CUT213	bothEndsMapped	-34.9998	-30.0326	30.0326	0.000237726	-19.6803	-0.423081	0.423081	0.408066	-19.7516	-0.0334996	0.0334996	1	-34.7748	30.4826	-30.4826	3.50316e-05	-34.8906	30.2509	-30.2509	8.90459e-05
CUT214	mapped3	-35.8437	-28.3447	28.3447	0.0176816	-21.8653	0.627223	-0.627223	0.603226	-21.1565	-0.544159	0.544159	0.361885	-36.129	27.7741	-27.7741	0.120799	-35.464	29.1042	-29.1042	0.00740752
CUT215	bothEndsMapped	-35.6539	-28.7243	28.7243	0.0248723	-22.1823	1.97696	-1.97696	0.0197629	-21.5262	0.911564	-0.911564	0.172605	-36.626	26.78	-26.78	0.564941	-36.0085	28.0151	-28.0151	0.0498917
CUT216	bothEndsMapped	-21.2816	-2.58834	2.58834	0.0192848	-19.929	0.106905	-0.106905	0.891352	-19.7162	-0.0721572	0.0721572	0.870707	-21.2812	2.4751	-2.4751	0.0246146	-21.0325	2.66068	-2.66068	0.00619683
CUT217	bothEndsMapped	-35.0757	-29.8808	29.8808	0.000511929	-20.0809	0.0996264	-0.0996264	0.823715	-20.016	0.216568	-0.216568	0.653124	-35.1016	29.8288	-29.8288	0.00162226	-35.0799	29.8723	-29.8723	0.000213483
CUT218	bothEndsMapped	-35.2892	-29.4536	29.4536	0.00344231	-20.8502	0.764898	-0.764898	0.242797	-20.3434	-0.00191623	0.00191623	1	-35.6604	28.7114	-28.7114	0.0119756	-35.1902	29.6518	-29.6518	0.000731108
CUT219	mapped3	-22.5787	-1.99425	1.99425	0.180995	-21.2772	-0.413293	0.413293	0.588082	-20.7707	-1.17936	1.17936	0.0464066	-22.3285	2.38048	-2.38048	0.10551	-21.7821	3.16143	-3.16143	0.0134447
CUT220	bothEndsMapped	-34.7296	-30.5729	30.5729	1.60165e-05	-19.2797	-0.105323	0.105323	0.849428	-19.4579	0.497552	-0.497552	0.288521	-34.6503	30.7316	-30.7316	5.25855e-06	-34.8721	30.2878	-30.2878	8.90459e-05
CUT221	mapped3	-16.8814	-5.57501	5.57501	8.9926e-14	-14.1959	0.409582	-0.409582	0.263082	-13.9099	0.0840322	-0.0840322	0.819071	-17.0382	5.14734	-5.14734	1.17502e-20	-16.713	5.48581	-5.48581	8.74408e-24
CUT222	mapped3	-18.7706	-7.61032	7.61032	3.20057e-16	-15.2224	0.722057	-0.722057	0.0510627	-14.8017	0.127167	-0.127167	0.729907	-19.0831	6.8713	-6.8713	1.03678e-20	-18.6234	7.47884	-7.47884	1.39619e-25
CUT223	mapped3	-34.6055	-30.821	30.821	4.9463e-06	-19.3768	0.60087	-0.60087	0.20303	-19.009	0.111434	-0.111434	0.857717	-34.8815	30.2691	-30.2691	0.000103426	-34.5533	30.9256	-30.9256	5.92952e-07
CUT224	mapped3	-37.9011	-24.2298	24.2298	1	-37.8477	24.3368	-24.3368	1	-37.786	24.4601	-24.4601	1	-50.0161	0	0	1	-50.0161	0	0	1
CUT225	bothEndsMapped	-34.8387	-30.3548	30.3548	6.18285e-05	-20.0874	1.0573	-1.0573	0.047687	-19.6072	0.343662	-0.343662	0.479683	-35.3516	29.329	-29.329	0.00174377	-34.91	30.2122	-30.2122	0.00015963
CUT226	mapped5	-33.7766	-32.4788	32.4788	6.28679e-10	-17.7858	0.667815	-0.667815	0.087361	-16.9702	-0.716721	0.716721	0.0644975	-34.0983	31.8355	-31.8355	3.32261e-10	-33.3233	33.3856	-33.3856	1.99136e-17
CUT227	mapped5	-36.3518	-27.3286	27.3286	0.221984	-23.8642	2.6052	-2.6052	0.209224	-22.4714	0.065666	-0.065666	1	-37.6247	24.7828	-24.7828	1	-36.2708	27.4905	-27.4905	0.120129
CUT228	bothEndsMapped	-20.259	-4.63363	4.63363	1.15449e-06	-18.04	0.422944	-0.422944	0.293043	-17.8838	0.356862	-0.356862	0.369334	-20.4168	4.20387	-4.20387	2.22636e-07	-20.221	4.28354	-4.28354	5.81262e-08
CUT229	bothEndsMapped	-18.1804	-3.38995	3.38995	1.27943e-06	-16.6933	0.648005	-0.648005	0.0886682	-16.1077	-0.276862	0.276862	0.456247	-18.4496	2.7373	-2.7373	5.521e-07	-17.8253	3.67411	-3.67411	5.02008e-12
CUT230	bothEndsMapped	-34.7773	-30.4776	30.4776	3.42642e-05	-19.4846	0.128734	-0.128734	0.831217	-19.6366	0.679044	-0.679044	0.167558	-34.8112	30.4097	-30.4097	4.04887e-05	-35.0079	30.0162	-30.0162	9.31349e-05
CUT231	bothEndsMapped	-19.4861	-2.56474	2.56474	0.000744001	-18.1061	0.0196452	-0.0196452	0.981642	-17.9193	-0.107437	0.107437	0.786813	-19.4461	2.53052	-2.53052	5.10833e-05	-19.221	2.66882	-2.66882	1.5226e-05
CUT232	bothEndsMapped	-20.0678	-5.01607	5.01607	9.97879e-08	-17.5546	0.18742	-0.18742	0.629254	-17.4308	0.186431	-0.186431	0.647754	-20.1141	4.80928	-4.80928	5.07755e-10	-19.9541	4.81739	-4.81739	4.19502e-10
CUT233	mapped3	-34.9038	-30.2246	30.2246	0.000117732	-20.0108	0.659679	-0.659679	0.207619	-19.2654	-0.584774	0.584774	0.187531	-35.2082	29.6157	-29.6157	0.00415315	-34.5055	31.0211	-31.0211	3.46082e-07
CUT234	bothEndsMapped	-35.9732	-28.0858	28.0858	0.0262834	-21.6676	-0.337405	0.337405	0.74818	-22.2764	1.12725	-1.12725	0.196356	-35.7867	28.4588	-28.4588	0.0303834	-36.4425	27.1471	-27.1471	0.205719
CUT235	mappedNone	-36.0301	-27.9718	27.9718	0.0401085	-21.5698	-0.75754	0.75754	0.355711	-21.3693	-0.91153	0.91153	0.17103	-35.6338	28.7645	-28.7645	0.0119756	-35.4757	29.0807	-29.0807	0.0109414
CUT236	mapped3	-21.2992	-1.38335	1.38335	0.186208	-19.8927	-1.22164	1.22164	0.0144647	-20.1678	-0.424782	0.424782	0.403767	-20.6374	2.59271	-2.59271	0.00183881	-20.8799	1.79582	-1.79582	0.035529
CUT237	mapped3	-20.1816	-1.61844	1.61844	0.0572401	-19.2446	-0.040751	0.040751	0.963261	-19.1235	-0.036503	0.036503	0.93924	-20.1093	1.64887	-1.64887	0.0200785	-19.9534	1.64892	-1.64892	0.0150132
CUT238	bothEndsMapped	-19.8598	-3.43194	3.43194	3.55008e-05	-18.1524	0.186559	-0.186559	0.620486	-17.9195	-0.0324463	0.0324463	0.95707	-19.9119	3.21369	-3.21369	5.78512e-06	-19.6442	3.43725	-3.43725	3.8199e-07
CUT239	mapped5	-21.8432	-3.46529	3.46529	0.00665138	-20.0409	0.0919541	-0.0919541	1	-20.2825	0.821441	-0.821441	0.109277	-21.8423	3.35279	-3.35279	0.00356902	-22.0407	2.64415	-2.64415	0.0335461
CUT240	bothEndsMapped	-21.4308	-4.29001	4.29001	0.000170415	-19.0315	-0.30076	0.30076	0.49158	-19.1478	0.178316	-0.178316	0.727654	-21.2334	4.57075	-4.57075	9.07612e-06	-21.3136	4.0984	-4.0984	4.34428e-05
CUT241	bothEndsMapped	-20.5606	-6.03037	6.03037	1.08986e-08	-17.417	-0.0677965	0.0677965	0.883036	-17.1958	-0.263574	0.263574	0.50257	-20.4819	6.07358	-6.07358	6.734e-12	-20.2232	6.2793	-6.2793	1.43695e-13
CUT242	bothEndsMapped	-35.2847	-29.4626	29.4626	0.00344231	-20.5338	0.146239	-0.146239	0.781666	-20.8476	1.02094	-1.02094	0.0681315	-35.3418	29.3485	-29.3485	0.00174377	-35.6968	28.6384	-28.6384	0.0483076
CUT243	bothEndsMapped	-34.0091	-32.014	32.014	1.51457e-08	-18.2872	0.798939	-0.798939	0.0517536	-18.2796	1.03022	-1.03022	0.0109661	-34.3832	31.2658	-31.2658	6.36045e-08	-34.4131	31.2058	-31.2058	8.22091e-08
CUT244	bothEndsMapped	-22.1381	-2.87547	2.87547	0.0486518	-20.692	0.19556	-0.19556	0.83967	-20.5366	0.131384	-0.131384	0.865212	-22.1855	2.66643	-2.66643	0.0558355	-21.9952	2.73515	-2.73515	0.0248407
CUT245	bothEndsMapped	-36.1965	-27.6391	27.6391	0.0851333	-21.9896	-0.535274	0.535274	0.450198	-22.9194	1.57047	-1.57047	0.0848039	-35.9003	28.2316	-28.2316	0.0451569	-36.8666	26.2989	-26.2989	0.564576
CUT246	bothEndsMapped	-18.1945	-2.76258	2.76258	4.5576e-05	-16.8432	0.274913	-0.274913	0.468885	-16.2677	-0.629668	0.629668	0.0920709	-18.2814	2.47465	-2.47465	2.62452e-06	-17.667	3.39157	-3.39157	6.52913e-11
CUT247	mapped3	-23.6739	0.196177	-0.196177	0.679723	-23.9257	0.512969	-0.512969	0.701273	-24.1024	1.11321	-1.11321	0.701377	-23.881	-0.724478	0.724478	1	-24.024	-1.32245	1.32245	0.612956
CUT248	bothEndsMapped	-35.6131	-28.8058	28.8058	0.0282106	-21.1697	0.10676	-0.10676	1	-21.0368	0.0880134	-0.0880134	0.913662	-35.6566	28.7188	-28.7188	0.00784961	-35.5596	28.9128	-28.9128	0.014625
CUT249	bothEndsMapped	-35.1056	-29.821	29.821	0.00064935	-20.1414	0.101607	-0.101607	0.8167	-20.0657	0.196657	-0.196657	0.744175	-35.1307	29.7706	-29.7706	0.00139891	-35.1066	29.8189	-29.8189	0.000213483
CUT250	bothEndsMapped	-20.8926	-3.36636	3.36636	0.000650263	-19.0888	-0.0281361	0.0281361	1	-19.3011	0.642992	-0.642992	0.152147	-20.827	3.38347	-3.38347	0.000188269	-21.0044	2.71686	-2.71686	0.00388006
CUT251	mapped5	-35.2718	-29.4885	29.4885	0.00259632	-20.4045	-0.0548221	0.0548221	1	-20.1423	-0.332351	0.332351	0.542686	-35.2326	29.567	-29.567	0.00061325	-35.0079	30.0162	-30.0162	9.31349e-05
CUT252	bothEndsMapped	-34.5276	-30.9769	30.9769	1.68576e-06	-18.9543	0.0216865	-0.0216865	0.969058	-18.8259	0.0116149	-0.0116149	1	-34.5205	30.9912	-30.9912	6.56007e-07	-34.4354	31.1612	-31.1612	8.41763e-08
CUT253	mapped3	-37.4156	-25.2009	25.2009	1	-24.1335	-1.13204	1.13204	0.393772	-23.8235	-1.50565	1.50565	0.318412	-36.827	26.3781	-26.3781	0.564941	-36.5567	26.9187	-26.9187	0.191544
CUT254	mapped3	-35.0849	-29.8623	29.8623	0.000511929	-19.744	-0.614955	0.614955	0.202318	-19.7369	-0.38262	0.38262	0.443256	-34.7609	30.5104	-30.5104	1.89422e-05	-34.7907	30.4508	-30.4508	2.51437e-05
CUT255	bothEndsMapped	-36.1506	-27.731	27.731	0.0552824	-22.6677	0.956085	-0.956085	0.353335	-22.2922	0.451932	-0.451932	0.56047	-36.617	26.7981	-26.7981	0.323241	-36.2759	27.4804	-27.4804	0.120129
CUT256	mapped3	-36.3358	-27.3605	27.3605	0.135458	-22.2705	-0.535801	0.535801	0.534163	-21.6067	-1.61706	1.61706	0.0120935	-36.0416	27.9488	-27.9488	0.0726459	-35.424	29.1841	-29.1841	0.00509791
CUT257	mapped3	-35.3777	-29.2767	29.2767	0.00688484	-20.6577	0.0473923	-0.0473923	0.92052	-20.2903	-0.4408	0.4408	0.413804	-35.3778	29.2766	-29.2766	0.00273307	-35.0523	29.9276	-29.9276	0.000153482
CUT258	mapped3	-22.1299	-0.891918	0.891918	0.671345	-21.9683	0.773978	-0.773978	0.38484	-21.0727	-0.770587	0.770587	0.229699	-22.4707	0.0961583	-0.0961583	1	-21.5341	1.65743	-1.65743	0.17161
CUT259	bothEndsMapped	-35.5854	-28.8613	28.8613	0.0282106	-20.3713	-1.37618	1.37618	0.0119342	-20.8961	-0.0795373	0.0795373	1	-34.884	30.2641	-30.2641	0.000144994	-35.4378	29.1564	-29.1564	0.0109414
CUT260	mapped3	-19.1645	-4.17879	4.17879	1.57024e-07	-17.0366	0.147117	-0.147117	0.713849	-16.9666	0.253616	-0.253616	0.51256	-19.1852	4.02322	-4.02322	5.75503e-10	-19.0764	3.92901	-3.92901	6.75583e-10
CUT261	mappedNone	-34.9638	-30.1046	30.1046	0.000230778	-19.9501	0.282028	-0.282028	0.534488	-19.655	-0.0613755	0.0613755	0.916503	-35.0817	29.8687	-29.8687	0.00111861	-34.8331	30.3658	-30.3658	5.77146e-05
CUT262	mapped3	-37.3953	-25.2415	25.2415	1	-24.9258	0.509102	-0.509102	1	-24.3308	-0.433921	0.433921	1	-37.6294	24.7732	-24.7732	1	-37.0721	25.888	-25.888	1
CUT263	mapped3	-20.779	-2.42363	2.42363	0.0122505	-19.4958	0.0714058	-0.0714058	0.915142	-19.356	0.0383763	-0.0383763	0.965008	-20.7646	2.33833	-2.33833	0.00671923	-20.5871	2.38147	-2.38147	0.0047832
CUT264	bothEndsMapped	-21.7207	0.289861	-0.289861	0.682814	-21.3865	-0.752661	0.752661	0.332048	-21.4237	-0.431558	0.431558	0.602541	-21.2959	0.445642	-0.445642	0.840586	-21.2965	0.132704	-0.132704	1
CUT265	bothEndsMapped	-19.83	-1.15178	1.15178	0.148433	-19.5406	0.785894	-0.785894	0.0970671	-18.9354	-0.177979	0.177979	0.70588	-20.1727	0.352322	-0.352322	0.713114	-19.5267	1.33235	-1.33235	0.0396024
CUT266	mapped5	-22.5272	-2.09731	2.09731	0.13483	-21.035	-0.667925	0.667925	0.280014	-20.9063	-0.678732	0.678732	0.222401	-22.1434	2.75076	-2.75076	0.0397389	-21.9807	2.76419	-2.76419	0.0265497
CUT267	bothEndsMapped	-20.5443	-2.89313	2.89313	0.00192827	-19.2452	0.522506	-0.522506	0.252503	-19.0127	0.30389	-0.30389	0.519912	-20.7499	2.36781	-2.36781	0.00524224	-20.4842	2.58734	-2.58734	0.00109054
CUT268	bothEndsMapped	-20.9887	-3.17415	3.17415	0.00169757	-19.7732	0.9388	-0.9388	0.0463229	-19.4364	0.51182	-0.51182	0.253835	-21.4107	2.21601	-2.21601	0.0274236	-21.0378	2.65008	-2.65008	0.00619683
CUT269	bothEndsMapped	-22.0825	-2.98671	2.98671	0.0300666	-20.3106	-0.373545	0.373545	0.617384	-20.183	-0.381764	0.381764	0.486987	-21.8502	3.33714	-3.33714	0.00450758	-21.6923	3.34094	-3.34094	0.00533659
CUT270	bothEndsMapped	-20.3657	-3.25023	3.25023	0.000268848	-18.8766	0.455076	-0.455076	0.271716	-18.7069	0.362369	-0.362369	0.392102	-20.55	2.76763	-2.76763	0.000489584	-20.345	2.86573	-2.86573	0.000165981
CUT271	bothEndsMapped	-36.052	-27.9281	27.9281	0.0627738	-21.6492	-0.663638	0.663638	0.431652	-21.3613	-0.99283	0.99283	0.141531	-35.7045	28.6231	-28.6231	0.0119756	-35.4561	29.1199	-29.1199	0.00740752
CUT272	bothEndsMapped	-35.2762	-29.4796	29.4796	0.00344231	-20.9124	0.946949	-0.946949	0.098703	-20.428	0.224989	-0.224989	0.750377	-35.7309	28.5703	-28.5703	0.0187993	-35.2964	29.4393	-29.4393	0.00132198
CUT273	mapped5	-22.2063	-2.7391	2.7391	0.0576069	-20.2254	-1.05058	1.05058	0.062358	-20.1809	-0.892227	0.892227	0.0930591	-21.6378	3.76197	-3.76197	0.000698361	-21.564	3.59766	-3.59766	0.00115961
CUT274	mapped3	-21.7427	-3.66629	3.66629	0.00263306	-20.7118	1.81785	-1.81785	0.00122752	-19.773	0.186727	-0.186727	0.780143	-22.5981	1.84122	-1.84122	0.397582	-21.63	3.46559	-3.46559	0.0023398
CUT275	mapped5	-35.6656	-28.7008	28.7008	0.0342382	-20.7927	-0.838312	0.838312	0.166321	-20.63	-0.916925	0.916925	0.0853653	-35.2263	29.5796	-29.5796	0.00415315	-35.1098	29.8125	-29.8125	0.000301144
CUT276	mapped3	-35.0089	-30.0143	30.0143	0.000298187	-20.3139	0.82425	-0.82425	0.122033	-19.5993	-0.358189	0.358189	0.451665	-35.402	29.2281	-29.2281	0.00273307	-34.7304	30.5713	-30.5713	9.80386e-06
CUT277	bothEndsMapped	-34.8165	-30.399	30.399	5.04274e-05	-19.8244	0.653423	-0.653423	0.180739	-19.6137	0.478115	-0.478115	0.333416	-35.1101	29.8119	-29.8119	0.00139891	-34.9436	30.1449	-30.1449	3.6038e-05
CUT278	bothEndsMapped	-19.5511	-1.70957	1.70957	0.0197715	-18.435	-0.319498	0.319498	0.463203	-18.4817	0.0206157	-0.0206157	1	-19.3428	2.01206	-2.01206	0.00104811	-19.3552	1.67529	-1.67529	0.00491978
CUT279	mapped3	-35.083	-29.8662	29.8662	0.000616732	-19.7157	-0.700221	0.700221	0.175267	-19.7842	-0.316107	0.316107	0.544435	-34.7229	30.5862	-30.5862	1.7331e-05	-34.8353	30.3615	-30.3615	4.33336e-05
CUT280	bothEndsMapped	-19.8298	-2.84812	2.84812	0.000525352	-18.3457	0.095951	-0.095951	0.809844	-18.2703	0.191627	-0.191627	0.635656	-19.8261	2.74135	-2.74135	4.65008e-05	-19.7125	2.65684	-2.65684	0.000130261
CUT281	bothEndsMapped	-36.4178	-27.1965	27.1965	0.221984	-22.2077	-0.992251	0.992251	0.225213	-22.1143	-0.93257	0.93257	0.283279	-35.8963	28.2395	-28.2395	0.0451569	-35.8354	28.3614	-28.3614	0.0985698
CUT282	mapped3	-36.1813	-27.6695	27.6695	0.0851333	-21.6801	-1.10956	1.10956	0.153375	-21.6065	-1.01041	1.01041	0.12496	-35.5986	28.835	-28.835	0.00784961	-35.5677	28.8966	-28.8966	0.014625
CUT283	bothEndsMapped	-19.9323	-1.28704	1.28704	0.10408	-19.2687	0.147113	-0.147113	0.744121	-18.8672	-0.409025	0.409025	0.346909	-19.9625	1.11256	-1.11256	0.129243	-19.5244	1.67689	-1.67689	0.00686159
CUT284	bothEndsMapped	-21.1615	-0.828548	0.828548	0.504163	-20.3706	-0.520868	0.520868	0.342125	-20.5093	0.00287805	-0.00287805	1	-20.8445	1.34843	-1.34843	0.133244	-20.943	0.839718	-0.839718	0.370446
CUT285	bothEndsMapped	-20.8941	-5.36335	5.36335	8.23687e-07	-18.2319	0.26254	-0.26254	0.535783	-18.3182	0.681657	-0.681657	0.0922964	-20.9726	5.09235	-5.09235	1.35537e-07	-21.0188	4.68799	-4.68799	1.82635e-06
CUT286	mapped3	-34.7023	-30.6275	30.6275	1.64519e-05	-19.7214	0.913937	-0.913937	0.0498402	-19.2635	0.244318	-0.244318	0.615887	-35.125	29.782	-29.782	0.00139891	-34.7109	30.6103	-30.6103	1.15852e-05
CUT287	mapped3	-35.6833	-28.6656	28.6656	0.0477971	-21.8028	1.12797	-1.12797	0.194736	-21.5909	0.950657	-0.950657	0.211393	-36.2236	27.585	-27.585	0.206438	-36.0546	27.9228	-27.9228	0.0447101
CUT288	bothEndsMapped	-21.5691	-4.01352	4.01352	0.000508247	-19.3785	-0.168615	0.168615	0.764671	-19.1852	-0.308547	0.308547	0.501624	-21.4368	4.16394	-4.16394	4.95538e-05	-21.2085	4.30862	-4.30862	1.13457e-05
CUT289	mapped3	-37.9011	-24.2298	24.2298	1	-37.8477	24.3368	-24.3368	1	-37.786	24.4601	-24.4601	1	-50.0161	0	0	1	-50.0161	0	0	1
CUT290	mapped3	-35.6304	-28.7713	28.7713	0.0248723	-21.499	0.712246	-0.712246	0.312188	-21.1014	0.163897	-0.163897	1	-35.9674	28.0974	-28.0974	0.0726459	-35.6207	28.7907	-28.7907	0.014625
CUT291	mapped5	-22.4573	-2.23708	2.23708	0.106968	-20.5237	-1.4124	1.4124	0.0121706	-20.4959	-1.22135	1.22135	0.0257932	-21.6974	3.64273	-3.64273	0.00112356	-21.631	3.46363	-3.46363	0.00305847
CUT292	mapped3	-21.7198	-1.71202	1.71202	0.156804	-20.9762	0.429789	-0.429789	0.562954	-21.1199	0.963874	-0.963874	0.118855	-21.8851	1.2672	-1.2672	0.343527	-21.991	0.743599	-0.743599	0.637798
CUT293	mapped5	-22.4764	-0.198858	0.198858	1	-21.7427	-1.0291	1.0291	0.172452	-21.6567	-0.954763	0.954763	0.192673	-21.8995	1.23839	-1.23839	0.343527	-21.7784	1.16883	-1.16883	0.400066
CUT294	bothEndsMapped	-33.9511	-32.1299	32.1299	7.86788e-09	-18.0731	0.590555	-0.590555	0.149521	-18.0748	0.840575	-0.840575	0.0370043	-34.2241	31.5838	-31.5838	3.37177e-09	-34.2658	31.5005	-31.5005	1.95747e-08
CUT295	mapped3	-20.2945	-4.56256	4.56256	2.00341e-06	-18.4048	1.01145	-1.01145	0.0161816	-18.1037	0.655785	-0.655785	0.104548	-20.7475	3.54249	-3.54249	5.0999e-05	-20.4075	3.91061	-3.91061	1.69148e-06
CUT296	mapped5	-35.3682	-29.2957	29.2957	0.00514046	-20.2576	-0.723018	0.723018	0.199078	-20.7397	0.487933	-0.487933	0.348713	-34.9846	30.0629	-30.0629	0.000466225	-35.5092	29.0138	-29.0138	0.0164038
CUT297	bothEndsMapped	-35.7595	-28.5131	28.5131	0.0675844	-21.5703	0.365357	-0.365357	0.63786	-21.4214	0.314077	-0.314077	0.690874	-35.912	28.2081	-28.2081	0.0451569	-35.8087	28.4147	-28.4147	0.0655284
CUT298	bothEndsMapped	-20.4729	-4.20572	4.20572	7.04388e-06	-18.6181	0.720979	-0.720979	0.0810182	-18.4014	0.534082	-0.534082	0.196713	-20.7788	3.47985	-3.47985	7.23629e-05	-20.5263	3.67309	-3.67309	1.43234e-05
CUT299	bothEndsMapped	-20.9461	-3.25943	3.25943	0.00119523	-19.4589	0.459016	-0.459016	0.303904	-19.3575	0.503135	-0.503135	0.259467	-21.1328	2.77183	-2.77183	0.00514874	-20.9971	2.7314	-2.7314	0.00422703
CUT300	bothEndsMapped	-34.756	-30.5201	30.5201	2.31833e-05	-19.2503	-0.29494	0.29494	0.548722	-19.539	0.529175	-0.529175	0.289681	-34.5893	30.8535	-30.8535	2.06204e-06	-34.9274	30.1772	-30.1772	3.08637e-05
CUT301	bothEndsMapped	-19.5809	-4.81984	4.81984	1.51762e-08	-17.2687	0.400392	-0.400392	0.299576	-16.8226	-0.24535	0.24535	0.518682	-19.733	4.40164	-4.40164	1.11384e-09	-19.2483	5.05912	-5.05912	1.52531e-13
CUT302	mapped3	-35.3777	-29.2767	29.2767	0.00688484	-21.5973	1.92647	-1.92647	0.008872	-21.0058	0.990176	-0.990176	0.0921817	-36.3242	27.3836	-27.3836	0.206438	-35.7693	28.4935	-28.4935	0.0655284
CUT303	bothEndsMapped	-35.0419	-29.9483	29.9483	0.000480257	-19.7226	-0.47549	0.47549	0.364086	-19.6028	-0.468651	0.468651	0.311563	-34.7817	30.4686	-30.4686	3.50316e-05	-34.7003	30.6316	-30.6316	1.15852e-05
CUT304	bothEndsMapped	-34.1492	-31.7337	31.7337	1.21583e-07	-18.5645	0.788963	-0.788963	0.0645518	-18.3878	0.681884	-0.681884	0.0974119	-34.522	30.988	-30.988	6.56007e-07	-34.3817	31.2686	-31.2686	3.39527e-08
CUT305	bothEndsMapped	-20.9791	-3.19338	3.19338	0.00169757	-19.3505	0.154313	-0.154313	0.806651	-19.2082	0.116163	-0.116163	0.840428	-21.0065	3.02451	-3.02451	0.00126794	-20.8243	3.07709	-3.07709	0.000412708
CUT306	mapped3	-15.1612	-6.41024	6.41024	1.70234e-17	-12.4247	1.15902	-1.15902	0.00160498	-12.0522	0.660527	-0.660527	0.0706345	-15.6887	5.24114	-5.24114	1.67417e-23	-15.2779	5.75083	-5.75083	4.37543e-28
CUT307	mapped3	-34.7399	-30.5523	30.5523	1.60165e-05	-19.2333	-0.294631	0.294631	0.586563	-19.0789	-0.356324	0.356324	0.462108	-34.5831	30.8659	-30.8659	1.58008e-06	-34.4668	31.0986	-31.0986	2.10095e-07
CUT308	mappedNone	-35.0718	-29.8885	29.8885	0.000616732	-20.2104	0.348696	-0.348696	0.53172	-19.3829	-1.05926	1.05926	0.0230287	-35.2357	29.5607	-29.5607	0.00061325	-34.4444	31.1433	-31.1433	1.04809e-07
CUT309	mapped5	-20.3292	-2.49317	2.49317	0.0054516	-18.9544	-0.0694289	0.0694289	0.877282	-18.8872	0.0428798	-0.0428798	0.947384	-20.2537	2.53013	-2.53013	0.00100303	-20.147	2.43172	-2.43172	0.000859508
CUT310	bothEndsMapped	-34.714	-30.6041	30.6041	1.99507e-05	-19.1135	-0.397693	0.397693	0.395757	-19.0136	-0.350768	0.350768	0.454594	-34.498	31.0361	-31.0361	6.37348e-07	-34.437	31.1581	-31.1581	1.04809e-07
CUT311	mapped5	-20.4836	-4.18435	4.18435	8.75083e-06	-18.2012	-0.151634	0.151634	0.713929	-18.3233	0.339086	-0.339086	0.400853	-20.353	4.33141	-4.33141	8.74212e-08	-20.4354	3.8548	-3.8548	2.99108e-06
CUT312	mapped3	-36.166	-27.7001	27.7001	0.0552824	-22.1237	-0.177287	0.177287	1	-21.8162	-0.545719	0.545719	0.53975	-36.0538	27.9244	-27.9244	0.120799	-35.7952	28.4418	-28.4418	0.0655284
CUT313	bothEndsMapped	-35.0683	-29.8954	29.8954	0.000616732	-20.0408	0.0432352	-0.0432352	1	-20.1032	0.414716	-0.414716	0.464359	-35.0734	29.8854	-29.8854	0.000782432	-35.1768	29.6784	-29.6784	0.000516931
CUT314	bothEndsMapped	-21.8685	-3.41466	3.41466	0.00830768	-20.712	1.30894	-1.30894	0.021422	-19.9257	-0.0170273	0.0170273	1	-22.4748	2.08796	-2.08796	0.203051	-21.6539	3.41774	-3.41774	0.00402664
CUT315	bothEndsMapped	-34.8988	-30.2345	30.2345	9.53644e-05	-19.3041	-0.753772	0.753772	0.0990171	-19.3899	-0.335547	0.335547	0.474334	-34.5036	31.0249	-31.0249	6.37348e-07	-34.6293	30.7734	-30.7734	2.81267e-06
CUT316	bothEndsMapped	-35.5405	-28.9511	28.9511	0.0202953	-20.7244	-0.454059	0.454059	0.471778	-20.4206	-0.815279	0.815279	0.115323	-35.2865	29.459	-29.459	0.000760861	-35.0217	29.9887	-29.9887	0.000111878
CUT317	bothEndsMapped	-20.5336	-2.91443	2.91443	0.00168347	-18.8619	-0.208507	0.208507	0.658536	-18.7495	-0.186699	0.186699	0.669703	-20.3764	3.1148	-3.1148	4.68322e-05	-20.2273	3.10112	-3.10112	6.79308e-05
CUT318	mapped3	-35.5699	-28.8924	28.8924	0.0202953	-20.9788	-0.0861206	0.0861206	1	-20.3838	-1.02938	1.02938	0.047827	-35.507	29.0181	-29.0181	0.00544446	-34.9524	30.1272	-30.1272	4.88247e-05
CUT319	bothEndsMapped	-19.7978	-3.55603	3.55603	1.86881e-05	-17.8604	-0.0993861	0.0993861	0.813524	-18.0054	0.437157	-0.437157	0.279501	-19.6961	3.64532	-3.64532	1.33401e-07	-19.8029	3.11978	-3.11978	7.65057e-06
CUT320	bothEndsMapped	-21.1158	-4.91994	4.91994	1.41596e-05	-18.5974	0.0929629	-0.0929629	0.851171	-18.3119	-0.231473	0.231473	0.578276	-21.1129	4.81168	-4.81168	1.57322e-06	-20.7897	5.14626	-5.14626	2.06796e-08
CUT321	bothEndsMapped	-23.6838	0.215894	-0.215894	0.679723	-22.0671	-3.23247	3.23247	5.77365e-05	-23.6245	0.128994	-0.128994	1	-22.019	2.99941	-2.99941	0.0154029	-23.5345	-0.343347	0.343347	0.675348
CUT322	bothEndsMapped	-19.8714	-3.40883	3.40883	4.63692e-05	-18.0136	-0.0918106	0.0918106	0.82825	-17.8703	-0.131898	0.131898	0.727261	-19.7754	3.4866	-3.4866	4.81275e-07	-19.5942	3.53723	-3.53723	1.4874e-07
CUT323	bothEndsMapped	-35.6305	-28.7711	28.7711	0.0248723	-21.5657	0.873764	-0.873764	0.291252	-21.3511	0.690895	-0.690895	0.313178	-36.0416	27.9488	-27.9488	0.0726459	-35.8641	28.3038	-28.3038	0.0985698
CUT324	mapped5	-35.4279	-29.1763	29.1763	0.00688484	-20.5401	-0.447835	0.447835	0.574213	-20.132	-1.01654	1.01654	0.05242	-35.1938	29.6446	-29.6446	0.00415315	-34.8371	30.358	-30.358	4.33336e-05
CUT325	mapped5	-35.1421	-29.7478	29.7478	0.00107286	-20.8123	1.31379	-1.31379	0.0266037	-20.1209	0.1775	-0.1775	0.785153	-35.7753	28.4816	-28.4816	0.0303834	-35.126	29.7802	-29.7802	0.00043075
CUT326	mapped5	-36.601	-26.83	26.83	0.205111	-24.132	2.0966	-2.0966	0.240022	-23.3168	0.712968	-0.712968	0.77136	-37.6294	24.7732	-24.7732	1	-36.8556	26.321	-26.321	0.564576
CUT327	bothEndsMapped	-20.0031	-2.50159	2.50159	0.00320217	-18.9933	0.68209	-0.68209	0.118928	-18.7491	0.440428	-0.440428	0.289974	-20.2964	1.80075	-1.80075	0.0181492	-20.0156	2.0505	-2.0505	0.00416608
CUT328	mapped3	-20.7006	-1.75038	1.75038	0.0518599	-19.8838	0.333743	-0.333743	0.508762	-19.6093	0.0312024	-0.0312024	1	-20.8163	1.40489	-1.40489	0.105795	-20.5028	1.72012	-1.72012	0.0268555
CUT329	mapped5	-34.9717	-30.0888	30.0888	0.000190969	-20.2736	0.921421	-0.921421	0.081842	-20.036	0.692623	-0.692623	0.158054	-35.4053	29.2215	-29.2215	0.00233634	-35.2068	29.6185	-29.6185	0.00104969
CUT330	bothEndsMapped	-20.691	-3.76953	3.76953	8.97881e-05	-19.0087	0.621204	-0.621204	0.167028	-19.1214	1.0932	-1.0932	0.0103511	-20.9508	3.13581	-3.13581	0.000846727	-21.023	2.67971	-2.67971	0.00619683
CUT331	bothEndsMapped	-37.3953	-25.2415	25.2415	1	-37.3436	25.3449	-25.3449	0.507681	-25.117	1.13849	-1.13849	1	-50.0161	0	0	1	-37.8601	24.3118	-24.3118	1
CUT332	bothEndsMapped	-21.4863	-4.17907	4.17907	0.000284541	-19.4469	0.3002	-0.3002	0.502235	-19.3392	0.331641	-0.331641	0.489141	-21.5893	3.8588	-3.8588	0.000279856	-21.4449	3.83577	-3.83577	0.000399541
CUT333	bothEndsMapped	-36.8943	-26.2434	26.2434	0.572849	-36.843	26.3462	-26.3462	0.136607	-36.7813	26.4696	-26.4696	0.136699	-50.0161	0	0	1	-50.0161	0	0	1
CUT334	mapped5	-34.9952	-30.0417	30.0417	0.000190969	-20.1415	0.494	-0.494	0.332485	-19.7785	0.015203	-0.015203	0.955494	-35.2324	29.5674	-29.5674	0.00372308	-34.9098	30.2125	-30.2125	0.00015963
CUT335	bothEndsMapped	-34.7925	-30.4472	30.4472	4.1989e-05	-19.6736	0.390056	-0.390056	0.378832	-19.2765	-0.157232	0.157232	0.771128	-34.9703	30.0915	-30.0915	0.000466225	-34.62	30.7921	-30.7921	2.17671e-06
CUT336	bothEndsMapped	-22.1108	-0.930038	0.930038	0.671345	-21.7675	0.470189	-0.470189	0.621428	-21.4997	0.180984	-0.180984	0.890503	-22.293	0.451495	-0.451495	1	-21.9865	0.75253	-0.75253	0.637798
CUT337	mapped3	-34.3326	-31.3669	31.3669	1.13144e-06	-18.7192	0.34801	-0.34801	0.421892	-18.4471	0.0503715	-0.0503715	0.919711	-34.4864	31.0593	-31.0593	4.8406e-07	-34.2551	31.522	-31.522	1.96072e-08
CUT338	mapped3	-50.0161	0	0	1	-36.5872	-26.8577	26.8577	0.0723155	-36.3278	-27.3765	27.3765	0.0115921	-36.6215	26.789	-26.789	0.323241	-36.3432	27.3456	-27.3456	0.120129
CUT339	mapped3	-37.0973	-25.8374	25.8374	0.572849	-37.0473	25.9375	-25.9375	0.261521	-36.9856	26.0609	-26.0609	0.261612	-50.0161	0	0	1	-50.0161	0	0	1
CUT340	bothEndsMapped	-20.8978	-5.35608	5.35608	8.23687e-07	-18.2711	0.300837	-0.300837	0.461055	-18.321	0.647282	-0.647282	0.118494	-21.0004	5.03675	-5.03675	3.09043e-07	-21.0159	4.69377	-4.69377	1.23196e-06
CUT341	mapped5	-35.2264	-29.5794	29.5794	0.00197825	-19.9894	-0.694378	0.694378	0.187144	-20.2576	0.0888034	-0.0888034	0.883342	-34.8595	30.3131	-30.3131	0.000103426	-35.1675	29.6971	-29.6971	0.000516931
CUT342	bothEndsMapped	-34.0705	-31.891	31.891	4.3383e-08	-18.378	0.728956	-0.728956	0.0769935	-18.0211	0.26152	-0.26152	0.51306	-34.4099	31.2123	-31.2123	1.31027e-07	-34.0922	31.8477	-31.8477	8.05479e-10
CUT343	mapped5	-35.1786	-29.675	29.675	0.00118389	-19.6833	-1.08556	1.08556	0.0171409	-19.7709	-0.664083	0.664083	0.151945	-34.611	30.8101	-30.8101	2.71706e-06	-34.742	30.5481	-30.5481	1.27126e-05
CUT344	mapped3	-21.0847	0.632501	-0.632501	0.44847	-20.6497	-1.28702	1.28702	0.021422	-21.0417	-0.256309	0.256309	0.744869	-20.3907	0.64142	-0.64142	0.425478	-20.7454	-0.379849	0.379849	0.641793
CUT345	mapped3	-20.2434	-1.49488	1.49488	0.0753161	-19.127	-0.541627	0.541627	0.233138	-19.1591	-0.230769	0.230769	0.614756	-19.9277	2.01206	-2.01206	0.00257127	-19.9225	1.71065	-1.71065	0.0113938
CUT346	mapped3	-35.3577	-29.3167	29.3167	0.00514046	-21.0219	0.874617	-0.874617	0.200166	-20.8659	0.809045	-0.809045	0.164995	-35.7714	28.4893	-28.4893	0.0303834	-35.6549	28.7224	-28.7224	0.0319564
CUT347	mapped5	-36.7649	-26.5023	26.5023	0.335543	-36.7044	26.6233	-26.6233	0.136607	-24.4694	2.39946	-2.39946	0.240188	-50.0161	0	0	1	-37.8543	24.3236	-24.3236	1
CUT348	mapped5	-36.8847	-26.2627	26.2627	0.335543	-24.4116	1.51048	-1.51048	0.393772	-23.4376	-0.190521	0.190521	1	-37.6247	24.7828	-24.7828	1	-36.6914	26.6494	-26.6494	0.322673
CUT349	mapped5	-37.1268	-25.7785	25.7785	1	-24.6501	1.06041	-1.06041	1	-23.8429	-0.307742	0.307742	1	-37.6294	24.7732	-24.7732	1	-36.8611	26.3099	-26.3099	0.564576
CUT350	bothEndsMapped	-33.5609	-32.9102	32.9102	2.67921e-11	-17.205	0.408702	-0.408702	0.290704	-16.7882	-0.178295	0.178295	0.638701	-33.7449	32.5423	-32.5423	1.09154e-12	-33.367	33.2981	-33.2981	6.71265e-17
CUT351	bothEndsMapped	-34.3047	-31.4228	31.4228	6.77813e-07	-18.6826	0.370305	-0.370305	0.375968	-18.6923	0.636468	-0.636468	0.123571	-34.4712	31.0897	-31.0897	3.70687e-07	-34.5239	30.9843	-30.9843	5.64192e-07
CUT352	mapped5	-20.6073	-2.76712	2.76712	0.00275539	-19.1794	0.0938031	-0.0938031	0.825855	-18.9938	-0.0305343	0.0305343	0.971913	-20.6117	2.64424	-2.64424	0.00113625	-20.3919	2.77182	-2.77182	0.000325854
CUT353	bothEndsMapped	-19.9953	-2.51707	2.51707	0.002878	-18.6679	0.0742028	-0.0742028	0.896392	-18.3131	-0.388816	0.388816	0.342545	-19.9826	2.42844	-2.42844	0.000553271	-19.5877	2.90645	-2.90645	1.40708e-05
CUT354	mapped3	-34.4248	-31.1826	31.1826	5.92488e-07	-18.9134	0.377631	-0.377631	0.408091	-18.7899	0.37719	-0.37719	0.381348	-34.5928	30.8466	-30.8466	2.06204e-06	-34.5068	31.0185	-31.0185	3.46082e-07
CUT355	mapped5	-19.4433	-2.26506	2.26506	0.0027364	-18.3448	0.273628	-0.273628	0.506082	-18.2699	0.370407	-0.370407	0.356493	-19.5312	1.97501	-1.97501	0.00142319	-19.4183	1.88906	-1.88906	0.00288602
CUT356	bothEndsMapped	-34.9144	-30.2032	30.2032	0.000117732	-19.2651	-0.883132	0.883132	0.0535696	-19.5937	0.0207281	-0.0207281	0.959557	-34.4479	31.1364	-31.1364	2.22826e-07	-34.8177	30.3968	-30.3968	4.33336e-05
CUT357	mapped3	-34.4808	-31.0706	31.0706	1.1386e-06	-19.0442	0.397387	-0.397387	0.370316	-18.7896	0.135017	-0.135017	0.779864	-34.6615	30.7091	-30.7091	5.25855e-06	-34.4487	31.1346	-31.1346	1.04809e-07
CUT358	bothEndsMapped	-36.2153	-27.6016	27.6016	0.0851333	-21.1737	-2.29537	2.29537	0.000520251	-21.5219	-1.35185	1.35185	0.0506381	-35.0513	29.9295	-29.9295	0.000782432	-35.4433	29.1454	-29.1454	0.00740752
CUT359	mappedNone	-22.0566	-3.03851	3.03851	0.033078	-20.8067	0.750007	-0.750007	0.20858	-20.669	0.721045	-0.721045	0.250607	-22.3815	2.27445	-2.27445	0.210622	-22.2126	2.30037	-2.30037	0.109226
CUT360	bothEndsMapped	-20.4834	-2.18481	2.18481	0.0170613	-19.7055	0.80933	-0.80933	0.0908464	-19.642	0.929276	-0.929276	0.050173	-20.8445	1.34843	-1.34843	0.133244	-20.7505	1.22458	-1.22458	0.169233
CUT361	mapped5	-34.6202	-30.7917	30.7917	5.87216e-06	-19.8268	1.43272	-1.43272	0.00391317	-19.4718	0.969197	-0.969197	0.0295718	-35.3104	29.4112	-29.4112	0.00113854	-34.9936	30.0449	-30.0449	9.31349e-05
CUT362	mapped5	-34.7532	-30.5258	30.5258	2.31833e-05	-19.9615	1.16208	-1.16208	0.026818	-19.9084	1.30228	-1.30228	0.00682974	-35.3159	29.4003	-29.4003	0.000760861	-35.2967	29.4387	-29.4387	0.0018774
CUT363	bothEndsMapped	-21.7998	-3.55207	3.55207	0.0035271	-19.6397	-0.59056	0.59056	0.25009	-19.6827	-0.257528	0.257528	0.634494	-21.4618	4.11392	-4.11392	8.79822e-05	-21.4702	3.78521	-3.78521	0.00035583
CUT364	bothEndsMapped	-36.592	-26.848	26.848	0.205111	-23.332	0.522189	-0.522189	1	-23.1371	0.379411	-0.379411	0.793223	-36.8362	26.3598	-26.3598	0.564941	-36.6859	26.6604	-26.6604	0.322673
CUT365	mapped5	-35.4953	-29.0416	29.0416	0.0147785	-21.1533	0.611691	-0.611691	0.449771	-20.8336	0.218218	-0.218218	0.839962	-35.7714	28.4893	-28.4893	0.0303834	-35.4873	29.0574	-29.0574	0.0109414
CUT366	mapped5	-20.8913	-1.36903	1.36903	0.189996	-20.1179	0.0239205	-0.0239205	1	-20.0409	0.116681	-0.116681	0.897054	-20.8564	1.32473	-1.32473	0.133244	-20.7474	1.2309	-1.2309	0.169233
CUT367	bothEndsMapped	-35.6785	-28.6752	28.6752	0.0342382	-21.4188	0.343156	-0.343156	0.573079	-21.1917	0.135867	-0.135867	0.908198	-35.8352	28.3617	-28.3617	0.0504403	-35.6506	28.7308	-28.7308	0.0319564
CUT368	mapped5	-19.5165	-2.50389	2.50389	0.00105018	-17.8517	-0.624018	0.624018	0.11763	-18.0512	0.0216434	-0.0216434	0.953031	-19.1573	3.10819	-3.10819	7.58246e-07	-19.3179	2.47506	-2.47506	5.07171e-05
CUT369	mapped5	-20.5759	-3.99981	3.99981	2.15184e-05	-19.229	1.53587	-1.53587	0.00106882	-19.0364	1.39701	-1.39701	0.00121831	-21.2939	2.44972	-2.44972	0.0246146	-21.0564	2.61292	-2.61292	0.00731709
CUT370	bothEndsMapped	-36.3197	-27.3927	27.3927	0.135458	-22.1184	-0.792957	0.792957	0.329333	-22.7236	0.663885	-0.663885	0.644688	-35.9003	28.2316	-28.2316	0.0451569	-36.5513	26.9295	-26.9295	0.191544
CUT371	bothEndsMapped	-36.3928	-27.2465	27.2465	0.221984	-22.5286	-0.278001	0.278001	1	-24.1152	3.1421	-3.1421	0.0527785	-36.232	27.5681	-27.5681	0.206438	-37.8601	24.3118	-24.3118	1
CUT372	bothEndsMapped	-35.4569	-29.1182	29.1182	0.00814382	-20.7814	-0.0342716	0.0342716	1	-20.481	-0.388317	0.388317	0.468572	-35.4241	29.184	-29.184	0.00233634	-35.1698	29.6924	-29.6924	0.000371008
CUT373	mapped3	-21.9956	-3.1604	3.1604	0.0205151	-20.4601	0.309518	-0.309518	0.651943	-20.2304	0.0965952	-0.0965952	0.885528	-22.0964	2.84473	-2.84473	0.0286031	-21.8339	3.05774	-3.05774	0.00844982
CUT374	bothEndsMapped	-35.0533	-29.9255	29.9255	0.000480257	-19.4904	-1.03096	1.03096	0.0305241	-19.9982	0.231758	-0.231758	0.663626	-34.527	30.9782	-30.9782	8.52418e-07	-35.0803	29.8715	-29.8715	0.000153482
CUT375	mapped3	-19.1281	-3.72547	3.72547	1.69605e-06	-17.6347	0.986496	-0.986496	0.0122534	-17.1841	0.331612	-0.331612	0.391017	-19.561	2.74557	-2.74557	2.85796e-05	-19.0724	3.41098	-3.41098	2.37002e-08
CUT376	mapped5	-20.8636	-3.42448	3.42448	0.000470712	-19.1294	0.155339	-0.155339	0.731943	-19.2089	0.561094	-0.561094	0.218459	-20.8957	3.24605	-3.24605	0.000447389	-20.9392	2.84732	-2.84732	0.00167015
CUT377	mapped5	-20.1335	-1.7146	1.7146	0.04221	-19.4051	0.462367	-0.462367	0.316525	-19.1461	0.190975	-0.190975	0.670297	-20.3181	1.23128	-1.23128	0.122371	-20.0198	1.51601	-1.51601	0.0265125
CUT378	bothEndsMapped	-20.5707	-2.84038	2.84038	0.00229087	-19.2143	0.350116	-0.350116	0.443131	-18.5951	-0.641799	0.641799	0.117498	-20.6938	2.47986	-2.47986	0.00272054	-20.0354	3.48494	-3.48494	2.56375e-06
CUT379	bothEndsMapped	-20.4057	-3.17035	3.17035	0.000495616	-18.7145	0.0192273	-0.0192273	1	-18.4265	-0.310302	0.310302	0.440866	-20.3589	3.14981	-3.14981	4.26375e-05	-20.034	3.48767	-3.48767	2.89681e-06
CUT380	mapped5	-35.4351	-29.162	29.162	0.00814382	-21.4514	1.45503	-1.45503	0.0418343	-21.4	1.59821	-1.59821	0.0199066	-36.129	27.7741	-27.7741	0.120799	-36.1202	27.7917	-27.7917	0.0720844
CUT381	mapped5	-21.3873	-0.377078	0.377078	0.750975	-21.2933	0.371706	-0.371706	0.588082	-20.8958	-0.176132	0.176132	0.839962	-21.5304	-0.0233504	0.0233504	0.821124	-21.1013	0.523118	-0.523118	0.626948
CUT382	bothEndsMapped	-20.3942	-3.19326	3.19326	0.000387947	-19.114	0.853426	-0.853426	0.0626005	-18.7082	0.288444	-0.288444	0.494534	-20.7727	2.32215	-2.32215	0.00671923	-20.3254	2.90485	-2.90485	0.000137702
CUT383	bothEndsMapped	-19.9753	-1.58634	1.58634	0.051195	-18.8302	-0.499478	0.499478	0.253784	-18.661	-0.591247	0.591247	0.154212	-19.679	2.06472	-2.06472	0.0017329	-19.4702	2.17061	-2.17061	0.000528391
CUT384	bothEndsMapped	-36.3673	-27.2974	27.2974	0.0851333	-22.0649	-1.1319	1.1319	0.282762	-22.5127	0.0109405	-0.0109405	1	-35.7867	28.4588	-28.4588	0.0303834	-36.2759	27.4804	-27.4804	0.120129
CUT385	mapped3	-21.0225	-3.10666	3.10666	0.00209256	-19.3308	-0.0830781	0.0830781	0.922511	-19.4555	0.413145	-0.413145	0.381313	-20.9346	3.16824	-3.16824	0.000653737	-21.0245	2.67656	-2.67656	0.00489117
CUT386	mapped5	-35.6304	-28.7713	28.7713	0.0248723	-21.1341	-0.0175408	0.0175408	1	-20.761	-0.517036	0.517036	0.39338	-35.5986	28.835	-28.835	0.00784961	-35.2661	29.4998	-29.4998	0.00132198
CUT387	mapped5	-35.5699	-28.8924	28.8924	0.0202953	-20.5863	-0.871212	0.871212	0.13049	-21.2916	0.786162	-0.786162	0.222163	-35.1136	29.8049	-29.8049	0.00162226	-35.8596	28.3129	-28.3129	0.0985698
CUT388	mapped3	-37.4055	-25.2211	25.2211	1	-24.1392	-1.09235	1.09235	1	-24.6108	0.0972871	-0.0972871	1	-36.8362	26.3598	-26.3598	0.564941	-37.3509	25.3304	-25.3304	1
CUT389	mapped5	-19.8751	-2.75748	2.75748	0.000948859	-18.6386	0.493313	-0.493313	0.254081	-18.255	-0.0274038	0.0274038	0.964347	-20.0742	2.24513	-2.24513	0.0018209	-19.651	2.77972	-2.77972	4.16243e-05
CUT390	bothEndsMapped	-35.5246	-28.983	28.983	0.0147785	-20.3198	-1.21389	1.21389	0.0224052	-20.714	-0.178808	0.178808	0.782085	-34.8966	30.2388	-30.2388	0.000144994	-35.3351	29.362	-29.362	0.00270927
CUT391	mapped5	-35.5657	-28.9007	28.9007	0.0282106	-21.1943	0.383212	-0.383212	0.601999	-21.1591	0.559293	-0.559293	0.418038	-35.7309	28.5703	-28.5703	0.0187993	-35.7364	28.5592	-28.5592	0.0442305
CUT392	mapped3	-50.0161	0	0	1	-50.0161	0	0	1	-50.0161	0	0	1	-50.0161	0	0	1	-50.0161	0	0	1
CUT393	bothEndsMapped	-36.61	-26.8122	26.8122	0.205111	-23.146	0.0989819	-0.0989819	1	-22.1922	-1.56195	1.56195	0.0377723	-36.635	26.7622	-26.7622	0.564941	-35.7336	28.5648	-28.5648	0.0483076
CUT394	mapped3	-36.0228	-27.9865	27.9865	0.0401085	-22.3776	0.879845	-0.879845	0.421635	-22.5627	1.497	-1.497	0.169557	-36.4537	27.1248	-27.1248	0.192139	-36.6803	26.6714	-26.6714	0.191544
CUT395	mapped5	-20.0131	-3.12538	3.12538	0.000221711	-18.5864	0.490915	-0.490915	0.243224	-18.2323	0.0292895	-0.0292895	0.964745	-20.2084	2.62076	-2.62076	0.000596784	-19.8147	3.09626	-3.09626	1.02915e-05
CUT396	bothEndsMapped	-21.0252	-3.10122	3.10122	0.00209256	-19.1224	-0.541157	0.541157	0.253023	-19.1657	-0.207508	0.207508	0.697346	-20.7164	3.60472	-3.60472	3.71231e-05	-20.7227	3.28027	-3.28027	0.000110725
CUT397	mapped3	-36.7649	-26.5023	26.5023	0.335543	-24.2798	1.77405	-1.77405	0.393772	-23.4793	0.419323	-0.419323	1	-37.6247	24.7828	-24.7828	1	-36.8611	26.3099	-26.3099	0.564576
CUT398	bothEndsMapped	-35.0159	-30.0004	30.0004	0.000298187	-20.168	0.509833	-0.509833	0.322901	-19.8246	0.0697175	-0.0697175	0.954175	-35.2512	29.5297	-29.5297	0.000519935	-34.95	30.1321	-30.1321	3.6038e-05
CUT399	mapped5	-34.1672	-31.6977	31.6977	1.21541e-07	-18.4818	0.543664	-0.543664	0.185842	-18.5341	0.894881	-0.894881	0.030341	-34.4165	31.199	-31.199	1.31027e-07	-34.5094	31.0133	-31.0133	3.46082e-07
CUT400	mapped5	-34.5939	-30.8444	30.8444	3.55235e-06	-18.8128	-0.526543	0.526543	0.229199	-19.0048	0.104343	-0.104343	0.831916	-34.3166	31.3989	-31.3989	2.46461e-08	-34.5477	30.9366	-30.9366	5.92952e-07
CUT401	bothEndsMapped	-35.1494	-29.7334	29.7334	0.00107286	-20.1926	0.0137756	-0.0137756	1	-20.1436	0.162694	-0.162694	0.785153	-35.1376	29.7569	-29.7569	0.00139891	-35.1324	29.7673	-29.7673	0.00043075
CUT402	mapped5	-18.0815	-2.3447	2.3447	0.000369903	-16.8632	0.126605	-0.126605	0.751614	-16.5837	-0.185845	0.185845	0.623306	-18.0939	2.20581	-2.20581	1.92733e-05	-17.7752	2.53147	-2.53147	3.32285e-07
CUT403	mapped5	-19.1795	-1.87374	1.87374	0.00871952	-18.4533	0.638847	-0.638847	0.121901	-17.9991	-0.0230052	0.0230052	0.969655	-19.4476	1.22335	-1.22335	0.0459053	-18.9535	1.89973	-1.89973	0.00103983
CUT404	mappedNone	-36.1583	-27.7155	27.7155	0.0552824	-22.2666	0.131093	-0.131093	1	-22.7177	1.28006	-1.28006	0.193861	-36.2108	27.6106	-27.6106	0.120799	-36.6968	26.6385	-26.6385	0.322673
CUT405	bothEndsMapped	-20.2295	-2.69265	2.69265	0.00191433	-18.8889	0.207933	-0.207933	0.655522	-18.6183	-0.0864298	0.0864298	0.866269	-20.2873	2.46281	-2.46281	0.00171367	-19.9797	2.76628	-2.76628	8.2178e-05
CUT406	mapped3	-22.1692	-0.813319	0.813319	0.664928	-21.1117	-1.0577	1.0577	0.0845111	-21.7434	0.451832	-0.451832	0.638278	-21.5835	1.87051	-1.87051	0.0605104	-22.1771	0.371337	-0.371337	1
CUT407	bothEndsMapped	-21.8779	-3.39583	3.39583	0.00738146	-19.8236	-0.509701	0.509701	0.305377	-19.8086	-0.293038	0.293038	0.532702	-21.5773	3.88296	-3.88296	0.000210727	-21.5289	3.66788	-3.66788	0.000766971
CUT408	bothEndsMapped	-21.5443	-4.06307	4.06307	0.000492038	-19.7705	0.691093	-0.691093	0.147405	-19.2402	-0.122422	0.122422	0.838794	-21.8506	3.33621	-3.33621	0.00450758	-21.2824	4.16078	-4.16078	2.74211e-05
CUT409	bothEndsMapped	-20.3238	-1.33408	1.33408	0.148684	-19.4523	-0.220204	0.220204	0.678016	-19.4539	0.0298762	-0.0298762	0.962929	-20.17	1.5276	-1.5276	0.0342877	-20.133	1.28968	-1.28968	0.0896849
CUT410	mapped3	-18.1401	-1.95247	1.95247	0.00256439	-17.8297	1.55959	-1.55959	0.000104812	-17.4095	0.965585	-0.965585	0.0132225	-18.8655	0.387679	-0.387679	0.532124	-18.4076	0.991613	-0.991613	0.054685
CUT411	bothEndsMapped	-20.8143	-3.523	3.523	0.000301038	-19.2526	0.621104	-0.621104	0.188713	-18.8305	0.023411	-0.023411	0.974428	-21.0748	2.88779	-2.88779	0.00252361	-20.6122	3.50126	-3.50126	6.34656e-05
CUT412	bothEndsMapped	-35.5754	-28.8814	28.8814	0.0282106	-21.1936	0.326285	-0.326285	0.701103	-21.2428	0.671392	-0.671392	0.280786	-35.7197	28.5928	-28.5928	0.0187993	-35.8087	28.4147	-28.4147	0.0655284
CUT413	mapped3	-36.166	-27.7001	27.7001	0.0552824	-22.4042	0.383563	-0.383563	0.824462	-23.3742	2.57039	-2.57039	0.0368042	-36.3372	27.3576	-27.3576	0.192139	-37.3509	25.3304	-25.3304	1
CUT414	mapped3	-36.7376	-26.557	26.557	0.335543	-22.9631	-0.781491	0.781491	0.580596	-24.4584	2.45576	-2.45576	0.240188	-36.3286	27.3749	-27.3749	0.192139	-37.8601	24.3118	-24.3118	1
CUT415	mapped3	-35.9874	-28.0573	28.0573	0.0401085	-22.1064	0.497745	-0.497745	0.706605	-22.3163	1.16422	-1.16422	0.12662	-36.2193	27.5935	-27.5935	0.206438	-36.4635	27.1051	-27.1051	0.191544
CUT416	bothEndsMapped	-35.8302	-28.3718	28.3718	0.012201	-23.3659	3.62884	-3.62884	0.00165561	-22.1414	1.42686	-1.42686	0.0862383	-37.6294	24.7732	-24.7732	1	-36.4478	27.1365	-27.1365	0.191544
CUT417	bothEndsMapped	-20.8755	-3.40071	3.40071	0.000632181	-19.0145	-0.104759	0.104759	0.839965	-19.1896	0.491921	-0.491921	0.269311	-20.7726	3.49229	-3.49229	8.21575e-05	-20.9096	2.90645	-2.90645	0.00143908
CUT418	mapped5	-22.0028	0.0239889	-0.0239889	1	-21.6084	-0.636808	0.636808	0.539234	-21.4266	-0.753143	0.753143	0.313178	-21.6414	0.584684	-0.584684	0.639101	-21.4283	0.699047	-0.699047	0.575417
CUT419	mapped3	-34.7144	-30.6033	30.6033	1.99507e-05	-19.5753	0.553718	-0.553718	0.270887	-19.2255	0.100526	-0.100526	0.870056	-34.9662	30.0998	-30.0998	0.000327438	-34.6535	30.7252	-30.7252	3.99463e-06
CUT420	bothEndsMapped	-35.0924	-29.8473	29.8473	0.000511929	-20.0825	0.0144546	-0.0144546	1	-20.0287	0.153767	-0.153767	0.7483	-35.0847	29.8627	-29.8627	0.00111861	-35.0674	29.8973	-29.8973	0.000213483
CUT421	bothEndsMapped	-20.8293	-1.49296	1.49296	0.11932	-20.34	0.755313	-0.755313	0.158221	-19.784	-0.110519	0.110519	0.819482	-21.15	0.737459	-0.737459	0.471272	-20.5537	1.61824	-1.61824	0.0465484
CUT422	bothEndsMapped	-21.1694	-2.81286	2.81286	0.00777596	-19.7362	0.141072	-0.141072	0.8079	-19.3467	-0.391276	0.391276	0.386731	-21.1956	2.64632	-2.64632	0.0116934	-20.7682	3.18926	-3.18926	0.00026338
CUT423	mapped5	-20.7692	-1.61317	1.61317	0.0782154	-19.5246	-0.671068	0.671068	0.162575	-19.5321	-0.409361	0.409361	0.381142	-20.385	2.26745	-2.26745	0.00422864	-20.3553	2.01499	-2.01499	0.0125022
CUT424	bothEndsMapped	-20.0888	-2.33009	2.33009	0.00380579	-18.9575	0.268598	-0.268598	0.536206	-18.973	0.546284	-0.546284	0.197573	-20.1773	2.03907	-2.03907	0.00638977	-20.1501	1.78152	-1.78152	0.0131395
CUT425	mapped3	-35.8974	-28.2374	28.2374	0.0262834	-22.6337	1.91875	-1.91875	0.0557538	-21.478	-0.145851	0.145851	0.894625	-36.8362	26.3598	-26.3598	0.564941	-35.7234	28.5853	-28.5853	0.0483076
CUT426	bothEndsMapped	-21.499	-0.983656	0.983656	0.439161	-20.7467	-0.344166	0.344166	0.677189	-20.8592	0.128105	-0.128105	0.844168	-21.282	1.3036	-1.3036	0.276412	-21.3605	0.834754	-0.834754	0.475211
CUT427	mapped3	-37.9011	-24.2298	24.2298	1	-25.4298	-0.498955	0.498955	1	-25.6211	0.13037	-0.13037	1	-37.6294	24.7732	-24.7732	1	-37.8601	24.3118	-24.3118	1
CUT428	bothEndsMapped	-34.855	-30.3221	30.3221	7.62644e-05	-19.4413	-0.319025	0.319025	0.538474	-19.6798	0.404882	-0.404882	0.368011	-34.6816	30.669	-30.669	6.97276e-06	-34.9581	30.1159	-30.1159	4.88247e-05
CUT429	bothEndsMapped	-22.0539	0.126101	-0.126101	0.812342	-22.3109	0.616716	-0.616716	0.389584	-22.5952	1.43182	-1.43182	0.225643	-22.3047	-0.741812	0.741812	0.514242	-22.5612	-1.56679	1.56679	0.345819
CUT430	bothEndsMapped	-22.4333	-2.28502	2.28502	0.182421	-20.967	-0.422392	0.422392	0.562954	-21.4994	0.888798	-0.888798	0.229587	-22.172	2.69344	-2.69344	0.0558355	-22.6676	1.39048	-1.39048	0.39616
CUT431	bothEndsMapped	-20.3874	-2.3769	2.3769	0.00779274	-19.1806	0.197226	-0.197226	0.723243	-18.9595	0.0014086	-0.0014086	1	-20.4334	2.17076	-2.17076	0.00610294	-20.173	2.37963	-2.37963	0.00122951
CUT432	mapped5	-19.1727	-2.16244	2.16244	0.00260468	-18.0353	0.101099	-0.101099	0.826383	-17.8509	-0.0210336	0.0210336	0.972434	-19.1733	2.04697	-2.04697	0.000474077	-18.9495	2.18276	-2.18276	0.000152359
CUT433	mapped3	-33.854	-32.3241	32.3241	1.62638e-09	-17.4939	-0.215011	0.215011	0.610404	-17.5751	0.194215	-0.194215	0.625532	-33.7327	32.5666	-32.5666	1.07047e-12	-33.8541	32.3239	-32.3239	2.68914e-12
CUT434	bothEndsMapped	-34.8777	-30.2767	30.2767	9.46431e-05	-19.1386	-1.02345	1.02345	0.0257761	-19.6302	0.206813	-0.206813	0.64349	-34.3524	31.3273	-31.3273	4.90871e-08	-34.8854	30.2613	-30.2613	8.90459e-05
CUT435	mapped5	-20.5521	-2.04733	2.04733	0.0188409	-19.1302	-0.589125	0.589125	0.183822	-19.279	-0.044981	0.044981	0.966508	-20.2082	2.62103	-2.62103	0.000540855	-20.3207	2.08414	-2.08414	0.00713113
CUT436	bothEndsMapped	-34.9647	-30.1026	30.1026	0.000230778	-19.7664	-0.0977072	0.0977072	0.950376	-19.5049	-0.373945	0.373945	0.447859	-34.8938	30.2445	-30.2445	0.000123086	-34.6795	30.673	-30.673	5.1476e-06
CUT437	bothEndsMapped	-21.3037	-1.37432	1.37432	0.186208	-19.8861	-1.2661	1.2661	0.0127019	-20.0797	-0.632043	0.632043	0.212084	-20.6219	2.62374	-2.62374	0.00144124	-20.7825	1.99061	-1.99061	0.0160498
CUT438	mapped5	-35.5864	-28.8593	28.8593	0.0282106	-21.1923	0.289641	-0.289641	0.701103	-21.0178	0.187237	-0.187237	0.825749	-35.7121	28.6079	-28.6079	0.0187993	-35.5718	28.8885	-28.8885	0.0214401
CUT439	bothEndsMapped	-21.0438	-5.06407	5.06407	6.68284e-06	-18.6002	0.376543	-0.376543	0.350355	-18.3478	0.118519	-0.118519	0.794969	-21.1827	4.67213	-4.67213	5.19336e-06	-20.8965	4.93271	-4.93271	1.42554e-07
CUT440	mapped5	-35.3568	-29.3186	29.3186	0.00514046	-20.9857	0.839136	-0.839136	0.200166	-20.78	0.673711	-0.673711	0.296039	-35.7384	28.5554	-28.5554	0.0303834	-35.5804	28.8714	-28.8714	0.014625
CUT441	bothEndsMapped	-19.4368	-1.35907	1.35907	0.0686306	-18.6241	-0.0819914	0.0819914	0.898875	-18.527	-0.029423	0.029423	0.978887	-19.3514	1.41575	-1.41575	0.0192227	-19.2191	1.36861	-1.36861	0.0218962
CUT442	bothEndsMapped	-20.0323	-2.44321	2.44321	0.00368628	-18.9563	0.488049	-0.488049	0.248924	-18.7352	0.292479	-0.292479	0.508749	-20.2304	1.93281	-1.93281	0.0110128	-19.9724	2.13699	-2.13699	0.00227067
CUT443	bothEndsMapped	-35.1367	-29.7587	29.7587	0.00107286	-21.0145	1.72354	-1.72354	0.00495425	-20.1859	0.312941	-0.312941	0.527984	-35.9754	28.0814	-28.0814	0.0726459	-35.1902	29.6518	-29.6518	0.000731108
CUT444	bothEndsMapped	-35.6598	-28.7126	28.7126	0.0342382	-21.4168	0.42798	-0.42798	0.471637	-21.1384	0.117824	-0.117824	0.908198	-35.8506	28.3309	-28.3309	0.0504403	-35.6189	28.7943	-28.7943	0.0214401
CUT445	mapped5	-19.172	-1.88867	1.88867	0.00909844	-18.0683	-0.086392	0.086392	0.839579	-18.027	0.0773077	-0.0773077	0.877293	-19.0735	1.97162	-1.97162	0.00085646	-18.995	1.81674	-1.81674	0.00120313
CUT446	bothEndsMapped	-21.4001	-4.35149	4.35149	0.000103458	-19.1565	0.0521957	-0.0521957	0.930271	-18.927	-0.159959	0.159959	0.734895	-21.3808	4.27587	-4.27587	2.55377e-05	-21.1139	4.49782	-4.49782	8.48208e-06
CUT447	mapped5	-35.0404	-29.9513	29.9513	0.000480257	-19.9239	-0.0578817	0.0578817	0.946031	-19.7255	-0.208191	0.208191	0.699973	-34.9901	30.052	-30.052	0.000466225	-34.8253	30.3816	-30.3816	5.77146e-05
CUT448	mappedNone	-37.9011	-24.2298	24.2298	1	-25.423	-0.512449	0.512449	1	-37.786	24.4601	-24.4601	1	-37.6247	24.7828	-24.7828	1	-50.0161	0	0	1
CUT449	bothEndsMapped	-21.0595	-5.03269	5.03269	6.35418e-06	-18.829	0.802714	-0.802714	0.0686935	-18.6231	0.637376	-0.637376	0.13158	-21.4089	4.21972	-4.21972	2.89721e-05	-21.1622	4.40115	-4.40115	1.71701e-05
CUT450	mapped3	-50.0161	0	0	1	-36.4411	-27.15	27.15	0.0723155	-36.6714	-26.6893	26.6893	0.0723949	-36.4713	27.0894	-27.0894	0.323241	-36.6859	26.6604	-26.6604	0.322673
CUT451	mapped3	-21.0948	0.207884	-0.207884	0.883224	-20.8944	-0.425977	0.425977	0.575102	-21.0693	0.170794	-0.170794	0.825749	-20.8366	0.194316	-0.194316	0.863464	-20.983	-0.410319	0.410319	0.609842
CUT452	mapped3	-22.6637	-1.82414	1.82414	0.244476	-22.248	1.18795	-1.18795	0.169148	-21.4791	-0.102983	0.102983	1	-23.2139	0.609695	-0.609695	1	-22.4055	1.91468	-1.91468	0.255277
CUT453	bothEndsMapped	-20.8318	-5.48796	5.48796	3.95489e-07	-17.9962	0.0234707	-0.0234707	0.982928	-17.826	-0.0704697	0.0704697	0.865708	-20.7962	5.44503	-5.44503	5.57109e-09	-20.5873	5.55109	-5.55109	2.91412e-10
CUT454	bothEndsMapped	-36.0593	-27.9136	27.9136	0.0627738	-21.9288	-0.126079	0.126079	1	-22.4696	1.20209	-1.20209	0.225643	-35.9714	28.0894	-28.0894	0.0726459	-36.5567	26.9187	-26.9187	0.191544
CUT455	mapped3	-35.0018	-30.0286	30.0286	0.000298187	-19.9375	0.123992	-0.123992	0.891352	-19.7321	-0.0403603	0.0403603	0.956125	-35.0402	29.9516	-29.9516	0.000555406	-34.8701	30.2919	-30.2919	8.90459e-05
CUT456	mapped5	-20.1873	-4.77699	4.77699	4.15925e-07	-17.6392	-0.133651	0.133651	0.772438	-17.4821	-0.201047	0.201047	0.617428	-20.0761	4.88532	-4.88532	1.03289e-09	-19.8821	4.96141	-4.96141	8.2809e-11
CUT457	mapped5	-37.3953	-25.2415	25.2415	1	-37.3436	25.3449	-25.3449	0.507681	-24.1026	-0.890392	0.890392	0.701377	-50.0161	0	0	1	-36.85	26.3321	-26.3321	0.564576
CUT458	bothEndsMapped	-20.8468	-5.45798	5.45798	5.2751e-07	-18.0519	0.0732559	-0.0732559	0.859177	-17.4758	-0.832177	0.832177	0.0322659	-20.8348	5.36788	-5.36788	1.3499e-08	-20.2208	6.28394	-6.28394	1.30042e-13
CUT459	mapped5	-35.2323	-29.5675	29.5675	0.00197825	-20.8014	0.939218	-0.939218	0.119651	-20.3541	0.290946	-0.290946	0.699769	-35.6752	28.6817	-28.6817	0.0119756	-35.272	29.4882	-29.4882	0.00132198
CUT460	bothEndsMapped	-37.9011	-24.2298	24.2298	1	-37.8477	24.3368	-24.3368	1	-25.6125	0.113222	-0.113222	1	-50.0161	0	0	1	-37.8543	24.3236	-24.3236	1
CUT461	bothEndsMapped	-37.9011	-24.2298	24.2298	1	-37.8477	24.3368	-24.3368	1	-37.786	24.4601	-24.4601	1	-50.0161	0	0	1	-50.0161	0	0	1
CUT462	bothEndsMapped	-20.4756	-3.03051	3.03051	0.000849358	-19.3188	0.933525	-0.933525	0.0347773	-18.8329	0.208111	-0.208111	0.630315	-20.8888	2.08989	-2.08989	0.0205733	-20.3647	2.82623	-2.82623	0.000269116
CUT463	bothEndsMapped	-22.5804	-1.99083	1.99083	0.180995	-21.3106	-0.313827	0.313827	0.678919	-21.6568	0.6249	-0.6249	0.377597	-22.3706	2.29631	-2.29631	0.14872	-22.6771	1.37134	-1.37134	0.39616
CUT464	bothEndsMapped	-35.9547	-28.1228	28.1228	0.0401085	-21.6767	-0.213477	0.213477	0.74818	-21.9954	0.67042	-0.67042	0.499483	-35.8274	28.3773	-28.3773	0.0303834	-36.1868	27.6585	-27.6585	0.0720844
CUT465	bothEndsMapped	-21.0357	-3.08028	3.08028	0.00290051	-19.4919	0.220465	-0.220465	0.710929	-19.3942	0.271385	-0.271385	0.591899	-21.0938	2.84996	-2.84996	0.00328514	-20.9583	2.80899	-2.80899	0.00263036
CUT466	mapped5	-34.2511	-31.5299	31.5299	3.54349e-07	-18.957	1.15821	-1.15821	0.00866947	-18.6288	0.748419	-0.748419	0.0748966	-34.8098	30.4126	-30.4126	4.84806e-05	-34.5192	30.9937	-30.9937	5.64192e-07
CUT467	bothEndsMapped	-21.2826	-4.58651	4.58651	2.68181e-05	-18.7015	-0.399358	0.399358	0.371975	-18.8178	0.0802874	-0.0802874	0.849277	-21.0429	4.95169	-4.95169	4.80229e-07	-21.122	4.48165	-4.48165	1.05209e-05
CUT468	bothEndsMapped	-19.3528	-2.83129	2.83129	0.000166673	-18.3693	1.09839	-1.09839	0.00846662	-17.9968	0.599952	-0.599952	0.137867	-19.8463	1.73009	-1.73009	0.0125345	-19.436	2.2389	-2.2389	0.000328097
CUT469	bothEndsMapped	-35.4825	-29.0671	29.0671	0.0108996	-20.6345	-0.407923	0.407923	0.554063	-20.5127	-0.405054	0.405054	0.448922	-35.2543	29.5235	-29.5235	0.000519935	-35.1738	29.6846	-29.6846	0.000516931
CUT470	mapped5	-34.9928	-30.0465	30.0465	0.000190969	-19.8367	-0.0874439	0.0874439	0.948727	-19.6533	-0.207342	0.207342	0.67883	-34.9357	30.1607	-30.1607	0.000233109	-34.7962	30.4398	-30.4398	2.51437e-05
CUT471	bothEndsMapped	-23.6838	0.215894	-0.215894	0.679723	-24.4318	1.49699	-1.49699	0.636263	-24.1264	1.13275	-1.13275	0.701377	-24.3808	-1.72409	1.72409	0.552398	-24.0358	-1.34589	1.34589	0.262239
CUT472	bothEndsMapped	-20.5876	-5.97644	5.97644	1.63488e-08	-17.8169	0.655962	-0.655962	0.0972862	-17.5321	0.332914	-0.332914	0.401719	-20.8629	5.31178	-5.31178	1.90328e-08	-20.5407	5.64417	-5.64417	8.65858e-11
CUT473	bothEndsMapped	-20.3615	-1.78472	1.78472	0.0341214	-19.2251	-0.300785	0.300785	0.553385	-19.0668	-0.370615	0.370615	0.399599	-20.166	2.06154	-2.06154	0.00519554	-19.9724	2.13699	-2.13699	0.00227067
CUT474	bothEndsMapped	-34.6919	-30.6484	30.6484	1.36305e-05	-19.4853	0.454001	-0.454001	0.342318	-19.2551	0.240207	-0.240207	0.619622	-34.894	30.2442	-30.2442	0.000123086	-34.7062	30.6197	-30.6197	1.15852e-05
CUT475	mapped3	-20.1206	-3.74055	3.74055	1.8644e-05	-18.004	-0.301481	0.301481	0.479221	-18.1208	0.178757	-0.178757	0.66745	-19.9252	4.01712	-4.01712	6.63449e-08	-20.0043	3.54712	-3.54712	1.75562e-06
CUT476	bothEndsMapped	-20.6189	-1.91385	1.91385	0.0317313	-19.2076	-0.710875	0.710875	0.119912	-18.959	-0.96126	0.96126	0.0263155	-20.2184	2.60066	-2.60066	0.000540855	-19.9298	2.86603	-2.86603	7.06132e-05
CUT477	mapped3	-23.0269	-1.09791	1.09791	0.755494	-22.6169	0.49831	-0.49831	0.810362	-22.6576	0.826157	-0.826157	0.504753	-23.2227	0.592109	-0.592109	1	-23.2301	0.265435	-0.265435	1
CUT478	mapped3	-36.4012	-27.2297	27.2297	0.221984	-22.3466	-0.666266	0.666266	0.668428	-22.5022	-0.108326	0.108326	0.836404	-36.0457	27.9406	-27.9406	0.0726459	-36.2503	27.5316	-27.5316	0.0720844
CUT479	bothEndsMapped	-19.6842	-1.44335	1.44335	0.0546904	-18.3965	-0.938984	0.938984	0.0242544	-18.6397	-0.205772	0.205772	0.629328	-19.1705	2.35672	-2.35672	8.47883e-05	-19.3751	1.63566	-1.63566	0.00691173
CUT480	mapped5	-19.6988	-1.75406	1.75406	0.0256306	-18.6591	-0.125206	0.125206	0.820436	-18.2885	-0.6198	0.6198	0.131855	-19.5879	1.86165	-1.86165	0.00298943	-19.1799	2.36592	-2.36592	6.9155e-05
CUT481	mapped5	-20.9604	-5.2308	5.2308	2.17785e-06	-18.3643	0.234725	-0.234725	0.571485	-18.3714	0.495722	-0.495722	0.233586	-21.0312	4.97501	-4.97501	3.88969e-07	-21.0018	4.72207	-4.72207	1.01841e-06
CUT482	bothEndsMapped	-35.2169	-29.5982	29.5982	0.00152273	-20.1106	-0.436474	0.436474	0.461109	-20.1249	-0.160659	0.160659	0.788816	-34.986	30.0602	-30.0602	0.000466225	-35.0459	29.9403	-29.9403	0.000111878
CUT483	bothEndsMapped	-19.2607	-1.71142	1.71142	0.0185951	-18.7261	0.850596	-0.850596	0.0491242	-18.5072	0.65936	-0.65936	0.107526	-19.6388	0.841111	-0.841111	0.21293	-19.3785	1.04968	-1.04968	0.0850438
CUT484	mapped3	-35.6136	-28.8049	28.8049	0.0248723	-21.0281	-0.149505	0.149505	0.905021	-20.9466	-0.0659652	0.0659652	1	-35.5139	29.0043	-29.0043	0.00544446	-35.4757	29.0807	-29.0807	0.0109414
CUT485	mappedNone	-36.4851	-27.0619	27.0619	0.221984	-23.0127	0.316264	-0.316264	1	-22.6107	-0.240738	0.240738	1	-36.626	26.78	-26.78	0.564941	-36.2657	27.5007	-27.5007	0.120129
CUT486	mapped5	-35.3163	-29.3996	29.3996	0.0029662	-20.4084	-0.238822	0.238822	0.727697	-20.5279	0.247204	-0.247204	0.674549	-35.1871	29.6579	-29.6579	0.00284521	-35.3461	29.3399	-29.3399	0.00397137
CUT487	bothEndsMapped	-34.8189	-30.3944	30.3944	4.13729e-05	-19.6608	0.254934	-0.254934	0.603698	-19.7435	0.66732	-0.66732	0.163684	-34.9364	30.1593	-30.1593	0.000168248	-35.0645	29.9031	-29.9031	0.000111878
CUT488	mapped5	-36.052	-27.9281	27.9281	0.0627738	-21.5861	-0.789994	0.789994	0.355711	-21.5134	-0.688775	0.688775	0.416271	-35.6338	28.7645	-28.7645	0.0119756	-35.6009	28.8302	-28.8302	0.0214401
CUT489	mapped5	-35.6833	-28.6656	28.6656	0.0477971	-21.7033	0.928872	-0.928872	0.269187	-21.0292	-0.172895	0.172895	0.825749	-36.1248	27.7824	-27.7824	0.120799	-35.4873	29.0574	-29.0574	0.0109414
CUT490	mapped5	-36.0366	-27.9588	27.9588	0.0627738	-21.8769	-0.107893	0.107893	1	-22.231	0.846107	-0.846107	0.450655	-35.9553	28.1216	-28.1216	0.0451569	-36.3485	27.3352	-27.3352	0.205719
CUT491	bothEndsMapped	-34.6843	-30.6636	30.6636	1.13459e-05	-19.4424	0.387886	-0.387886	0.411548	-19.0689	-0.112348	0.112348	0.796337	-34.8593	30.3136	-30.3136	7.47124e-05	-34.5275	30.9772	-30.9772	5.64192e-07
CUT492	bothEndsMapped	-20.6307	-2.72036	2.72036	0.0036377	-19.0212	-0.306419	0.306419	0.519652	-18.7971	-0.50777	0.50777	0.226888	-20.4311	3.00534	-3.00534	9.94965e-05	-20.1725	3.21062	-3.21062	2.98161e-05
CUT493	mapped3	-21.1796	-1.62249	1.62249	0.111851	-20.2713	0.0206589	-0.0206589	1	-20.2283	0.181276	-0.181276	0.830582	-21.1429	1.58173	-1.58173	0.141298	-21.0643	1.42716	-1.42716	0.124091
CUT494	bothEndsMapped	-34.5501	-30.932	30.932	2.7095e-06	-19.165	0.380609	-0.380609	0.407115	-18.7076	-0.287744	0.287744	0.494534	-34.7185	30.5951	-30.5951	1.7331e-05	-34.3003	31.4316	-31.4316	7.63198e-09
CUT495	mapped3	-22.7262	2.9446	-2.9446	0.0160539	-23.2296	-1.72568	1.72568	0.136299	-24.0172	0.096086	-0.096086	1	-21.8139	-1.23426	1.23426	0.174472	-22.5675	-3.05322	3.05322	0.0269222
CUT496	mapped3	-21.9213	-3.30899	3.30899	0.0114666	-21.0823	1.81871	-1.81871	0.00495425	-20.3194	0.539831	-0.539831	0.292631	-22.7889	1.45969	-1.45969	0.54135	-21.986	2.75359	-2.75359	0.0248407
CUT497	mapped5	-22.4951	-0.161327	0.161327	1	-22.5937	0.544654	-0.544654	0.644428	-21.9888	-0.418202	0.418202	0.62184	-22.7227	-0.407891	0.407891	0.705313	-22.0924	0.540813	-0.540813	0.637798
CUT498	mapped5	-21.0146	-3.12248	3.12248	0.00209256	-19.3608	0.0157464	-0.0157464	1	-19.4388	0.418565	-0.418565	0.359432	-20.9773	3.08282	-3.08282	0.00110395	-21.017	2.69162	-2.69162	0.00489117
CUT499	bothEndsMapped	-21.0723	-5.00702	5.00702	8.03681e-06	-18.6122	0.29751	-0.29751	0.490714	-18.297	-0.0862356	0.0862356	0.853997	-21.1729	4.69166	-4.69166	4.13947e-06	-20.8178	5.09005	-5.09005	3.43142e-08
CUT500	mapped3	-34.5865	-30.8591	30.8591	3.55235e-06	-19.8269	1.57821	-1.57821	0.0017184	-19.1084	0.387363	-0.387363	0.404982	-35.3516	29.329	-29.329	0.00174377	-34.6705	30.691	-30.691	5.1476e-06
CUT501	mapped5	-22.6561	-1.83942	1.83942	0.331013	-22.607	1.9722	-1.9722	0.0557538	-22.0972	1.199	-1.199	0.113982	-23.5875	-0.137548	0.137548	1	-23.0373	0.650938	-0.650938	1
CUT502	mapped3	-36.3928	-27.2465	27.2465	0.221984	-22.5114	-0.312282	0.312282	1	-22.4374	-0.213564	0.213564	1	-36.2193	27.5935	-27.5935	0.206438	-36.1868	27.6585	-27.6585	0.0720844
CUT503	bothEndsMapped	-18.2149	-1.93711	1.93711	0.00344838	-17.3995	0.520714	-0.520714	0.180021	-17.0441	0.0565091	-0.0565091	0.886936	-18.4245	1.40394	-1.40394	0.0063604	-18.0307	1.87952	-1.87952	0.000189286
CUT504	bothEndsMapped	-21.117	-4.91758	4.91758	1.41596e-05	-18.673	0.246203	-0.246203	0.577951	-18.6821	0.511055	-0.511055	0.222284	-21.1887	4.66011	-4.66011	5.19336e-06	-21.1603	4.40499	-4.40499	1.71701e-05
CUT505	bothEndsMapped	-36.5024	-27.0273	27.0273	0.205111	-23.0313	0.303767	-0.303767	1	-22.0997	-1.31274	1.31274	0.0862383	-36.6305	26.7711	-26.7711	0.564941	-35.7471	28.538	-28.538	0.0483076
CUT506	mapped3	-35.4876	-29.0569	29.0569	0.0108996	-20.3932	-0.906405	0.906405	0.0847264	-20.4738	-0.49875	0.49875	0.327726	-35.009	30.0142	-30.0142	0.000400083	-35.1349	29.7623	-29.7623	0.00043075
CUT507	bothEndsMapped	-20.991	-3.16972	3.16972	0.00169757	-18.6366	-1.36601	1.36601	0.00158695	-18.6884	-1.01537	1.01537	0.0174305	-20.267	4.50358	-4.50358	1.5041e-08	-20.2814	4.16291	-4.16291	1.7552e-07
CUT508	mapped5	-35.7924	-28.4474	28.4474	0.0675844	-21.5876	0.227049	-0.227049	0.759246	-21.0791	-0.54282	0.54282	0.446607	-35.8924	28.2474	-28.2474	0.0504403	-35.4279	29.1764	-29.1764	0.00509791
CUT509	mapped5	-22.0616	-1.02837	1.02837	0.541393	-21.3881	-0.101941	0.101941	1	-21.3435	0.0554543	-0.0554543	1	-21.9634	1.11059	-1.11059	0.45804	-21.8836	0.95842	-0.95842	0.391075
CUT510	bothEndsMapped	-19.7628	-2.01131	2.01131	0.00984752	-18.4138	-0.49205	0.49205	0.244392	-18.249	-0.57487	0.57487	0.158559	-19.4714	2.48002	-2.48002	7.39962e-05	-19.2683	2.5744	-2.5744	3.8423e-05
CUT511	mapped5	-24.1916	3.2315	-3.2315	0.12254	-23.8698	-3.64796	3.64796	0.00642097	-23.971	-3.19922	3.19922	0.0318453	-22.3092	0.419025	-0.419025	1	-22.3752	-0.0247437	0.0247437	0.773883
CUT512	mappedNone	-36.3034	-27.4253	27.4253	0.135458	-22.4233	-0.135918	0.135918	1	-21.4804	-1.77474	1.77474	0.00746554	-36.2193	27.5935	-27.5935	0.206438	-35.3263	29.3796	-29.3796	0.0018774
CUT513	bothEndsMapped	-34.9667	-30.0986	30.0986	0.000230778	-19.6087	-0.438547	0.438547	0.3999	-19.3141	-0.780697	0.780697	0.0880824	-34.735	30.5621	-30.5621	1.41722e-05	-34.4817	31.0688	-31.0688	2.68283e-07
CUT514	mapped5	-23.058	-1.03568	1.03568	0.755494	-22.5105	0.194305	-0.194305	1	-22.8392	1.09776	-1.09776	0.31232	-23.0929	0.851703	-0.851703	1	-23.381	-0.0364162	0.0364162	0.675348
CUT515	bothEndsMapped	-19.4499	-5.08188	5.08188	5.5884e-09	-16.5437	-0.542375	0.542375	0.152589	-16.6713	-0.0407106	0.0407106	0.924536	-19.1354	5.59677	-5.59677	6.21099e-16	-19.2237	5.10821	-5.10821	7.43786e-14
CUT516	bothEndsMapped	-19.5068	-2.96803	2.96803	0.000169138	-18.0253	0.208855	-0.208855	0.616549	-18.0362	0.477319	-0.477319	0.231099	-19.5637	2.7401	-2.7401	2.85796e-05	-19.5365	2.4826	-2.4826	9.58758e-05
CUT517	bothEndsMapped	-34.8736	-30.2849	30.2849	9.46431e-05	-19.715	0.15896	-0.15896	0.81081	-19.8618	0.69947	-0.69947	0.128495	-34.939	30.1541	-30.1541	0.000168248	-35.1191	29.7939	-29.7939	0.000371008
CUT518	bothEndsMapped	-35.002	-30.0281	30.0281	0.000237726	-20.3316	0.88232	-0.88232	0.106949	-19.8477	0.161273	-0.161273	0.72422	-35.4274	29.1772	-29.1772	0.00233634	-34.9779	30.0763	-30.0763	6.69963e-05
CUT519	mapped5	-22.8464	-1.45886	1.45886	0.426895	-21.9235	-0.158078	0.158078	0.855027	-21.7701	-0.218475	0.218475	0.759544	-22.7147	1.60812	-1.60812	0.552955	-22.5239	1.67784	-1.67784	0.456405
CUT520	bothEndsMapped	-35.0964	-29.8394	29.8394	0.000511929	-20.0348	-0.117734	0.117734	0.943024	-20.1359	0.331659	-0.331659	0.494802	-35.0271	29.9779	-29.9779	0.000555406	-35.1646	29.7029	-29.7029	0.000731108
CUT521	mapped3	-21.5311	-2.08951	2.08951	0.0895564	-20.2003	-0.366445	0.366445	0.53172	-19.7987	-0.922954	0.922954	0.0537822	-21.3023	2.43289	-2.43289	0.0246146	-20.8588	3.00807	-3.00807	0.000801728
CUT522	bothEndsMapped	-20.8058	-0.896096	0.896096	0.312474	-19.7879	-0.942694	0.942694	0.0577083	-19.6432	-0.985468	0.985468	0.035654	-20.2871	1.81938	-1.81938	0.0191859	-20.1092	1.86331	-1.86331	0.0121991
CUT523	bothEndsMapped	-22.1687	0.355732	-0.355732	0.800933	-21.887	-0.695774	0.695774	0.38484	-21.8683	-0.486665	0.486665	0.62184	-21.7745	0.318529	-0.318529	0.805821	-21.7074	0.140857	-0.140857	1
CUT524	bothEndsMapped	-21.4347	-2.28229	2.28229	0.0524823	-20.1126	-0.150776	0.150776	0.764182	-20.2723	0.415206	-0.415206	0.462123	-21.3107	2.41608	-2.41608	0.0229156	-21.4337	1.85831	-1.85831	0.0832313
CUT525	mapped5	-36.5279	-26.9762	26.9762	0.205111	-24.0415	2.25063	-2.25063	0.14514	-23.4292	1.27207	-1.27207	0.536332	-37.6247	24.7828	-24.7828	1	-37.0551	25.922	-25.922	0.564576
CUT526	mapped5	-36.7283	-26.5755	26.5755	0.335543	-23.2495	-0.182416	0.182416	1	-23.3027	0.170805	-0.170805	1	-36.6215	26.789	-26.789	0.323241	-36.7076	26.6168	-26.6168	0.564576
CUT527	mapped3	-23.5357	-0.0801434	0.0801434	1	-23.7697	0.779534	-0.779534	1	-23.6853	0.857169	-0.857169	0.47741	-23.8734	-0.709254	0.709254	1	-23.7454	-0.765241	0.765241	0.612956
CUT528	bothEndsMapped	-20.5333	-2.91515	2.91515	0.0014727	-19.2738	0.590021	-0.590021	0.196711	-19.066	0.421303	-0.421303	0.338335	-20.7848	2.298	-2.298	0.00866024	-20.5391	2.47749	-2.47749	0.0027799
CUT529	bothEndsMapped	-20.6849	-3.78185	3.78185	8.97881e-05	-18.8055	0.242603	-0.242603	0.595864	-18.7103	0.298776	-0.298776	0.474216	-20.7537	3.53002	-3.53002	6.4533e-05	-20.6193	3.48711	-3.48711	7.76981e-05
CUT530	mapped3	-50.0161	0	0	1	-50.0161	0	0	1	-50.0161	0	0	1	-50.0161	0	0	1	-50.0161	0	0	1
CUT531	mapped3	-36.511	-27.0101	27.0101	0.205111	-23.5256	1.2677	-1.2677	0.536122	-22.2867	-0.963532	0.963532	0.196356	-37.122	25.7881	-25.7881	1	-35.9286	28.1749	-28.1749	0.0184837
CUT532	bothEndsMapped	-19.9042	-5.34327	5.34327	1.06291e-08	-17.4599	0.665653	-0.665653	0.0886433	-17.0736	0.139614	-0.139614	0.716924	-20.1864	4.66468	-4.66468	2.56191e-09	-19.7622	5.20118	-5.20118	5.25314e-12
CUT533	mapped5	-36.511	-27.0101	27.0101	0.205111	-23.5256	1.2677	-1.2677	0.536122	-23.425	1.31307	-1.31307	0.379647	-37.122	25.7881	-25.7881	1	-37.0608	25.9106	-25.9106	1
CUT534	bothEndsMapped	-50.0161	0	0	1	-50.0161	0	0	1	-50.0161	0	0	1	-50.0161	0	0	1	-50.0161	0	0	1
CUT535	bothEndsMapped	-21.3223	-1.33719	1.33719	0.223613	-21.3792	1.64377	-1.64377	0.00920589	-20.5851	0.302389	-0.302389	0.601963	-22.0961	-0.32472	0.32472	0.755387	-21.2702	1.01523	-1.01523	0.316289
CUT536	bothEndsMapped	-35.0177	-29.9967	29.9967	0.000298187	-20.3355	0.797607	-0.797607	0.122033	-20.054	0.481766	-0.481766	0.371473	-35.4053	29.2215	-29.2215	0.00233634	-35.1732	29.6857	-29.6857	0.000371008
CUT537	mapped5	-35.5387	-28.9548	28.9548	0.0202953	-20.9173	-0.0869361	0.0869361	1	-21.0701	0.465476	-0.465476	0.508127	-35.4748	29.0825	-29.0825	0.0035211	-35.6753	28.6815	-28.6815	0.0319564
CUT538	mapped5	-36.4095	-27.2131	27.2131	0.221984	-36.3539	27.3243	-27.3243	0.0210465	-22.9631	0.789146	-0.789146	0.615986	-50.0161	0	0	1	-36.6968	26.6385	-26.6385	0.322673
CUT539	mapped3	-19.6227	-3.90622	3.90622	2.20207e-06	-18.0878	1.06864	-1.06864	0.00887281	-18.013	1.16546	-1.16546	0.00359296	-20.1031	2.83137	-2.83137	0.000121041	-19.9883	2.74907	-2.74907	8.87767e-05
CUT540	mapped3	-37.1171	-25.7979	25.7979	1	-37.0611	25.9098	-25.9098	0.261521	-24.3379	0.709766	-0.709766	1	-50.0161	0	0	1	-37.3624	25.3074	-25.3074	1
CUT541	mapped3	-21.5833	-0.815143	0.815143	0.623189	-21.3502	0.521053	-0.521053	0.4156	-20.445	-1.04203	1.04203	0.0548849	-21.8018	0.263951	-0.263951	1	-20.8644	1.82691	-1.82691	0.0371796
CUT542	mapped3	-35.0703	-29.8916	29.8916	0.000616732	-19.8741	-0.28544	0.28544	0.597322	-19.8747	-0.0377063	0.0377063	1	-34.907	30.218	-30.218	0.000123086	-34.9433	30.1456	-30.1456	3.6038e-05
CUT543	bothEndsMapped	-18.9999	-3.15173	3.15173	1.95002e-05	-17.3728	0.0979967	-0.0979967	0.796978	-17.1044	-0.192209	0.192209	0.627715	-19.002	3.03346	-3.03346	4.397e-07	-18.695	3.33568	-3.33568	8.1576e-09
CUT544	mapped3	-21.4889	-4.17378	4.17378	0.000284541	-19.5762	0.556011	-0.556011	0.250758	-19.5441	0.738358	-0.738358	0.112349	-21.7213	3.59491	-3.59491	0.00154556	-21.6504	3.42492	-3.42492	0.00402664
CUT545	bothEndsMapped	-19.6926	-2.59656	2.59656	0.00077367	-18.402	0.228008	-0.228008	0.560766	-18.1688	0.00832748	-0.00832748	1	-19.7537	2.36006	-2.36006	0.000528245	-19.4867	2.58228	-2.58228	6.87047e-05
CUT546	bothEndsMapped	-19.113	-0.925645	0.925645	0.200074	-18.5981	0.0978874	-0.0978874	0.827394	-18.2763	-0.29907	0.29907	0.471062	-19.1151	0.807354	-0.807354	0.175326	-18.7545	1.2166	-1.2166	0.0232913
CUT547	bothEndsMapped	-20.715	-1.07782	1.07782	0.302283	-19.7477	-0.643738	0.643738	0.177899	-20.0108	0.128989	-0.128989	0.847371	-20.3411	1.71136	-1.71136	0.0337178	-20.5692	0.943425	-0.943425	0.220757
CUT548	mapped3	-20.7147	-0.552338	0.552338	0.65433	-20.4054	0.149125	-0.149125	0.861848	-20.4205	0.42605	-0.42605	0.477911	-20.7438	0.380054	-0.380054	0.754395	-20.7196	0.116412	-0.116412	1
CUT549	mapped5	-20.2929	-2.56585	2.56585	0.00360581	-18.481	-0.875399	0.875399	0.0406922	-18.7438	-0.102938	0.102938	0.833107	-19.8124	3.41275	-3.41275	9.41878e-07	-20.0394	2.64674	-2.64674	0.000189394
CUT550	bothEndsMapped	-34.6937	-30.6447	30.6447	1.36305e-05	-19.434	0.316805	-0.316805	0.472725	-19.0974	-0.109451	0.109451	0.822475	-34.8318	30.3685	-30.3685	7.47124e-05	-34.5425	30.9471	-30.9471	7.27752e-07
CUT551	mapped3	-20.3573	-2.43709	2.43709	0.00648786	-18.7424	-0.565003	0.565003	0.174948	-18.8151	-0.173231	0.173231	0.679135	-20.0225	2.99247	-2.99247	3.99657e-05	-20.0567	2.61222	-2.61222	0.000268016
CUT552	mapped3	-37.1073	-25.8176	25.8176	1	-23.8428	-0.49941	0.49941	1	-24.8277	1.71716	-1.71716	0.636351	-36.8362	26.3598	-26.3598	0.564941	-37.8601	24.3118	-24.3118	1
CUT553	mapped3	-22.1236	0.265581	-0.265581	0.800933	-22.2512	0.231201	-0.231201	1	-23.0552	2.08529	-2.08529	0.0574082	-22.1824	-0.497299	0.497299	0.755387	-22.9473	-2.33897	2.33897	0.0531226
CUT554	mapped3	-18.7771	-0.55035	0.55035	0.442083	-18.2188	-0.363934	0.363934	0.388273	-18.2015	-0.151839	0.151839	0.713854	-18.5472	0.895933	-0.895933	0.0889179	-18.4938	0.690992	-0.690992	0.189412
CUT555	bothEndsMapped	-22.519	-0.113652	0.113652	1	-21.8876	-0.937305	0.937305	0.221516	-21.9115	-0.642759	0.642759	0.409755	-22.0073	1.02279	-1.02279	0.45804	-21.9865	0.75253	-0.75253	0.637798
CUT556	mapped3	-35.6604	-28.7113	28.7113	0.0248723	-21.4101	0.381011	-0.381011	0.573079	-20.7236	-0.744679	0.744679	0.239242	-35.8391	28.3539	-28.3539	0.0504403	-35.1969	29.6383	-29.6383	0.000731108
CUT557	bothEndsMapped	-21.0539	-5.04373	5.04373	5.66494e-06	-18.4916	0.135582	-0.135582	0.747129	-18.4993	0.397606	-0.397606	0.35022	-21.0697	4.89803	-4.89803	7.69994e-07	-21.0413	4.643	-4.643	1.93325e-06
CUT558	bothEndsMapped	-35.8373	-28.3575	28.3575	0.0176816	-20.9001	-1.28386	1.28386	0.0284091	-21.5777	0.317561	-0.317561	0.778716	-35.17	29.6921	-29.6921	0.00197937	-35.8905	28.2512	-28.2512	0.0985698
CUT559	bothEndsMapped	-35.3496	-29.3329	29.3329	0.00388256	-20.2792	-0.639756	0.639756	0.292838	-20.0972	-0.756575	0.756575	0.151048	-35.0171	29.998	-29.998	0.000555406	-34.8775	30.2771	-30.2771	8.90459e-05
CUT560	mappedNone	-21.374	-2.4036	2.4036	0.0380782	-20.2172	0.312719	-0.312719	0.580489	-20.1363	0.397488	-0.397488	0.494802	-21.4776	2.08228	-2.08228	0.0345177	-21.3635	1.9986	-1.9986	0.0521346
CUT561	bothEndsMapped	-19.2455	-0.660705	0.660705	0.385977	-19.0621	0.504197	-0.504197	0.253227	-18.6745	-0.0245526	0.0245526	0.9767	-19.4486	0.14018	-0.14018	0.859882	-19.0192	0.68729	-0.68729	0.249111
CUT562	bothEndsMapped	-20.2626	-1.45649	1.45649	0.0954156	-19.466	0.0593879	-0.0593879	0.916281	-19.2342	-0.15735	0.15735	0.775754	-20.2452	1.37709	-1.37709	0.0714652	-19.9785	1.59869	-1.59869	0.0208579
CUT563	bothEndsMapped	-35.2984	-29.4352	29.4352	0.0029662	-20.1801	-0.58825	0.58825	0.243739	-20.2385	-0.224808	0.224808	0.617303	-34.9833	30.0655	-30.0655	0.000466225	-35.0904	29.8513	-29.8513	0.000153482
CUT564	mapped5	-35.6303	-28.7714	28.7714	0.0282106	-20.6472	-1.02082	1.02082	0.103107	-21.0911	0.114144	-0.114144	0.911021	-35.1079	29.8163	-29.8163	0.00162226	-35.5927	28.8466	-28.8466	0.0214401
CUT565	bothEndsMapped	-35.5975	-28.8372	28.8372	0.0282106	-21.2718	0.414609	-0.414609	0.588082	-20.4679	-0.946809	0.946809	0.0661915	-35.7791	28.474	-28.474	0.0303834	-35.0179	29.9963	-29.9963	0.000131163
CUT566	bothEndsMapped	-20.193	-3.59577	3.59577	3.84078e-05	-18.2464	-0.111945	0.111945	0.821647	-18.1097	-0.138543	0.138543	0.745383	-20.0931	3.68141	-3.68141	1.44508e-06	-19.9192	3.71724	-3.71724	2.74136e-07
CUT567	mapped5	-34.352	-31.328	31.328	1.88812e-07	-18.3126	-0.582648	0.582648	0.170102	-18.4572	-0.0466004	0.0466004	0.919711	-34.0498	31.9326	-31.9326	1.36857e-10	-34.2383	31.5555	-31.5555	1.09382e-08
CUT568	bothEndsMapped	-20.981	-1.18963	1.18963	0.250467	-19.9381	-0.716069	0.716069	0.15885	-19.89	-0.565178	0.565178	0.265224	-20.5821	1.8733	-1.8733	0.0147618	-20.4951	1.73549	-1.73549	0.0268555
CUT569	mapped5	-37.9117	-24.2087	24.2087	1	-37.8549	24.3222	-24.3222	1	-25.6199	0.0985535	-0.0985535	1	-50.0161	0	0	1	-37.8543	24.3236	-24.3236	1
CUT570	mapped3	-36.0841	-27.864	27.864	0.0627738	-21.3205	-1.47611	1.47611	0.0327471	-21.8357	-0.198592	0.198592	0.875626	-35.3263	29.3796	-29.3796	0.00174377	-35.8905	28.2512	-28.2512	0.0985698
CUT571	bothEndsMapped	-19.1533	-1.67506	1.67506	0.0198002	-18.1106	-0.219889	0.219889	0.613368	-18.1302	0.0661339	-0.0661339	0.885606	-18.999	1.8696	-1.8696	0.00108209	-18.9815	1.5927	-1.5927	0.00440558
CUT572	bothEndsMapped	-20.7578	-1.63595	1.63595	0.0818038	-19.6492	-0.40389	0.40389	0.422092	-19.6253	-0.20463	0.20463	0.722475	-20.5168	2.00379	-2.00379	0.0078089	-20.4541	1.81749	-1.81749	0.0155674
CUT573	mapped5	-37.9117	-24.2087	24.2087	1	-37.8549	24.3222	-24.3222	1	-37.7933	24.4455	-24.4455	1	-50.0161	0	0	1	-50.0161	0	0	1
CUT574	mapped5	-37.3953	-25.2415	25.2415	1	-24.9258	0.509102	-0.509102	1	-37.2819	25.4683	-25.4683	0.507742	-37.6294	24.7732	-24.7732	1	-50.0161	0	0	1
CUT575	bothEndsMapped	-21.7772	-3.59719	3.59719	0.00399845	-20.1167	0.477452	-0.477452	0.332485	-20.0579	0.606639	-0.606639	0.249453	-21.9656	3.10637	-3.10637	0.0111579	-21.8808	2.96402	-2.96402	0.0115235
CUT576	bothEndsMapped	-35.455	-29.1221	29.1221	0.00814382	-20.893	0.216371	-0.216371	0.736875	-21.437	1.55086	-1.55086	0.0157446	-35.5411	28.95	-28.95	0.00863981	-36.1251	27.7819	-27.7819	0.0720844
CUT577	bothEndsMapped	-20.3574	-3.26687	3.26687	0.000268848	-18.8304	0.4243	-0.4243	0.334145	-18.8164	0.642747	-0.642747	0.131067	-20.5192	2.82925	-2.82925	0.000431787	-20.4674	2.6208	-2.6208	0.00109054
CUT578	mapped5	-19.6551	-2.67151	2.67151	0.000576879	-18.3185	0.222436	-0.222436	0.618273	-17.9483	-0.271493	0.271493	0.496161	-19.7144	2.43866	-2.43866	0.000314577	-19.3034	2.94885	-2.94885	3.12365e-06
CUT579	mapped5	-20.2336	-2.68436	2.68436	0.00215224	-18.9798	0.405593	-0.405593	0.365975	-18.7076	0.107622	-0.107622	0.835581	-20.3808	2.27587	-2.27587	0.00422864	-20.0725	2.58071	-2.58071	0.000292567
CUT580	mapped5	-20.6315	-1.88869	1.88869	0.0368317	-19.5449	-0.092763	0.092763	0.87037	-19.5268	0.117827	-0.117827	0.809508	-20.5429	1.95168	-1.95168	0.00982418	-20.4868	1.752	-1.752	0.0283209
CUT581	mapped5	-21.3692	-4.41315	4.41315	8.94267e-05	-18.8319	-0.47316	0.47316	0.299296	-18.9557	0.0213416	-0.0213416	0.972406	-21.0887	4.86	-4.86	1.18663e-06	-21.1741	4.3775	-4.3775	1.87495e-05
CUT582	mapped3	-22.2276	-0.696321	0.696321	0.819717	-21.5268	-0.492655	0.492655	0.539234	-21.5811	-0.13751	0.13751	1	-21.9302	1.177	-1.177	0.45804	-21.9471	0.831442	-0.831442	0.644058
CUT583	bothEndsMapped	-20.1609	-2.82983	2.82983	0.00114543	-18.2888	-0.6832	0.6832	0.0914873	-18.3922	-0.230075	0.230075	0.575045	-19.7643	3.50894	-3.50894	4.72622e-07	-19.8292	3.06718	-3.06718	1.25762e-05
CUT584	mapped5	-21.5006	-0.980436	0.980436	0.524148	-21.0386	0.304884	-0.304884	0.720213	-20.8882	0.250046	-0.250046	0.758688	-21.5927	0.682242	-0.682242	0.645373	-21.4018	0.752028	-0.752028	0.575417
CUT585	mapped5	-34.1001	-31.8319	31.8319	5.20998e-08	-17.9055	-0.38175	0.38175	0.354763	-17.9374	-0.0712235	0.0712235	0.884551	-33.8975	32.237	-32.237	5.01568e-12	-33.9693	32.0935	-32.0935	3.66179e-11
CUT586	bothEndsMapped	-35.7145	-28.6031	28.6031	0.0477971	-21.5173	0.429986	-0.429986	0.652785	-21.4578	0.557352	-0.557352	0.506816	-35.9042	28.2237	-28.2237	0.0451569	-35.8905	28.2512	-28.2512	0.0985698
CUT587	bothEndsMapped	-21.0361	-3.0794	3.0794	0.00245975	-18.9431	-0.943001	0.943001	0.0359389	-19.1593	-0.263567	0.263567	0.614756	-20.5267	3.98412	-3.98412	1.4553e-06	-20.7057	3.31429	-3.31429	0.000100008
CUT588	mapped3	-35.1053	-29.8215	29.8215	0.00064935	-20.3556	0.553686	-0.553686	0.353084	-20.3335	0.755828	-0.755828	0.155604	-35.3581	29.3158	-29.3158	0.00174377	-35.3748	29.2826	-29.2826	0.00356827
CUT589	mapped5	-22.4134	0.8452	-0.8452	0.370412	-23.1607	0.889983	-0.889983	0.536122	-22.5623	-0.0607336	0.0607336	1	-22.7996	-1.73162	1.73162	0.109271	-22.1618	-0.767925	0.767925	0.38956
CUT590	bothEndsMapped	-21.0687	-3.01413	3.01413	0.00308639	-19.6182	0.325269	-0.325269	0.531645	-19.3297	-0.00520839	0.00520839	1	-21.1819	2.67365	-2.67365	0.00883807	-20.8542	3.01717	-3.01717	0.000801728
CUT591	mapped3	-34.8878	-30.2565	30.2565	0.000118167	-20.1289	0.955975	-0.955975	0.0566909	-19.8687	0.682024	-0.682024	0.161194	-35.3418	29.3485	-29.3485	0.00174377	-35.126	29.7802	-29.7802	0.00043075
CUT592	bothEndsMapped	-20.8496	-3.45246	3.45246	0.000407777	-19.2807	0.523698	-0.523698	0.263687	-18.8946	-0.00188116	0.00188116	1	-21.0618	2.91382	-2.91382	0.00252361	-20.639	3.44764	-3.44764	8.3953e-05
CUT593	mapped5	-34.9215	-30.1892	30.1892	0.000146332	-19.6766	-0.0914158	0.0914158	0.952654	-19.227	-0.744095	0.744095	0.0920218	-34.8525	30.3271	-30.3271	0.000103426	-34.4442	31.1438	-31.1438	1.31317e-07
CUT594	bothEndsMapped	-35.1934	-29.6454	29.6454	0.00152273	-20.4275	0.342648	-0.342648	0.537107	-20.342	0.417919	-0.417919	0.444268	-35.3386	29.3549	-29.3549	0.00174377	-35.2932	29.4458	-29.4458	0.0018774
CUT595	bothEndsMapped	-36.166	-27.7001	27.7001	0.0552824	-22.4042	0.383563	-0.383563	0.824462	-21.931	-0.315998	0.315998	0.86958	-36.3372	27.3576	-27.3576	0.192139	-35.9043	28.2234	-28.2234	0.14982
CUT596	bothEndsMapped	-34.871	-30.29	30.29	9.46431e-05	-19.7638	0.257073	-0.257073	0.580978	-19.576	0.128519	-0.128519	0.765292	-34.986	30.0602	-30.0602	0.000466225	-34.8388	30.3545	-30.3545	5.77146e-05
CUT597	bothEndsMapped	-21.4341	-4.28342	4.28342	0.000144273	-19.1618	-0.0302533	0.0302533	0.964908	-19.1236	0.139609	-0.139609	0.788574	-21.3664	4.30467	-4.30467	1.49049e-05	-21.2881	4.14933	-4.14933	3.44046e-05
CUT598	bothEndsMapped	-21.234	-4.68362	4.68362	1.79674e-05	-19.3176	1.06899	-1.06899	0.0207091	-18.908	0.496195	-0.496195	0.255424	-21.7175	3.60247	-3.60247	0.00154556	-21.269	4.18766	-4.18766	3.1287e-05
CUT599	mapped3	-22.2726	-2.60639	2.60639	0.122217	-20.8555	0.00225217	-0.00225217	1	-20.5845	-0.293409	0.293409	0.601963	-22.2193	2.59883	-2.59883	0.079176	-21.9162	2.89331	-2.89331	0.0142984
CUT600	bothEndsMapped	-21.7098	-1.73206	1.73206	0.125114	-20.1072	-1.27686	1.27686	0.0115835	-20.3038	-0.63672	0.63672	0.237595	-21.0261	2.98525	-2.98525	0.00215181	-21.1833	2.359	-2.359	0.01256
CUT601	bothEndsMapped	-21.0913	-2.96907	2.96907	0.00430445	-19.7279	0.463706	-0.463706	0.400829	-19.5367	0.327698	-0.327698	0.496307	-21.275	2.48753	-2.48753	0.0185619	-21.0429	2.63992	-2.63992	0.00619683
CUT602	mapped3	-23.1316	-0.888361	0.888361	1	-23.871	2.6187	-2.6187	0.0874568	-22.4921	0.107017	-0.107017	1	-24.3808	-1.72409	1.72409	0.552398	-22.9593	0.806993	-0.806993	1
CUT603	mapped3	-35.9889	-28.0544	28.0544	0.0627738	-22.0949	0.520742	-0.520742	0.706605	-21.4856	-0.451987	0.451987	0.416271	-36.2193	27.5935	-27.5935	0.206438	-35.6506	28.7308	-28.7308	0.0319564
CUT604	bothEndsMapped	-21.4064	-4.33873	4.33873	0.000121774	-18.8677	-0.516396	0.516396	0.223996	-18.9737	-0.0580217	0.0580217	0.888485	-21.0952	4.84711	-4.84711	1.48569e-06	-21.1647	4.39627	-4.39627	1.71701e-05
CUT605	bothEndsMapped	-18.8533	-0.0440415	0.0440415	1	-18.4592	-0.534116	0.534116	0.200616	-18.6179	0.0299216	-0.0299216	0.932665	-18.5404	0.555757	-0.555757	0.311982	-18.6557	0.0132888	-0.0132888	0.959282
CUT606	bothEndsMapped	-18.7491	-2.48351	2.48351	0.000386206	-17.8253	0.852306	-0.852306	0.0328986	-17.1793	-0.193287	0.193287	0.617828	-19.1243	1.61891	-1.61891	0.00563073	-18.4396	2.67654	-2.67654	6.97376e-07
CUT607	bothEndsMapped	-20.6164	-2.74888	2.74888	0.00316238	-18.9733	-0.354317	0.354317	0.455653	-19.2841	0.514235	-0.514235	0.244621	-20.3953	3.07686	-3.07686	7.17683e-05	-20.6709	2.21398	-2.21398	0.00967421
CUT608	bothEndsMapped	-35.4953	-29.0414	29.0414	0.0108996	-21.118	0.496845	-0.496845	0.465406	-20.9442	0.395704	-0.395704	0.459899	-35.7234	28.5853	-28.5853	0.0187993	-35.5838	28.8644	-28.8644	0.0214401
CUT609	bothEndsMapped	-20.3171	-4.51736	4.51736	2.47978e-06	-18.0948	0.277061	-0.277061	0.495427	-17.9163	0.16675	-0.16675	0.679625	-20.4075	4.22244	-4.22244	1.84305e-07	-20.1914	4.34283	-4.34283	3.17901e-08
CUT610	bothEndsMapped	-20.0002	-2.5073	2.5073	0.002878	-18.6399	-0.0320901	0.0320901	1	-18.608	0.150957	-0.150957	0.717977	-19.9407	2.51225	-2.51225	0.000344578	-19.8735	2.33476	-2.33476	0.000636931
CUT611	mapped3	-35.2212	-29.5897	29.5897	0.00152273	-20.1787	-0.313938	0.313938	0.639299	-19.9401	-0.544014	0.544014	0.304383	-35.0462	29.9397	-29.9397	0.000782432	-34.8538	30.3245	-30.3245	7.76134e-05
CUT612	bothEndsMapped	-20.5192	-2.94322	2.94322	0.00129095	-18.7346	-0.432064	0.432064	0.325018	-18.7924	-0.0696282	0.0696282	0.900777	-20.2555	3.35647	-3.35647	2.4259e-05	-20.2782	2.99927	-2.99927	7.97263e-05
CUT613	bothEndsMapped	-35.5572	-28.9176	28.9176	0.0147785	-20.5024	-1.02677	1.02677	0.0901668	-21.1306	0.476981	-0.476981	0.432668	-35.0326	29.967	-29.967	0.000555406	-35.7011	28.6299	-28.6299	0.0483076
CUT614	bothEndsMapped	-34.8908	-30.2504	30.2504	9.53644e-05	-19.7996	0.287345	-0.287345	0.615352	-19.5212	-0.0229916	0.0229916	0.961556	-35.0135	30.0052	-30.0052	0.000400083	-34.7784	30.4754	-30.4754	2.19579e-05
CUT615	mapped5	-20.0541	-5.04336	5.04336	7.54242e-08	-17.8384	0.82508	-0.82508	0.0369989	-17.6159	0.62661	-0.62661	0.107127	-20.4156	4.2062	-4.2062	2.22636e-07	-20.1553	4.41497	-4.41497	1.31625e-08
CUT616	mapped5	-20.4617	-2.22828	2.22828	0.0159124	-19.5339	0.579281	-0.579281	0.214338	-19.0297	-0.182634	0.182634	0.690444	-20.6999	1.63758	-1.63758	0.0573664	-20.1601	2.40548	-2.40548	0.00122951
CUT617	bothEndsMapped	-21.3934	-4.36484	4.36484	8.81923e-05	-18.9087	-0.415702	0.415702	0.349095	-18.9153	-0.155787	0.155787	0.737073	-21.1425	4.75247	-4.75247	3.06797e-06	-21.1105	4.50471	-4.50471	8.48208e-06
CUT618	bothEndsMapped	-35.0277	-29.9767	29.9767	0.000376941	-20.7082	1.54175	-1.54175	0.00833118	-20.384	1.13996	-1.13996	0.0282067	-35.7791	28.474	-28.474	0.0303834	-35.4973	29.0375	-29.0375	0.0109414
CUT619	bothEndsMapped	-21.2723	0.0369072	-0.0369072	0.873973	-21.0897	-0.176994	0.176994	0.901769	-20.8801	-0.349683	0.349683	0.608353	-21.1314	0.130761	-0.130761	1	-20.8804	0.320914	-0.320914	0.87917
CUT620	bothEndsMapped	-20.3868	-1.20803	1.20803	0.178496	-19.831	0.289732	-0.289732	0.522922	-19.39	-0.345495	0.345495	0.449629	-20.486	0.895589	-0.895589	0.285906	-20.0097	1.53632	-1.53632	0.0275576
CUT621	bothEndsMapped	-22.247	-2.65756	2.65756	0.0946544	-20.6149	-0.399253	0.399253	0.495472	-20.5561	-0.270217	0.270217	0.610212	-21.9995	3.03856	-3.03856	0.0154029	-21.9091	2.90733	-2.90733	0.0106284
CUT622	mapped5	-34.8496	-30.3329	30.3329	7.62644e-05	-19.8228	0.506609	-0.506609	0.340865	-19.4428	-0.00698103	0.00698103	1	-35.079	29.874	-29.874	0.00111861	-34.7358	30.5606	-30.5606	1.27126e-05
CUT623	mapped5	-22.598	-1.95567	1.95567	0.180995	-22.8428	2.65958	-2.65958	0.0175133	-21.728	0.676554	-0.676554	0.452989	-23.8781	-0.718622	0.718622	1	-22.728	1.26959	-1.26959	0.551865
CUT624	bothEndsMapped	-22.4338	-2.28409	2.28409	0.182421	-20.7837	-0.820278	0.820278	0.20858	-20.6095	-0.921856	0.921856	0.122525	-21.9776	3.08228	-3.08228	0.0111579	-21.7589	3.20779	-3.20779	0.0102276
CUT625	bothEndsMapped	-37.1268	-25.7785	25.7785	1	-37.068	25.8962	-25.8962	0.507681	-24.031	0.0684696	-0.0684696	1	-50.0161	0	0	1	-37.0551	25.922	-25.922	0.564576
CUT626	mapped3	-20.3751	-2.40138	2.40138	0.00838062	-19.0389	-0.0596555	0.0596555	0.902578	-18.8927	-0.105481	0.105481	0.791751	-20.2991	2.43927	-2.43927	0.00171367	-20.1172	2.49114	-2.49114	0.000457085
CUT627	mapped3	-35.735	-28.5621	28.5621	0.0477971	-21.847	0.993472	-0.993472	0.24595	-21.0706	-0.312599	0.312599	0.659478	-36.2151	27.602	-27.602	0.206438	-35.4814	29.0693	-29.0693	0.00740752
CUT628	mapped3	-36.0841	-27.864	27.864	0.0627738	-22.2241	0.331025	-0.331025	0.68889	-21.6027	-0.664602	0.664602	0.397543	-36.232	27.5681	-27.5681	0.206438	-35.6549	28.7224	-28.7224	0.0319564
CUT629	mappedNone	-35.5006	-29.031	29.031	0.0147785	-21.1834	0.611304	-0.611304	0.368778	-20.8583	0.207646	-0.207646	0.686121	-35.7829	28.4664	-28.4664	0.0303834	-35.4951	29.0419	-29.0419	0.0164038
CUT630	mapped5	-21.3891	-4.37345	4.37345	8.81923e-05	-19.4041	0.594592	-0.594592	0.218274	-18.9761	-0.0146981	0.0146981	1	-21.6456	3.74625	-3.74625	0.000698361	-21.1769	4.37182	-4.37182	1.87495e-05
CUT631	mapped5	-21.594	1.20628	-1.20628	0.160648	-21.9841	-0.215497	0.215497	1	-21.8586	-0.219802	0.219802	0.875626	-21.4342	-1.00087	1.00087	0.229923	-21.276	-0.996301	0.996301	0.222878
CUT632	mapped5	-21.2265	-1.52872	1.52872	0.161158	-20.1108	-0.492171	0.492171	0.366599	-20.3513	0.235603	-0.235603	0.699769	-20.9303	2.00696	-2.00696	0.0264827	-21.1333	1.28914	-1.28914	0.229797
CUT633	bothEndsMapped	-21.5771	-3.99749	3.99749	0.000608471	-19.4293	-0.0799063	0.0799063	0.877163	-19.5398	0.387575	-0.387575	0.405376	-21.4863	4.06482	-4.06482	7.6233e-05	-21.5588	3.60803	-3.60803	0.00115961
CUT634	bothEndsMapped	-21.3173	-1.34709	1.34709	0.223613	-20.9396	0.814737	-0.814737	0.181982	-20.9319	1.04595	-1.04595	0.085939	-21.6747	0.518062	-0.518062	0.639101	-21.6324	0.290809	-0.290809	1
CUT635	mapped3	-21.1576	-0.836458	0.836458	0.504163	-20.8221	0.376129	-0.376129	0.519961	-20.5804	0.13944	-0.13944	0.79209	-21.2959	0.445642	-0.445642	0.840586	-21.0109	0.703805	-0.703805	0.527673
CUT636	mapped5	-36.052	-27.9281	27.9281	0.0627738	-21.7806	-0.400855	0.400855	0.735889	-22.2702	0.824803	-0.824803	0.329802	-35.8313	28.3695	-28.3695	0.0504403	-36.3588	27.3145	-27.3145	0.205719
CUT637	bothEndsMapped	-35.7817	-28.4686	28.4686	0.0613889	-21.0701	-0.738025	0.738025	0.221434	-20.6361	-1.35937	1.35937	0.0144414	-35.392	29.2481	-29.2481	0.00273307	-34.9936	30.0449	-30.0449	9.31349e-05
CUT638	mapped5	-34.4416	-31.1488	31.1488	7.96604e-07	-18.7082	-0.115096	0.115096	0.814453	-18.3806	-0.523623	0.523623	0.205017	-34.3654	31.3014	-31.3014	6.28292e-08	-34.0773	31.8774	-31.8774	4.05514e-10
CUT639	mapped5	-22.6157	0.0797673	-0.0797673	0.767137	-22.6962	0.315695	-0.315695	1	-22.4804	0.130402	-0.130402	1	-22.7183	-0.39912	0.39912	0.705313	-22.4593	-0.193007	0.193007	0.754817
CUT640	bothEndsMapped	-20.3605	-1.2607	1.2607	0.16251	-19.3903	-0.480863	0.480863	0.316525	-19.2981	-0.418551	0.418551	0.376378	-20.074	1.71965	-1.71965	0.0143947	-19.9424	1.67085	-1.67085	0.0127696
CUT641	mapped3	-36.2391	-27.5539	27.5539	0.0851333	-22.6112	0.509823	-0.509823	0.810362	-22.2293	-0.00725183	0.00725183	1	-36.4713	27.0894	-27.0894	0.323241	-36.13	27.772	-27.772	0.0720844
CUT642	mapped5	-35.1131	-29.8059	29.8059	0.00083094	-20.3799	0.554137	-0.554137	0.305203	-20.1849	0.410766	-0.410766	0.395083	-35.368	29.2962	-29.2962	0.00273307	-35.2101	29.6118	-29.6118	0.00104969
CUT643	bothEndsMapped	-35.6074	-28.8173	28.8173	0.0282106	-20.5866	-1.04156	1.04156	0.0879748	-20.9245	-0.118721	0.118721	0.918471	-35.0678	29.8965	-29.8965	0.00111861	-35.451	29.13	-29.13	0.00740752
CUT644	bothEndsMapped	-19.6656	-2.65049	2.65049	0.000581866	-18.2558	0.0329712	-0.0329712	0.939732	-18.4142	0.596506	-0.596506	0.150023	-19.6339	2.59977	-2.59977	9.952e-05	-19.7572	2.04128	-2.04128	0.00230617
CUT645	bothEndsMapped	-21.0089	-5.13373	5.13373	3.36534e-06	-18.3592	0.0457768	-0.0457768	0.935651	-18.2996	0.172998	-0.172998	0.678672	-20.9829	5.07173	-5.07173	1.65317e-07	-20.8844	4.95687	-4.95687	1.19465e-07
CUT646	bothEndsMapped	-21.3029	-4.5459	4.5459	3.60277e-05	-18.6744	-0.526889	0.526889	0.23145	-18.651	-0.326852	0.326852	0.442665	-20.9961	5.04535	-5.04535	2.49626e-07	-20.9384	4.84888	-4.84888	3.02796e-07
CUT647	mapped3	-19.3192	-0.699471	0.699471	0.367016	-19.1626	0.593785	-0.593785	0.178995	-18.4366	-0.611638	0.611638	0.136899	-19.5668	0.0900722	-0.0900722	1	-18.8035	1.3048	-1.3048	0.0148344
CUT648	mapped3	-37.1171	-25.7979	25.7979	1	-24.6433	1.07407	-1.07407	1	-36.9995	26.0331	-26.0331	0.261612	-37.6294	24.7732	-24.7732	1	-50.0161	0	0	1
CUT649	bothEndsMapped	-35.8631	-28.3059	28.3059	0.0176816	-21.9782	0.754167	-0.754167	0.475834	-21.1665	-0.622695	0.622695	0.29671	-36.2193	27.5935	-27.5935	0.206438	-35.4522	29.1277	-29.1277	0.00509791
CUT650	bothEndsMapped	-34.1896	-31.653	31.653	1.90362e-07	-18.4172	0.312048	-0.312048	0.435886	-18.1051	-0.0655521	0.0655521	0.886774	-34.3247	31.3827	-31.3827	2.44011e-08	-34.0525	31.9271	-31.9271	3.04176e-10
CUT651	mapped3	-36.3759	-27.2804	27.2804	0.135458	-22.142	-1.0023	1.0023	0.421635	-22.2188	-0.601496	0.601496	0.583316	-35.8544	28.3232	-28.3232	0.0504403	-35.9845	28.063	-28.063	0.0299618
CUT652	mapped3	-21.3825	-4.38656	4.38656	8.81923e-05	-19.326	0.49941	-0.49941	0.269747	-18.7933	-0.31971	0.31971	0.453414	-21.576	3.88542	-3.88542	0.000279856	-21.0084	4.70886	-4.70886	1.23196e-06
CUT653	bothEndsMapped	-34.8119	-30.4084	30.4084	4.13729e-05	-19.2904	-0.426795	0.426795	0.346618	-19.6805	0.600097	-0.600097	0.228265	-34.5791	30.8739	-30.8739	1.58008e-06	-35.0119	30.0083	-30.0083	9.31349e-05
CUT654	mapped3	-18.897	-1.54393	1.54393	0.0264787	-18.4268	0.834398	-0.834398	0.0483099	-17.91	0.0470985	-0.0470985	0.914068	-19.2613	0.701041	-0.701041	0.231695	-18.7031	1.50568	-1.50568	0.00637472
CUT655	bothEndsMapped	-19.2371	-4.03364	4.03364	4.09218e-07	-17.143	0.0667191	-0.0667191	0.882629	-17.1244	0.276129	-0.276129	0.474201	-19.2184	3.95684	-3.95684	1.3638e-09	-19.1613	3.75927	-3.75927	5.1295e-09
CUT656	bothEndsMapped	-21.136	-4.87956	4.87956	1.82419e-05	-18.4617	-0.275774	0.275774	0.529142	-18.26	-0.432428	0.432428	0.28659	-20.9539	5.12958	-5.12958	1.08786e-07	-20.715	5.29564	-5.29564	3.56953e-09
CUT657	mapped3	-20.5703	-2.84109	2.84109	0.00229087	-19.3952	0.708453	-0.708453	0.125561	-19.3355	0.835508	-0.835508	0.0594699	-20.8735	2.12047	-2.12047	0.0160695	-20.7718	2.012	-2.012	0.0201045
CUT658	mapped3	-35.7794	-28.4732	28.4732	0.0675844	-21.8278	0.746612	-0.746612	0.308739	-20.8207	-1.02033	1.02033	0.075512	-36.1373	27.7576	-27.7576	0.206438	-35.1768	29.6784	-29.6784	0.000516931
CUT659	bothEndsMapped	-20.5056	-6.14046	6.14046	5.46176e-09	-17.8571	1.05843	-1.05843	0.00816877	-18.0153	1.62137	-1.62137	7.50449e-05	-20.9843	5.06895	-5.06895	1.65317e-07	-21.1072	4.5113	-4.5113	5.5921e-06
CUT660	mapped5	-35.4825	-29.0671	29.0671	0.0108996	-20.8432	0.00954578	-0.00954578	1	-20.6018	-0.226835	0.226835	0.660241	-35.4646	29.103	-29.103	0.0035211	-35.2638	29.5046	-29.5046	0.00132198
CUT661	mapped3	-18.4549	-2.62715	2.62715	0.000146969	-17.2241	0.385889	-0.385889	0.326627	-17.0252	0.234542	-0.234542	0.541711	-18.5964	2.22998	-2.22998	3.75047e-05	-18.3583	2.39437	-2.39437	6.47861e-06
CUT662	mapped3	-35.8974	-28.2374	28.2374	0.0262834	-21.5301	-0.288402	0.288402	0.759246	-21.5589	0.0158228	-0.0158228	1	-35.7309	28.5703	-28.5703	0.0187993	-35.8042	28.4237	-28.4237	0.0655284
CUT663	bothEndsMapped	-35.7943	-28.4436	28.4436	0.0613889	-21.1444	-0.627364	0.627364	0.312435	-21.9196	1.16941	-1.16941	0.153878	-35.4577	29.1167	-29.1167	0.0035211	-36.2708	27.4905	-27.4905	0.120129
CUT664	bothEndsMapped	-35.393	-29.2462	29.2462	0.00688484	-20.2085	-0.918076	0.918076	0.088357	-20.0766	-0.935075	0.935075	0.063295	-34.9147	30.2027	-30.2027	0.000123086	-34.8237	30.3846	-30.3846	4.33336e-05
CUT665	mapped3	-19.2104	-2.73084	2.73084	0.000227061	-17.9477	0.428276	-0.428276	0.282629	-17.5994	-0.0218673	0.0218673	0.953244	-19.3715	2.29445	-2.29445	0.000277512	-18.985	2.75563	-2.75563	3.97446e-06
CUT666	bothEndsMapped	-22.2027	0.423636	-0.423636	0.800933	-21.801	-1.04092	1.04092	0.24595	-21.624	-1.14783	1.14783	0.100102	-21.6378	0.592035	-0.592035	0.639101	-21.4283	0.699047	-0.699047	0.575417
CUT667	bothEndsMapped	-34.2307	-31.5706	31.5706	3.06484e-07	-18.6858	0.65574	-0.65574	0.120623	-18.645	0.820917	-0.820917	0.0508097	-34.5456	30.9409	-30.9409	1.1176e-06	-34.5495	30.9332	-30.9332	5.92952e-07
CUT668	bothEndsMapped	-20.8666	-1.41837	1.41837	0.139201	-19.8399	-0.440658	0.440658	0.401764	-20.1561	0.438619	-0.438619	0.412236	-20.599	1.83947	-1.83947	0.0186047	-20.8804	0.96484	-0.96484	0.256791
CUT669	bothEndsMapped	-20.0464	-5.05888	5.05888	7.63248e-08	-17.7622	0.712939	-0.712939	0.0759606	-17.4134	0.261817	-0.261817	0.509358	-20.3511	4.33532	-4.33532	7.23138e-08	-19.9632	4.79925	-4.79925	6.06657e-10
CUT670	bothEndsMapped	-35.4111	-29.2099	29.2099	0.00932655	-20.7499	0.126876	-0.126876	1	-21.1803	1.23386	-1.23386	0.0367338	-35.4508	29.1305	-29.1305	0.00233634	-35.9135	28.205	-28.205	0.14982
CUT671	bothEndsMapped	-34.5863	-30.8595	30.8595	3.55235e-06	-19.2122	0.317066	-0.317066	0.498832	-18.5364	-0.787863	0.787863	0.0589476	-34.7252	30.5818	-30.5818	1.41722e-05	-34.0876	31.8569	-31.8569	6.75119e-10
CUT672	bothEndsMapped	-20.4451	-2.26152	2.26152	0.013931	-19.3699	0.323173	-0.323173	0.48969	-19.156	0.141858	-0.141858	0.784467	-20.5571	1.92329	-1.92329	0.0157638	-20.3041	2.11747	-2.11747	0.00757356
CUT673	bothEndsMapped	-19.8278	-2.32615	2.32615	0.00293845	-18.7641	0.399709	-0.399709	0.316597	-18.2959	-0.290054	0.290054	0.478796	-19.9767	1.91418	-1.91418	0.00481861	-19.4743	2.60719	-2.60719	6.00909e-05
CUT674	bothEndsMapped	-20.212	-3.55779	3.55779	5.228e-05	-18.5758	0.512121	-0.512121	0.246892	-18.2849	0.176701	-0.176701	0.682168	-20.4169	3.03385	-3.03385	8.95488e-05	-20.0853	3.38505	-3.38505	6.99089e-06
CUT675	mapped5	-37.9011	-24.2298	24.2298	1	-37.8477	24.3368	-24.3368	1	-37.786	24.4601	-24.4601	1	-50.0161	0	0	1	-50.0161	0	0	1
CUT676	bothEndsMapped	-36.601	-26.83	26.83	0.205111	-23.1396	0.111736	-0.111736	1	-22.6523	-0.616031	0.616031	0.668697	-36.635	26.7622	-26.7622	0.564941	-36.1918	27.6485	-27.6485	0.0720844
CUT677	mapped5	-20.8031	-2.37547	2.37547	0.0166579	-19.3387	-0.37144	0.37144	0.441017	-19.7612	0.720533	-0.720533	0.127714	-20.5781	2.71145	-2.71145	0.000780156	-20.9644	1.62698	-1.62698	0.0664192
CUT678	mapped3	-36.719	-26.5942	26.5942	0.205111	-23.7501	0.845064	-0.845064	0.477228	-23.9317	1.45542	-1.45542	0.318412	-37.1267	25.7787	-25.7787	1	-37.3509	25.3304	-25.3304	1
CUT679	mapped5	-35.1061	-29.8198	29.8198	0.000511929	-20.3693	0.507154	-0.507154	0.271686	-19.7715	-0.441098	0.441098	0.380538	-35.3482	29.3356	-29.3356	0.00174377	-34.798	30.4361	-30.4361	2.51437e-05
CUT680	mapped5	-19.7151	-3.72151	3.72151	6.62781e-06	-18.8327	2.21463	-2.21463	5.25734e-07	-18.6361	2.06779	-2.06779	1.02978e-06	-20.7603	1.51685	-1.51685	0.0688696	-20.5252	1.67519	-1.67519	0.0399268
CUT681	mapped3	-21.1576	-4.83644	4.83644	1.99588e-05	-18.9971	0.704872	-0.704872	0.101226	-18.5539	0.0653794	-0.0653794	0.8933	-21.464	4.10954	-4.10954	8.79822e-05	-20.9858	4.7541	-4.7541	8.02911e-07
CUT682	mapped3	-35.7839	-28.4643	28.4643	0.0613889	-21.6345	0.41984	-0.41984	0.74818	-21.4342	0.265153	-0.265153	0.894625	-35.9633	28.1054	-28.1054	0.0451569	-35.8042	28.4237	-28.4237	0.0655284
CUT683	mapped3	-35.8906	-28.2509	28.2509	0.0176816	-21.6826	0.0369276	-0.0369276	1	-21.5708	0.0599751	-0.0599751	1	-35.8924	28.2474	-28.2474	0.0504403	-35.8275	28.377	-28.377	0.0655284
CUT684	mapped5	-20.4268	-0.683405	0.683405	0.506704	-19.5687	-0.821913	0.821913	0.0800024	-19.7838	-0.145034	0.145034	0.780143	-19.9689	1.4849	-1.4849	0.0367189	-20.1469	0.817191	-0.817191	0.264255
CUT685	mapped3	-21.2504	-4.65081	4.65081	2.39914e-05	-18.9186	0.223262	-0.223262	0.649337	-18.6131	-0.141477	0.141477	0.736182	-21.3074	4.42276	-4.42276	3.34107e-05	-20.963	4.79972	-4.79972	4.56838e-07
CUT686	bothEndsMapped	-18.0449	-2.41796	2.41796	0.000248982	-16.9391	0.409718	-0.409718	0.285708	-16.5921	-0.0376134	0.0376134	0.928371	-18.2023	1.98906	-1.98906	0.00013877	-17.8164	2.44892	-2.44892	8.48443e-07
CUT687	mapped5	-35.4793	-29.0735	29.0735	0.00814382	-20.5523	-0.631856	0.631856	0.35977	-20.6733	-0.142298	0.142298	0.858892	-35.161	29.71	-29.71	0.00197937	-35.33	29.3721	-29.3721	0.0018774
CUT688	mapped3	-36.3673	-27.2974	27.2974	0.0851333	-22.2376	-0.786384	0.786384	0.560087	-22.1874	-0.639622	0.639622	0.583316	-35.9633	28.1054	-28.1054	0.0451569	-35.9522	28.1276	-28.1276	0.0498917
CUT689	bothEndsMapped	-20.524	-0.103683	0.103683	1	-20.3344	-0.0463534	0.0463534	1	-20.1399	-0.18883	0.18883	0.730932	-20.4475	0.142493	-0.142493	0.886643	-20.211	0.303639	-0.303639	0.73416
CUT690	mapped3	-23.3871	1.62267	-1.62267	0.371053	-23.031	-2.12287	2.12287	0.0366819	-23.8133	-0.311714	0.311714	1	-22.2807	0.476178	-0.476178	1	-23.0234	-1.32112	1.32112	0.420671
CUT691	bothEndsMapped	-34.3671	-31.2978	31.2978	2.81399e-07	-18.4256	-0.401978	0.401978	0.35631	-18.5066	0.00697117	-0.00697117	1	-34.1521	31.7278	-31.7278	1.04068e-09	-34.2741	31.4839	-31.4839	5.18741e-09
CUT692	bothEndsMapped	-33.9477	-32.1368	32.1368	7.19175e-09	-17.8495	0.145379	-0.145379	0.710748	-17.5738	-0.159327	0.159327	0.69793	-33.9997	32.0326	-32.0326	4.09523e-11	-33.7643	32.5036	-32.5036	3.27177e-13
CUT693	bothEndsMapped	-20.3454	-1.29092	1.29092	0.144234	-19.1989	-0.813695	0.813695	0.0706386	-19.244	-0.476661	0.476661	0.290483	-19.8953	2.07696	-2.07696	0.00293964	-19.9032	1.7493	-1.7493	0.00823372
CUT694	bothEndsMapped	-20.8639	-3.42376	3.42376	0.000544791	-19.2722	0.444445	-0.444445	0.331531	-19.0337	0.214157	-0.214157	0.665365	-21.0391	2.95926	-2.95926	0.00215181	-20.7666	3.19252	-3.19252	0.000210562
CUT695	bothEndsMapped	-20.4881	-4.17537	4.17537	8.75083e-06	-18.3011	-0.00677257	0.00677257	1	-18.0527	-0.256842	0.256842	0.544169	-20.44	4.15754	-4.15754	4.02313e-07	-20.1532	4.41921	-4.41921	1.31625e-08
CUT696	bothEndsMapped	-35.7595	-28.5131	28.5131	0.0675844	-21.2612	-0.252713	0.252713	0.690443	-20.8543	-0.820232	0.820232	0.141637	-35.6119	28.8083	-28.8083	0.00784961	-35.242	29.548	-29.548	0.00152926
CUT697	mapped3	-22.2885	-2.57458	2.57458	0.122217	-20.9954	0.186889	-0.186889	0.814359	-20.5366	-0.483926	0.483926	0.405108	-22.3357	2.36613	-2.36613	0.14872	-21.8435	3.03856	-3.03856	0.00844982
CUT698	bothEndsMapped	-20.4296	-4.29246	4.29246	3.94697e-06	-18.2612	0.187143	-0.187143	0.685644	-18.0435	-0.00180789	0.00180789	1	-20.4697	4.09798	-4.09798	6.01839e-07	-20.2099	4.30586	-4.30586	4.26245e-08
CUT699	bothEndsMapped	-20.3708	-4.40997	4.40997	4.30205e-06	-18.2256	0.327888	-0.327888	0.416112	-17.9472	0.017739	-0.017739	0.985352	-20.4857	4.06604	-4.06604	7.58176e-07	-20.1686	4.38835	-4.38835	2.06453e-08
CUT700	mapped5	-34.9044	-30.2233	30.2233	9.53644e-05	-19.8098	0.247457	-0.247457	0.65767	-19.837	0.548422	-0.548422	0.251303	-35.0063	30.0196	-30.0196	0.000400083	-35.072	29.888	-29.888	0.000213483
CUT701	mapped5	-19.0784	-2.65491	2.65491	0.000295633	-17.7249	0.167411	-0.167411	0.692485	-17.7376	0.439236	-0.439236	0.263564	-19.1109	2.47578	-2.47578	3.01433e-05	-19.0843	2.21711	-2.21711	0.000150694
CUT702	mapped5	-20.5967	-5.95829	5.95829	1.59179e-08	-17.9926	0.981228	-0.981228	0.0155737	-17.6937	0.629887	-0.629887	0.108396	-21.0332	4.9711	-4.9711	3.88969e-07	-20.695	5.33565	-5.33565	3.12285e-09
CUT703	mapped3	-36.8943	-26.2434	26.2434	0.572849	-23.4265	-0.486711	0.486711	1	-22.6658	-1.76133	1.76133	0.103083	-36.6305	26.7711	-26.7711	0.564941	-35.9089	28.2142	-28.2142	0.14982
CUT704	bothEndsMapped	-20.6037	-5.9442	5.9442	1.84508e-08	-17.9125	0.774241	-0.774241	0.0536351	-17.4814	0.158728	-0.158728	0.705072	-20.9413	5.15482	-5.15482	8.88906e-08	-20.4723	5.78104	-5.78104	5.75608e-11
CUT705	bothEndsMapped	-20.1768	-1.62813	1.62813	0.0572401	-19.233	-0.0423016	0.0423016	0.927026	-18.983	-0.295714	0.295714	0.482393	-20.1053	1.65688	-1.65688	0.0165489	-19.816	1.92378	-1.92378	0.00517554
CUT706	mapped5	-35.5786	-28.8749	28.8749	0.0202953	-21.1316	0.137454	-0.137454	0.710998	-20.8506	-0.177206	0.177206	0.922741	-35.6374	28.7573	-28.7573	0.0119756	-35.4044	29.2232	-29.2232	0.00356827
CUT707	mapped5	-19.9616	-4.05859	4.05859	2.65393e-06	-18.0759	0.506753	-0.506753	0.202053	-18.0967	0.794767	-0.794767	0.0438755	-20.1615	3.54453	-3.54453	4.67555e-06	-20.1432	3.26931	-3.26931	1.78212e-05
CUT708	bothEndsMapped	-34.8069	-30.4184	30.4184	5.17311e-05	-19.6657	0.319226	-0.319226	0.48522	-19.2245	-0.316258	0.316258	0.492848	-34.9521	30.128	-30.128	0.000233109	-34.5513	30.9294	-30.9294	7.51582e-07
CUT709	mapped5	-35.966	-28.1001	28.1001	0.0262834	-22.9925	2.33374	-2.33374	0.0386096	-21.7254	0.0465718	-0.0465718	1	-37.122	25.7881	-25.7881	1	-35.8951	28.2419	-28.2419	0.14982
CUT710	bothEndsMapped	-21.1912	-2.76925	2.76925	0.00849518	-19.7982	0.193419	-0.193419	0.706427	-20.1882	1.21993	-1.21993	0.0193998	-21.2414	2.55466	-2.55466	0.0140791	-21.5974	1.53088	-1.53088	0.220254
CUT711	bothEndsMapped	-21.3126	-4.52644	4.52644	4.89445e-05	-19.1475	0.39959	-0.39959	0.364563	-18.5822	-0.484462	0.484462	0.242925	-21.4647	4.10814	-4.10814	8.79822e-05	-20.862	5.00157	-5.00157	8.22604e-08
CUT712	bothEndsMapped	-21.6344	0.760954	-0.760954	0.55278	-21.8749	-0.103807	0.103807	1	-22.0805	0.554666	-0.554666	0.476311	-21.5456	-0.697642	0.697642	0.47351	-21.7092	-1.33672	1.33672	0.137884
CUT713	bothEndsMapped	-22.1974	-0.756805	0.756805	0.664928	-21.7287	0.0483723	-0.0483723	1	-21.4313	-0.300139	0.300139	0.690874	-22.1634	0.710777	-0.710777	0.779974	-21.8325	1.06066	-1.06066	0.391075
CUT714	bothEndsMapped	-34.5378	-30.9566	30.9566	2.30482e-06	-19.297	0.690151	-0.690151	0.13456	-19.2193	0.781199	-0.781199	0.0720184	-34.8617	30.3086	-30.3086	0.000103426	-34.8202	30.3917	-30.3917	5.77146e-05
CUT715	bothEndsMapped	-22.1772	-0.797123	0.797123	0.664928	-21.2784	-0.791854	0.791854	0.276347	-21.0609	-0.9801	0.9801	0.0921817	-21.7295	1.57839	-1.57839	0.194954	-21.4863	1.75298	-1.75298	0.107451
CUT716	mapped3	-34.9951	-30.0419	30.0419	0.000237726	-19.7497	-0.25903	0.25903	0.710905	-19.7767	0.0418541	-0.0418541	1	-34.8436	30.3449	-30.3449	7.47124e-05	-34.9214	30.1894	-30.1894	3.08637e-05
CUT717	mapped5	-20.7389	-1.67376	1.67376	0.070154	-19.8188	0.0165222	-0.0165222	1	-19.6072	-0.159712	0.159712	0.799793	-20.7069	1.62358	-1.62358	0.0451606	-20.4548	1.81598	-1.81598	0.0189561
CUT718	mapped3	-35.9242	-28.1837	28.1837	0.0262834	-21.4928	-0.443609	0.443609	0.652785	-21.3464	-0.490213	0.490213	0.450468	-35.6752	28.6817	-28.6817	0.0119756	-35.5677	28.8966	-28.8966	0.014625
CUT719	mapped3	-19.5272	-2.92732	2.92732	0.00021378	-18.2704	0.653096	-0.653096	0.120449	-18.0246	0.407766	-0.407766	0.326673	-19.7991	2.26927	-2.26927	0.00105991	-19.5132	2.52929	-2.52929	6.83631e-05
CUT720	bothEndsMapped	-19.7244	-3.70278	3.70278	7.74787e-06	-18.1533	0.786879	-0.786879	0.0577698	-18.1002	0.927143	-0.927143	0.0207773	-20.066	2.90549	-2.90549	7.59796e-05	-19.9727	2.78028	-2.78028	6.94507e-05
CUT721	bothEndsMapped	-20.4321	-2.28751	2.28751	0.010734	-19.0086	-0.377699	0.377699	0.425195	-18.9937	-0.160546	0.160546	0.751233	-20.202	2.63345	-2.63345	0.000596784	-20.1486	2.42833	-2.42833	0.000859508
CUT722	bothEndsMapped	-34.9937	-30.0447	30.0447	0.000298187	-20.4756	1.26305	-1.26305	0.0236291	-20.1705	0.898854	-0.898854	0.0872915	-35.5915	28.8492	-28.8492	0.00784961	-35.3291	29.3739	-29.3739	0.00270927
CUT723	bothEndsMapped	-34.6656	-30.701	30.701	9.48792e-06	-19.2766	0.145825	-0.145825	0.778393	-19.1417	0.122587	-0.122587	0.815567	-34.7126	30.6069	-30.6069	1.7331e-05	-34.6176	30.797	-30.797	2.81267e-06
CUT724	bothEndsMapped	-19.606	-2.3249	2.3249	0.00226271	-18.2644	-0.161913	0.161913	0.703456	-18.0658	-0.312578	0.312578	0.453495	-19.4791	2.46461	-2.46461	8.62469e-05	-19.242	2.62686	-2.62686	2.26518e-05
CUT725	mapped3	-34.9102	-30.2117	30.2117	9.53644e-05	-20.0971	0.769536	-0.769536	0.129527	-19.5881	-0.00156252	0.00156252	1	-35.2803	29.4716	-29.4716	0.000760861	-34.8154	30.4012	-30.4012	3.28519e-05
CUT726	mapped3	-22.5741	-2.00333	2.00333	0.180995	-22.3206	1.72511	-1.72511	0.0535518	-22.2252	1.78063	-1.78063	0.0198929	-23.3819	0.273761	-0.273761	1	-23.2461	0.233346	-0.233346	1
CUT727	bothEndsMapped	-36.7376	-26.557	26.557	0.335543	-22.6728	-1.36225	1.36225	0.159823	-22.7737	-0.913613	0.913613	0.353709	-36.0376	27.957	-27.957	0.0726459	-36.1818	27.6686	-27.6686	0.0720844
CUT728	bothEndsMapped	-34.9704	-30.0913	30.0913	0.000190969	-19.6724	-0.294905	0.294905	0.55513	-19.4378	-0.517546	0.517546	0.253835	-34.805	30.4222	-30.4222	4.84806e-05	-34.609	30.814	-30.814	1.69781e-06
CUT729	mapped5	-21.2361	-2.67943	2.67943	0.014529	-19.6285	-0.327352	0.327352	0.525559	-19.6344	-0.0689204	0.0689204	0.91761	-21.0226	2.99237	-2.99237	0.00215181	-20.9905	2.74462	-2.74462	0.00422703
CUT730	bothEndsMapped	-35.6192	-28.7937	28.7937	0.0248723	-21.4115	0.600055	-0.600055	0.39689	-21.0981	0.219638	-0.219638	0.820387	-35.8963	28.2395	-28.2395	0.0451569	-35.6231	28.7859	-28.7859	0.0214401
CUT731	bothEndsMapped	-35.927	-28.1781	28.1781	0.0262834	-21.0672	-1.34971	1.34971	0.0364273	-21.1213	-0.99452	0.99452	0.118855	-35.2388	29.5545	-29.5545	0.00061325	-35.3269	29.3783	-29.3783	0.00397137
CUT732	mapped5	-35.6016	-28.8288	28.8288	0.0282106	-21.4715	0.745929	-0.745929	0.257131	-20.9694	-0.0110775	0.0110775	1	-35.9633	28.1054	-28.1054	0.0451569	-35.5013	29.0296	-29.0296	0.0109414
CUT733	bothEndsMapped	-19.5039	-2.97386	2.97386	0.000156542	-17.589	-0.659193	0.659193	0.0933697	-17.5721	-0.446213	0.446213	0.259144	-19.1291	3.60944	-3.60944	7.34546e-09	-19.073	3.4097	-3.4097	2.37002e-08
CUT734	bothEndsMapped	-23.1646	1.17757	-1.17757	0.715347	-22.824	-1.6647	1.6647	0.159823	-22.4124	-2.24079	2.24079	0.0142468	-22.2889	0.459691	-0.459691	1	-21.8367	1.05222	-1.05222	0.391075
CUT735	bothEndsMapped	-22.9382	-1.27527	1.27527	0.575362	-21.4912	-1.4198	1.4198	0.0439437	-21.3117	-1.53182	1.53182	0.0156488	-22.1822	2.67316	-2.67316	0.0558355	-21.9681	2.78935	-2.78935	0.0265497
CUT736	bothEndsMapped	-35.027	-29.9781	29.9781	0.000376941	-20.0148	0.136261	-0.136261	0.77692	-19.608	-0.430341	0.430341	0.393343	-35.0819	29.8684	-29.8684	0.00111861	-34.7171	30.5979	-30.5979	1.15852e-05
CUT737	bothEndsMapped	-20.0057	-1.97022	1.97022	0.014205	-18.9381	0.0119591	-0.0119591	0.969359	-19.0682	0.519153	-0.519153	0.242138	-19.97	1.92764	-1.92764	0.00513506	-20.0639	1.42783	-1.42783	0.0415699
CUT738	mapped3	-35.5246	-28.983	28.983	0.0147785	-20.8347	-0.184119	0.184119	0.825453	-20.762	-0.082894	0.082894	1	-35.4086	29.2149	-29.2149	0.00233634	-35.3785	29.2751	-29.2751	0.00356827
CUT739	bothEndsMapped	-34.935	-30.1621	30.1621	0.000146332	-19.5935	-0.310503	0.310503	0.537585	-19.6549	0.058987	-0.058987	0.958475	-34.7597	30.5126	-30.5126	2.561e-05	-34.8639	30.3044	-30.3044	6.75322e-05
CUT740	mapped5	-35.6905	-28.6511	28.6511	0.0342382	-20.7692	-0.992962	0.992962	0.10116	-20.7594	-0.765622	0.765622	0.162955	-35.176	29.6802	-29.6802	0.00284521	-35.2106	29.6108	-29.6108	0.000731108
CUT741	bothEndsMapped	-34.6617	-30.7087	30.7087	7.97047e-06	-19.1376	-0.157263	0.157263	0.763161	-19.0946	0.00362708	-0.00362708	1	-34.5711	30.8898	-30.8898	1.2221e-06	-34.5678	30.8966	-30.8966	9.59589e-07
CUT742	bothEndsMapped	-17.8873	-3.20218	3.20218	2.55682e-06	-16.3867	0.415315	-0.415315	0.267732	-15.9696	-0.172434	0.172434	0.640562	-18.0445	2.77358	-2.77358	1.33373e-07	-17.5885	3.37378	-3.37378	3.77907e-11
CUT743	mapped5	-35.6195	-28.7931	28.7931	0.0248723	-21.8413	1.48575	-1.48575	0.0790568	-20.9537	-0.0435373	0.0435373	1	-36.3329	27.3662	-27.3662	0.192139	-35.4778	29.0765	-29.0765	0.0109414
CUT744	mapped3	-35.1719	-29.6882	29.6882	0.0013977	-21.6997	2.94225	-2.94225	0.000146853	-20.1612	0.112164	-0.112164	0.889656	-36.626	26.78	-26.78	0.564941	-35.1292	29.7737	-29.7737	0.00043075
CUT745	bothEndsMapped	-21.0587	-5.03421	5.03421	6.35418e-06	-18.6372	0.396749	-0.396749	0.338787	-18.32	0.00901097	-0.00901097	1	-21.2073	4.62294	-4.62294	8.33392e-06	-20.8542	5.01715	-5.01715	6.90199e-08
CUT746	bothEndsMapped	-18.9211	-1.69471	1.69471	0.0140569	-18.2658	0.598292	-0.598292	0.146796	-17.8826	0.0785789	-0.0785789	0.860396	-19.1699	1.08296	-1.08296	0.0583994	-18.7484	1.61411	-1.61411	0.00317943
CUT747	mapped3	-22.2573	-2.63711	2.63711	0.0946544	-21.1498	0.638685	-0.638685	0.385765	-20.5575	-0.299369	0.299369	0.667552	-22.5266	1.98428	-1.98428	0.283911	-21.8939	2.9379	-2.9379	0.0142984
CUT748	bothEndsMapped	-20.0913	-2.32516	2.32516	0.00380579	-18.9027	0.154499	-0.154499	0.764103	-18.6779	-0.0484255	0.0484255	0.930179	-20.1206	2.15237	-2.15237	0.00305552	-19.8573	2.36726	-2.36726	0.000462831
CUT749	mapped3	-34.986	-30.0602	30.0602	0.000190969	-20.4279	1.1466	-1.1466	0.0359241	-19.7167	-0.0290878	0.0290878	1	-35.5411	28.95	-28.95	0.00863981	-34.8673	30.2976	-30.2976	8.90459e-05
CUT750	mapped5	-21.8332	-1.48529	1.48529	0.234493	-20.9307	-0.131006	0.131006	1	-20.6083	-0.52883	0.52883	0.343117	-21.7227	1.59201	-1.59201	0.144557	-21.3703	1.98497	-1.98497	0.0521346
CUT751	bothEndsMapped	-21.4123	-1.15711	1.15711	0.312728	-20.3087	-0.858107	0.858107	0.122033	-20.595	-0.0384831	0.0384831	1	-20.9395	1.98858	-1.98858	0.0342488	-21.1919	1.17196	-1.17196	0.282999
CUT752	bothEndsMapped	-20.5836	-0.814487	0.814487	0.36342	-19.8338	-0.495139	0.495139	0.370307	-19.9705	0.0250734	-0.0250734	1	-20.2901	1.28728	-1.28728	0.0833614	-20.3918	0.772088	-0.772088	0.355161
CUT753	bothEndsMapped	-19.9291	-2.64949	2.64949	0.0014647	-18.614	0.249332	-0.249332	0.570026	-18.3286	-0.0751883	0.0751883	0.851434	-19.9986	2.39647	-2.39647	0.000611593	-19.6759	2.72987	-2.72987	5.86413e-05
CUT754	bothEndsMapped	-19.6241	-2.73348	2.73348	0.000402232	-18.2617	0.190332	-0.190332	0.631748	-18.0931	0.0998443	-0.0998443	0.809529	-19.6772	2.51315	-2.51315	0.000208143	-19.4716	2.61253	-2.61253	5.26506e-05
CUT755	bothEndsMapped	-36.0916	-27.8489	27.8489	0.0627738	-21.6117	-0.916005	0.916005	0.216311	-22.0727	0.2529	-0.2529	0.862814	-35.6192	28.7936	-28.7936	0.00784961	-36.1202	27.7917	-27.7917	0.0720844
CUT756	mapped5	-34.4902	-31.0517	31.0517	1.32756e-06	-18.7766	-0.157571	0.157571	0.72734	-18.8594	0.254379	-0.254379	0.603207	-34.3882	31.2557	-31.2557	6.36045e-08	-34.5154	31.0013	-31.0013	3.46082e-07
CUT757	mapped3	-20.7841	-1.58345	1.58345	0.0910914	-19.7772	-0.223912	0.223912	0.706427	-19.7572	-0.0172802	0.0172802	1	-20.623	1.79157	-1.79157	0.0235508	-20.5668	1.59193	-1.59193	0.0465484
CUT758	mapped3	-36.592	-26.848	26.848	0.205111	-23.6217	1.10171	-1.10171	0.74229	-23.1371	0.379411	-0.379411	0.793223	-37.1267	25.7787	-25.7787	1	-36.6859	26.6604	-26.6604	0.322673
CUT759	bothEndsMapped	-19.8409	-1.85521	1.85521	0.0196103	-18.8468	0.0841767	-0.0841767	0.884042	-18.7402	0.117623	-0.117623	0.808968	-19.8311	1.76049	-1.76049	0.0104965	-19.6885	1.73385	-1.73385	0.00679162
CUT760	bothEndsMapped	-36.9227	-26.1868	26.1868	0.572849	-24.4384	1.4569	-1.4569	0.636263	-23.3362	-0.501081	0.501081	0.77136	-37.6247	24.7828	-24.7828	1	-36.5621	26.9079	-26.9079	0.191544
CUT761	bothEndsMapped	-34.1318	-31.7685	31.7685	7.85958e-08	-18.4342	0.600914	-0.600914	0.154958	-18.0364	0.0517273	-0.0517273	0.90691	-34.4072	31.2177	-31.2177	1.0221e-07	-34.0474	31.9373	-31.9373	2.57175e-10
CUT762	mapped3	-20.5343	-4.08308	4.08308	1.25606e-05	-18.998	1.21016	-1.21016	0.00493981	-18.225	-0.0891038	0.0891038	0.84361	-21.0898	2.8579	-2.8579	0.00430644	-20.2805	4.16466	-4.16466	1.7552e-07
CUT763	bothEndsMapped	-34.9026	-30.227	30.227	9.53644e-05	-19.5285	-0.325718	0.325718	0.516143	-19.5667	-0.00251914	0.00251914	1	-34.7229	30.5862	-30.5862	1.7331e-05	-34.8019	30.4283	-30.4283	3.28519e-05
CUT764	bothEndsMapped	-20.6238	-0.289312	0.289312	0.823063	-20.2403	-0.260182	0.260182	0.687041	-20.6115	0.72869	-0.72869	0.194484	-20.4408	0.541079	-0.541079	0.580395	-20.7815	-0.452038	0.452038	0.632736
CUT765	mapped5	-21.249	-1.48379	1.48379	0.193805	-20.9236	1.09108	-1.09108	0.0822294	-20.6755	0.840846	-0.840846	0.151078	-21.7341	0.39932	-0.39932	0.805821	-21.453	0.649756	-0.649756	0.575417
CUT766	mapped3	-37.3953	-25.2415	25.2415	1	-23.5075	-2.32744	2.32744	0.136299	-24.3147	-0.466216	0.466216	1	-36.2151	27.602	-27.602	0.206438	-37.0608	25.9106	-25.9106	1
CUT767	bothEndsMapped	-19.7555	-1.30076	1.30076	0.0894408	-18.8354	-0.340931	0.340931	0.449097	-18.9259	0.086893	-0.086893	0.865024	-19.5389	1.61977	-1.61977	0.0110684	-19.5916	1.2025	-1.2025	0.0623615
CUT768	bothEndsMapped	-35.3436	-29.345	29.345	0.00514046	-20.3695	-0.368314	0.368314	0.485461	-20.4988	0.136414	-0.136414	0.868155	-35.1318	29.7685	-29.7685	0.00139891	-35.3073	29.4174	-29.4174	0.0018774
CUT769	mapped5	-35.1666	-29.6988	29.6988	0.0013977	-20.7485	1.08296	-1.08296	0.0719154	-20.6316	1.09556	-1.09556	0.0443161	-35.6826	28.667	-28.667	0.0187993	-35.605	28.8221	-28.8221	0.0214401
CUT770	bothEndsMapped	-21.3685	-2.41466	2.41466	0.0314473	-20.0418	-0.031489	0.031489	1	-20.1306	0.392828	-0.392828	0.456495	-21.3026	2.43221	-2.43221	0.0229156	-21.3601	2.00536	-2.00536	0.0403238
CUT771	mapped5	-34.4211	-31.19	31.19	5.92488e-07	-19.0721	0.707582	-0.707582	0.123207	-18.8012	0.412289	-0.412289	0.330169	-34.7562	30.5196	-30.5196	1.89422e-05	-34.5212	30.9897	-30.9897	5.64192e-07
CUT772	mapped5	-35.4284	-29.1753	29.1753	0.00932655	-21.5441	1.62236	-1.62236	0.026211	-21.0882	0.957112	-0.957112	0.130381	-36.2193	27.5935	-27.5935	0.206438	-35.8042	28.4237	-28.4237	0.0655284
CUT773	mapped3	-21.3185	-0.514554	0.514554	0.64423	-20.2363	-1.44894	1.44894	0.00623324	-20.4554	-0.76392	0.76392	0.157303	-20.5447	1.94813	-1.94813	0.0124181	-20.7316	1.26236	-1.26236	0.169233
CUT774	mapped5	-22.6364	-1.87876	1.87876	0.244476	-21.5549	-0.0726175	0.0726175	1	-21.322	-0.29193	0.29193	0.711431	-22.5456	1.94635	-1.94635	0.397582	-22.2839	2.15781	-2.15781	0.142771
CUT775	bothEndsMapped	-19.1282	-1.97644	1.97644	0.00564541	-18.2218	0.354891	-0.354891	0.391217	-17.6865	-0.468999	0.468999	0.24298	-19.2621	1.59437	-1.59437	0.00625585	-18.6871	2.43263	-2.43263	1.0485e-05
CUT776	bothEndsMapped	-34.527	-30.9782	30.9782	1.96764e-06	-19.0329	0.215209	-0.215209	0.656647	-18.9932	0.382212	-0.382212	0.377219	-34.611	30.8101	-30.8101	2.71706e-06	-34.6076	30.8169	-30.8169	2.17671e-06
CUT777	bothEndsMapped	-18.4748	-1.1548	1.1548	0.0833298	-17.7525	-0.0931797	0.0931797	0.826187	-17.2867	-0.778197	0.778197	0.0442489	-18.3823	1.22569	-1.22569	0.0163914	-17.8777	1.92319	-1.92319	8.57993e-05
CUT778	mapped5	-35.2199	-29.5924	29.5924	0.00197825	-20.3068	-0.0102442	0.0102442	1	-20.556	0.734556	-0.734556	0.170849	-35.1878	29.6564	-29.6564	0.00284521	-35.4796	29.073	-29.073	0.0109414
CUT779	bothEndsMapped	-20.1367	-2.23431	2.23431	0.00633872	-19.1293	0.430329	-0.430329	0.325668	-18.9007	0.219741	-0.219741	0.615848	-20.3008	1.79199	-1.79199	0.0181492	-20.0363	2.0091	-2.0091	0.00585216
CUT780	bothEndsMapped	-34.748	-30.5362	30.5362	1.92203e-05	-19.4043	0.0396969	-0.0396969	0.919519	-19.1599	-0.202229	0.202229	0.697346	-34.7518	30.5285	-30.5285	1.89422e-05	-34.5459	30.9403	-30.9403	7.51582e-07
CUT781	bothEndsMapped	-20.6374	-1.23286	1.23286	0.181037	-19.4715	-0.912246	0.912246	0.0511595	-19.8236	0.038865	-0.038865	0.954175	-20.1375	2.11869	-2.11869	0.00347117	-20.4501	1.18154	-1.18154	0.149221
CUT782	bothEndsMapped	-34.1598	-31.7125	31.7125	1.09078e-07	-18.2934	0.19	-0.19	0.642402	-18.2214	0.292599	-0.292599	0.485867	-34.2328	31.5666	-31.5666	5.15408e-09	-34.2023	31.6275	-31.6275	6.28249e-09
CUT783	mapped5	-20.4236	-2.30433	2.30433	0.010734	-18.9488	-0.442366	0.442366	0.335084	-18.7619	-0.569456	0.569456	0.180568	-20.1537	2.73003	-2.73003	0.000293432	-19.9295	2.86657	-2.86657	7.06132e-05
CUT784	bothEndsMapped	-20.634	-1.88354	1.88354	0.0368317	-19.614	0.0445429	-0.0445429	0.954728	-19.4493	-0.0382337	0.0382337	0.962929	-20.6106	1.81625	-1.81625	0.0235508	-20.4072	1.91124	-1.91124	0.0110579
CUT785	bothEndsMapped	-20.3741	-2.40342	2.40342	0.00838062	-18.851	-0.446462	0.446462	0.309759	-18.998	0.0942327	-0.0942327	0.831916	-20.1078	2.82187	-2.82187	0.000147643	-20.2137	2.29824	-2.29824	0.00236735
CUT786	bothEndsMapped	-35.1445	-29.7431	29.7431	0.00107286	-20.2769	0.22326	-0.22326	0.680612	-19.9805	-0.123046	0.123046	0.849843	-35.2324	29.5674	-29.5674	0.00372308	-34.9757	30.0807	-30.0807	6.69963e-05
CUT787	mapped3	-36.1813	-27.6695	27.6695	0.0851333	-22.9012	1.33257	-1.33257	0.311986	-22.4978	0.772291	-0.772291	0.389991	-36.827	26.3781	-26.3781	0.564941	-36.4583	27.1155	-27.1155	0.191544
CUT788	bothEndsMapped	-36.0228	-27.9865	27.9865	0.0401085	-21.5133	-0.848856	0.848856	0.312188	-21.5216	-0.585079	0.585079	0.416271	-35.5843	28.8634	-28.8634	0.00784961	-35.6314	28.7693	-28.7693	0.0319564
CUT789	bothEndsMapped	-35.5387	-28.9548	28.9548	0.0202953	-22.0596	2.19753	-2.19753	0.0108153	-21.1962	0.717653	-0.717653	0.29671	-36.6215	26.789	-26.789	0.323241	-35.7997	28.4327	-28.4327	0.0655284
CUT790	mapped5	-20.5096	-2.13247	2.13247	0.0151436	-19.435	0.222588	-0.222588	0.682009	-19.3226	0.244048	-0.244048	0.604243	-20.5676	1.90229	-1.90229	0.0157638	-20.4115	1.9026	-1.9026	0.0134953
CUT791	mapped5	-34.7746	-30.483	30.483	3.42642e-05	-19.3587	-0.11413	0.11413	0.80425	-19.6777	0.770191	-0.770191	0.0940152	-34.6902	30.6516	-30.6516	9.34448e-06	-35.0492	29.9336	-29.9336	0.000153482
CUT792	bothEndsMapped	-18.0033	-2.80519	2.80519	3.22576e-05	-16.7169	0.444289	-0.444289	0.238344	-16.1788	-0.385378	0.385378	0.304057	-18.1753	2.34699	-2.34699	7.11538e-06	-17.5988	3.18813	-3.18813	3.31915e-10
CUT793	mapped5	-19.4767	-1.85828	1.85828	0.0103788	-18.3197	-0.271245	0.271245	0.530185	-18.2169	-0.230181	0.230181	0.587444	-19.2998	2.09808	-2.09808	0.000584466	-19.1568	2.07224	-2.07224	0.000453414
CUT794	mapped5	-35.9874	-28.0573	28.0573	0.0401085	-21.9191	0.123073	-0.123073	1	-21.5945	-0.27924	0.27924	0.778716	-36.0334	27.9652	-27.9652	0.0726459	-35.7515	28.529	-28.529	0.0442305
CUT795	mapped5	-21.091	-2.96954	2.96954	0.00430445	-19.5365	0.0883625	-0.0883625	0.912766	-19.4203	0.102332	-0.102332	0.818318	-21.0802	2.87703	-2.87703	0.00328514	-20.9234	2.87887	-2.87887	0.00167015
CUT796	mapped3	-36.7959	26.4402	-26.4402	0.333333	-36.8046	-26.423	26.423	0.261521	-50.0161	0	0	1	-23.5875	-0.137548	0.137548	1	-36.6894	-26.6532	26.6532	0.333333
CUT797	mapped5	-21.4095	-1.16279	1.16279	0.374856	-21.7836	2.14093	-2.14093	0.00423573	-20.6724	0.164819	-0.164819	0.855492	-22.4258	-0.984082	0.984082	0.477826	-21.2778	1.0002	-1.0002	0.309018
CUT798	bothEndsMapped	-34.4216	-31.1889	31.1889	5.92488e-07	-18.9321	0.429295	-0.429295	0.323042	-19.0018	0.815253	-0.815253	0.0654056	-34.6111	30.8099	-30.8099	3.61546e-06	-34.7256	30.5809	-30.5809	9.80386e-06
CUT799	bothEndsMapped	-35.0115	-30.0091	30.0091	0.000298187	-19.9689	0.105604	-0.105604	0.780859	-19.7008	-0.183512	0.183512	0.749771	-35.0462	29.9397	-29.9397	0.000782432	-34.8237	30.3846	-30.3846	4.33336e-05
CUT800	bothEndsMapped	-35.8906	-28.2509	28.2509	0.0176816	-21.749	0.169568	-0.169568	0.869427	-21.7227	0.363829	-0.363829	0.653208	-35.9593	28.1135	-28.1135	0.0451569	-35.9662	28.0997	-28.0997	0.0498917
CUT801	mapped5	-20.7462	-2.48938	2.48938	0.00979951	-19.2135	-0.384191	0.384191	0.419314	-19.1931	-0.178302	0.178302	0.691533	-20.511	2.84564	-2.84564	0.000341614	-20.4557	2.64432	-2.64432	0.000797067
CUT802	bothEndsMapped	-35.8566	-28.319	28.319	0.0176816	-21.4642	-0.254126	0.254126	0.769275	-20.8733	-1.18921	1.18921	0.0430223	-35.7121	28.6079	-28.6079	0.0187993	-35.1606	29.711	-29.711	0.000371008
CUT803	bothEndsMapped	-35.6362	-28.7598	28.7598	0.0248723	-20.9495	-0.404431	0.404431	0.494154	-20.9054	-0.245848	0.245848	0.758688	-35.4173	29.1975	-29.1975	0.00273307	-35.4081	29.2159	-29.2159	0.00509791
CUT804	bothEndsMapped	-21.9956	-3.1604	3.1604	0.0205151	-20.2207	-0.169246	0.169246	0.749854	-20.3184	0.272513	-0.272513	0.653284	-21.8628	3.31189	-3.31189	0.00450758	-21.9232	2.8793	-2.8793	0.0142984
CUT805	bothEndsMapped	-34.8427	-30.3468	30.3468	6.18285e-05	-19.5979	0.042727	-0.042727	0.955378	-19.5946	0.282967	-0.282967	0.581406	-34.8497	30.3326	-30.3326	7.47124e-05	-34.888	30.2561	-30.2561	8.90459e-05
CUT806	bothEndsMapped	-20.0325	-2.44286	2.44286	0.00410696	-18.8702	0.339744	-0.339744	0.46493	-18.5097	-0.134727	0.134727	0.753112	-20.1519	2.08976	-2.08976	0.00347117	-19.7513	2.57912	-2.57912	0.00011346
CUT807	mapped3	-34.7296	-30.573	30.573	1.60165e-05	-19.2123	-0.24593	0.24593	0.586563	-18.8941	-0.635731	0.635731	0.139031	-34.5833	30.8654	-30.8654	1.58008e-06	-34.3065	31.4191	-31.4191	9.38254e-09
CUT808	bothEndsMapped	-34.8011	-30.4298	30.4298	4.1989e-05	-19.5723	0.151367	-0.151367	0.738773	-19.0744	-0.597336	0.597336	0.177446	-34.8597	30.3126	-30.3126	0.000103426	-34.408	31.2161	-31.2161	6.53243e-08
CUT809	bothEndsMapped	-35.7042	-28.6236	28.6236	0.0342382	-21.6475	0.688252	-0.688252	0.355711	-21.5745	0.789484	-0.789484	0.211393	-36.0376	27.957	-27.957	0.0726459	-36.0038	28.0246	-28.0246	0.0498917
CUT810	mapped3	-35.3485	-29.3352	29.3352	0.00514046	-20.9894	0.838799	-0.838799	0.214677	-20.8131	0.732572	-0.732572	0.203926	-35.7521	28.5279	-28.5279	0.0187993	-35.605	28.8221	-28.8221	0.0214401
CUT811	bothEndsMapped	-20.8354	-5.48089	5.48089	3.95489e-07	-17.8128	-0.37898	0.37898	0.353772	-18.0738	0.389727	-0.389727	0.343058	-20.6023	5.83284	-5.83284	8.5173e-11	-20.8276	5.07034	-5.07034	4.07193e-08
CUT812	bothEndsMapped	-35.3254	-29.3814	29.3814	0.00388256	-20.8534	0.656724	-0.656724	0.281806	-20.5042	0.204903	-0.204903	0.805425	-35.6302	28.7718	-28.7718	0.00784961	-35.3277	29.3767	-29.3767	0.00270927
CUT813	bothEndsMapped	-35.0124	-30.0073	30.0073	0.000298187	-20.0117	0.208625	-0.208625	0.725591	-19.8349	0.101764	-0.101764	0.863113	-35.0993	29.8335	-29.8335	0.00162226	-34.9614	30.1093	-30.1093	4.88247e-05
CUT814	mapped5	-20.6783	-1.1512	1.1512	0.271032	-20.4912	0.983983	-0.983983	0.0775669	-19.7819	-0.187939	0.187939	0.735786	-21.1244	0.144902	-0.144902	1	-20.3721	1.3376	-1.3376	0.111672
CUT815	bothEndsMapped	-19.6072	-1.9373	1.9373	0.012958	-18.7214	0.385723	-0.385723	0.384046	-18.5311	0.251559	-0.251559	0.558561	-19.7482	1.54115	-1.54115	0.0174697	-19.5186	1.68847	-1.68847	0.00686159
CUT816	bothEndsMapped	-21.0769	-2.99785	2.99785	0.00363873	-19.5803	0.229386	-0.229386	0.656464	-19.4475	0.210144	-0.210144	0.675502	-21.1404	2.75665	-2.75665	0.00514874	-20.9684	2.7889	-2.7889	0.00263036
CUT817	bothEndsMapped	-20.6361	-3.87944	3.87944	4.85312e-05	-18.8296	0.479068	-0.479068	0.284982	-18.2448	-0.443942	0.443942	0.269491	-20.8282	3.38108	-3.38108	0.000146822	-20.2035	4.31858	-4.31858	3.15727e-08
CUT818	bothEndsMapped	-35.1828	-29.6665	29.6665	0.00118389	-20.0161	-0.473169	0.473169	0.393991	-20.1509	0.043265	-0.043265	0.945194	-34.9274	30.1773	-30.1773	0.000168248	-35.1077	29.8168	-29.8168	0.000301144
CUT819	bothEndsMapped	-34.4108	-31.2105	31.2105	4.45726e-07	-18.7405	0.0722095	-0.0722095	0.864611	-18.5047	-0.152874	0.152874	0.753112	-34.4278	31.1766	-31.1766	1.69247e-07	-34.2298	31.5725	-31.5725	1.09382e-08
CUT820	bothEndsMapped	-21.4594	-4.2329	4.2329	0.000201128	-19.4176	0.359787	-0.359787	0.444538	-19.0902	-0.048414	0.048414	0.940394	-21.5874	3.86268	-3.86268	0.000375614	-21.2252	4.27524	-4.27524	1.24468e-05
CUT821	mapped3	-35.9945	-28.0431	28.0431	0.0401085	-22.232	0.727814	-0.727814	0.421635	-22.7011	1.91262	-1.91262	0.0559653	-36.3372	27.3576	-27.3576	0.192139	-36.85	26.3321	-26.3321	0.564576
CUT822	bothEndsMapped	-35.5352	-28.9617	28.9617	0.0202953	-21.0069	0.127335	-0.127335	1	-21.0506	0.461273	-0.461273	0.508127	-35.5772	28.8778	-28.8778	0.00863981	-35.6591	28.7139	-28.7139	0.0319564
CUT823	mapped3	-22.657	-1.83768	1.83768	0.244476	-21.2416	-0.804503	0.804503	0.246512	-21.6752	0.309812	-0.309812	0.769574	-22.2125	2.61253	-2.61253	0.079176	-22.6115	1.50265	-1.50265	0.282362
CUT824	bothEndsMapped	-35.0194	-29.9934	29.9934	0.000298187	-19.8155	-0.206457	0.206457	0.701808	-19.8524	0.114049	-0.114049	0.86107	-34.894	30.2442	-30.2442	0.000123086	-34.9734	30.0852	-30.0852	6.69963e-05
CUT825	bothEndsMapped	-35.2147	-29.6026	29.6026	0.00152273	-20.492	0.362506	-0.362506	0.527346	-20.4736	0.572386	-0.572386	0.338093	-35.3745	29.2831	-29.2831	0.00273307	-35.4084	29.2153	-29.2153	0.00356827
CUT826	mapped5	-35.8368	-28.3585	28.3585	0.012201	-20.8768	-1.36919	1.36919	0.0335	-21.196	-0.483985	0.483985	0.480895	-35.1307	29.7706	-29.7706	0.00139891	-35.4973	29.0375	-29.0375	0.0109414
CUT827	bothEndsMapped	-34.6452	-30.7418	30.7418	8.3791e-06	-19.1442	-0.0774952	0.0774952	0.931038	-18.966	-0.18699	0.18699	0.703414	-34.5929	30.8462	-30.8462	2.06204e-06	-34.4564	31.1194	-31.1194	1.31317e-07
CUT828	mapped3	-21.6417	0.775674	-0.775674	0.55278	-21.5875	-0.700397	0.700397	0.539234	-21.2218	-1.18472	1.18472	0.073567	-21.2422	-0.0906929	0.0906929	0.829747	-20.8537	0.374419	-0.374419	0.769002
CUT829	mapped3	-23.1854	3.21917	-3.21917	0.0120501	-24.4355	-0.49976	0.49976	1	-24.1098	-0.904709	0.904709	0.701377	-22.8827	-2.72794	2.72794	0.022057	-22.5234	-2.32112	2.32112	0.0848393
CUT830	bothEndsMapped	-21.7659	-3.60415	3.60415	0.00399845	-19.9399	0.19596	-0.19596	0.730324	-19.653	-0.131554	0.131554	0.753038	-21.8035	3.41484	-3.41484	0.00356902	-21.4861	3.73779	-3.73779	0.000456355
CUT831	bothEndsMapped	-35.0115	-30.0091	30.0091	0.000298187	-19.8729	-0.0863992	0.0863992	1	-19.654	-0.277245	0.277245	0.571444	-34.9512	30.1297	-30.1297	0.000327438	-34.7809	30.4703	-30.4703	2.19579e-05
CUT832	bothEndsMapped	-34.6614	-30.7094	30.7094	7.97047e-06	-19.2859	0.194187	-0.194187	0.704045	-19.207	0.282639	-0.282639	0.545281	-34.7288	30.5745	-30.5745	1.41722e-05	-34.6922	30.6476	-30.6476	8.76602e-06
CUT833	bothEndsMapped	-20.3005	-3.38076	3.38076	0.000151501	-18.5598	0.0806051	-0.0806051	0.831316	-18.2886	-0.214942	0.214942	0.616601	-20.297	3.27349	-3.27349	3.8887e-05	-19.9902	3.57529	-3.57529	1.09705e-06
CUT834	bothEndsMapped	-35.1079	-29.8163	29.8163	0.00064935	-19.6851	-0.854539	0.854539	0.0908464	-19.987	-0.00377042	0.00377042	1	-34.6651	30.7018	-30.7018	6.97276e-06	-35.0159	30.0002	-30.0002	9.31349e-05
CUT835	bothEndsMapped	-34.4526	-31.127	31.127	9.27681e-07	-18.6655	-0.24138	0.24138	0.58108	-18.6907	0.0557503	-0.0557503	0.906651	-34.3124	31.4073	-31.4073	2.46461e-08	-34.3766	31.2788	-31.2788	4.23138e-08
CUT836	bothEndsMapped	-20.7635	-5.62452	5.62452	1.55453e-07	-18.318	0.947979	-0.947979	0.0238149	-17.9407	0.439914	-0.439914	0.27611	-21.1886	4.6602	-4.6602	5.19336e-06	-20.7731	5.17943	-5.17943	1.50681e-08
CUT837	bothEndsMapped	-34.8258	-30.3804	30.3804	5.04274e-05	-19.9394	0.83211	-0.83211	0.0922866	-19.4358	0.0713411	-0.0713411	0.889098	-35.2142	29.6037	-29.6037	0.00415315	-34.75	30.5321	-30.5321	2.19579e-05
CUT838	mapped5	-36.8943	-26.2434	26.2434	0.572849	-23.9278	0.515785	-0.515785	0.701273	-23.4444	-0.204162	0.204162	1	-37.1314	25.7694	-25.7694	1	-36.6914	26.6494	-26.6494	0.322673
CUT839	bothEndsMapped	-19.8664	-3.41887	3.41887	4.23806e-05	-18.3633	0.632784	-0.632784	0.129217	-18.0981	0.349028	-0.349028	0.385224	-20.1306	2.77635	-2.77635	0.000196095	-19.8269	3.07185	-3.07185	1.25762e-05
CUT840	mapped3	-19.8565	-3.4386	3.4386	3.55008e-05	-18.2529	0.453933	-0.453933	0.282371	-18.4019	0.998392	-0.998392	0.015096	-20.0317	2.97416	-2.97416	4.85056e-05	-20.143	2.43971	-2.43971	0.000931803
CUT841	bothEndsMapped	-18.0378	-5.90618	5.90618	1.98692e-13	-15.1651	0.372238	-0.372238	0.311226	-15.0465	0.381618	-0.381618	0.300668	-18.1744	5.51883	-5.51883	7.32969e-19	-18.0167	5.52237	-5.52237	4.64969e-20
CUT842	mapped3	-35.2476	-29.5369	29.5369	0.00259632	-20.5565	0.372223	-0.372223	0.506555	-20.2828	0.0713782	-0.0713782	0.940951	-35.4086	29.2149	-29.2149	0.00233634	-35.1802	29.6718	-29.6718	0.000516931
CUT843	bothEndsMapped	-35.3302	-29.3717	29.3717	0.00388256	-20.2891	-0.521719	0.521719	0.363739	-20.2325	-0.387921	0.387921	0.520287	-35.0489	29.9343	-29.9343	0.000782432	-35.0346	29.9628	-29.9628	0.000111878
CUT844	bothEndsMapped	-34.7218	-30.5885	30.5885	1.60165e-05	-19.8592	1.07364	-1.07364	0.0230991	-19.3119	0.225721	-0.225721	0.636625	-35.2354	29.5613	-29.5613	0.000519935	-34.7314	30.5693	-30.5693	1.27126e-05
CUT845	mapped3	-22.6894	0.227187	-0.227187	1	-22.0655	-1.25267	1.25267	0.0937425	-22.0677	-1.00176	1.00176	0.172938	-22.0151	1.00732	-1.00732	0.45804	-21.9776	0.770474	-0.770474	0.644058
CUT846	mapped5	-36.8943	-26.2434	26.2434	0.572849	-23.9212	0.502723	-0.502723	0.701273	-23.8302	0.567417	-0.567417	0.701377	-37.1267	25.7787	-25.7787	1	-37.0721	25.888	-25.888	1
CUT847	mapped3	-37.0973	-25.8374	25.8374	0.572849	-24.1321	0.107048	-0.107048	1	-24.8121	1.71399	-1.71399	0.636351	-37.1314	25.7694	-25.7694	1	-37.8543	24.3236	-24.3236	1
CUT848	bothEndsMapped	-20.8653	-5.42097	5.42097	5.9373e-07	-18.0176	-0.0834656	0.0834656	0.862223	-18.2142	0.556398	-0.556398	0.17593	-20.778	5.48153	-5.48153	3.87673e-09	-20.9394	4.84677	-4.84677	3.64655e-07
CUT849	mapped5	-35.9821	-28.068	28.068	0.0401085	-21.9961	0.343299	-0.343299	0.855027	-22.6794	1.95604	-1.95604	0.0559653	-36.1248	27.7824	-27.7824	0.120799	-36.85	26.3321	-26.3321	0.564576
CUT850	mapped3	-36.3034	-27.4253	27.4253	0.135458	-22	-0.982431	0.982431	0.358312	-22.2768	-0.182033	0.182033	1	-35.7905	28.4512	-28.4512	0.0303834	-36.1152	27.8016	-27.8016	0.0447101
CUT851	mapped5	-36.9133	-26.2055	26.2055	0.572849	-23.6449	-0.103592	0.103592	1	-23.8356	0.524362	-0.524362	1	-36.8362	26.3598	-26.3598	0.564941	-37.0664	25.8992	-25.8992	1
CUT852	mapped3	-23.1752	3.19872	-3.19872	0.031105	-23.519	-2.3044	2.3044	0.136299	-23.4392	-2.21718	2.21718	0.124764	-21.9749	-0.912336	0.912336	0.390553	-21.8602	-0.994737	0.994737	0.296416
CUT853	mapped3	-19.4888	-3.53021	3.53021	1.04996e-05	-17.7171	0.17295	-0.17295	0.655261	-17.428	-0.158377	0.158377	0.695882	-19.531	3.33162	-3.33162	7.00757e-07	-19.2049	3.67188	-3.67188	5.44687e-09
CUT854	mapped3	-22.2991	-2.55335	2.55335	0.122217	-20.7959	-0.245193	0.245193	0.830483	-20.5214	-0.547487	0.547487	0.317098	-22.1258	2.78579	-2.78579	0.0397389	-21.8181	3.08949	-3.08949	0.00624828
CUT855	mapped5	-20.5019	-4.14778	4.14778	8.38316e-06	-18.7059	0.739888	-0.739888	0.0774907	-18.8	1.17493	-1.17493	0.00616687	-20.8287	3.38004	-3.38004	0.000188269	-20.8881	2.9494	-2.9494	0.000916817
CUT856	mappedNone	-23.4067	1.66173	-1.66173	0.371053	-23.2547	-1.7303	1.7303	0.136299	-22.9259	-2.1416	2.1416	0.0261318	-22.4833	0.0707851	-0.0707851	1	-22.1209	0.483769	-0.483769	1
CUT857	mapped5	-36.8943	-26.2434	26.2434	0.572849	-23.9212	0.502723	-0.502723	0.701273	-22.5857	-1.92147	1.92147	0.0537845	-37.1267	25.7787	-25.7787	1	-35.8265	28.3791	-28.3791	0.0985698
CUT858	bothEndsMapped	-34.9893	-30.0534	30.0534	0.000237726	-20.0628	0.405308	-0.405308	0.469641	-19.9319	0.390235	-0.390235	0.42579	-35.173	29.6861	-29.6861	0.00197937	-35.0765	29.8792	-29.8792	0.000301144
CUT859	bothEndsMapped	-20.0447	-3.8923	3.8923	7.16117e-06	-18.0718	0.146464	-0.146464	0.719603	-17.8655	-0.0194658	0.0194658	0.972313	-20.0713	3.72505	-3.72505	9.88319e-07	-19.8272	3.90132	-3.90132	4.9066e-08
CUT860	bothEndsMapped	-35.608	-28.8162	28.8162	0.0248723	-21.0915	-0.00527956	0.00527956	1	-20.9084	-0.12481	0.12481	0.918471	-35.5843	28.8634	-28.8634	0.00784961	-35.4433	29.1454	-29.1454	0.00740752
CUT861	bothEndsMapped	-21.7375	-3.67662	3.67662	0.00263306	-20.2433	0.915421	-0.915421	0.088357	-19.6182	-0.0885013	0.0885013	0.87749	-22.1434	2.75076	-2.75076	0.0397389	-21.4765	3.77253	-3.77253	0.000456355
CUT862	bothEndsMapped	-20.6773	-2.62701	2.62701	0.005903	-19.4345	0.380937	-0.380937	0.411548	-19.2539	0.26595	-0.26595	0.619622	-20.811	2.24546	-2.24546	0.00806158	-20.5943	2.36702	-2.36702	0.0047832
CUT863	mapped3	-35.7377	-28.5567	28.5567	0.0477971	-21.2396	-0.264988	0.264988	0.89447	-21.3722	0.247479	-0.247479	0.801915	-35.5915	28.8492	-28.8492	0.00784961	-35.777	28.4782	-28.4782	0.0483076
CUT864	mapped5	-35.2004	-29.6314	29.6314	0.00152273	-20.9373	1.32656	-1.32656	0.0230995	-20.3765	0.451499	-0.451499	0.434927	-35.8391	28.3539	-28.3539	0.0504403	-35.3219	29.3884	-29.3884	0.00270927
CUT865	mapped3	-23.7026	0.25349	-0.25349	0.679723	-36.863	26.3061	-26.3061	0.261521	-23.0455	-1.08252	1.08252	0.31232	-36.7674	-26.4973	26.4973	0.333333	-22.9442	0.837273	-0.837273	0.742558
CUT866	mapped3	-19.6906	-0.369448	0.369448	0.692784	-19.2032	-0.36182	0.36182	0.391079	-19.1085	-0.305036	0.305036	0.470193	-19.4548	0.727026	-0.727026	0.252678	-19.3208	0.683096	-0.683096	0.248893
CUT867	bothEndsMapped	-34.9026	-30.227	30.227	9.53644e-05	-19.8905	0.398394	-0.398394	0.42744	-19.5782	0.0204802	-0.0204802	0.960076	-35.0847	29.8627	-29.8627	0.00111861	-34.812	30.408	-30.408	4.33336e-05
CUT868	bothEndsMapped	-34.5568	-30.9185	30.9185	2.7095e-06	-19.1984	0.379473	-0.379473	0.374688	-19.3625	0.954533	-0.954533	0.0414365	-34.731	30.5701	-30.5701	1.41722e-05	-34.945	30.142	-30.142	4.29071e-05
CUT869	bothEndsMapped	-34.7895	-30.4531	30.4531	4.1989e-05	-19.5119	0.0834309	-0.0834309	0.872139	-19.5982	0.502919	-0.502919	0.297139	-34.8152	30.4017	-30.4017	4.04887e-05	-34.9475	30.137	-30.137	4.29071e-05
CUT870	mapped5	-35.4075	-29.2171	29.2171	0.00932655	-20.8896	0.398545	-0.398545	0.575102	-20.6317	0.129273	-0.129273	0.858892	-35.5843	28.8634	-28.8634	0.00784961	-35.3644	29.3034	-29.3034	0.00356827
CUT871	mapped5	-34.9187	-30.1946	30.1946	0.000117732	-19.2895	-0.900129	0.900129	0.0581957	-19.5416	-0.148768	0.148768	0.809508	-34.4568	31.1186	-31.1186	2.86226e-07	-34.7559	30.5204	-30.5204	1.66321e-05
CUT872	mapped3	-22.6062	1.23075	-1.23075	0.208484	-22.8408	-0.536749	0.536749	0.79309	-22.4453	-1.0813	1.0813	0.225643	-22.2875	-0.707364	0.707364	0.514242	-21.8471	-0.138539	0.138539	1
CUT873	bothEndsMapped	-20.5797	-1.9923	1.9923	0.0252072	-19.3085	-0.323463	0.323463	0.500452	-19.0618	-0.57036	0.57036	0.187557	-20.3624	2.31259	-2.31259	0.00342599	-20.0795	2.56657	-2.56657	0.000347744
CUT874	bothEndsMapped	-34.663	-30.7062	30.7062	7.97047e-06	-19.0108	-0.382315	0.382315	0.399893	-19.2533	0.349131	-0.349131	0.433626	-34.4479	31.1363	-31.1363	2.22826e-07	-34.7297	30.5728	-30.5728	1.27126e-05
CUT875	bothEndsMapped	-21.7624	-1.62688	1.62688	0.149676	-20.2579	-1.16116	1.16116	0.021848	-20.2759	-0.878696	0.878696	0.0705447	-21.1328	2.77179	-2.77179	0.00568192	-21.1117	2.50226	-2.50226	0.0149467
CUT876	mapped3	-35.9945	-28.0431	28.0431	0.0401085	-21.795	-0.146185	0.146185	1	-21.6399	-0.209678	0.209678	1	-35.9003	28.2316	-28.2316	0.0451569	-35.7825	28.4671	-28.4671	0.0655284
CUT877	bothEndsMapped	-35.3344	-29.3632	29.3632	0.00388256	-20.2365	-0.6058	0.6058	0.261991	-20.5201	0.207905	-0.207905	0.734141	-35.0063	30.0196	-30.0196	0.000400083	-35.3269	29.3783	-29.3783	0.00397137
CUT878	mapped5	-37.1171	-25.7979	25.7979	1	-24.1394	0.0663531	-0.0663531	1	-23.2436	-1.47872	1.47872	0.182474	-37.1267	25.7787	-25.7787	1	-36.2708	27.4905	-27.4905	0.120129
CUT879	mapped5	-33.8596	-32.3129	32.3129	1.90348e-09	-18.1844	1.14639	-1.14639	0.00475523	-17.5016	0.0275565	-0.0275565	0.95631	-34.4175	31.1971	-31.1971	1.69247e-07	-33.7766	32.4789	-32.4789	4.2405e-13
CUT880	bothEndsMapped	-20.7592	-3.63331	3.63331	0.000171918	-18.8506	0.0348462	-0.0348462	0.970781	-18.6563	-0.10723	0.10723	0.817214	-20.7236	3.5903	-3.5903	3.24448e-05	-20.4915	3.74262	-3.74262	9.34298e-06
CUT881	bothEndsMapped	-34.8756	-30.2808	30.2808	9.46431e-05	-19.7839	0.305894	-0.305894	0.529714	-19.3434	-0.328495	0.328495	0.459794	-35.0046	30.0229	-30.0229	0.000400083	-34.6083	30.8155	-30.8155	1.69781e-06
CUT882	bothEndsMapped	-34.7479	-30.5364	30.5364	2.31833e-05	-19.7223	0.707462	-0.707462	0.15377	-18.9913	-0.50823	0.50823	0.246907	-35.079	29.874	-29.874	0.00111861	-34.3852	31.2616	-31.2616	4.1983e-08
CUT883	mapped3	-23.019	-1.11365	1.11365	0.563383	-23.7683	2.82405	-2.82405	0.0317578	-22.4718	0.477847	-0.477847	0.668697	-24.3808	-1.72409	1.72409	0.552398	-23.0425	0.640706	-0.640706	1
CUT884	bothEndsMapped	-20.0452	-1.89121	1.89121	0.0209812	-19.3057	0.627117	-0.627117	0.1732	-19.1881	0.638428	-0.638428	0.158357	-20.3086	1.25035	-1.25035	0.100973	-20.1558	1.24406	-1.24406	0.105225
CUT885	bothEndsMapped	-20.259	-1.01895	1.01895	0.219694	-19.5861	-0.128992	0.128992	0.866678	-19.4098	-0.234788	0.234788	0.621204	-20.1471	1.12848	-1.12848	0.116415	-19.9377	1.23544	-1.23544	0.074398
CUT886	mapped5	-20.4532	-0.245312	0.245312	0.83822	-20.3273	0.206433	-0.206433	0.739261	-20.6693	1.13711	-1.13711	0.0443161	-20.5057	0.0261697	-0.0261697	1	-20.8155	-0.905386	0.905386	0.192462
CUT887	mapped5	-36.3278	-27.3765	27.3765	0.135458	-23.0535	1.05365	-1.05365	0.580596	-22.5501	0.293259	-0.293259	0.824605	-36.8316	26.3689	-26.3689	0.564941	-36.364	27.3042	-27.3042	0.205719
CUT888	bothEndsMapped	-35.2454	-29.5413	29.5413	0.00197825	-20.3578	-0.0637768	0.0637768	1	-20.1961	-0.139996	0.139996	0.781358	-35.2022	29.6277	-29.6277	0.00284521	-35.0904	29.8513	-29.8513	0.000153482
CUT889	mapped5	-36.7649	-26.5023	26.5023	0.335543	-24.2865	1.78754	-1.78754	0.393772	-24.4694	2.39946	-2.39946	0.240188	-37.6294	24.7732	-24.7732	1	-37.8543	24.3236	-24.3236	1
CUT890	bothEndsMapped	-21.4641	-4.22333	4.22333	0.000201128	-19.626	0.755227	-0.755227	0.132713	-19.4399	0.629671	-0.629671	0.172398	-21.7967	3.44411	-3.44411	0.0025832	-21.5696	3.58649	-3.58649	0.00151197
CUT891	bothEndsMapped	-35.1869	-29.6583	29.6583	0.00118389	-19.9338	-0.651025	0.651025	0.224159	-19.8364	-0.599046	0.599046	0.231571	-34.8428	30.3465	-30.3465	7.47124e-05	-34.7892	30.4536	-30.4536	2.51437e-05
CUT892	mapped5	-22.5915	0.0313043	-0.0313043	0.784266	-21.9013	-1.20363	1.20363	0.113588	-22.2961	-0.167305	0.167305	0.846466	-21.9376	1.16231	-1.16231	0.45804	-22.2985	0.128612	-0.128612	1
CUT893	mapped5	-22.0613	-3.02896	3.02896	0.033078	-20.6191	0.375066	-0.375066	0.554063	-20.3258	0.0347412	-0.0347412	1	-22.1922	2.65299	-2.65299	0.079176	-21.8669	2.99184	-2.99184	0.0115235
CUT894	mapped3	-20.1488	-0.853959	0.853959	0.312761	-20.3506	1.42143	-1.42143	0.0100942	-19.6174	0.202088	-0.202088	0.686709	-20.8249	-0.612325	0.612325	0.379427	-20.0583	0.608927	-0.608927	0.379416
CUT895	bothEndsMapped	-21.3176	-1.3465	1.3465	0.223613	-20.3963	-0.307329	0.307329	0.666907	-20.0744	-0.704211	0.704211	0.158054	-21.1183	1.63105	-1.63105	0.109621	-20.766	2.02374	-2.02374	0.0128604
CUT896	bothEndsMapped	-23.1742	1.19682	-1.19682	0.432676	-22.9244	-1.49098	1.49098	0.182195	-23.3236	-0.445809	0.445809	0.77136	-22.3803	0.276792	-0.276792	1	-22.7408	-0.75602	0.75602	0.704837
CUT897	bothEndsMapped	-19.6209	-0.990917	0.990917	0.188841	-18.9297	-0.195672	0.195672	0.675398	-18.6756	-0.457203	0.457203	0.273546	-19.4796	1.15938	-1.15938	0.0607888	-19.1859	1.43497	-1.43497	0.0143604
CUT898	mapped3	-35.6192	-28.7937	28.7937	0.0248723	-20.8761	-0.470867	0.470867	0.431886	-21.3305	0.684534	-0.684534	0.313178	-35.3614	29.3093	-29.3093	0.00174377	-35.8551	28.322	-28.322	0.0985698
CUT899	bothEndsMapped	-21.156	-2.83958	2.83958	0.0065277	-19.6862	0.100901	-0.100901	0.858611	-19.3721	-0.280583	0.280583	0.563551	-21.1581	2.72135	-2.72135	0.00672229	-20.8063	3.11312	-3.11312	0.000455123
CUT900	bothEndsMapped	-35.3736	-29.2848	29.2848	0.00514046	-20.7555	0.236758	-0.236758	0.677189	-20.4738	-0.0796412	0.0796412	1	-35.4748	29.0825	-29.0825	0.0035211	-35.2345	29.5631	-29.5631	0.00152926
CUT901	mapped3	-35.5643	-28.9035	28.9035	0.0202953	-20.8489	-0.329005	0.329005	0.586572	-21.1178	0.455756	-0.455756	0.418038	-35.3853	29.2614	-29.2614	0.00273307	-35.6843	28.6636	-28.6636	0.0483076
CUT902	mapped5	-34.6193	-30.7934	30.7934	5.87216e-06	-19.3096	0.386476	-0.386476	0.421387	-18.9864	-0.0133441	0.0133441	0.971913	-34.7954	30.4413	-30.4413	3.50316e-05	-34.5104	31.0114	-31.0114	3.46082e-07
CUT903	bothEndsMapped	-36.0081	-28.016	28.016	0.0401085	-22.3728	0.913954	-0.913954	0.421635	-21.8174	0.0504915	-0.0504915	1	-36.4581	27.1159	-27.1159	0.192139	-35.9428	28.1464	-28.1464	0.0299618
CUT904	mapped3	-35.9547	-28.1228	28.1228	0.0401085	-21.2739	-1.01917	1.01917	0.113288	-21.9363	0.552218	-0.552218	0.62184	-35.4241	29.184	-29.184	0.00233634	-36.1251	27.7819	-27.7819	0.0720844
CUT905	bothEndsMapped	-21.0306	-5.09033	5.09033	5.28218e-06	-18.3817	0.000826021	-0.000826021	1	-18.3132	0.110412	-0.110412	0.798501	-20.9829	5.07173	-5.07173	1.65317e-07	-20.8753	4.97509	-4.97509	1.18082e-07
CUT906	mapped5	-35.5699	-28.8924	28.8924	0.0202953	-21.2405	0.437279	-0.437279	0.601999	-21.4758	1.15465	-1.15465	0.091997	-35.7714	28.4893	-28.4893	0.0303834	-36.0498	27.9326	-27.9326	0.0498917
CUT907	mapped5	-35.1257	-29.7808	29.7808	0.00083094	-19.9794	-0.336101	0.336101	0.577553	-20.1242	0.200556	-0.200556	0.735499	-34.9435	30.1452	-30.1452	0.000233109	-35.1349	29.7623	-29.7623	0.00043075
CUT908	bothEndsMapped	-35.3978	-29.2365	29.2365	0.00688484	-20.4374	-0.47538	0.47538	0.426935	-20.6123	0.121103	-0.121103	0.858892	-35.1418	29.7486	-29.7486	0.00139891	-35.3507	29.3307	-29.3307	0.00397137
CUT909	mapped5	-20.6694	-1.81286	1.81286	0.0403608	-19.8287	0.325904	-0.325904	0.478405	-19.6082	0.131814	-0.131814	0.799793	-20.7818	1.47379	-1.47379	0.110428	-20.5298	1.66598	-1.66598	0.0399268
CUT910	bothEndsMapped	-35.1922	-29.6477	29.6477	0.00118389	-20.2741	0.0262203	-0.0262203	1	-19.9743	-0.326778	0.326778	0.530726	-35.1819	29.6683	-29.6683	0.00284521	-34.9238	30.1845	-30.1845	4.29071e-05
CUT911	bothEndsMapped	-21.8852	-3.3813	3.3813	0.00738146	-20.7323	1.30715	-1.30715	0.0257857	-20.2093	0.507475	-0.507475	0.361078	-22.4822	2.07298	-2.07298	0.203051	-21.9267	2.8723	-2.8723	0.0142984
CUT912	bothEndsMapped	-20.8158	-0.876072	0.876072	0.312474	-20.4359	0.293078	-0.293078	0.537107	-19.8019	-0.727837	0.727837	0.133719	-20.9166	0.560325	-0.560325	0.605132	-20.253	1.57585	-1.57585	0.0292453
CUT913	bothEndsMapped	-20.7433	-2.49514	2.49514	0.0114075	-19.6243	0.472524	-0.472524	0.365548	-19.5227	0.515758	-0.515758	0.247635	-20.9315	2.0046	-2.0046	0.0264827	-20.7852	1.98531	-1.98531	0.0201045
CUT914	bothEndsMapped	-21.1374	-2.87674	2.87674	0.00549912	-19.2899	-0.622631	0.622631	0.1732	-19.772	0.588439	-0.588439	0.226558	-20.7788	3.47985	-3.47985	7.23629e-05	-21.2285	2.26854	-2.26854	0.015323
CUT915	bothEndsMapped	-34.4671	-31.0979	31.0979	8.4558e-07	-18.7784	-0.0569405	0.0569405	0.916363	-18.761	0.154611	-0.154611	0.73462	-34.4141	31.204	-31.204	1.31027e-07	-34.437	31.1581	-31.1581	1.04809e-07
CUT916	mapped5	-35.3492	-29.3336	29.3336	0.00388256	-21.5925	2.00682	-2.00682	0.00350248	-20.8518	0.772268	-0.772268	0.203926	-36.3372	27.3576	-27.3576	0.192139	-35.6421	28.7479	-28.7479	0.0214401
CUT917	mapped5	-21.8618	-1.42793	1.42793	0.294112	-21.1398	0.224114	-0.224114	0.801615	-20.5023	-0.804683	0.804683	0.114706	-21.9192	1.19917	-1.19917	0.343527	-21.2362	2.25319	-2.25319	0.0196876
CUT918	bothEndsMapped	-36.0227	-27.9867	27.9867	0.0627738	-21.3834	-1.05347	1.05347	0.124436	-21.3261	-0.921845	0.921845	0.141531	-35.468	29.0961	-29.0961	0.0035211	-35.451	29.13	-29.13	0.00740752
CUT919	bothEndsMapped	-19.7333	-3.04117	3.04117	0.000174841	-18.4124	0.614715	-0.614715	0.138587	-18.1568	0.349975	-0.349975	0.377864	-19.99	2.41354	-2.41354	0.000506628	-19.6948	2.6922	-2.6922	8.33484e-05
CUT920	mapped3	-36.4012	-27.2297	27.2297	0.221984	-22.2674	-0.824608	0.824608	0.421635	-22.1086	-0.895529	0.895529	0.222025	-35.9674	28.0974	-28.0974	0.0726459	-35.8505	28.3311	-28.3311	0.0985698
CUT921	bothEndsMapped	-33.9652	-32.1017	32.1017	8.24803e-09	-18.0242	0.439265	-0.439265	0.278507	-17.8916	0.420444	-0.420444	0.298489	-34.1615	31.7091	-31.7091	1.00673e-09	-34.069	31.8941	-31.8941	3.44419e-10
CUT922	bothEndsMapped	-20.3105	-3.36065	3.36065	0.000150731	-18.3337	-0.396856	0.396856	0.34224	-18.2915	-0.234437	0.234437	0.584864	-20.0663	3.73495	-3.73495	9.88319e-07	-19.9871	3.5814	-3.5814	9.42596e-07
CUT923	bothEndsMapped	-35.7265	-28.5791	28.5791	0.0675844	-22.0873	1.53347	-1.53347	0.0693206	-20.944	-0.506894	0.506894	0.459899	-36.467	27.0982	-27.0982	0.323241	-35.3579	29.3163	-29.3163	0.00356827
CUT924	mapped3	-36.9227	-26.1868	26.1868	0.572849	-22.9388	-1.5422	1.5422	0.182195	-36.8014	26.4293	-26.4293	0.136699	-36.1248	27.7824	-27.7824	0.120799	-50.0161	0	0	1
CUT925	bothEndsMapped	-21.1412	-2.86917	2.86917	0.0065277	-19.7039	0.230485	-0.230485	0.672739	-19.2558	-0.4195	0.4195	0.34264	-21.2008	2.63589	-2.63589	0.0116934	-20.7128	3.29996	-3.29996	0.000124394
ETS1-1	ETS1-1,5'%20ETS	-11.2429	-1.01806	1.01806	0.0746209	-10.5702	-0.139206	0.139206	0.700765	-10.7868	0.54066	-0.54066	0.138025	-11.1295	1.13065	-1.13065	0.00495775	-11.3072	0.463401	-0.463401	0.243267
ETS1-2	ETS1-2,5'%20ETS	-11.2429	-1.01806	1.01806	0.0746209	-10.5702	-0.139206	0.139206	0.700765	-10.7868	0.54066	-0.54066	0.138025	-11.1295	1.13065	-1.13065	0.00495775	-11.3072	0.463401	-0.463401	0.243267
ETS2-1	ETS2-1,3'%20ETS	-20.9772	0.518798	-0.518798	0.461532	-21.1311	0.0310347	-0.0310347	1	-21.1994	0.413719	-0.413719	0.550709	-20.9389	-0.556184	0.556184	0.456742	-20.964	-0.918339	0.918339	0.282094
ETS2-2	ETS2-2,3'%20ETS	-20.9772	0.518798	-0.518798	0.461532	-21.1311	0.0310347	-0.0310347	1	-21.1994	0.413719	-0.413719	0.550709	-20.9389	-0.556184	0.556184	0.456742	-20.964	-0.918339	0.918339	0.282094
HML	HML	-17.4918	-0.956738	0.956738	0.119957	-16.7589	-0.293912	0.293912	0.440511	-16.7387	-0.0877345	0.0877345	0.81681	-17.2943	1.23768	-1.23768	0.00709881	-17.2353	1.0437	-1.0437	0.0194927
HMR	HMR	-19.108	-1.54737	1.54737	0.0263731	-18.3321	0.226212	-0.226212	0.615935	-18.3821	0.572566	-0.572566	0.163622	-19.1682	1.3128	-1.3128	0.0239438	-19.1786	0.980137	-0.980137	0.105984
HRA1	HRA1	-50.0161	0	0	1	-37.5982	-24.8358	24.8358	1	-37.8512	-24.3298	24.3298	1	-37.6294	24.7732	-24.7732	1	-37.8601	24.3118	-24.3118	1
ICR1	ICR1	-17.6824	-0.188794	0.188794	0.833009	-17.8916	0.8213	-0.8213	0.0401263	-17.6537	0.592107	-0.592107	0.133302	-18.044	-0.648539	0.648539	0.11936	-17.7673	-0.407125	0.407125	0.314927
ITS1-1	ITS1-1,ITS1	-11.5333	-1.44512	1.44512	0.0117748	-10.874	0.340187	-0.340187	0.348149	-10.8452	0.529284	-0.529284	0.146526	-11.653	1.0915	-1.0915	0.00666099	-11.5856	0.914493	-0.914493	0.0197389
ITS1-2	ITS1-2,ITS1	-11.5333	-1.44512	1.44512	0.0117748	-10.874	0.340187	-0.340187	0.348149	-10.8452	0.529284	-0.529284	0.146526	-11.653	1.0915	-1.0915	0.00666099	-11.5856	0.914493	-0.914493	0.0197389
ITS2-1	ITS2-1,ITS2	-12.2532	-0.911082	0.911082	0.111861	-11.7305	0.0590561	-0.0590561	0.870986	-11.8728	0.590224	-0.590224	0.10596	-12.2373	0.828615	-0.828615	0.0388948	-12.3402	0.311145	-0.311145	0.448068
ITS2-2	ITS2-2,ITS2	-12.2532	-0.911082	0.911082	0.111861	-11.7305	0.0590561	-0.0590561	0.870986	-11.8728	0.590224	-0.590224	0.10596	-12.2373	0.828615	-0.828615	0.0388948	-12.3402	0.311145	-0.311145	0.448068
LSR1	LSR1,snR20	-10.4094	-1.62601	1.62601	0.00478301	-9.7332	0.484259	-0.484259	0.181972	-9.94993	1.16427	-1.16427	0.00156552	-10.6019	1.12688	-1.12688	0.00507042	-10.781	0.456748	-0.456748	0.250029
MATALPHA	MATALPHA,MAT	-17.4844	-0.942	0.942	0.128433	-16.7556	-0.300575	0.300575	0.430358	-16.8404	0.115656	-0.115656	0.770108	-17.2836	1.22958	-1.22958	0.00754036	-17.3298	0.825324	-0.825324	0.0701537
NME1	NME1,RRP2	-13.3373	-1.88317	1.88317	0.00126084	-12.5108	0.409395	-0.409395	0.260049	-12.7893	1.21281	-1.21281	0.00102334	-13.5004	1.44294	-1.44294	0.000430186	-13.7404	0.650969	-0.650969	0.100869
NTS1-2	NTS1-2,NTS1	-20.6971	0.242529	-0.242529	0.623154	-20.9529	0.494836	-0.494836	0.417267	-20.7046	0.244559	-0.244559	0.782085	-20.8888	-0.740026	0.740026	0.263513	-20.609	-0.492373	0.492373	0.46412
NTS2-1	NTS2-1	-18.6164	-0.409101	0.409101	0.588326	-18.5694	0.512736	-0.512736	0.226198	-17.9396	-0.500172	0.500172	0.21858	-18.8268	-0.125871	0.125871	0.744383	-18.1571	0.901667	-0.901667	0.0692516
NTS2-2	NTS2-2,NTS2	-18.6164	-0.409101	0.409101	0.588326	-18.5694	0.512736	-0.512736	0.226198	-17.9396	-0.500172	0.500172	0.21858	-18.8268	-0.125871	0.125871	0.744383	-18.1571	0.901667	-0.901667	0.0692516
PWR1	PWR1	-36.8847	-26.2627	26.2627	0.335543	-23.6119	-0.0888624	0.0888624	1	-23.603	0.140448	-0.140448	1	-36.827	26.3781	-26.3781	0.564941	-36.8556	26.321	-26.321	0.564576
Q0010	GO:0003674,GO:0008150,GO:0016021	-22.6772	-1.79712	1.79712	0.331013	-21.7085	0.0683327	-0.0683327	1	-22.8081	2.51425	-2.51425	0.0190475	-22.6594	1.71859	-1.71859	0.552955	-23.7285	-0.73129	0.73129	0.675348
Q0017	GO:0003674,GO:0005575,GO:0008150	-50.0161	0	0	1	-37.0943	-25.8435	25.8435	0.507681	-50.0161	0	0	1	-37.1267	25.7787	-25.7787	1	-50.0161	0	0	1
Q0032	GO:0003674,GO:0008150,GO:0016021	-23.0266	0.901649	-0.901649	0.715347	-23.7698	0.805662	-0.805662	0.701273	-23.2774	0.0675044	-0.0675044	1	-23.3781	-1.71862	1.71862	0.357664	-22.8537	-0.981826	0.981826	0.735978
Q0045	COX1,OXI3	-8.94041	-0.62949	0.62949	0.280245	-8.71579	0.392131	-0.392131	0.279261	-8.61462	0.436351	-0.436351	0.230648	-9.087	0.22217	-0.22217	0.611206	-8.94578	0.19276	-0.19276	0.65791
Q0050	AI1	-24.0023	0.683823	-0.683823	0.62031	-24.1376	-0.198159	0.198159	1	-24.2792	0.331643	-0.331643	1	-23.8532	-0.49967	0.49967	1	-23.9562	-1.01754	1.01754	0.612956
Q0055	AI2	-23.3371	0.70014	-0.70014	0.679723	-23.5021	-0.156902	0.156902	1	-23.6562	0.397861	-0.397861	0.742407	-23.2092	-0.558497	0.558497	0.675538	-23.3247	-1.10132	1.10132	0.357042
Q0060	AI3	-23.2667	0.706865	-0.706865	0.432676	-23.4375	-0.152478	0.152478	1	-23.59	0.39934	-0.39934	1	-23.1411	-0.569798	0.569798	0.675538	-23.2552	-1.10978	1.10978	0.420671
Q0065	AI4	-22.7318	0.673937	-0.673937	0.531259	-22.8695	-0.185602	0.185602	1	-23.0279	0.377889	-0.377889	0.793223	-22.5899	-0.504311	0.504311	0.705313	-22.7096	-1.05559	1.05559	0.476922
Q0070	AI5_ALPHA	-22.5118	0.701477	-0.701477	0.767137	-22.6529	-0.206893	0.206893	1	-22.8081	0.350127	-0.350127	0.8105	-22.3594	-0.510928	0.510928	0.514242	-22.4759	-1.05568	1.05568	0.513433
Q0075	AI5_BETA	-27.2228	1.26138	-1.26138	1	-27.6645	-0.15603	0.15603	1	-27.7481	0.257578	-0.257578	1	-27.0929	-1.11568	1.11568	1	-27.1381	-1.51794	1.51794	1
Q0080	ATP8,AAP1	-17.3582	-0.176688	0.176688	0.852313	-17.2716	0.207967	-0.207967	0.58358	-17.2234	0.358239	-0.358239	0.357165	-17.4129	-0.0468042	0.0468042	0.845296	-17.3283	-0.189638	0.189638	0.608665
Q0085	ATP6,OLI2,OLI4,PHO1	-13.3424	-0.701498	0.701498	0.227545	-13.0864	0.415977	-0.415977	0.253016	-13.11	0.709586	-0.709586	0.0528378	-13.4973	0.277643	-0.277643	0.516035	-13.481	-0.00172097	0.00172097	0.929763
Q0092	GO:0003674,GO:0005575,GO:0008150	-50.0161	0	0	1	-50.0161	0	0	1	-37.8512	-24.3298	24.3298	1	-50.0161	0	0	1	-37.8601	24.3118	-24.3118	1
Q0105	COB,COB1,CYTB	-10.7681	-1.04485	1.04485	0.0672036	-10.4621	0.660808	-0.660808	0.0691633	-10.2589	0.500917	-0.500917	0.169217	-11.0449	0.377029	-0.377029	0.359915	-10.8019	0.551192	-0.551192	0.161651
Q0110	BI2	-22.4693	1.36114	-1.36114	0.370412	-22.6919	-0.705355	0.705355	0.615739	-22.7207	-0.401015	0.401015	1	-22.0689	-0.674483	0.674483	0.390553	-22.0567	-0.961867	0.961867	0.262417
Q0115	BI3	-22.1351	1.46701	-1.46701	0.200719	-22.437	-0.654974	0.654974	0.504402	-22.4511	-0.380089	0.380089	0.836404	-21.7604	-0.831644	0.831644	0.418199	-21.7338	-1.0903	1.0903	0.296416
Q0120	BI4	-21.5476	1.62582	-1.62582	0.0696878	-21.8825	-0.7529	0.7529	0.38484	-21.9599	-0.351357	0.351357	0.736182	-21.1253	-0.895275	0.895275	0.224856	-21.1623	-1.28117	1.28117	0.0720854
Q0130	OLI1,ATP9,OLI3	-9.56981	-0.938529	0.938529	0.100534	-9.56497	1.16981	-1.16981	0.00142404	-9.3872	1.06083	-1.06083	0.0038806	-10.098	-0.231976	0.231976	0.471626	-9.88072	-0.109287	0.109287	0.697833
Q0140	VAR1,VARI	-12.8035	0.170604	-0.170604	0.646426	-13.0216	0.461371	-0.461371	0.204156	-12.6659	-0.00357643	0.00357643	0.991909	-12.9891	-0.655918	0.655918	0.058643	-12.5916	-0.172807	0.172807	0.57486
Q0142	GO:0003674,GO:0005575,GO:0008150	-23.2994	-0.552887	0.552887	1	-22.6411	-0.525758	0.525758	0.615739	-22.2337	-1.0943	1.0943	0.149997	-22.9791	1.07921	-1.07921	1	-22.5448	1.63602	-1.63602	0.209006
Q0143	GO:0003674,GO:0005575,GO:0008150	-50.0161	0	0	1	-50.0161	0	0	1	-37.8426	-24.3469	24.3469	1	-50.0161	0	0	1	-37.8543	24.3236	-24.3236	1
Q0144	Dubious%20open%20reading%20frame%20unlikely%20to%20encode%20a%20protein%2C%20based%20on%20available%20experimental%20and%20comparative%20sequence%20data	-17.3342	-2.30836	2.30836	0.000277231	-17.1462	2.15457	-2.15457	9.42194e-08	-16.0846	0.27781	-0.27781	0.460579	-18.3628	0.136878	-0.136878	0.809831	-17.2586	2.03357	-2.03357	1.24615e-05
Q0160	SCEI,OMEGA	-29.0957	1.19013	-1.19013	1	-29.724	0.288379	-0.288379	1	-29.8418	0.770677	-0.770677	1	-29.188	-1.48877	1.48877	1	-29.2675	-1.95969	1.95969	1
Q0182	GO:0003674,GO:0005575,GO:0008150	-19.9467	0.839298	-0.839298	0.206473	-20.1553	-0.258664	0.258664	0.704837	-20.1208	-0.0803655	0.0803655	0.947088	-19.7788	-0.617638	0.617638	0.258066	-19.7151	-0.802135	0.802135	0.178643
Q0250	COX2,OXI1,OXII	-14.3196	-0.563658	0.563658	0.343679	-14.1237	0.387579	-0.387579	0.289407	-14.2197	0.825994	-0.825994	0.0249574	-14.4628	0.163053	-0.163053	0.731305	-14.5194	-0.261921	0.261921	0.424948
Q0255	GO:0003674,GO:0005739,GO:0008150	-16.388	-0.735254	0.735254	0.221151	-16.1923	0.549662	-0.549662	0.14129	-16.0085	0.428523	-0.428523	0.252392	-16.6143	0.168536	-0.168536	0.756666	-16.3917	0.301829	-0.301829	0.495246
Q0275	COX3,OXI2	-12.7135	-0.290918	0.290918	0.659893	-12.6237	0.339396	-0.339396	0.350284	-12.7003	0.739217	-0.739217	0.0435594	-12.8295	-0.055219	0.055219	0.81434	-12.8665	-0.441107	0.441107	0.188886
Q0297	GO:0003674,GO:0005575,GO:0008150	-24.232	1.83851	-1.83851	0.264923	-24.3753	-1.33168	1.33168	0.636263	-25.4676	1.09946	-1.09946	1	-23.5154	-0.519369	0.519369	0.613281	-24.5687	-2.93788	2.93788	0.114145
R0010W		-15.2615	-0.123302	0.123302	0.909828	-18.5281	6.86087	-6.86087	6.88895e-36	-14.7507	-0.447398	0.447398	0.224289	-18.6502	-6.7682	6.7682	1.93877e-39	-14.8278	0.56471	-0.56471	0.162551
R0020C		-13.6506	0.831563	-0.831563	0.0733031	-17.2379	6.54986	-6.54986	5.77117e-40	-13.9394	0.199435	-0.199435	0.586044	-16.8736	-7.39174	7.39174	6.3616e-60	-13.5394	-1.03515	1.03515	0.00266062
R0030W		-15.308	-0.058766	0.058766	0.996863	-18.5827	6.83974	-6.83974	2.58791e-36	-15.2724	0.465702	-0.465702	0.208432	-18.6738	-6.78691	6.78691	7.54107e-41	-15.3241	-0.399451	0.399451	0.242066
R0040C		-13.2637	-0.107	0.107	0.932988	-16.4563	6.72917	-6.72917	3.32215e-43	-13.147	0.357261	-0.357261	0.327957	-16.575	-6.6297	6.6297	7.39955e-53	-13.2246	-0.24063	0.24063	0.453434
RDN18-1	RDN18-1,RDN18	-4.21305	0.235138	-0.235138	0.556404	-4.24835	0.0331874	-0.0331874	0.926918	-4.36712	0.517274	-0.517274	0.155561	-4.1832	-0.289563	0.289563	0.379321	-4.26332	-0.761673	0.761673	0.0249854
RDN18-2	RDN18-2,RDN18	-4.21305	0.235138	-0.235138	0.556404	-4.24835	0.0331874	-0.0331874	0.926918	-4.36712	0.517274	-0.517274	0.155561	-4.1832	-0.289563	0.289563	0.379321	-4.26332	-0.761673	0.761673	0.0249854
RDN25-1	RDN25-1,RDN25	-3.32176	0.470056	-0.470056	0.288774	-3.40803	-0.102061	0.102061	0.7779	-3.50964	0.347715	-0.347715	0.339057	-3.22474	-0.390168	0.390168	0.246916	-3.28825	-0.829042	0.829042	0.0148417
RDN25-2	RDN25-2,RDN25	-3.32176	0.470056	-0.470056	0.288774	-3.40803	-0.102061	0.102061	0.7779	-3.50964	0.347715	-0.347715	0.339057	-3.22474	-0.390168	0.390168	0.246916	-3.28825	-0.829042	0.829042	0.0148417
RDN37-1	RDN37-1,RDN37	-2.56679	0.256078	-0.256078	0.528663	-2.60692	0.0231722	-0.0231722	0.948935	-2.72535	0.506582	-0.506582	0.164236	-2.53155	-0.29975	0.29975	0.364246	-2.61167	-0.771833	0.771833	0.0231489
RDN37-2	RDN37-2,RDN37	-2.56679	0.256078	-0.256078	0.528663	-2.60692	0.0231722	-0.0231722	0.948935	-2.72535	0.506582	-0.506582	0.164236	-2.53155	-0.29975	0.29975	0.364246	-2.61167	-0.771833	0.771833	0.0231489
RDN5-1	RDN5-1,RDN5	-10.6965	-0.266791	0.266791	0.692646	-11.0377	1.15293	-1.15293	0.00167089	-10.9525	1.22909	-1.22909	0.000859914	-11.2255	-0.905385	0.905385	0.00927337	-11.1034	-0.972919	0.972919	0.00439147
RDN5-2	RDN5-2,RDN5	-10.6997	-0.268339	0.268339	0.690306	-11.0401	1.15301	-1.15301	0.00167066	-10.9559	1.23102	-1.23102	0.000843699	-11.2288	-0.903927	0.903927	0.00938246	-11.1075	-0.973314	0.973314	0.00437832
RDN5-3	RDN5-3,RDN5	-10.6997	-0.268339	0.268339	0.690306	-11.0401	1.15301	-1.15301	0.00167066	-10.9559	1.23102	-1.23102	0.000843699	-11.2288	-0.903927	0.903927	0.00938246	-11.1075	-0.973314	0.973314	0.00437832
RDN5-4	RDN5-4,RDN5	-10.6997	-0.268339	0.268339	0.690306	-11.0401	1.15301	-1.15301	0.00167066	-10.9559	1.23102	-1.23102	0.000843699	-11.2288	-0.903927	0.903927	0.00938246	-11.1075	-0.973314	0.973314	0.00437832
RDN5-5	RDN5-5,RDN5	-10.6997	-0.268339	0.268339	0.690306	-11.0401	1.15301	-1.15301	0.00167066	-10.9559	1.23102	-1.23102	0.000843699	-11.2288	-0.903927	0.903927	0.00938246	-11.1075	-0.973314	0.973314	0.00437832
RDN5-6	RDN5-6,RDN5	-10.6965	-0.266791	0.266791	0.692646	-11.0377	1.15293	-1.15293	0.00167089	-10.9525	1.22909	-1.22909	0.000859914	-11.2255	-0.905385	0.905385	0.00927337	-11.1034	-0.972919	0.972919	0.00439147
RDN58-1	RDN58-1,RDN58	-6.81782	-1.20037	1.20037	0.0353648	-6.4322	0.648504	-0.648504	0.0742788	-6.93629	1.90324	-1.90324	4.05575e-07	-7.09013	0.541609	-0.541609	0.178676	-7.55482	-0.699617	0.699617	0.039162
RDN58-2	RDN58-2,RDN58	-6.81782	-1.20037	1.20037	0.0353648	-6.4322	0.648504	-0.648504	0.0742788	-6.93629	1.90324	-1.90324	4.05575e-07	-7.09013	0.541609	-0.541609	0.178676	-7.55482	-0.699617	0.699617	0.039162
RNA170	RNA170,ETC5	-22.5996	0.0475453	-0.0475453	0.784266	-22.0424	-0.944919	0.944919	0.254955	-22.645	0.506772	-0.506772	0.644688	-22.0788	0.879952	-0.879952	0.597434	-22.6369	-0.54817	0.54817	0.735978
RPM1	RPM1	-15.9257	-0.642001	0.642001	0.283581	-15.8203	0.602431	-0.602431	0.100318	-15.2104	-0.37084	0.37084	0.314901	-16.1863	0.00673279	-0.00673279	0.939743	-15.5365	0.994441	-0.994441	0.0149991
RPR1	RPR1	-14.2356	-0.813008	0.813008	0.160391	-13.5279	-0.420012	0.420012	0.249712	-14.0214	0.813553	-0.813553	0.0269765	-13.9832	1.20362	-1.20362	0.00318723	-14.4379	-0.0174633	0.0174633	0.893751
RUF20	RUF20	-20.3363	-1.47406	1.47406	0.0832606	-19.6785	0.327927	-0.327927	0.48522	-19.8914	1.00078	-1.00078	0.0326919	-20.4604	1.11164	-1.11164	0.151995	-20.6391	0.442457	-0.442457	0.593614
RUF21	RUF21	-22.4303	-2.22645	2.22645	0.182421	-22.3883	2.37164	-2.37164	0.00918212	-21.7603	1.36194	-1.36194	0.057072	-23.5634	-0.153721	0.153721	1	-22.8973	0.866504	-0.866504	0.742558
RUF22	RUF22	-37.4156	-25.2009	25.2009	1	-37.3578	25.3166	-25.3166	0.507681	-25.1227	1.09283	-1.09283	1	-50.0161	0	0	1	-37.8543	24.3236	-24.3236	1
RUF23	RUF23	-36.6188	-26.7945	26.7945	0.335543	-23.6474	1.07651	-1.07651	0.477228	-23.5419	1.1119	-1.1119	0.536332	-37.1314	25.7694	-25.7694	1	-37.0664	25.8992	-25.8992	1
RUF5-1	RUF5-1,RUF5	-20.3993	-2.53921	2.53921	0.00325758	-19.0974	0.138421	-0.138421	0.768092	-18.7671	-0.275653	0.275653	0.52028	-20.4217	2.38022	-2.38022	0.0019965	-20.0529	2.80603	-2.80603	0.000124027
RUF5-2	RUF5-2,RUF5	-20.3993	-2.53921	2.53921	0.00325758	-19.0974	0.138421	-0.138421	0.768092	-18.7671	-0.275653	0.275653	0.52028	-20.4217	2.38022	-2.38022	0.0019965	-20.0529	2.80603	-2.80603	0.000124027
SCR1	SCR1	-11.425	-0.679723	0.679723	0.241476	-10.7484	-0.491308	0.491308	0.175883	-11.181	0.620464	-0.620464	0.089106	-11.137	1.14159	-1.14159	0.00456231	-11.5306	0.0424022	-0.0424022	0.975027
snR10	SNR10	-14.9124	-0.836956	0.836956	0.150572	-14.6058	0.443637	-0.443637	0.22599	-15.1394	1.7573	-1.7573	3.24245e-06	-15.0827	0.382344	-0.382344	0.366226	-15.5778	-0.919825	0.919825	0.0091873
snR11	SNR11	-12.5996	-2.16575	2.16575	0.00024311	-11.295	-0.268376	0.268376	0.459251	-11.6017	0.591636	-0.591636	0.104896	-12.4247	2.4014	-2.4014	1.92433e-08	-12.6933	1.55252	-1.55252	0.000111248
snR128	SNR128	-11.4962	-2.52679	2.52679	2.53314e-05	-10.3098	0.386926	-0.386926	0.285969	-10.3188	0.651449	-0.651449	0.0742631	-11.6345	2.13619	-2.13619	3.80389e-07	-11.6056	1.88212	-1.88212	3.65487e-06
snR13	SNR13	-14.8531	-2.33619	2.33619	0.000103113	-13.9221	0.669649	-0.669649	0.0669816	-13.8488	0.769687	-0.769687	0.0363088	-15.1425	1.64333	-1.64333	9.81705e-05	-15.029	1.55851	-1.55851	0.000154208
snR14	SNR14	-16.3593	-2.5246	2.5246	4.58635e-05	-14.869	-0.253182	0.253182	0.491001	-15.2811	0.817492	-0.817492	0.0278216	-16.1854	2.75825	-2.75825	2.11145e-09	-16.5579	1.70137	-1.70137	9.69675e-05
snR161	SNR161	-16.0327	-1.68532	1.68532	0.00454337	-14.9334	-0.313305	0.313305	0.39475	-15.2233	0.513004	-0.513004	0.163352	-15.8295	1.97768	-1.97768	5.7248e-06	-16.0809	1.16296	-1.16296	0.0055385
snR17a	SNR17A	-12.1302	-1.56647	1.56647	0.00654861	-11.4219	0.328441	-0.328441	0.365185	-11.7832	1.29754	-1.29754	0.000447969	-12.2528	1.20714	-1.20714	0.00282878	-12.5753	0.250313	-0.250313	0.551982
snR17b	SNR17B	-13.2964	-0.734916	0.734916	0.204774	-12.9061	0.135666	-0.135666	0.708682	-13.1715	0.913062	-0.913062	0.0129647	-13.3222	0.56914	-0.56914	0.161237	-13.5478	-0.193901	0.193901	0.53698
snR18	SNR18	-23.4024	-0.844326	0.844326	1	-23.2789	0.82452	-0.82452	0.536122	-23.1598	0.832696	-0.832696	0.580827	-23.7617	0.0116378	-0.0116378	1	-23.6026	0.0179626	-0.0179626	0.675348
snR189	SNR189	-15.2027	-0.635565	0.635565	0.284383	-14.9755	0.395882	-0.395882	0.282199	-14.9057	0.502719	-0.502719	0.171681	-15.3504	0.226022	-0.226022	0.619397	-15.242	0.131027	-0.131027	0.798374
snR19	SNR19	-12.0388	-1.63186	1.63186	0.00469696	-11.309	0.374646	-0.374646	0.301839	-11.4802	0.963551	-0.963551	0.0086333	-12.1785	1.23834	-1.23834	0.00220573	-12.3115	0.660516	-0.660516	0.0931393
snR190	SNR190	-10.6882	0.167167	-0.167167	0.650979	-10.6245	-0.0760529	0.0760529	0.83365	-11.0801	1.08165	-1.08165	0.00326395	-10.5988	-0.102422	0.102422	0.715014	-11.0156	-1.24804	1.24804	0.000265213
snR191	SNR191	-24.3463	0.269958	-0.269958	1	-24.1759	-0.400988	0.400988	1	-24.6436	0.781124	-0.781124	1	-24.0982	0.112187	-0.112187	1	-24.5268	-1.05681	1.05681	0.552522
snR24	SNR24	-30.5114	-2.1597	2.1597	1	-29.9965	1.35209	-1.35209	1	-30.0071	1.61978	-1.61978	1	-31.1355	0.797353	-0.797353	1	-31.1077	0.541064	-0.541064	1
snR3	SNR3	-15.001	-1.33578	1.33578	0.0211819	-13.8351	-0.813746	0.813746	0.0265341	-14.5935	0.949736	-0.949736	0.0103243	-14.5519	2.11982	-2.11982	7.04238e-07	-15.2704	0.371098	-0.371098	0.373674
snR30	SNR30	-10.8996	-0.743733	0.743733	0.197303	-10.2023	-0.467728	0.467728	0.197322	-10.1121	-0.40148	0.40148	0.270127	-10.6232	1.18246	-1.18246	0.00332315	-10.4933	1.13023	-1.13023	0.00407117
snR31	SNR31	-15.6609	-0.910977	0.910977	0.1206	-14.9335	-0.355304	0.355304	0.333958	-15.363	0.750265	-0.750265	0.0437405	-15.4395	1.23959	-1.23959	0.00304104	-15.8292	0.148283	-0.148283	0.762659
snR32	SNR32	-15.3712	-1.40963	1.40963	0.0156393	-14.5533	-0.0460676	0.0460676	0.901799	-14.7525	0.59881	-0.59881	0.104102	-15.3065	1.4248	-1.4248	0.000682112	-15.4661	0.793821	-0.793821	0.051034
snR33	SNR33	-15.6107	-0.867358	0.867358	0.13857	-14.7468	-0.668089	0.668089	0.0693943	-15.115	0.314842	-0.314842	0.393494	-15.232	1.51079	-1.51079	0.00032542	-15.5605	0.541844	-0.541844	0.190493
snR34	SNR34	-14.1472	-1.8977	1.8977	0.00121142	-13.3947	0.615646	-0.615646	0.0916877	-13.4807	1.03417	-1.03417	0.00500816	-14.4026	1.27281	-1.27281	0.00195591	-14.45	0.866093	-0.866093	0.0299976
snR35	SNR35	-12.6112	0.0496438	-0.0496438	0.826745	-12.1714	-0.735994	0.735994	0.0434834	-12.5366	0.240931	-0.240931	0.508552	-12.1983	0.662138	-0.662138	0.0996637	-12.5246	-0.302443	0.302443	0.354841
snR36	SNR36	-16.2665	-2.08499	2.08499	0.000579109	-15.4046	0.577966	-0.577966	0.119153	-15.6534	1.32219	-1.32219	0.000442908	-16.5049	1.49418	-1.49418	0.000644857	-16.7145	0.763079	-0.763079	0.0742942
snR37	SNR37	-12.8957	-2.66281	2.66281	1.09329e-05	-12.1193	1.31348	-1.31348	0.000366336	-12.2271	1.77563	-1.77563	2.15554e-06	-13.5047	1.3306	-1.3306	0.00111569	-13.5736	0.881015	-0.881015	0.0258748
snR38	SNR38	-25.6311	0.064239	-0.064239	1	-25.6798	0.250988	-0.250988	1	-25.809	0.755985	-0.755985	1	-25.7056	-0.327218	0.327218	1	-25.7972	-0.822337	0.822337	1
snR39	SNR39	-25.4674	-2.12818	2.12818	1	-24.8873	1.18822	-1.18822	1	-24.6828	1.02572	-1.02572	0.636351	-26.0104	0.928025	-0.928025	1	-25.7674	1.10214	-1.10214	1
snR39B	SNR39B	-15.5631	-1.10649	1.10649	0.05773	-15.2792	0.735459	-0.735459	0.0466178	-15.254	0.931681	-0.931681	0.0123707	-15.885	0.348592	-0.348592	0.424793	-15.82	0.166669	-0.166669	0.726766
snR4	SNR4	-12.5305	-3.02794	3.02794	9.16498e-07	-11.2275	0.65273	-0.65273	0.0727506	-11.0447	0.533743	-0.533743	0.14318	-12.8024	2.36995	-2.36995	2.9158e-08	-12.5816	2.49969	-2.49969	2.95559e-09
snR40	SNR40	-12.1781	-1.38585	1.38585	0.0156623	-11.9446	1.13923	-1.13923	0.00190521	-11.8905	1.27771	-1.27771	0.000543275	-12.6961	0.235692	-0.235692	0.588697	-12.6037	0.108685	-0.108685	0.832534
snR41	SNR41	-14.5596	-2.52268	2.52268	3.05075e-05	-13.2516	0.0880971	-0.0880971	0.808079	-13.4968	0.825133	-0.825133	0.0246413	-14.5616	2.40444	-2.40444	3.03574e-08	-14.7677	1.68035	-1.68035	4.51346e-05
snR42	SNR42	-13.7463	-1.67041	1.67041	0.0039791	-12.7403	-0.165213	0.165213	0.649632	-13.2	1.0008	-1.0008	0.00657163	-13.6227	1.8033	-1.8033	1.5363e-05	-14.0425	0.652003	-0.652003	0.101416
snR43	SNR43	-14.4091	-1.68054	1.68054	0.00394218	-13.5246	0.131142	-0.131142	0.720223	-13.8242	0.976741	-0.976741	0.00803698	-14.423	1.53856	-1.53856	0.000209167	-14.6837	0.705447	-0.705447	0.0786961
snR44	SNR44	-23.1082	0.613332	-0.613332	0.715347	-23.599	0.599863	-0.599863	1	-23.7573	1.16279	-1.16279	0.47741	-23.3546	-1.22041	1.22041	0.613281	-23.4729	-1.76885	1.76885	0.357042
snR45	SNR45	-12.9246	-1.74631	1.74631	0.00262028	-12.0323	0.165058	-0.165058	0.649496	-12.4686	1.28435	-1.28435	0.000517042	-12.9592	1.56292	-1.56292	0.000142461	-13.3554	0.458767	-0.458767	0.250948
snR46	SNR46	-14.7231	-1.43659	1.43659	0.0132269	-14.0175	0.236319	-0.236319	0.516952	-14.6207	1.68928	-1.68928	7.29635e-06	-14.792	1.18468	-1.18468	0.00412506	-15.3553	-0.253907	0.253907	0.450788
snR47	SNR47	-13.6296	-1.67541	1.67541	0.00387166	-13.0938	0.829628	-0.829628	0.0233632	-13.2124	1.31353	-1.31353	0.000392978	-13.9911	0.838192	-0.838192	0.0386821	-14.0708	0.367001	-0.367001	0.370743
snR48	SNR48	-12.2488	-2.05102	2.05102	0.000474449	-11.4282	0.636943	-0.636943	0.079911	-11.5209	1.06875	-1.06875	0.00365512	-12.5138	1.40697	-1.40697	0.000555582	-12.5673	0.988012	-0.988012	0.0121592
snR49	SNR49	-16.2705	-2.15303	2.15303	0.000403368	-15.232	0.294058	-0.294058	0.42495	-15.818	1.71259	-1.71259	7.14796e-06	-16.3663	1.84722	-1.84722	3.08291e-05	-16.9136	0.440849	-0.440849	0.32223
snR5	SNR5	-14.4724	-0.515874	0.515874	0.391122	-14.0585	-0.115423	0.115423	0.751788	-14.4641	0.942529	-0.942529	0.0107885	-14.3688	0.608885	-0.608885	0.135941	-14.7348	-0.435041	0.435041	0.203269
snR50	SNR50	-15.308	-0.721884	0.721884	0.220496	-15.282	0.901556	-0.901556	0.0155055	-15.3344	1.25299	-1.25299	0.000806289	-15.7046	-0.18558	0.18558	0.570756	-15.7178	-0.523718	0.523718	0.135555
snR51	SNR51	-14.4813	-2.07854	2.07854	0.000448349	-13.7101	0.762383	-0.762383	0.0370946	-13.8097	1.20819	-1.20819	0.00112374	-14.8095	1.30801	-1.30801	0.00161126	-14.868	0.879079	-0.879079	0.0285389
snR52	SNR52	-12.4136	-0.226124	0.226124	0.751856	-12.4178	0.452743	-0.452743	0.213175	-12.9605	1.78467	-1.78467	1.98769e-06	-12.5885	-0.237939	0.237939	0.464056	-13.0915	-1.5558	1.5558	6.29329e-06
snR53	SNR53	-15.7965	-3.34154	3.34154	1.88597e-07	-15.1562	2.30172	-2.30172	2.25227e-09	-15.1881	2.61206	-2.61206	2.37464e-11	-16.8904	1.03964	-1.03964	0.0194448	-16.8835	0.741554	-0.741554	0.0888004
snR54	SNR54	-24.9363	-0.931165	0.931165	1	-24.8588	0.99892	-0.99892	1	-25.0876	1.70291	-1.70291	0.636351	-25.3842	-0.0786589	0.0786589	1	-25.5743	-0.77084	0.77084	0.552522
snR55	SNR55	-15.163	-1.22388	1.22388	0.0349652	-14.8953	0.907561	-0.907561	0.0143026	-15.5357	2.43482	-2.43482	4.26076e-10	-15.5657	0.304276	-0.304276	0.482058	-16.167	-1.21024	1.21024	0.00089789
snR56	SNR56	-13.5385	0.387732	-0.387732	0.37312	-14.1558	1.06432	-1.06432	0.00388424	-14.2036	1.40661	-1.40661	0.000161184	-14.0196	-1.46425	1.46425	3.41648e-05	-14.0277	-1.79231	1.79231	2.3999e-07
snR57	SNR57	-16.3944	-1.47696	1.47696	0.0127526	-16.5057	1.85528	-1.85528	1.36856e-06	-15.903	0.896516	-0.896516	0.0173084	-17.2842	-0.416876	0.416876	0.261766	-16.6445	0.550775	-0.550775	0.192266
snR58	SNR58	-14.2413	-2.97806	2.97806	1.48791e-06	-13.2622	1.24249	-1.24249	0.000753186	-13.497	1.95868	-1.95868	2.1841e-07	-14.8102	1.726	-1.726	4.13738e-05	-15.0057	1.02333	-1.02333	0.0112916
snR59	SNR59	-24.5791	-2.40749	2.40749	1	-23.6063	0.681576	-0.681576	1	-23.6344	0.984367	-0.984367	0.742407	-24.8686	1.71427	-1.71427	1	-24.8595	1.42079	-1.42079	1
snR6	SNR6	-17.4971	-2.44154	2.44154	0.000141982	-16.0648	-0.229623	0.229623	0.542829	-16.5303	0.94795	-0.94795	0.0128295	-17.3373	2.647	-2.647	5.23696e-08	-17.7644	1.48091	-1.48091	0.0018016
snR60	SNR60	-13.812	-2.15459	2.15459	0.000274074	-13.1156	0.979746	-0.979746	0.00752286	-13.0519	1.09902	-1.09902	0.00287114	-14.2507	1.16307	-1.16307	0.00447663	-14.1478	1.05701	-1.05701	0.00812047
snR61	SNR61	-12.5867	-0.0308038	0.0308038	0.950884	-12.5856	0.248163	-0.248163	0.494074	-12.6381	0.599838	-0.599838	0.100685	-12.6594	-0.228644	0.228644	0.478593	-12.6727	-0.567193	0.567193	0.0942594
snR62	SNR62	-16.1433	-3.30228	3.30228	2.76758e-07	-15.1894	1.60985	-1.60985	1.97609e-05	-15.7886	3.05491	-3.05491	2.8029e-14	-16.8981	1.67848	-1.67848	0.000201061	-17.4592	0.244515	-0.244515	0.63183
snR63	SNR63	-12.8612	-1.80817	1.80817	0.00187955	-11.8459	-0.0442137	0.0442137	0.903341	-12.1795	0.869607	-0.869607	0.017712	-12.7978	1.82075	-1.82075	1.17754e-05	-13.0911	0.922379	-0.922379	0.0193006
snR64	SNR64	-11.5334	-0.94792	0.94792	0.0974307	-11.5591	1.23351	-1.23351	0.000793514	-11.626	1.61388	-1.61388	1.48772e-05	-12.0949	-0.289122	0.289122	0.381725	-12.124	-0.659304	0.659304	0.0524379
snR65	SNR65	-15.0482	-1.85532	1.85532	0.00165526	-14.703	1.38654	-1.38654	0.000202136	-14.811	1.84908	-1.84908	1.0429e-06	-15.6897	0.458275	-0.458275	0.279979	-15.7586	0.00867655	-0.00867655	0.954459
snR66	SNR66	-13.8914	-2.85396	2.85396	3.29074e-06	-12.7884	0.871397	-0.871397	0.0171292	-12.7443	1.0298	-1.0298	0.00513143	-14.2747	1.97326	-1.97326	3.11669e-06	-14.1913	1.82827	-1.82827	8.83387e-06
snR67	SNR67	-14.5833	-1.65523	1.65523	0.00449141	-13.8876	0.479993	-0.479993	0.188944	-14.1105	1.17234	-1.17234	0.00155442	-14.7726	1.16243	-1.16243	0.00477183	-14.956	0.483772	-0.483772	0.234419
snR68	SNR68	-14.1157	-2.33106	2.33106	9.73134e-05	-13.1077	0.543549	-0.543549	0.135939	-13.3753	1.32519	-1.32519	0.000352711	-14.3336	1.78109	-1.78109	2.20797e-05	-14.5616	1.01312	-1.01312	0.0114096
snR69	SNR69	-14.0077	-2.57476	2.57476	2.09962e-05	-13.1442	1.05834	-1.05834	0.00394386	-13.4899	1.99617	-1.99617	1.33233e-07	-14.4876	1.50069	-1.50069	0.000297466	-14.7934	0.577238	-0.577238	0.151168
snR7-L	SNR7-L,SNR7	-15.395	-1.15369	1.15369	0.0470977	-14.3834	-0.688453	0.688453	0.0608768	-15.0377	0.866864	-0.866864	0.0192723	-15.0088	1.81192	-1.81192	1.9338e-05	-15.6236	0.270525	-0.270525	0.530883
snR7-S	SNR7-S,SNR7	-20.3281	0.540279	-0.540279	0.403359	-20.431	-0.132272	0.132272	0.85861	-20.5383	0.329105	-0.329105	0.618125	-20.2168	-0.431736	0.431736	0.503852	-20.2909	-0.891934	0.891934	0.19178
snR70	SNR70	-14.5718	-1.55046	1.55046	0.00758462	-14.205	1.04971	-1.04971	0.00444939	-14.5495	1.98527	-1.98527	1.7022e-07	-15.0418	0.496188	-0.496188	0.233155	-15.3475	-0.426996	0.426996	0.216187
snR71	SNR71	-14.1892	-0.0362109	0.0362109	0.957767	-14.4059	0.691922	-0.691922	0.05959	-14.4942	1.11511	-1.11511	0.00262217	-14.483	-0.665528	0.665528	0.0588482	-14.5324	-1.07625	1.07625	0.00197008
snR72	SNR72,Z2	-15.5129	-1.44603	1.44603	0.0134452	-14.8762	0.3828	-0.3828	0.298891	-14.942	0.760933	-0.760933	0.0393203	-15.6552	1.04729	-1.04729	0.0127213	-15.6821	0.681647	-0.681647	0.0979476
snR73	SNR73,Z3	-13.0095	-3.70146	3.70146	7.64668e-09	-11.8348	1.58057	-1.58057	2.04776e-05	-11.9943	2.14618	-2.14618	1.52785e-08	-13.7459	2.11454	-2.11454	6.09286e-07	-13.8668	1.56088	-1.56088	0.000115627
snR74	SNR74,Z4	-16.5426	-1.80781	1.80781	0.00271657	-15.8852	0.706239	-0.706239	0.0579494	-15.6033	0.388993	-0.388993	0.291758	-16.8457	1.08749	-1.08749	0.0134686	-16.5255	1.416	-1.416	0.00104935
snR75	SNR75,Z5	-18.5898	-0.357215	0.357215	0.61558	-18.0327	-0.569733	0.569733	0.158689	-18.5001	0.611704	-0.611704	0.135253	-18.263	0.896686	-0.896686	0.0768712	-18.6922	-0.273495	0.273495	0.520002
snR76	SNR76,Z6	-13.6557	-2.62562	2.62562	1.45251e-05	-12.6361	0.794551	-0.794551	0.0295365	-12.929	1.62698	-1.62698	1.32369e-05	-14.0041	1.81452	-1.81452	1.4562e-05	-14.2579	0.995251	-0.995251	0.0126421
snR77	SNR77,Z7	-12.7827	-1.32504	1.32504	0.0208515	-12.5538	1.09682	-1.09682	0.0027966	-12.3208	0.87738	-0.87738	0.0167247	-13.2772	0.221878	-0.221878	0.615102	-13.0055	0.453418	-0.453418	0.257138
snR78	SNR78,Z8	-12.599	-0.55273	0.55273	0.350328	-12.6682	0.925487	-0.925487	0.0114004	-12.6175	1.07065	-1.07065	0.00362805	-13.0068	-0.376976	0.376976	0.265055	-12.9176	-0.510548	0.510548	0.130618
snR79	SNR79,Z9	-17.3429	-1.00992	1.00992	0.101638	-17.1526	0.842492	-0.842492	0.0296128	-16.9398	0.663482	-0.663482	0.0863653	-17.7147	0.152253	-0.152253	0.818589	-17.4636	0.342588	-0.342588	0.461971
snR8	SNR8	-12.9745	-0.592682	0.592682	0.313656	-12.433	-0.298012	0.298012	0.412073	-12.6444	0.371367	-0.371367	0.30839	-12.7807	0.866211	-0.866211	0.0311576	-12.953	0.209811	-0.209811	0.627166
snR80	SNR80	-13.8204	-2.67519	2.67519	1.05672e-05	-12.7769	0.78712	-0.78712	0.0310616	-12.7701	1.02005	-1.02005	0.00559843	-14.1677	1.86632	-1.86632	8.89433e-06	-14.1191	1.65171	-1.65171	5.07481e-05
snR81	SNR81	-16.3813	-0.25685	0.25685	0.720475	-15.6788	-0.968484	0.968484	0.00966674	-16.0424	0.00537477	-0.00537477	0.991761	-15.8556	1.19402	-1.19402	0.004761	-16.18	0.233368	-0.233368	0.606671
snR82	SNR82,RUF2	-14.0424	-1.99627	1.99627	0.000698523	-12.8812	-0.128554	0.128554	0.72395	-12.6189	-0.406565	0.406565	0.265403	-13.9322	2.10262	-2.10262	7.30094e-07	-13.6308	2.39342	-2.39342	1.35079e-08
snR83	SNR83,RUF3	-13.3805	-3.0317	3.0317	9.40666e-07	-12.5861	1.67418	-1.67418	6.98105e-06	-12.4011	1.5507	-1.5507	3.11536e-05	-14.163	1.35244	-1.35244	0.000991539	-13.9391	1.48852	-1.48852	0.000230393
snR84	SNR84,RUF1	-15.0996	-0.592565	0.592565	0.31838	-14.6386	-0.132123	0.132123	0.719901	-15.0212	0.879638	-0.879638	0.0176458	-14.9876	0.70246	-0.70246	0.087348	-15.3309	-0.295986	0.295986	0.383223
snR85	SNR85	-15.0123	-1.06026	1.06026	0.0669131	-13.9756	-0.813991	0.813991	0.0265082	-14.6409	0.763109	-0.763109	0.0384167	-14.559	1.85272	-1.85272	1.14231e-05	-15.1851	0.288566	-0.288566	0.503897
snR86	SNR86	-12.4853	-2.43722	2.43722	4.57924e-05	-11.6639	1.02303	-1.02303	0.0051936	-11.3942	0.730239	-0.730239	0.0457332	-12.9428	1.40804	-1.40804	0.000558896	-12.6347	1.71241	-1.71241	2.28857e-05
snR87	SNR87	-14.7731	-1.28565	1.28565	0.0261485	-14.6714	1.32365	-1.32365	0.000378694	-14.6886	1.60472	-1.60472	1.88041e-05	-15.3781	-0.038532	0.038532	0.854176	-15.3567	-0.307594	0.307594	0.359976
snR9	SNR9	-13.7894	1.25027	-1.25027	0.00802465	-14.0498	-0.512612	0.512612	0.160327	-14.823	1.28043	-1.28043	0.000591124	-13.4823	-0.750049	0.750049	0.0318316	-14.2167	-2.53078	2.53078	4.38981e-13
SRG1	SRG1	-15.2363	-1.47681	1.47681	0.0113738	-14.6677	0.553337	-0.553337	0.131655	-14.5373	0.53912	-0.53912	0.14212	-15.4629	0.909429	-0.909429	0.0287557	-15.294	0.935466	-0.935466	0.0217492
SUT001	NA	-21.6457	1.30969	-1.30969	0.160648	-22.4043	0.406562	-0.406562	0.668428	-22.0361	-0.0830484	0.0830484	1	-21.8004	-1.73326	1.73326	0.0563323	-21.3942	-1.23262	1.23262	0.126725
SUT002	ST3643,ST3644	-18.7902	-1.23134	1.23134	0.0725063	-17.9986	-0.139024	0.139024	0.731252	-17.7467	-0.396132	0.396132	0.311834	-18.672	1.35353	-1.35353	0.0113177	-18.3804	1.6249	-1.6249	0.00142861
SUT003	ST3653	-18.3511	-2.83471	2.83471	4.35784e-05	-16.9084	0.164953	-0.164953	0.681918	-16.6776	-0.05015	0.05015	0.898896	-18.3837	2.65531	-2.65531	7.59885e-07	-18.1133	2.88435	-2.88435	3.48095e-08
SUT004	NA	-16.8159	-0.0369394	0.0369394	0.956134	-16.7851	0.20015	-0.20015	0.60103	-16.5406	-0.0422482	0.0422482	0.913379	-16.8632	-0.171891	0.171891	0.605126	-16.5797	0.0831943	-0.0831943	0.911024
SUT005	ST3689	-20.526	-0.0995806	0.0995806	1	-20.5907	0.415085	-0.415085	0.441644	-20.4133	0.307336	-0.307336	0.581312	-20.6889	-0.340297	0.340297	0.61188	-20.4807	-0.235811	0.235811	0.789703
SUT006	NA	-34.7321	-30.568	30.568	1.60165e-05	-19.2235	-0.250187	0.250187	0.616156	-19.2763	0.10224	-0.10224	0.833685	-34.5873	30.8575	-30.8575	2.06204e-06	-34.6819	30.6682	-30.6682	6.68908e-06
SUT007	NA	-22.2737	1.39574	-1.39574	0.255626	-22.7078	-0.318425	0.318425	0.810362	-22.4714	-0.544508	0.544508	0.534532	-22.0712	-1.10494	1.10494	0.390553	-21.7936	-0.861524	0.861524	0.322798
SUT008	ST3739	-21.0033	-1.97517	1.97517	0.0377096	-19.8683	-0.0894987	0.0894987	0.895051	-19.9858	0.392171	-0.392171	0.410709	-20.9075	2.05262	-2.05262	0.0264827	-20.9875	1.58064	-1.58064	0.102979
SUT009	ST3740	-35.8052	-28.4216	28.4216	0.0613889	-21.1751	-0.636945	0.636945	0.368778	-21.0902	-0.559918	0.559918	0.432668	-35.468	29.0961	-29.0961	0.0035211	-35.4193	29.1935	-29.1935	0.00740752
SUT010	NA	-20.32	-1.86778	1.86778	0.0277672	-19.4854	0.383277	-0.383277	0.432394	-19.4779	0.615086	-0.615086	0.1796	-20.4694	1.45487	-1.45487	0.085857	-20.4251	1.23148	-1.23148	0.128625
SUT011	ST3744	-22.1814	-2.78876	2.78876	0.0576069	-20.3738	-0.595412	0.595412	0.260777	-20.4417	-0.213217	0.213217	0.687678	-21.8304	3.37674	-3.37674	0.00498587	-21.8635	2.9986	-2.9986	0.0115235
SUT012	NA	-22.6838	2.21589	-2.21589	0.100436	-22.9367	-1.4933	1.4933	0.182195	-23.4511	-0.217702	0.217702	1	-21.8845	-0.7315	0.7315	0.390553	-22.3647	-2.00387	2.00387	0.113069
SUT013	ST3751	-18.4282	-0.206334	0.206334	0.852398	-18.5151	0.601303	-0.601303	0.160943	-18.226	0.269584	-0.269584	0.496081	-18.679	-0.409227	0.409227	0.358989	-18.348	-0.0591509	0.0591509	0.828578
SUT014	NA	-17.1588	-0.972632	0.972632	0.111815	-16.5334	-0.0697512	0.0697512	0.863399	-16.6475	0.405008	-0.405008	0.285205	-17.0749	1.02621	-1.02621	0.0232659	-17.1505	0.563243	-0.563243	0.212792
SUT015	ST3787	-20.706	-1.73954	1.73954	0.0518599	-19.6875	-0.102134	0.102134	0.858611	-19.6487	0.0670902	-0.0670902	0.91761	-20.6084	1.82066	-1.82066	0.0235508	-20.5348	1.65594	-1.65594	0.0399268
SUT016	ST3788,ST3789	-17.9537	-1.33575	1.33575	0.0358013	-17.3279	0.294584	-0.294584	0.44624	-17.0622	0.00983284	-0.00983284	0.991803	-18.0508	1.02749	-1.02749	0.0353472	-17.7471	1.32299	-1.32299	0.00506631
SUT017	ST3813	-19.7989	-1.21405	1.21405	0.126259	-18.7589	-0.65352	0.65352	0.131666	-18.5282	-0.868445	0.868445	0.0359598	-19.4197	1.85825	-1.85825	0.00351356	-19.154	2.07775	-2.07775	0.000482643
SUT018	NA	-19.1177	-1.30145	1.30145	0.0701685	-18.6595	0.606394	-0.606394	0.158837	-18.5034	0.540644	-0.540644	0.193007	-19.3703	0.682234	-0.682234	0.269686	-19.1723	0.766379	-0.766379	0.191724
SUT019	NA	-35.3031	-29.426	29.426	0.0029662	-20.7047	0.462243	-0.462243	0.416983	-20.516	0.331336	-0.331336	0.556308	-35.507	29.0181	-29.0181	0.00544446	-35.3543	29.3235	-29.3235	0.00356827
SUT020	NA	-17.1127	-0.282402	0.282402	0.706435	-16.8921	0.0570493	-0.0570493	0.892245	-16.7588	0.0369655	-0.0369655	0.933244	-17.0908	0.212071	-0.212071	0.675655	-16.9185	0.244715	-0.244715	0.597761
SUT021	ST3883	-17.7836	-0.869221	0.869221	0.170757	-17.3916	0.299431	-0.299431	0.453232	-17.2144	0.191746	-0.191746	0.617284	-17.8835	0.55544	-0.55544	0.25353	-17.6671	0.676321	-0.676321	0.148085
SUT022	ST3901	-37.9117	-24.2087	24.2087	1	-23.8698	-3.64796	3.64796	0.00642097	-24.4564	-2.22828	2.22828	0.240188	-36.0579	27.9163	-27.9163	0.120799	-36.6914	26.6494	-26.6494	0.322673
SUT023	ST3912	-19.3781	-0.994636	0.994636	0.196986	-18.5906	-0.365794	0.365794	0.38362	-18.7561	0.211787	-0.211787	0.646343	-19.1444	1.34786	-1.34786	0.0186009	-19.2736	0.777486	-0.777486	0.172424
SUT024	ST3917	-21.7449	-1.66178	1.66178	0.149676	-20.4791	-0.642891	0.642891	0.238309	-20.486	-0.382667	0.382667	0.458914	-21.3678	2.30183	-2.30183	0.020124	-21.3435	2.03856	-2.03856	0.0403238
SUT025	ST3930	-18.6144	-0.206771	0.206771	0.861506	-18.7151	0.626674	-0.626674	0.145231	-18.3637	0.170451	-0.170451	0.701099	-18.8752	-0.428967	0.428967	0.336729	-18.4878	0.0339868	-0.0339868	1
SUT026	NA	-23.5128	2.14896	-2.14896	0.12254	-24.6189	0.293029	-0.293029	1	-24.2012	-0.295824	0.295824	1	-23.6044	-2.44641	2.44641	0.117339	-23.1487	-1.84684	1.84684	0.357042
SUT027	ST3950	-50.0161	0	0	1	-50.0161	0	0	1	-37.8426	-24.3469	24.3469	1	-50.0161	0	0	1	-37.8543	24.3236	-24.3236	1
SUT028	NA	-21.109	-0.289669	0.289669	0.886769	-20.9752	0.22735	-0.22735	0.728818	-20.8992	0.32214	-0.32214	0.686121	-21.1747	0.0442048	-0.0442048	1	-21.0639	-0.0460755	0.0460755	1
SUT029	ST3954	-22.3294	-2.4929	2.4929	0.114512	-21.0656	0.176109	-0.176109	0.905021	-21.5065	1.30459	-1.30459	0.0741675	-22.3706	2.29631	-2.29631	0.14872	-22.7787	1.16832	-1.16832	0.551865
SUT030	ST3959,ST3960	-21.6719	-1.80786	1.80786	0.100135	-20.4245	-0.463912	0.463912	0.426935	-20.547	0.0275371	-0.0275371	1	-21.3901	2.25718	-2.25718	0.020124	-21.4635	1.79865	-1.79865	0.138923
SUT031	NA	-18.93	0.616762	-0.616762	0.270214	-19.1153	-0.053752	0.053752	0.93252	-18.8364	-0.364795	0.364795	0.389186	-18.8609	-0.592789	0.592789	0.215848	-18.5424	-0.26764	0.26764	0.55546
SUT032	ST3973	-19.0908	0.746013	-0.746013	0.179504	-19.0898	-0.556107	0.556107	0.210833	-19.0756	-0.337779	0.337779	0.482835	-18.7685	-0.215552	0.215552	0.612242	-18.7155	-0.421269	0.421269	0.34641
SUT033	NA	-35.6361	-28.7599	28.7599	0.0342382	-21.2983	0.321734	-0.321734	0.786789	-20.8947	-0.239208	0.239208	0.758688	-35.7714	28.4893	-28.4893	0.0303834	-35.4006	29.2309	-29.2309	0.00509791
SUT034	ST3987	-19.7587	-0.99037	0.99037	0.188384	-19.6923	1.07359	-1.07359	0.0313691	-19.3324	0.600299	-0.600299	0.168741	-20.2484	-0.103243	0.103243	0.791123	-19.8465	0.388825	-0.388825	0.640797
SUT035	NA	-35.5657	-28.9007	28.9007	0.0282106	-21.4972	0.988929	-0.988929	0.192076	-20.7879	-0.183157	0.183157	0.771013	-36.0376	27.957	-27.957	0.0726459	-35.3644	29.3034	-29.3034	0.00356827
SUT036	NA	-19.3581	-1.03454	1.03454	0.159056	-18.7505	0.014234	-0.014234	0.972563	-18.3695	-0.50111	0.50111	0.225664	-19.3186	0.999326	-0.999326	0.104586	-18.9016	1.52158	-1.52158	0.00676216
SUT037	NA	-19.3711	-2.06955	2.06955	0.00560823	-18.0442	-0.407264	0.407264	0.323173	-17.865	-0.519003	0.519003	0.196908	-19.1265	2.44462	-2.44462	4.50578e-05	-18.9092	2.56731	-2.56731	1.1308e-05
SUT038	NA	-18.9067	-0.842337	0.842337	0.222476	-18.2405	-0.268537	0.268537	0.515595	-18.3926	0.282329	-0.282329	0.493313	-18.7202	1.10128	-1.10128	0.0363126	-18.8327	0.564305	-0.564305	0.316201
SUT039	NA	-19.1689	-1.41289	1.41289	0.0462662	-18.0914	-0.551071	0.551071	0.175301	-18.2506	0.0140218	-0.0140218	1	-18.8478	1.94102	-1.94102	0.000683019	-18.9706	1.38356	-1.38356	0.0147624
SUT040	ST4009	-21.2979	-2.55583	2.55583	0.0232465	-20.0173	0.211375	-0.211375	0.720686	-19.8474	0.118235	-0.118235	0.86107	-21.3535	2.33047	-2.33047	0.0397567	-21.1474	2.43074	-2.43074	0.013996
SUT041	ST4021,ST4022	-18.4357	-1.3613	1.3613	0.0377524	-17.908	0.529398	-0.529398	0.192877	-17.6891	0.338201	-0.338201	0.385245	-18.6497	0.819195	-0.819195	0.116552	-18.3893	1.02807	-1.02807	0.0483168
SUT042	NA	-18.3847	-0.123616	0.123616	0.927309	-18.2788	0.123066	-0.123066	0.778808	-18.1688	0.149634	-0.149634	0.703199	-18.3964	-0.0139243	0.0139243	0.959831	-18.2476	-0.0281949	0.0281949	0.871216
SUT043	NA	-19.0867	-0.803295	0.803295	0.284029	-18.3719	-0.4108	0.4108	0.317452	-18.4194	-0.0691803	0.0691803	0.862146	-18.8311	1.20027	-1.20027	0.0296569	-18.8403	0.870078	-0.870078	0.107227
SUT044	ST4106,ST4107	-19.7819	-1.24797	1.24797	0.104855	-19.1479	0.195424	-0.195424	0.695192	-18.988	0.122151	-0.122151	0.805274	-19.8276	1.0424	-1.0424	0.123139	-19.6312	1.12341	-1.12341	0.0707537
SUT045	ST4107,ST4108	-20.8269	-0.327874	0.327874	0.810016	-19.99	-1.14929	1.14929	0.024881	-20.252	-0.378459	0.378459	0.512345	-20.2051	1.45734	-1.45734	0.040037	-20.4301	0.695432	-0.695432	0.406473
SUT046	NA	-20.0947	0.207689	-0.207689	0.66011	-20.2179	0.260389	-0.260389	0.632281	-20.41	0.891151	-0.891151	0.1014	-20.1701	-0.472586	0.472586	0.414708	-20.3281	-1.10049	1.10049	0.0774778
SUT047	NA	-20.6699	-0.197041	0.197041	0.907756	-20.3883	-0.173213	0.173213	0.861848	-20.1021	-0.498772	0.498772	0.355207	-20.5355	0.351754	-0.351754	0.768325	-20.2133	0.684313	-0.684313	0.390232
SUT048	NA	-21.2181	-2.71543	2.71543	0.0121054	-19.5253	-0.457323	0.457323	0.329006	-20.1317	1.00206	-1.00206	0.0445818	-20.9394	3.15866	-3.15866	0.000653737	-21.5038	1.71799	-1.71799	0.133753
SUT049	ST4141	-17.8285	-1.9849	1.9849	0.00193476	-17.0987	0.755833	-0.755833	0.0487605	-17.031	0.866997	-0.866997	0.025863	-18.151	1.22576	-1.22576	0.0142134	-18.0472	1.12153	-1.12153	0.0185322
SUT050	ST4158	-50.0161	0	0	1	-50.0161	0	0	1	-50.0161	0	0	1	-50.0161	0	0	1	-50.0161	0	0	1
SUT051	ST4166	-20.2326	-2.04261	2.04261	0.0146425	-19.0848	-0.0245887	0.0245887	0.966411	-18.8439	-0.259987	0.259987	0.538559	-20.1675	2.05863	-2.05863	0.00519554	-19.8873	2.30722	-2.30722	0.000885106
SUT052	NA	-23.6838	0.215894	-0.215894	0.679723	-23.0308	-1.30509	1.30509	0.264401	-23.8369	0.553876	-0.553876	0.701377	-22.9791	1.07921	-1.07921	1	-23.7454	-0.765241	0.765241	0.612956
SUT053	ST4175	-17.1619	-0.370187	0.370187	0.586437	-17.0214	0.295079	-0.295079	0.44898	-16.7732	0.0452809	-0.0452809	0.905653	-17.2623	0.0551581	-0.0551581	0.980044	-16.9741	0.319729	-0.319729	0.494211
SUT054	NA	-35.7629	-28.5063	28.5063	0.0675844	-20.9768	-0.867331	0.867331	0.16841	-21.1163	-0.34155	0.34155	0.575752	-35.3104	29.4112	-29.4112	0.00113854	-35.4996	29.0328	-29.0328	0.00740752
SUT055	NA	-17.7023	-1.10317	1.10317	0.0783826	-17.1988	0.326021	-0.326021	0.408789	-17.0919	0.358762	-0.358762	0.352626	-17.8115	0.770595	-0.770595	0.101629	-17.6656	0.750479	-0.750479	0.10253
SUT056	ST4188	-36.7468	-26.5386	26.5386	0.335543	-21.9063	-2.92118	2.92118	0.000188138	-22.1468	-2.19362	2.19362	0.00375047	-35.2605	29.5111	-29.5111	0.000760861	-35.5474	28.9373	-28.9373	0.0164038
SUT057	NA	-19.6282	-1.5554	1.5554	0.0372262	-18.7661	0.0364022	-0.0364022	0.944917	-18.8397	0.430194	-0.430194	0.3049	-19.5985	1.50073	-1.50073	0.0226717	-19.6319	1.12205	-1.12205	0.0707537
SUT058	NA	-24.681	2.21042	-2.21042	0.264923	-24.425	-2.50847	2.50847	0.240022	-24.0161	-3.07959	3.07959	0.0318453	-23.3774	0.282721	-0.282721	1	-22.934	0.857709	-0.857709	0.742558
SUT059	ST4242	-20.4106	-1.16058	1.16058	0.16043	-20.1458	0.858011	-0.858011	0.101689	-20.3423	1.49747	-1.49747	0.00402056	-20.7878	0.292017	-0.292017	0.741327	-20.9446	-0.333487	0.333487	0.609842
SUT060	ST4244	-18.2773	-0.508187	0.508187	0.465068	-17.9116	-0.000959392	0.000959392	1	-17.978	0.378357	-0.378357	0.351368	-18.2255	0.497691	-0.497691	0.324673	-18.2531	0.130642	-0.130642	0.842923
SUT061	ST4270	-20.0538	-2.40014	2.40014	0.00314835	-18.5074	-0.501168	0.501168	0.250669	-18.4858	-0.297723	0.297723	0.488488	-19.7552	2.8833	-2.8833	1.69624e-05	-19.6996	2.68249	-2.68249	8.33484e-05
SUT062	NA	-36.7468	-26.5386	26.5386	0.335543	-24.2669	1.79988	-1.79988	0.393772	-23.4663	0.445338	-0.445338	1	-37.6247	24.7828	-24.7828	1	-36.8611	26.3099	-26.3099	0.564576
SUT063	NA	-18.7445	-1.01874	1.01874	0.130955	-18.3928	0.522062	-0.522062	0.211331	-18.139	0.260973	-0.260973	0.506722	-18.9579	0.47774	-0.47774	0.432607	-18.664	0.75379	-0.75379	0.148824
SUT064	ST4307	-21.6466	-0.688569	0.688569	0.729465	-21.2767	0.179481	-0.179481	0.89447	-21.0033	-0.121114	0.121114	0.913662	-21.6823	0.503	-0.503	0.639101	-21.3682	0.819213	-0.819213	0.468867
SUT065	NA	-17.3633	-0.380368	0.380368	0.58576	-17.1223	0.131593	-0.131593	0.762254	-16.7394	-0.387855	0.387855	0.306056	-17.3764	0.239985	-0.239985	0.618236	-16.9523	0.776373	-0.776373	0.0813471
SUT066	ST4341	-20.1511	-0.50951	0.50951	0.55958	-19.9025	0.220592	-0.220592	0.68703	-19.73	0.122297	-0.122297	0.870707	-20.2122	0.273324	-0.273324	0.898989	-20.007	0.371823	-0.371823	0.61709
SUT067	NA	-50.0161	0	0	1	-50.0161	0	0	1	-50.0161	0	0	1	-50.0161	0	0	1	-50.0161	0	0	1
SUT068	NA	-20.6476	-1.85646	1.85646	0.0348212	-19.8223	0.439221	-0.439221	0.409563	-19.7926	0.625997	-0.625997	0.173926	-20.8162	1.40512	-1.40512	0.110428	-20.7408	1.24407	-1.24407	0.165282
SUT069	ST4361	-18.3638	-1.25409	1.25409	0.0515039	-17.6332	-0.0102383	0.0102383	1	-17.5341	0.0382482	-0.0382482	0.92187	-18.3123	1.24299	-1.24299	0.0158682	-18.1754	1.20488	-1.20488	0.0155455
SUT070	ST4363	-20.5526	0.293481	-0.293481	0.642909	-20.1367	-0.895776	0.895776	0.0836016	-20.0518	-0.819214	0.819214	0.0941048	-20.0504	0.596898	-0.596898	0.430471	-19.9294	0.526941	-0.526941	0.44482
SUT071	NA	-19.7605	-1.29078	1.29078	0.0894408	-19.1588	0.270661	-0.270661	0.513264	-18.9336	0.0669271	-0.0669271	0.865024	-19.8518	0.994017	-0.994017	0.143654	-19.5888	1.20815	-1.20815	0.0623615
SUT072	NA	-22.4338	-2.28409	2.28409	0.182421	-21.3265	0.265347	-0.265347	0.786789	-21.0909	0.0410727	-0.0410727	1	-22.5228	1.99194	-1.99194	0.283911	-22.2452	2.2353	-2.2353	0.142771
SUT073	NA	-19.6262	-2.72931	2.72931	0.00043942	-18.0511	-0.211243	0.211243	0.610663	-17.9928	-0.0811883	0.0811883	0.849841	-19.4719	2.92377	-2.92377	6.26963e-06	-19.3747	2.80633	-2.80633	1.05076e-05
SUT074	ST4407	-20.3266	0.671604	-0.671604	0.295528	-20.4832	-0.144491	0.144491	0.926417	-20.3219	-0.220659	0.220659	0.760114	-20.2003	-0.533139	0.533139	0.334523	-20	-0.444298	0.444298	0.431607
SUT075	NA	-17.6812	-1.37036	1.37036	0.0280298	-17.0191	0.258546	-0.258546	0.505171	-16.7767	0.0202994	-0.0202994	0.966129	-17.7606	1.09747	-1.09747	0.0231415	-17.4794	1.34788	-1.34788	0.003341
SUT076	NA	-19.039	-1.45894	1.45894	0.0378146	-18.1088	-0.198535	0.198535	0.64605	-17.9451	-0.27935	0.27935	0.487581	-18.8923	1.63821	-1.63821	0.00387656	-18.6904	1.73009	-1.73009	0.00138999
SUT077	NA	-22.2994	1.44711	-1.44711	0.255626	-22.4423	-0.923343	0.923343	0.262695	-22.394	-0.773702	0.773702	0.422069	-21.7848	-0.532081	0.532081	0.788123	-21.6914	-0.657101	0.657101	0.471906
SUT078	ST4457	-17.3032	-0.683741	0.683741	0.266432	-16.846	-0.035883	0.035883	0.943621	-16.6006	-0.280181	0.280181	0.461917	-17.2387	0.698522	-0.698522	0.127364	-16.9556	0.95304	-0.95304	0.0293942
SUT079	NA	-19.6279	-2.72584	2.72584	0.00043942	-18.2282	0.148121	-0.148121	0.747736	-17.9113	-0.239247	0.239247	0.553209	-19.6515	2.56446	-2.56446	0.000107082	-19.293	2.96979	-2.96979	2.70753e-06
SUT080	ST4460	-21.2977	0.613662	-0.613662	0.516521	-21.762	0.481157	-0.481157	0.520027	-22.7396	2.68387	-2.68387	0.00365681	-21.5005	-1.13347	1.13347	0.139089	-22.4417	-3.32765	3.32765	0.00268813
SUT081	NA	-21.1707	-2.81017	2.81017	0.00929459	-19.6015	-0.108709	0.108709	0.864751	-19.56	0.0546525	-0.0546525	0.960582	-21.0659	2.90572	-2.90572	0.00252361	-20.9888	2.74799	-2.74799	0.00332657
SUT082	NA	-21.2449	-0.661785	0.661785	0.556005	-20.7674	-0.0661947	0.0661947	1	-20.8057	0.256857	-0.256857	0.771013	-21.1566	0.724203	-0.724203	0.577419	-21.1628	0.400116	-0.400116	0.736934
SUT083	NA	-21.0459	1.58406	-1.58406	0.0448324	-21.2532	-0.977785	0.977785	0.155162	-21.1171	-1.00295	1.00295	0.0992823	-20.5144	-0.635259	0.635259	0.427678	-20.3438	-0.605844	0.605844	0.434715
SUT084	ST4482	-20.6231	-1.26152	1.26152	0.181037	-19.7402	-0.297834	0.297834	0.580978	-19.7932	0.0548324	-0.0548324	0.954845	-20.426	1.54171	-1.54171	0.059602	-20.4388	1.20416	-1.20416	0.149221
SUT085	NA	-18.1718	-0.719174	0.719174	0.283092	-17.988	0.559094	-0.559094	0.157174	-17.7116	0.25306	-0.25306	0.529267	-18.4015	0.145655	-0.145655	0.843119	-18.0879	0.460939	-0.460939	0.371125
SUT086	NA	-21.7596	-1.63241	1.63241	0.149676	-20.5404	-0.609818	0.609818	0.307353	-20.3512	-0.741296	0.741296	0.155604	-21.4078	2.22188	-2.22188	0.0274236	-21.1853	2.35506	-2.35506	0.00973858
SUT087	NA	-21.5929	0.0341019	-0.0341019	0.849746	-21.6093	0.245933	-0.245933	0.875472	-21.7678	0.808982	-0.808982	0.356321	-21.6555	-0.273577	0.273577	0.801048	-21.7836	-0.841669	0.841669	0.471906
SUT088	NA	-21.2578	-1.46613	1.46613	0.193805	-20.705	0.56612	-0.56612	0.309434	-20.5241	0.451056	-0.451056	0.458914	-21.4892	0.889205	-0.889205	0.393156	-21.2848	0.986111	-0.986111	0.25269
SUT089	NA	-20.595	-0.791695	0.791695	0.36342	-20.0786	-0.0423908	0.0423908	1	-20.2366	0.520374	-0.520374	0.311432	-20.5266	0.814334	-0.814334	0.405859	-20.6482	0.259386	-0.259386	0.887375
SUT090	ST4543	-18.5438	-0.554332	0.554332	0.429737	-17.8031	-0.740591	0.740591	0.0657818	-17.7596	-0.580831	0.580831	0.143888	-18.1298	1.26805	-1.26805	0.0119305	-18.048	1.11987	-1.11987	0.0209727
SUT091	ST4576	-17.2564	-1.92374	1.92374	0.00205444	-16.2957	0.233815	-0.233815	0.534928	-16.1418	0.172475	-0.172475	0.650434	-17.3188	1.68485	-1.68485	0.000330893	-17.1259	1.75869	-1.75869	0.000101221
SUT092	NA	-19.484	-1.26479	1.26479	0.0991752	-18.6534	-0.212976	0.212976	0.650986	-18.5548	-0.163395	0.163395	0.727178	-19.3331	1.45245	-1.45245	0.0144898	-19.1997	1.40737	-1.40737	0.0180391
SUT093	NA	-17.0862	-1.80924	1.80924	0.00333774	-16.2709	0.387101	-0.387101	0.30566	-15.9525	-0.00306022	0.00306022	0.99612	-17.2314	1.40467	-1.40467	0.00199401	-16.8737	1.80826	-1.80826	4.90441e-05
SUT094	ST4592	-50.0161	0	0	1	-50.0161	0	0	1	-50.0161	0	0	1	-50.0161	0	0	1	-50.0161	0	0	1
SUT095	NA	-36.8943	-26.2434	26.2434	0.572849	-23.4078	-0.524075	0.524075	1	-23.1356	-0.821723	0.821723	0.580827	-36.617	26.7981	-26.7981	0.323241	-36.3742	27.2838	-27.2838	0.191544
SUT096	NA	-19.285	-1.93768	1.93768	0.0071482	-18.4534	0.481444	-0.481444	0.257657	-18.3059	0.43308	-0.43308	0.290706	-19.4769	1.43982	-1.43982	0.0241316	-19.2917	1.49841	-1.49841	0.0138103
SUT097	ST4645	-21.0671	-0.373642	0.373642	0.888566	-20.5649	-0.397777	0.397777	0.506555	-21.3858	1.49022	-1.49022	0.0122825	-20.8136	0.766464	-0.766464	0.344139	-21.5912	-1.10057	1.10057	0.228283
SUT098	NA	-17.3489	-0.788054	0.788054	0.199128	-16.9408	0.179502	-0.179502	0.644296	-16.8242	0.19293	-0.19293	0.618185	-17.3907	0.590201	-0.590201	0.205982	-17.2349	0.590038	-0.590038	0.189338
SUT099	NA	-17.2569	-0.593077	0.593077	0.352118	-16.9381	0.174621	-0.174621	0.644296	-16.6806	-0.0936618	0.0936618	0.811302	-17.2922	0.408333	-0.408333	0.405874	-16.9964	0.688006	-0.688006	0.117657
SUT100	NA	-34.5576	-30.9169	30.9169	2.7095e-06	-18.893	-0.224882	0.224882	0.627224	-18.6214	-0.521153	0.521153	0.211809	-34.4295	31.1731	-31.1731	2.20277e-07	-34.1998	31.6325	-31.6325	5.21562e-09
SUT101	ST4676,ST4677	-21.036	-1.07961	1.07961	0.386405	-20.0159	-0.736062	0.736062	0.136845	-19.8022	-0.917117	0.917117	0.0454969	-20.6156	1.80637	-1.80637	0.0235508	-20.3645	1.99672	-1.99672	0.0118389
SUT102	ST4682,ST4683	-22.7315	-1.68856	1.68856	0.331013	-21.0639	-1.48082	1.48082	0.0294021	-21.3074	-0.746404	0.746404	0.280786	-21.9481	3.14135	-3.14135	0.0111579	-22.1628	2.40012	-2.40012	0.0801914
SUT103	ST4687	-17.3355	-0.305744	0.305744	0.674069	-17.0108	-0.118996	0.118996	0.760725	-16.95	0.00582118	-0.00582118	1	-17.2233	0.41593	-0.41593	0.387597	-17.1235	0.303649	-0.303649	0.525292
SUT104	ST4695	-50.0161	0	0	1	-50.0161	0	0	1	-50.0161	0	0	1	-50.0161	0	0	1	-50.0161	0	0	1
SUT105	NA	-19.5806	-4.82041	4.82041	1.51762e-08	-17.2301	0.330679	-0.330679	0.391652	-17.0586	0.234083	-0.234083	0.545922	-19.6967	4.47419	-4.47419	5.51257e-10	-19.486	4.58375	-4.58375	5.57359e-11
SUT106	ST4726	-50.0161	0	0	1	-50.0161	0	0	1	-50.0161	0	0	1	-50.0161	0	0	1	-50.0161	0	0	1
SUT107	NA	-22.7414	-1.66878	1.66878	0.316119	-21.1963	-1.19488	1.19488	0.0592695	-21.5307	-0.279572	0.279572	0.778716	-22.0899	2.8576	-2.8576	0.0286031	-22.383	1.95963	-1.95963	0.255277
SUT108	NA	-23.6838	0.215894	-0.215894	0.679723	-23.9214	0.476112	-0.476112	1	-23.6245	0.128994	-0.128994	1	-23.8734	-0.709254	0.709254	1	-23.5345	-0.343347	0.343347	0.675348
SUT109	NA	-19.0912	-1.35447	1.35447	0.0551896	-18.4547	0.304863	-0.304863	0.495365	-18.147	-0.0641938	0.0641938	0.883809	-19.1933	1.0362	-1.0362	0.0742839	-18.8446	1.42164	-1.42164	0.0112882
SUT110	NA	-20.1249	-2.258	2.258	0.00605476	-18.9155	0.0467739	-0.0467739	0.909135	-19.0053	0.472944	-0.472944	0.272709	-20.0971	2.19942	-2.19942	0.00204712	-20.1531	1.77555	-1.77555	0.011005
SUT111	NA	-17.0592	-0.403156	0.403156	0.538145	-16.7654	0.0198897	-0.0198897	0.96184	-16.614	-0.0363213	0.0363213	0.927276	-17.0213	0.364705	-0.364705	0.444663	-16.8312	0.433185	-0.433185	0.330564
SUT112	NA	-22.6299	-1.89192	1.89192	0.244476	-21.6061	0.0494962	-0.0494962	1	-21.4333	-0.0493987	0.0493987	1	-22.602	1.83354	-1.83354	0.397582	-22.407	1.91168	-1.91168	0.261355
SUT113	NA	-21.5063	-2.13911	2.13911	0.0735709	-21.0188	1.36454	-1.36454	0.0349033	-20.717	1.00755	-1.00755	0.0546473	-22.1437	0.750094	-0.750094	0.597434	-21.7947	1.1363	-1.1363	0.400066
SUT114	NA	-19.6931	-3.12152	3.12152	0.00012509	-17.8927	-0.262071	0.262071	0.520471	-18.0257	0.250318	-0.250318	0.550075	-19.5096	3.37433	-3.37433	5.16036e-07	-19.6058	2.87023	-2.87023	1.69584e-05
SUT115	ST4827	-17.4	-0.262816	0.262816	0.717156	-17.0891	-0.146862	0.146862	0.704086	-17.0465	0.0145377	-0.0145377	0.983796	-17.2767	0.395358	-0.395358	0.409784	-17.1956	0.245692	-0.245692	0.625666
SUT116	NA	-18.6648	-0.65203	0.65203	0.346708	-18.0762	-0.32115	0.32115	0.457019	-18.0514	-0.124226	0.124226	0.768298	-18.4544	0.958796	-0.958796	0.0598749	-18.3929	0.769898	-0.769898	0.132609
SUT117	NA	-35.8703	-28.2915	28.2915	0.0176816	-21.4428	-0.381763	0.381763	0.666414	-21.456	-0.108194	0.108194	1	-35.6678	28.6965	-28.6965	0.0119756	-35.7139	28.6044	-28.6044	0.0442305
SUT118	NA	-19.772	-1.60766	1.60766	0.0361321	-18.6541	-0.393317	0.393317	0.349371	-18.5212	-0.412785	0.412785	0.303187	-19.5208	1.99588	-1.99588	0.00129549	-19.3487	2.02826	-2.02826	0.00105784
SUT119	NA	-18.0317	-0.669378	0.669378	0.300288	-17.6309	0.071608	-0.071608	0.865805	-17.4337	-0.0761241	0.0761241	0.854381	-18.02	0.578636	-0.578636	0.246354	-17.7839	0.738874	-0.738874	0.117947
SUT120	NA	-35.6474	-28.7374	28.7374	0.0342382	-20.997	-0.315353	0.315353	0.550066	-21.5131	0.962919	-0.962919	0.172605	-35.4611	29.1098	-29.1098	0.0035211	-36.0133	28.0056	-28.0056	0.0447101
SUT121	NA	-23.8772	0.602824	-0.602824	0.679723	-23.0622	-2.03275	2.03275	0.182195	-23.8063	-0.29774	0.29774	1	-22.8092	1.41903	-1.41903	0.743156	-23.5234	-0.32112	0.32112	0.675348
SUT122	NA	-19.8769	-1.39774	1.39774	0.0647774	-18.5526	-1.07746	1.07746	0.0125048	-18.8431	-0.249612	0.249612	0.58534	-19.2963	2.44486	-2.44486	9.69372e-05	-19.5515	1.62256	-1.62256	0.00991383
SUT123	NA	-21.9725	1.96335	-1.96335	0.0454233	-22.2778	-1.15341	1.15341	0.225213	-23.4144	1.36673	-1.36673	0.264687	-21.3512	-0.834869	0.834869	0.354629	-22.4473	-3.33897	3.33897	0.00268813
SUT124	NA	-50.0161	0	0	1	-50.0161	0	0	1	-50.0161	0	0	1	-50.0161	0	0	1	-50.0161	0	0	1
SUT125	NA	-21.8613	2.18574	-2.18574	0.0189383	-23.507	1.3049	-1.3049	0.536122	-22.3987	-0.664809	0.664809	0.56047	-22.4697	-3.51661	3.51661	0.0027526	-21.3243	-1.53777	1.53777	0.0879198
SUT126	NA	-21.0098	0.0379565	-0.0379565	1	-20.7635	-0.344191	0.344191	0.607699	-20.6172	-0.389747	0.389747	0.537933	-20.8005	0.266545	-0.266545	0.741327	-20.6043	0.347083	-0.347083	0.781028
SUT127	NA	-20.308	-1.89174	1.89174	0.0244476	-19.52	0.521544	-0.521544	0.264001	-19.1912	0.110515	-0.110515	0.842028	-20.521	1.35172	-1.35172	0.10154	-20.1536	1.77464	-1.77464	0.0131395
SUT128	ST4955	-18.1288	-1.2793	1.2793	0.0438806	-17.5753	0.393171	-0.393171	0.321902	-17.3017	0.0926439	-0.0926439	0.818838	-18.2741	0.874519	-0.874519	0.0813746	-17.9609	1.18915	-1.18915	0.0130127
SUT129	NA	-20.1912	-2.76917	2.76917	0.00131425	-18.6145	-0.178279	0.178279	0.727671	-18.9012	0.641858	-0.641858	0.139031	-20.0511	2.9353	-2.9353	6.25705e-05	-20.3052	2.11521	-2.11521	0.00626856
SUT130	ST4963	-19.0579	-1.63486	1.63486	0.019365	-18.4332	0.589244	-0.589244	0.154958	-18.2577	0.484895	-0.484895	0.240194	-19.3028	1.03095	-1.03095	0.0925416	-19.0926	1.13959	-1.13959	0.0451981
SUT131	NA	-20.38	-1.74772	1.74772	0.0442471	-19.5801	0.379326	-0.379326	0.472364	-19.8295	1.12434	-1.12434	0.0188632	-20.519	1.35571	-1.35571	0.10154	-20.7262	0.629434	-0.629434	0.577678
SUT132	NA	-19.5014	-0.534199	0.534199	0.493195	-18.7985	-0.675387	0.675387	0.12492	-19.2698	0.513934	-0.513934	0.264605	-19.1186	1.18549	-1.18549	0.0337481	-19.5557	-0.000453523	0.000453523	0.933866
SUT133	NA	-50.0161	0	0	1	-50.0161	0	0	1	-50.0161	0	0	1	-50.0161	0	0	1	-50.0161	0	0	1
SUT134	ST4996	-22.4218	-2.30802	2.30802	0.182421	-21.587	0.852909	-0.852909	0.291252	-20.9798	-0.114874	0.114874	1	-22.7971	1.44333	-1.44333	0.743156	-22.1474	2.43085	-2.43085	0.0801914
SUT135	NA	-37.4055	-25.2211	25.2211	1	-37.3507	25.3306	-25.3306	0.507681	-24.6274	0.130634	-0.130634	1	-50.0161	0	0	1	-37.3624	25.3074	-25.3074	1
SUT136	ST5002,ST5003	-36.61	-26.8122	26.8122	0.205111	-23.1274	0.0618679	-0.0618679	1	-23.0443	0.142347	-0.142347	1	-36.6215	26.789	-26.789	0.323241	-36.5728	26.8866	-26.8866	0.322673
SUT137	ST5017,ST5018	-19.9699	-1.59716	1.59716	0.051195	-19.0185	-0.0857378	0.0857378	0.839965	-18.9833	0.0904121	-0.0904121	0.86024	-19.876	1.67077	-1.67077	0.0168036	-19.8012	1.50854	-1.50854	0.021631
SUT138	ST5027	-19.3351	0.806244	-0.806244	0.16446	-19.8161	0.388484	-0.388484	0.485669	-19.4829	-0.0317223	0.0317223	0.962025	-19.4776	-1.20536	1.20536	0.0234191	-19.1006	-0.763194	0.763194	0.102661
SUT139	NA	-19.8392	-0.0723875	0.0723875	1	-19.1458	-1.12229	1.12229	0.0115653	-19.632	0.0969169	-0.0969169	0.87749	-19.2337	1.16921	-1.16921	0.0462579	-19.6868	-0.0487879	0.0487879	0.92885
SUT140	ST5039,ST5040	-18.2395	-1.16286	1.16286	0.076193	-17.669	0.229294	-0.229294	0.567539	-17.4892	0.116231	-0.116231	0.775453	-18.3047	0.918323	-0.918323	0.0685191	-18.0879	1.04014	-1.04014	0.032451
SUT141	NA	-18.6273	0.0113722	-0.0113722	0.914335	-17.9936	-1.10029	1.10029	0.00733717	-18.2696	-0.301384	0.301384	0.473582	-18.0351	1.05889	-1.05889	0.0293555	-18.2754	0.266375	-0.266375	0.637021
SUT142	NA	-20.7652	-2.45121	2.45121	0.0105438	-19.2338	-0.407054	0.407054	0.385571	-19.214	-0.199876	0.199876	0.657588	-20.5149	2.8378	-2.8378	0.000341614	-20.4582	2.63938	-2.63938	0.000977143
SUT143	NA	-20.6647	-0.652334	0.652334	0.517409	-20.4315	0.401935	-0.401935	0.537107	-20.5148	0.815144	-0.815144	0.114706	-20.817	0.233562	-0.233562	0.738426	-20.8549	-0.154117	0.154117	0.745478
SUT144	ST5068	-50.0161	0	0	1	-50.0161	0	0	1	-37.8512	-24.3298	24.3298	1	-50.0161	0	0	1	-37.8601	24.3118	-24.3118	1
SUT145	NA	-19.7876	-2.40651	2.40651	0.00212116	-18.3926	-0.153882	0.153882	0.699377	-18.3854	0.0782058	-0.0782058	0.864669	-19.6572	2.5531	-2.5531	0.000125909	-19.6098	2.33618	-2.33618	0.000346166
SUT146	NA	-21.4127	-2.32619	2.32619	0.0433041	-19.9059	-0.48129	0.48129	0.345667	-19.7275	-0.59144	0.59144	0.215545	-21.123	2.79157	-2.79157	0.00568192	-20.91	2.90554	-2.90554	0.00143908
SUT147	ST5077	-18.2434	-0.948851	0.948851	0.146025	-17.7297	0.131108	-0.131108	0.745195	-17.9001	0.71862	-0.71862	0.0742888	-18.2593	0.802873	-0.802873	0.111918	-18.3934	0.222947	-0.222947	0.70212
SUT148	NA	-20.2738	-0.989346	0.989346	0.24583	-20.1943	1.0468	-1.0468	0.0411942	-20.379	1.66277	-1.66277	0.000954124	-20.7463	-0.0698955	0.0698955	0.865859	-20.8869	-0.662952	0.662952	0.296535
SUT149	ST5096	-18.9897	-1.55745	1.55745	0.0255404	-18.1987	0.204901	-0.204901	0.625918	-17.9335	-0.0789598	0.0789598	0.841382	-19.0364	1.34992	-1.34992	0.0199446	-18.7349	1.64103	-1.64103	0.00273594
SUT150	ST5103	-50.0161	0	0	1	-37.5914	-24.8492	24.8492	1	-37.3461	-25.3399	25.3399	0.507742	-37.6247	24.7828	-24.7828	1	-37.3566	25.3188	-25.3188	1
SUT151	NA	-20.393	-0.36561	0.36561	0.696943	-20.0263	-0.15306	0.15306	0.830197	-20.0696	0.180174	-0.180174	0.73991	-20.2675	0.502404	-0.502404	0.448335	-20.2706	0.184328	-0.184328	0.906043
SUT152	ST5109	-36.4159	-27.2002	27.2002	0.221984	-22.4118	-0.600167	0.600167	0.824462	-22.6661	0.155307	-0.155307	1	-36.0913	27.8496	-27.8496	0.120799	-36.3901	27.252	-27.252	0.205719
SUT153	NA	-18.5308	-2.47535	2.47535	0.000332006	-17.065	-0.269376	0.269376	0.491535	-16.7186	-0.715478	0.715478	0.0605685	-18.3529	2.71695	-2.71695	4.04077e-07	-17.9675	3.17601	-3.17601	1.83434e-09
SUT154	ST5125	-21.0217	-1.10826	1.10826	0.284537	-19.8614	-1.02955	1.02955	0.0409868	-19.8518	-0.801843	0.801843	0.111635	-20.4611	2.11526	-2.11526	0.0116775	-20.4153	1.89498	-1.89498	0.0134953
SUT155	NA	-19.6151	-1.27756	1.27756	0.0933679	-19.158	0.584938	-0.584938	0.178995	-18.7807	0.0767874	-0.0767874	0.851634	-19.8535	0.686539	-0.686539	0.304486	-19.4381	1.20548	-1.20548	0.0445222
SUT156	ST5136	-19.1592	-0.33733	0.33733	0.703208	-18.833	-0.0969892	0.0969892	0.855991	-18.571	-0.374543	0.374543	0.367952	-19.0578	0.42603	-0.42603	0.531284	-18.7585	0.712746	-0.712746	0.217465
SUT157	ST5142	-18.5493	-2.23918	2.23918	0.000981789	-17.4123	0.16832	-0.16832	0.659909	-17.1461	-0.11748	0.11748	0.769806	-18.5854	2.05288	-2.05288	0.000119222	-18.2812	2.34942	-2.34942	7.67559e-06
SUT158	ST5148	-20.7511	-1.00563	1.00563	0.338747	-19.932	-0.402739	0.402739	0.411134	-20.0164	0.0122676	-0.0122676	1	-20.4946	1.40446	-1.40446	0.105516	-20.5423	0.997179	-0.997179	0.18547
SUT159	NA	-21.5001	-2.15143	2.15143	0.0778737	-19.9863	-0.710643	0.710643	0.215931	-20.0354	-0.365074	0.365074	0.523935	-21.1038	2.82981	-2.82981	0.00568192	-21.1205	2.48455	-2.48455	0.0149467
SUT160	ST5164	-22.9235	-1.3047	1.3047	0.563383	-21.8735	-0.545884	0.545884	0.475834	-22.1046	0.162328	-0.162328	1	-22.5904	1.85664	-1.85664	0.397582	-22.7886	1.14838	-1.14838	0.551865
SUT161	ST5165	-36.3438	-27.3445	27.3445	0.221984	-23.0779	1.05571	-1.05571	0.379381	-22.5618	0.269763	-0.269763	0.824605	-36.8407	26.3507	-26.3507	1	-36.364	27.3042	-27.3042	0.205719
SUT162	ST5171	-20.6073	0.402744	-0.402744	0.545794	-20.2983	-0.799251	0.799251	0.139055	-20.4785	-0.192366	0.192366	0.73979	-20.155	0.38761	-0.38761	0.716164	-20.2952	-0.204691	0.204691	0.706226
SUT163	ST5175	-24.4758	-2.98471	2.98471	0.695015	-23.9285	2.13772	-2.13772	0.14514	-22.7622	0.0513158	-0.0513158	1	-25.4854	0.851359	-0.851359	1	-24.282	2.94634	-2.94634	0.683754
SUT164	ST5176	-16.8266	-1.64603	1.64603	0.00656711	-15.9803	0.161386	-0.161386	0.668552	-15.512	-0.528587	0.528587	0.154087	-16.8588	1.46739	-1.46739	0.00102471	-16.3516	2.16994	-2.16994	8.93595e-07
SUT165	ST5179	-20.7261	0.640521	-0.640521	0.449205	-20.3553	-1.21348	1.21348	0.0345799	-20.6718	-0.333099	0.333099	0.652593	-20.0781	0.541344	-0.541344	0.561755	-20.3592	-0.33255	0.33255	0.602922
SUT166	ST5183	-19.7124	-2.55684	2.55684	0.000946558	-18.4239	0.196584	-0.196584	0.654409	-18.1235	-0.15783	0.15783	0.696019	-19.7597	2.34811	-2.34811	0.000528245	-19.4201	2.71545	-2.71545	2.46659e-05
SUT167	NA	-18.5503	-2.43637	2.43637	0.000442976	-17.5043	0.558696	-0.558696	0.151298	-17.4418	0.68022	-0.68022	0.0813059	-18.7785	1.86586	-1.86586	0.000802403	-18.6788	1.75329	-1.75329	0.00120417
SUT168	NA	-20.9812	-0.545266	0.545266	0.694114	-20.3442	-0.495285	0.495285	0.393552	-20.4554	-0.0264912	0.0264912	1	-20.6779	1.03782	-1.03782	0.18939	-20.7503	0.581098	-0.581098	0.573939
SUT169	NA	-18.5098	-2.73107	2.73107	8.27686e-05	-17.2119	0.357934	-0.357934	0.363578	-16.9101	0.00100803	-0.00100803	1	-18.637	2.36257	-2.36257	2.01973e-05	-18.2958	2.73324	-2.73324	2.46085e-07
SUT170	NA	-36.7559	-26.5204	26.5204	0.335543	-22.5664	-1.62695	1.62695	0.113063	-23.2995	0.0855908	-0.0855908	1	-35.912	28.2081	-28.2081	0.0451569	-36.6914	26.6494	-26.6494	0.322673
SUT171	NA	-21.3377	1.13857	-1.13857	0.205142	-21.4971	-0.593375	0.593375	0.452401	-21.4094	-0.52236	0.52236	0.433882	-20.9851	-0.547381	0.547381	0.554586	-20.8624	-0.613948	0.613948	0.409054
SUT172	ST5235	-22.5679	-2.01584	2.01584	0.180995	-21.6465	0.395888	-0.395888	0.63786	-21.2719	-0.106833	0.106833	0.901923	-22.7147	1.60812	-1.60812	0.552955	-22.3006	2.12437	-2.12437	0.193027
SUT173	NA	-19.3551	-1.27146	1.27146	0.0771217	-18.3133	-0.625248	0.625248	0.133974	-18.2456	-0.513719	0.513719	0.211248	-18.999	1.8696	-1.8696	0.00108209	-18.8935	1.76869	-1.76869	0.00132174
SUT174	NA	-21.8119	-0.35788	0.35788	0.839517	-21.6782	0.311044	-0.311044	0.74818	-22.25	1.7012	-1.7012	0.0277554	-21.9182	0.0312256	-0.0312256	1	-22.4483	-1.34098	1.34098	0.190738
SUT175	ST5245,ST5246	-18.9833	0.102669	-0.102669	0.819691	-18.7668	-0.307419	0.307419	0.465271	-18.554	-0.486594	0.486594	0.23685	-18.7749	0.200025	-0.200025	0.807066	-18.5234	0.39107	-0.39107	0.498296
SUT176	NA	-17.7615	-1.45371	1.45371	0.0206779	-17.0016	0.157719	-0.157719	0.68673	-16.6886	-0.22176	0.22176	0.559652	-17.7876	1.28741	-1.28741	0.00759467	-17.4359	1.67895	-1.67895	0.000268476
SUT177	NA	-18.4281	-1.3766	1.3766	0.0367849	-17.8107	0.371394	-0.371394	0.364892	-17.4999	-0.00374493	0.00374493	0.989053	-18.5608	0.997051	-0.997051	0.0671265	-18.2104	1.38606	-1.38606	0.0061271
SUT178	NA	-21.6692	0.186681	-0.186681	0.697979	-22.1124	0.943699	-0.943699	0.254955	-22.1713	1.3078	-1.3078	0.149997	-22.0843	-1.13107	1.13107	0.346937	-22.1105	-1.49545	1.49545	0.262417
SUT179	ST5276	-20.5208	-1.46608	1.46608	0.0983114	-19.8953	0.418394	-0.418394	0.385618	-19.7638	0.402086	-0.402086	0.407877	-20.6776	1.03833	-1.03833	0.18939	-20.5135	1.0547	-1.0547	0.158284
SUT180	NA	-23.3078	-0.535995	0.535995	1	-36.4661	27.0999	-27.0999	0.0387742	-23.2332	0.880134	-0.880134	0.77136	-36.7674	-26.4973	26.4973	0.333333	-23.5289	-0.33227	0.33227	0.675348
SUT181	NA	-19.0865	-0.334746	0.334746	0.67928	-18.9818	0.351863	-0.351863	0.455653	-18.8431	0.320951	-0.320951	0.456273	-19.2116	-0.02967	0.02967	0.937436	-19.0313	0.0191904	-0.0191904	0.949664
SUT182	NA	-19.9766	-2.02845	2.02845	0.0120944	-18.9121	0.108616	-0.108616	0.820269	-18.668	-0.132945	0.132945	0.772622	-19.982	1.90353	-1.90353	0.00513506	-19.6989	2.158	-2.158	0.00123009
SUT183	NA	-18.4581	-1.06552	1.06552	0.107251	-17.9605	0.277736	-0.277736	0.490867	-17.9027	0.408685	-0.408685	0.303574	-18.5481	0.771343	-0.771343	0.136919	-18.4524	0.650865	-0.650865	0.21306
SUT184	ST5305	-20.979	-3.19362	3.19362	0.00169757	-19.6245	0.697062	-0.697062	0.14503	-19.2654	0.225508	-0.225508	0.615887	-21.2805	2.47644	-2.47644	0.0246146	-20.877	2.97155	-2.97155	0.000916817
SUT185	ST5328	-50.0161	0	0	1	-50.0161	0	0	1	-50.0161	0	0	1	-50.0161	0	0	1	-50.0161	0	0	1
SUT186	NA	-19.9248	-0.383173	0.383173	0.710275	-19.7369	0.230547	-0.230547	0.667865	-19.6093	0.221934	-0.221934	0.64349	-19.9878	0.14304	-0.14304	0.907762	-19.8188	0.169069	-0.169069	0.925171
SUT187	NA	-17.0421	-1.4017	1.4017	0.0209397	-16.5384	0.605374	-0.605374	0.109487	-16.2216	0.218411	-0.218411	0.559945	-17.2953	0.78119	-0.78119	0.0901318	-16.9397	1.18047	-1.18047	0.00745426
SUT188	ST5332	-19.2323	-3.51708	3.51708	6.85623e-06	-17.6933	0.645345	-0.645345	0.102496	-17.1268	-0.241102	0.241102	0.535228	-19.5068	2.85397	-2.85397	1.19513e-05	-18.9014	3.75281	-3.75281	1.14277e-09
SUT189	NA	-17.0745	-0.662834	0.662834	0.280722	-16.8952	0.520928	-0.520928	0.175865	-16.6509	0.27875	-0.27875	0.464234	-17.2844	0.128923	-0.128923	0.840485	-17.0009	0.38392	-0.38392	0.397013
SUT190	ST5345	-17.9489	-0.91392	0.91392	0.15095	-17.232	-0.306441	0.306441	0.434857	-17.2453	-0.033362	0.033362	0.935313	-17.7454	1.20674	-1.20674	0.0113504	-17.7202	0.94529	-0.94529	0.0440986
SUT191	ST5351,ST5352	-21.8319	0.51219	-0.51219	0.527404	-21.664	-0.634133	0.634133	0.431652	-21.7064	-0.302699	0.302699	0.653208	-21.4672	0.103025	-0.103025	1	-21.4731	-0.220514	0.220514	0.836283
SUT192	ST5358	-22.8488	-1.45401	1.45401	0.426895	-21.5534	-0.965682	0.965682	0.237118	-21.5044	-0.816221	0.816221	0.351596	-22.3285	2.38048	-2.38048	0.10551	-22.2331	2.25948	-2.25948	0.142771
SUT193	NA	-17.8352	-0.627813	0.627813	0.330251	-17.3151	-0.206642	0.206642	0.60104	-17.1047	-0.38088	0.38088	0.318315	-17.6842	0.815844	-0.815844	0.088546	-17.4347	1.00289	-1.00289	0.0281164
SUT194	ST5360	-19.4751	-1.03147	1.03147	0.159601	-19.1187	0.53096	-0.53096	0.238214	-18.5734	-0.31302	0.31302	0.477135	-19.6916	0.484362	-0.484362	0.502907	-19.1038	1.34808	-1.34808	0.022903
SUT195	ST5364	-20.4088	0.309764	-0.309764	0.596971	-20.5097	0.114095	-0.114095	0.926417	-20.0878	-0.483162	0.483162	0.317424	-20.416	-0.43847	0.43847	0.466971	-19.9532	0.175343	-0.175343	0.919786
SUT196	NA	-22.2186	0.455492	-0.455492	0.800933	-22.1105	-0.468375	0.468375	0.846317	-22.1761	-0.0903842	0.0903842	1	-21.9342	-0.000874962	0.000874962	1	-21.9597	-0.363605	0.363605	0.787489
SUT197	ST5370	-36.2548	-27.5225	27.5225	0.135458	-22.9798	1.20108	-1.20108	0.428814	-22.1677	-0.176736	0.176736	0.855177	-36.8316	26.3689	-26.3689	0.564941	-36.0595	27.9131	-27.9131	0.0447101
SUT198	ST5380	-20.5562	-0.424446	0.424446	0.754754	-20.2963	0.109542	-0.109542	0.934436	-19.8677	-0.500815	0.500815	0.319349	-20.5647	0.293281	-0.293281	0.768325	-20.0945	0.922002	-0.922002	0.202003
SUT199	ST5384,ST5385	-21.6293	-0.723053	0.723053	0.729465	-20.7322	-0.856743	0.856743	0.152741	-20.5554	-0.963772	0.963772	0.0697838	-21.152	1.56357	-1.56357	0.141298	-20.9392	1.6774	-1.6774	0.0691251
SUT200	NA	-19.2828	2.05784	-2.05784	0.000376409	-19.8216	-0.788032	0.788032	0.12835	-19.7589	-0.66657	0.66657	0.157817	-18.8401	-1.28659	1.28659	0.0044889	-18.7452	-1.40871	1.40871	0.00191666
SUT201	ST5393,ST5394	-18.5677	-0.846268	0.846268	0.216997	-18.2248	0.381131	-0.381131	0.361572	-18.1854	0.548801	-0.548801	0.174894	-18.7068	0.454051	-0.454051	0.427341	-18.6292	0.297345	-0.297345	0.627312
SUT202	NA	-20.8173	-0.34709	0.34709	0.902177	-20.1849	-0.694507	0.694507	0.185695	-20.0161	-0.785824	0.785824	0.0997177	-20.4161	1.03529	-1.03529	0.202548	-20.2082	1.1393	-1.1393	0.159381
SUT203	NA	-18.6592	-1.04854	1.04854	0.122868	-17.9857	-0.100554	0.100554	0.831867	-17.8793	-0.0668668	0.0668668	0.874513	-18.5635	1.12575	-1.12575	0.0321837	-18.4178	1.10541	-1.10541	0.0300327
SUT204	ST5415	-17.9794	-0.773908	0.773908	0.239794	-17.4798	-0.012599	0.012599	0.975534	-17.069	-0.587622	0.587622	0.123068	-17.9239	0.770819	-0.770819	0.114194	-17.4736	1.35958	-1.35958	0.00303908
SUT205	NA	-18.7614	-1.13301	1.13301	0.104422	-18.0703	-0.0387546	0.0387546	0.928522	-18.027	0.121056	-0.121056	0.786963	-18.6941	1.15345	-1.15345	0.028473	-18.6114	1.00694	-1.00694	0.0517834
SUT206	NA	-19.4685	0.569944	-0.569944	0.30839	-19.4506	-0.39065	0.39065	0.405329	-19.351	-0.343249	0.343249	0.454753	-19.2206	-0.188442	0.188442	0.624808	-19.0841	-0.227228	0.227228	0.591425
SUT207	ST5455	-18.6236	-1.40848	1.40848	0.037166	-17.9581	0.293265	-0.293265	0.464867	-17.9337	0.491093	-0.491093	0.21858	-18.7184	1.10489	-1.10489	0.0363126	-18.6565	0.91672	-0.91672	0.0867796
SUT208	ST5467	-21.1637	1.81957	-1.81957	0.0214108	-22.4241	0.907733	-0.907733	0.262695	-22.4436	1.19332	-1.19332	0.255431	-21.5661	-2.73855	2.73855	0.000468339	-21.5583	-3.03479	3.03479	0.000787009
SUT209	NA	-18.7432	-1.49027	1.49027	0.0265435	-17.8528	-0.0860199	0.0860199	0.844933	-17.7456	-0.0537633	0.0537633	0.910162	-18.6517	1.55917	-1.55917	0.00395551	-18.5061	1.53847	-1.53847	0.00292489
SUT210	ST5501	-21.2287	-2.69432	2.69432	0.0121054	-19.8546	0.157961	-0.157961	0.795287	-19.5809	-0.142833	0.142833	0.802314	-21.2576	2.52225	-2.52225	0.0185619	-20.9457	2.83416	-2.83416	0.00209042
SUT211	NA	-50.0161	0	0	1	-36.2942	-27.4437	27.4437	0.0210465	-37.065	-25.9022	25.9022	0.261612	-36.3286	27.3749	-27.3749	0.192139	-37.0721	25.888	-25.888	1
SUT212	NA	-37.1171	-25.7979	25.7979	1	-23.8368	-0.538775	0.538775	0.701273	-24.8346	1.7033	-1.7033	0.636351	-36.827	26.3781	-26.3781	0.564941	-37.8601	24.3118	-24.3118	1
SUT213	ST5527,ST5528	-19.909	-0.993795	0.993795	0.226678	-19.1465	-0.32603	0.32603	0.487896	-19.3947	0.417008	-0.417008	0.370585	-19.6971	1.30336	-1.30336	0.0385611	-19.9096	0.566629	-0.566629	0.395805
SUT214	ST5528,ST5529	-20.3782	-0.780528	0.780528	0.413362	-20.4851	1.18924	-1.18924	0.0318188	-19.8264	0.118751	-0.118751	0.863113	-20.9284	-0.434058	0.434058	0.569879	-20.2311	0.648682	-0.648682	0.390232
SUT215	ST5549	-22.0574	-3.03679	3.03679	0.033078	-21.2102	1.58472	-1.58472	0.0155569	-20.3726	0.155644	-0.155644	0.81337	-22.793	1.45149	-1.45149	0.54135	-21.9147	2.89622	-2.89622	0.0142984
SUT216	NA	-35.0356	-29.9608	29.9608	0.000376941	-19.759	-0.414117	0.414117	0.424638	-19.4967	-0.691674	0.691674	0.135646	-34.8187	30.3948	-30.3948	4.04887e-05	-34.5955	30.8412	-30.8412	1.33451e-06
SUT217	ST5582	-20.5013	-0.534325	0.534325	0.619758	-20.3386	0.409083	-0.409083	0.447974	-20.2093	0.397151	-0.397151	0.431586	-20.6581	0.106555	-0.106555	1	-20.4902	0.130545	-0.130545	1
SUT218	NA	-18.3436	-0.375688	0.375688	0.605561	-18.015	-0.0636275	0.0636275	0.896446	-17.8996	-0.0480473	0.0480473	0.928832	-18.2598	0.429027	-0.429027	0.402436	-18.1048	0.427138	-0.427138	0.420181
SUT219	ST5618,ST5619	-18.0931	0.379405	-0.379405	0.422508	-17.971	-0.407699	0.407699	0.302658	-18.0381	-0.0270696	0.0270696	0.968909	-17.8387	0.0152976	-0.0152976	0.971399	-17.8668	-0.352877	0.352877	0.369468
SUT220	ST5620	-23.397	1.6423	-1.6423	0.371053	-24.6433	1.07407	-1.07407	1	-24.8346	1.7033	-1.7033	0.636351	-23.8808	-2.72409	2.72409	0.117339	-24.0335	-3.34139	3.34139	0.0400982
SUT221	ST5631	-17.819	-2.11278	2.11278	0.00111253	-16.5404	-0.246019	0.246019	0.521747	-16.5374	-0.00541082	0.00541082	0.988481	-17.6499	2.33679	-2.33679	1.94516e-06	-17.6078	2.10905	-2.10905	1.11214e-05
SUT222	ST5632,ST5633	-19.7393	-2.05837	2.05837	0.00856976	-18.5608	-0.101145	0.101145	0.854579	-18.2878	-0.400439	0.400439	0.340653	-19.6418	2.13918	-2.13918	0.000885209	-19.3308	2.4494	-2.4494	6.0624e-05
SUT223	ST5639,ST5640,ST5641	-19.8825	-0.216705	0.216705	0.823769	-19.5152	-0.311238	0.311238	0.516143	-19.6682	0.241401	-0.241401	0.634494	-19.6759	0.51581	-0.51581	0.502907	-19.7935	-0.0313615	0.0313615	0.924065
SUT224	NA	-22.0082	2.86477	-2.86477	0.00430194	-22.5052	-1.67118	1.67118	0.0795544	-23.159	-0.116642	0.116642	1	-21.1317	-1.22599	1.22599	0.205911	-21.7408	-2.75602	2.75602	0.00220388
SUT225	ST5642	-36.7649	-26.5023	26.5023	0.335543	-22.8798	-1.02597	1.02597	0.428814	-23.4871	0.434916	-0.434916	0.742407	-36.2236	27.585	-27.585	0.206438	-36.8666	26.2989	-26.2989	0.564576
SUT226	NA	-16.961	0.0291381	-0.0291381	0.874073	-16.5914	-0.567462	0.567462	0.132681	-16.6	-0.303785	0.303785	0.422073	-16.6305	0.517732	-0.517732	0.244171	-16.6	0.266848	-0.266848	0.55318
SUT227	ST5656	-21.4656	-0.220362	0.220362	0.867578	-21.5191	0.488118	-0.488118	0.376964	-21.3532	0.403707	-0.403707	0.537004	-21.6672	-0.297005	0.297005	0.788123	-21.4731	-0.220514	0.220514	0.836283
SUT228	NA	-16.8871	-0.207558	0.207558	0.79502	-16.8304	0.323588	-0.323588	0.402503	-16.8591	0.627504	-0.627504	0.0986227	-16.9955	-0.123365	0.123365	0.698301	-16.9845	-0.413347	0.413347	0.257783
SUT229	ST5661	-17.9506	-2.33149	2.33149	0.00040786	-16.7922	0.232222	-0.232222	0.546152	-16.6495	0.193396	-0.193396	0.612836	-18.0159	2.08679	-2.08679	2.89671e-05	-17.8341	2.13849	-2.13849	1.49248e-05
SUT230	ST5662	-19.4628	-1.05617	1.05617	0.162687	-18.9599	0.282007	-0.282007	0.560127	-18.7556	0.11984	-0.11984	0.806052	-19.5498	0.767986	-0.767986	0.22758	-19.3069	0.941908	-0.941908	0.120992
SUT231	ST5678	-20.7837	0.0304718	-0.0304718	0.900736	-20.3364	-0.707884	0.707884	0.179747	-20.2334	-0.667217	0.667217	0.200265	-20.3775	0.66774	-0.66774	0.430176	-20.2409	0.629195	-0.629195	0.445267
SUT232	NA	-19.2267	-1.0835	1.0835	0.143585	-18.8659	0.567932	-0.567932	0.190352	-18.552	0.186842	-0.186842	0.666492	-19.4628	0.497257	-0.497257	0.445356	-19.1111	0.888752	-0.888752	0.130356
SUT233	NA	-19.0827	-0.811249	0.811249	0.268274	-18.5202	-0.103762	0.103762	0.835063	-18.3175	-0.262469	0.262469	0.530371	-18.9814	0.899693	-0.899693	0.104029	-18.7407	1.06935	-1.06935	0.0527506
SUT234	NA	-22.7715	4.00607	-4.00607	0.00231344	-23.7505	-1.84139	1.84139	0.31819	-25.117	1.13849	-1.13849	1	-21.8058	-2.1888	2.1888	0.0233317	-23.1298	-5.14875	5.14875	4.91237e-05
SUT235	NA	-19.4634	-2.6102	2.6102	0.000626867	-18.2284	0.354682	-0.354682	0.388273	-18.2295	0.603518	-0.603518	0.138093	-19.5911	2.24054	-2.24054	0.000531967	-19.5534	2.00406	-2.00406	0.00175733
SUT236	ST5770,ST5771	-18.7746	0.0122123	-0.0122123	0.874034	-18.7375	0.132551	-0.132551	0.785861	-18.358	-0.380119	0.380119	0.352454	-18.7921	-0.16141	0.16141	0.703928	-18.3695	0.371823	-0.371823	0.506089
SUT237	NA	-19.7043	-1.40316	1.40316	0.0720576	-18.84	-0.103406	0.103406	0.82681	-18.7803	0.0237064	-0.0237064	1	-19.5994	1.49889	-1.49889	0.0226717	-19.5036	1.37858	-1.37858	0.0278141
SUT238	NA	-18.2047	-1.23235	1.23235	0.0575303	-17.7757	0.596023	-0.596023	0.137623	-17.5694	0.430039	-0.430039	0.27152	-18.4516	0.624566	-0.624566	0.231657	-18.2061	0.803702	-0.803702	0.113877
SUT239	NA	-19.8206	-1.51039	1.51039	0.0449797	-18.655	-0.61689	0.61689	0.147767	-18.7209	-0.238363	0.238363	0.591792	-19.4639	2.10966	-2.10966	0.000539398	-19.4936	1.7385	-1.7385	0.00477011
SUT240	NA	-17.5125	-1.41158	1.41158	0.0220854	-16.4259	-0.556626	0.556626	0.140289	-16.4543	-0.253397	0.253397	0.499788	-17.1859	1.95067	-1.95067	2.9917e-05	-17.1757	1.65918	-1.65918	0.00024318
SUT241	NA	-22.2344	0.487055	-0.487055	0.597509	-22.0397	-0.656218	0.656218	0.450198	-21.7629	-0.963263	0.963263	0.173476	-21.8552	0.157214	-0.157214	1	-21.54	0.475696	-0.475696	0.839832
SUT242	NA	-20.1075	0.877153	-0.877153	0.157402	-20.446	0.0146521	-0.0146521	1	-19.9918	-0.647329	0.647329	0.189061	-20.0615	-0.899245	0.899245	0.119524	-19.5737	-0.235619	0.235619	0.664948
SUT243	NA	-37.0973	-25.8374	25.8374	0.572849	-23.8422	-0.472877	0.472877	1	-24.3239	0.737604	-0.737604	1	-36.8407	26.3507	-26.3507	1	-37.3624	25.3074	-25.3074	1
SUT244	NA	-23.8871	0.62267	-0.62267	0.62031	-37.0543	25.9236	-25.9236	0.261521	-22.9818	-1.97454	1.97454	0.0574082	-36.7674	-26.4973	26.4973	0.333333	-22.6866	1.35234	-1.35234	0.551865
SUT245	ST5836,ST5837	-19.2736	-1.96061	1.96061	0.00694598	-18.3446	0.326004	-0.326004	0.440223	-18.2156	0.314524	-0.314524	0.432796	-19.3827	1.62819	-1.62819	0.00708029	-19.2149	1.65193	-1.65193	0.00504865
SUT246	ST5866	-20.4309	-4.2899	4.2899	3.94697e-06	-18.4042	0.44422	-0.44422	0.285132	-18.0572	-0.00324478	0.00324478	1	-20.6042	3.82905	-3.82905	6.68451e-06	-20.2193	4.2871	-4.2871	4.97133e-08
SUT247	ST5869	-19.1742	-0.463388	0.463388	0.567099	-18.6479	-0.37056	0.37056	0.38383	-18.6136	-0.192633	0.192633	0.653158	-18.937	0.823652	-0.823652	0.157285	-18.864	0.657808	-0.657808	0.26751
SUT248	NA	-20.9986	2.24643	-2.24643	0.00595616	-21.1884	-1.69553	1.69553	0.0122674	-21.0459	-1.73336	1.73336	0.00542132	-20.1093	-0.582052	0.582052	0.30055	-19.9362	-0.547668	0.547668	0.338346
SUT249	NA	-36.1215	-27.7892	27.7892	0.0552824	-21.847	-0.533571	0.533571	0.603226	-21.7845	-0.412085	0.412085	0.638278	-35.8313	28.3695	-28.3695	0.0504403	-35.8087	28.4147	-28.4147	0.0655284
SUT250	ST5889,ST5890	-19.36	-1.03079	1.03079	0.159056	-18.9513	0.409529	-0.409529	0.357272	-18.6478	0.0492878	-0.0492878	0.931692	-19.5203	0.595973	-0.595973	0.390443	-19.1791	0.966477	-0.966477	0.105984
SUT251	ST5893,ST5894	-17.8883	-1.11654	1.11654	0.0733554	-17.2826	0.111497	-0.111497	0.776891	-17.1488	0.0905473	-0.0905473	0.819496	-17.895	0.98898	-0.98898	0.043141	-17.7236	1.01979	-1.01979	0.0298282
SUT252	ST5896	-20.0271	-1.48265	1.48265	0.0753288	-19.0029	-0.35808	0.35808	0.425195	-19.1117	0.106175	-0.106175	0.84957	-19.802	1.8187	-1.8187	0.00788183	-19.8723	1.36635	-1.36635	0.0425255
SUT253	NA	-18.0131	-1.95541	1.95541	0.00259171	-16.773	-0.314986	0.314986	0.408736	-16.7421	-0.130312	0.130312	0.734129	-17.8066	2.25434	-2.25434	5.09698e-06	-17.7367	2.08225	-2.08225	1.58432e-05
SUT254	ST5901,ST5902	-20.17	-2.8117	2.8117	0.00128411	-18.8929	0.464549	-0.464549	0.300743	-18.7467	0.418668	-0.418668	0.318664	-20.3543	2.32897	-2.32897	0.00369653	-20.171	2.38354	-2.38354	0.00122951
SUT255	ST5905	-18.0526	-2.70651	2.70651	5.84133e-05	-16.6665	0.147163	-0.147163	0.700317	-16.4797	0.0202575	-0.0202575	0.961215	-18.076	2.54554	-2.54554	9.83876e-07	-17.8507	2.68435	-2.68435	1.26575e-07
SUT256	NA	-18.659	-1.83359	1.83359	0.0074422	-17.8232	0.377797	-0.377797	0.340496	-17.9094	0.796562	-0.796562	0.0453612	-18.7972	1.44315	-1.44315	0.00721225	-18.8455	1.03461	-1.03461	0.0621057
SUT257	ST5912,ST5913	-19.4353	-3.11117	3.11117	7.51689e-05	-18.0937	0.639569	-0.639569	0.117012	-17.9247	0.548169	-0.548169	0.167695	-19.707	2.45359	-2.45359	0.000265124	-19.4981	2.55959	-2.55959	5.66113e-05
SUT258	NA	-20.2053	0.428964	-0.428964	0.501127	-20.7105	0.774953	-0.774953	0.16421	-20.1606	-0.0781412	0.0781412	0.945194	-20.5468	-1.22598	1.22598	0.0702659	-19.9644	-0.373018	0.373018	0.595283
SUT259	NA	-50.0161	0	0	1	-50.0161	0	0	1	-50.0161	0	0	1	-50.0161	0	0	1	-50.0161	0	0	1
SUT260	NA	-20.2291	-2.04964	2.04964	0.0129409	-19.1622	0.122509	-0.122509	0.792877	-19.1738	0.392372	-0.392372	0.38634	-20.2434	1.90681	-1.90681	0.0110128	-20.2163	1.64918	-1.64918	0.0255812
SUT261	ST5931,ST5932	-19.4759	-1.28102	1.28102	0.0991752	-18.8933	0.331326	-0.331326	0.456527	-18.9802	0.751549	-0.751549	0.0840277	-19.5928	0.933081	-0.933081	0.145988	-19.6408	0.525096	-0.525096	0.413567
SUT262	NA	-23.3898	-0.371932	0.371932	1	-22.7201	-0.752696	0.752696	0.469772	-22.2198	-1.50669	1.50669	0.0513428	-22.9664	1.10469	-1.10469	1	-22.4294	1.86686	-1.86686	0.255277
SUT263	NA	-20.4901	-1.52764	1.52764	0.102274	-19.4457	-0.332886	0.332886	0.46684	-19.4635	-0.0509191	0.0509191	0.925493	-20.2724	1.84883	-1.84883	0.0126711	-20.253	1.57585	-1.57585	0.0292453
SUT264	NA	-20.8988	0.64595	-0.64595	0.401525	-20.9405	-0.36936	0.36936	0.648955	-20.7384	-0.526636	0.526636	0.454128	-20.672	-0.306559	0.306559	0.622432	-20.4249	-0.124154	0.124154	0.692561
SUT265	ST5965	-18.5976	0.53935	-0.53935	0.295583	-18.6958	-0.140018	0.140018	0.764755	-18.6336	-0.0176489	0.0176489	1	-18.4807	-0.41983	0.41983	0.352739	-18.3786	-0.52738	0.52738	0.214116
SUT266	NA	-21.0793	0.176974	-0.176974	0.764256	-20.7877	-0.536523	0.536523	0.34032	-20.9965	0.127527	-0.127527	1	-20.7598	0.348049	-0.348049	0.872315	-20.9324	-0.30911	0.30911	0.620493
SUT267	NA	-20.9508	-2.08015	2.08015	0.0412562	-19.6867	-0.271368	0.271368	0.598246	-19.8297	0.261729	-0.261729	0.567868	-20.7793	2.30894	-2.30894	0.00671923	-20.8782	1.79924	-1.79924	0.035529
SUT268	NA	-20.7812	-3.5893	3.5893	0.000260233	-19.1337	0.511303	-0.511303	0.268615	-19.1474	0.785087	-0.785087	0.0736606	-20.9863	3.06482	-3.06482	0.000983629	-20.9615	2.80253	-2.80253	0.00263036
SUT269	ST5975	-50.0161	0	0	1	-50.0161	0	0	1	-50.0161	0	0	1	-50.0161	0	0	1	-50.0161	0	0	1
SUT270	NA	-19.5748	-2.38728	2.38728	0.00169792	-18.0811	-0.406097	0.406097	0.321896	-18.2789	0.236331	-0.236331	0.572593	-19.3259	2.77099	-2.77099	7.16641e-06	-19.4875	2.1359	-2.1359	0.000801065
SUT271	ST5989	-20.9263	-0.655191	0.655191	0.531395	-20.6348	0.292928	-0.292928	0.693515	-20.4709	0.21156	-0.21156	0.73979	-21.0212	0.351234	-0.351234	0.719881	-20.8161	0.449502	-0.449502	0.769002
SUT272	ST5993	-34.5946	-30.843	30.843	3.55235e-06	-19.6892	1.2336	-1.2336	0.0119774	-18.9647	0.0313036	-0.0313036	0.972406	-35.1986	29.6348	-29.6348	0.00284521	-34.51	31.012	-31.012	3.46082e-07
SUT273	ST6001	-35.5387	-28.9548	28.9548	0.0202953	-20.4284	-1.06475	1.06475	0.0571889	-20.3485	-0.977706	0.977706	0.0651871	-34.9846	30.0629	-30.0629	0.000466225	-34.9537	30.1246	-30.1246	3.6038e-05
SUT274	ST6003	-23.5175	-0.116714	0.116714	1	-23.0979	-0.511908	0.511908	0.771234	-22.9423	-0.576512	0.576512	0.615986	-23.2139	0.609695	-0.609695	1	-23.0218	0.681954	-0.681954	1
SUT275	ST6004	-20.7861	0.420584	-0.420584	0.614739	-21.153	0.485231	-0.485231	0.385765	-21.433	1.29256	-1.29256	0.0478948	-20.986	-0.934473	0.934473	0.164964	-21.2329	-1.74014	1.74014	0.0207534
SUT276	NA	-22.6705	-1.81062	1.81062	0.244476	-21.5056	-0.317246	0.317246	0.769275	-21.5379	-0.00566374	0.00566374	1	-22.4672	2.10302	-2.10302	0.203051	-22.4559	1.81389	-1.81389	0.341679
SUT277	NA	-18.8745	-2.48371	2.48371	0.000400077	-17.5639	0.0766334	-0.0766334	0.845758	-17.5511	0.297531	-0.297531	0.453539	-18.8624	2.3938	-2.3938	2.61263e-05	-18.8111	2.1845	-2.1845	0.000102327
SUT278	NA	-19.8485	-0.810756	0.810756	0.309907	-19.2903	-0.0840944	0.0840944	0.886097	-19.1559	-0.10648	0.10648	0.845135	-19.7513	0.890966	-0.890966	0.222425	-19.5795	0.922683	-0.922683	0.172862
SUT279	NA	-19.1873	-4.1332	4.1332	1.91918e-07	-17.1105	0.194529	-0.194529	0.604768	-17.0332	0.286454	-0.286454	0.463807	-19.2332	3.92716	-3.92716	1.84463e-09	-19.1185	3.8448	-3.8448	1.81372e-09
SUT280	NA	-16.9767	0.59145	-0.59145	0.2101	-17.1195	-0.0947599	0.0947599	0.808506	-17.2215	0.355931	-0.355931	0.357165	-16.8801	-0.512409	0.512409	0.170894	-16.9434	-0.950871	0.950871	0.0115745
SUT281	NA	-19.9979	-1.98588	1.98588	0.014205	-18.7674	-0.260541	0.260541	0.554741	-18.5601	-0.428597	0.428597	0.304357	-19.8166	2.23429	-2.23429	0.00116356	-19.5706	2.41444	-2.41444	0.00018059
SUT282	NA	-19.6721	-3.16355	3.16355	8.93632e-05	-18.1697	0.389012	-0.389012	0.340004	-17.9557	0.207495	-0.207495	0.618134	-19.8116	2.7705	-2.7705	4.32342e-05	-19.5597	2.96236	-2.96236	7.79852e-06
SUT283	NA	-50.0161	0	0	1	-37.0943	-25.8435	25.8435	0.507681	-37.8426	-24.3469	24.3469	1	-37.1267	25.7787	-25.7787	1	-37.8543	24.3236	-24.3236	1
SUT284	ST6125	-35.648	-28.7361	28.7361	0.0248723	-21.317	0.264366	-0.264366	0.786789	-21.2388	0.355045	-0.355045	0.550709	-35.7676	28.4969	-28.4969	0.0187993	-35.7277	28.5766	-28.5766	0.0442305
SUT285	NA	-17.8273	-2.32714	2.32714	0.000331751	-17.0054	0.908963	-0.908963	0.0183331	-16.7887	0.722184	-0.722184	0.0582815	-18.2294	1.40869	-1.40869	0.00536975	-17.9735	1.60878	-1.60878	0.00101612
SUT286	ST6142	-35.8771	-28.2779	28.2779	0.0176816	-22.1257	0.963786	-0.963786	0.254955	-21.5277	0.0147798	-0.0147798	1	-36.3415	27.349	-27.349	0.192139	-35.7825	28.4671	-28.4671	0.0655284
SUT287	NA	-22.8319	-1.48781	1.48781	0.426895	-21.7806	-0.400855	0.400855	0.735889	-21.8314	-0.0527668	0.0527668	0.875626	-22.5827	1.87215	-1.87215	0.397582	-22.602	1.52166	-1.52166	0.282362
SUT288	ST6169	-19.6492	0.321736	-0.321736	0.577481	-19.6325	-0.12744	0.12744	0.773227	-19.6165	0.087062	-0.087062	0.918687	-19.5335	-0.2045	0.2045	0.702861	-19.4785	-0.406337	0.406337	0.448796
SUT289	ST6170	-20.3615	-1.78476	1.78476	0.0388282	-19.5154	0.323228	-0.323228	0.554575	-19.5287	0.596199	-0.596199	0.209959	-20.4694	1.45487	-1.45487	0.085857	-20.4448	1.19214	-1.19214	0.149221
SUT290	NA	-22.4013	-0.348919	0.348919	1	-21.9844	-0.258668	0.258668	0.855027	-21.6251	-0.730968	0.730968	0.257786	-22.2187	0.60008	-0.60008	1	-21.824	1.0776	-1.0776	0.400066
SUT291	NA	-50.0161	0	0	1	-37.5982	-24.8358	24.8358	1	-36.8525	-26.3271	26.3271	0.136699	-37.6294	24.7732	-24.7732	1	-36.8611	26.3099	-26.3099	0.564576
SUT292	NA	-19.4259	1.70014	-1.70014	0.00285007	-19.7093	-0.904515	0.904515	0.0498402	-19.623	-0.830703	0.830703	0.0694757	-18.9221	-0.806716	0.806716	0.0980325	-18.7954	-0.865162	0.865162	0.0626582
SUT293	NA	-20.9681	-0.571476	0.571476	0.608275	-20.356	-0.46616	0.46616	0.447974	-20.1412	-0.648912	0.648912	0.204178	-20.6925	1.00854	-1.00854	0.18939	-20.4456	1.19057	-1.19057	0.128625
SUT294	NA	-36.4851	-27.0619	27.0619	0.221984	-22.5223	-0.66451	0.66451	0.644428	-23.7036	1.94509	-1.94509	0.209452	-36.1331	27.7658	-27.7658	0.120799	-37.3566	25.3188	-25.3188	1
SUT295	NA	-17.5959	-2.0765	2.0765	0.00112678	-16.5936	0.281847	-0.281847	0.459245	-16.3108	-0.0371697	0.0371697	0.925918	-17.6876	1.77883	-1.77883	0.000194274	-17.3659	2.11043	-2.11043	6.96968e-06
SUT296	NA	-21.5916	0.031488	-0.031488	1	-20.8303	-1.34607	1.34607	0.0225157	-21.2992	-0.16145	0.16145	0.901923	-20.8715	1.29442	-1.29442	0.133244	-21.3006	0.124371	-0.124371	1
SUT297	NA	-35.9041	-28.2239	28.2239	0.0262834	-20.8486	-1.67163	1.67163	0.00515659	-21.4004	-0.321466	0.321466	0.690874	-35.0458	29.9406	-29.9406	0.000782432	-35.6356	28.761	-28.761	0.0319564
SUT298	NA	-21.893	-1.36556	1.36556	0.294112	-21.5429	0.853321	-0.853321	0.312188	-22.3251	2.66462	-2.66462	0.00108479	-22.2807	0.476178	-0.476178	1	-23.0234	-1.32112	1.32112	0.420671
SUT299	NA	-19.732	-0.768853	0.768853	0.314056	-19.3626	0.236567	-0.236567	0.622046	-19.1106	-0.0206601	0.0206601	0.969745	-19.7997	0.519152	-0.519152	0.542695	-19.5146	0.777508	-0.777508	0.238645
SUT300	NA	-20.0329	-1.91598	1.91598	0.0167894	-18.9496	-0.0614157	0.0614157	0.938463	-18.99	0.266181	-0.266181	0.552444	-19.9587	1.95007	-1.95007	0.00349906	-19.963	1.62975	-1.62975	0.0176822
SUT301	NA	-35.45	-29.1322	29.1322	0.00814382	-20.9329	0.311893	-0.311893	0.648955	-20.5867	-0.133929	0.133929	0.796742	-35.5843	28.8634	-28.8634	0.00784961	-35.284	29.4641	-29.4641	0.00132198
SUT302	ST6256	-18.1394	-1.05894	1.05894	0.103844	-17.7234	0.43764	-0.43764	0.285372	-17.4922	0.221755	-0.221755	0.575926	-18.3107	0.602344	-0.602344	0.232636	-18.0386	0.834655	-0.834655	0.0867377
SUT303	NA	-19.9372	-0.633304	0.633304	0.506811	-19.9458	0.91678	-0.91678	0.0980966	-20.0735	1.41812	-1.41812	0.00442779	-20.3391	-0.28456	0.28456	0.679527	-20.4205	-0.759251	0.759251	0.21146
SUT304	NA	-21.2648	-0.622008	0.622008	0.556005	-20.5444	-0.617932	0.617932	0.307353	-20.5322	-0.395588	0.395588	0.505879	-20.9078	1.22188	-1.22188	0.163058	-20.8602	1.00519	-1.00519	0.262867
SUT305	NA	-20.8607	-0.786328	0.786328	0.414526	-19.8439	-1.06457	1.06457	0.0323292	-19.735	-1.0354	1.0354	0.0317543	-20.285	1.82372	-1.82372	0.0191859	-20.1412	1.79936	-1.79936	0.0116516
SUT306	NA	-20.9159	-1.31991	1.31991	0.183734	-19.8102	-0.658667	0.658667	0.180739	-19.6566	-0.719627	0.719627	0.107375	-20.5294	1.97858	-1.97858	0.00982418	-20.3406	2.04438	-2.04438	0.0103412
SUT307	NA	-20.9312	-2.11928	2.11928	0.0438757	-19.5095	-0.498708	0.498708	0.305996	-19.6253	-0.0206667	0.0206667	1	-20.6264	2.61469	-2.61469	0.00144124	-20.7072	2.14128	-2.14128	0.0181414
SUT308	NA	-21.4879	-1.0058	1.0058	0.439161	-20.8585	-0.0383936	0.0383936	1	-20.7315	-0.0459588	0.0459588	1	-21.42	1.02757	-1.02757	0.435174	-21.2589	1.03786	-1.03786	0.25269
SUT309	ST6294,ST6295	-21.4489	0.916178	-0.916178	0.265529	-21.3515	-0.884392	0.884392	0.171995	-21.3115	-0.718131	0.718131	0.264292	-20.9554	-0.0433315	0.0433315	1	-20.8721	-0.188539	0.188539	0.745478
SUT310	ST6300,ST6301	-19.8711	-0.490525	0.490525	0.618416	-20.0584	1.06496	-1.06496	0.0368234	-19.6512	0.497326	-0.497326	0.305204	-20.357	-0.595382	0.595382	0.30824	-19.9148	-0.0228821	0.0228821	1
SUT311	NA	-21.044	-1.06362	1.06362	0.386405	-20.9466	1.08493	-1.08493	0.0602703	-20.5455	0.529412	-0.529412	0.306203	-21.5342	-0.0309603	0.0309603	0.821124	-21.0927	0.540283	-0.540283	0.739833
SUT312	NA	-21.0339	-1.91396	1.91396	0.0422416	-20.3203	0.673283	-0.673283	0.189455	-19.4239	-0.87263	0.87263	0.0554785	-21.3268	1.21389	-1.21389	0.350571	-20.3913	2.77314	-2.77314	0.000396075
SUT313	ST6349	-37.3953	-25.2415	25.2415	1	-23.2632	-2.81609	2.81609	0.0366819	-23.32	-2.45552	2.45552	0.0848039	-35.9674	28.0974	-28.0974	0.0726459	-36.0643	27.9034	-27.9034	0.0447101
SUT314	NA	-20.19	0.147303	-0.147303	0.783122	-19.991	-0.371606	0.371606	0.527024	-20.0881	0.069632	-0.069632	0.895302	-19.9625	0.193601	-0.193601	0.819524	-20.0253	-0.243876	0.243876	0.662406
SUT315	NA	-17.0056	1.13859	-1.13859	0.0208076	-17.1277	-0.701748	0.701748	0.0700206	-17.1305	-0.44936	0.44936	0.245269	-16.6106	-0.462853	0.462853	0.210583	-16.574	-0.701503	0.701503	0.0564175
SUT316	ST6363	-19.4657	-1.05032	1.05032	0.162687	-19.0835	0.496227	-0.496227	0.243255	-18.9278	0.431381	-0.431381	0.307877	-19.6621	0.543327	-0.543327	0.449268	-19.4665	0.622775	-0.622775	0.331642
SUT317	NA	-21.4764	-0.198868	0.198868	1	-21.191	-0.167705	0.167705	1	-20.8636	-0.575673	0.575673	0.323524	-21.3428	0.351855	-0.351855	1	-20.9844	0.756919	-0.756919	0.370446
SUT318	ST6365	-37.1268	-25.7785	25.7785	1	-37.068	25.8962	-25.8962	0.507681	-24.8415	1.68955	-1.68955	0.636351	-50.0161	0	0	1	-37.8601	24.3118	-24.3118	1
SUT319	NA	-20.658	-0.665713	0.665713	0.458703	-19.9522	-0.561697	0.561697	0.280577	-19.9518	-0.315468	0.315468	0.543767	-20.3378	1.19188	-1.19188	0.122371	-20.3024	0.950811	-0.950811	0.165976
SUT320	NA	-20.9932	0.00462434	-0.00462434	1	-20.3053	-1.16112	1.16112	0.0224052	-20.6716	-0.181999	0.181999	0.78721	-20.3605	1.14647	-1.14647	0.143019	-20.69	0.175763	-0.175763	0.885853
SUT321	ST6403	-21.5751	1.99857	-1.99857	0.0396425	-21.7932	-1.37217	1.37217	0.102945	-22.849	0.986512	-0.986512	0.353709	-20.8428	-0.648145	0.648145	0.362013	-21.8647	-3.00387	3.00387	0.00088692
SUT322	NA	-19.8751	-1.40138	1.40138	0.0716465	-18.8547	-0.427937	0.427937	0.325262	-18.8737	-0.143396	0.143396	0.7434	-19.6108	1.81598	-1.81598	0.00390733	-19.5941	1.53749	-1.53749	0.0165482
SUT323	ST6454	-20.767	-1.6177	1.6177	0.0782154	-19.5839	-0.554605	0.554605	0.264035	-19.4972	-0.481203	0.481203	0.301505	-20.4437	2.14999	-2.14999	0.00936845	-20.3217	2.08231	-2.08231	0.00713113
SUT324	NA	-36.3278	-27.3765	27.3765	0.135458	-22.2591	-0.535038	0.535038	0.534163	-21.8057	-1.19555	1.19555	0.0943329	-36.0376	27.957	-27.957	0.0726459	-35.6231	28.7859	-28.7859	0.0214401
SUT325	NA	-19.5441	-2.89344	2.89344	0.000271741	-18.0445	0.115168	-0.115168	0.791244	-17.9092	0.0910729	-0.0910729	0.829867	-19.5502	2.76725	-2.76725	2.7326e-05	-19.3757	2.80437	-2.80437	1.05076e-05
SUT326	ST6485,ST6486	-18.0907	-0.711663	0.711663	0.27596	-17.6699	0.076532	-0.076532	0.862329	-17.4024	-0.211766	0.211766	0.598406	-18.0805	0.617919	-0.617919	0.216986	-17.7744	0.918284	-0.918284	0.0530394
SUT327	ST6497,ST6498	-19.8689	-1.0739	1.0739	0.174937	-19.2907	0.107548	-0.107548	0.81351	-19.0152	-0.196628	0.196628	0.668225	-19.8768	0.943994	-0.943994	0.163326	-19.5658	1.25417	-1.25417	0.0496502
SUT328	ST6502	-17.7495	-1.00879	1.00879	0.106478	-17.3457	0.412315	-0.412315	0.289004	-16.9783	-0.0758085	0.0758085	0.846029	-17.9072	0.579198	-0.579198	0.23558	-17.5001	1.08163	-1.08163	0.0176321
SUT329	ST6510	-20.1291	-0.249541	0.249541	0.866028	-19.9476	0.0774123	-0.0774123	0.891352	-19.9367	0.30253	-0.30253	0.543767	-20.1251	0.14344	-0.14344	0.902545	-20.0769	-0.071935	0.071935	0.912095
SUT330	ST6518,ST6519	-18.501	-0.639901	0.639901	0.345383	-18.0657	-0.0262632	0.0262632	0.964226	-17.9521	-0.00680292	0.00680292	1	-18.4389	0.649942	-0.649942	0.215991	-18.2879	0.640005	-0.640005	0.198308
SUT331	ST6527	-20.6315	0.451157	-0.451157	0.545794	-21.3267	1.12022	-1.12022	0.0633133	-20.6204	-0.0453691	0.0453691	1	-21.1457	-1.59379	1.59379	0.0326411	-20.4124	-0.439104	0.439104	0.509698
SUT332	ST6531	-22.1709	-2.80973	2.80973	0.0576069	-20.8719	0.452194	-0.452194	0.507396	-20.8458	0.646253	-0.646253	0.270509	-22.3392	2.35899	-2.35899	0.14872	-22.2743	2.177	-2.177	0.142771
SUT333	ST6534,ST6535	-19.9185	-0.670753	0.670753	0.427863	-19.7645	0.595826	-0.595826	0.249283	-19.6576	0.628302	-0.628302	0.175382	-20.1637	0.0661526	-0.0661526	1	-20.0165	0.0488252	-0.0488252	1
SUT334	ST6537	-18.3572	-0.437121	0.437121	0.527515	-17.8924	-0.299709	0.299709	0.460615	-17.7175	-0.402967	0.402967	0.314856	-18.1633	0.710957	-0.710957	0.151114	-17.9485	0.828703	-0.828703	0.086994
SUT335	ST6569,ST6570	-18.8648	-1.08212	1.08212	0.117047	-18.3311	0.212168	-0.212168	0.615935	-18.1837	0.163925	-0.163925	0.685143	-18.9248	0.847999	-0.847999	0.145301	-18.7388	0.908159	-0.908159	0.0968463
SUT336	ST6572	-17.012	-0.308777	0.308777	0.654027	-16.9271	0.358512	-0.358512	0.350561	-16.824	0.398816	-0.398816	0.299669	-17.14	-0.0613806	0.0613806	0.814856	-16.9981	-0.0892992	0.0892992	0.779443
SUT337	ST6581	-35.8302	-28.3718	28.3718	0.012201	-20.9338	-1.23525	1.23525	0.0602703	-21.0239	-0.808003	0.808003	0.209395	-35.1938	29.6446	-29.6446	0.00415315	-35.3291	29.3739	-29.3739	0.00270927
SUT338	ST6582	-19.524	0.540159	-0.540159	0.358773	-19.5142	-0.354102	0.354102	0.484699	-19.3202	-0.495479	0.495479	0.286402	-19.2993	-0.204953	0.204953	0.672271	-19.0639	-0.0459787	0.0459787	0.845241
SUT339	NA	-17.5593	-0.688192	0.688192	0.277279	-17.1025	-0.00359862	0.00359862	1	-17.104	0.245932	-0.245932	0.526763	-17.5052	0.68222	-0.68222	0.147926	-17.4682	0.444443	-0.444443	0.347049
SUT340	NA	-24.1752	1.19872	-1.19872	0.62031	-23.7686	-1.80513	1.80513	0.31819	-24.3147	-0.466216	0.466216	1	-23.2227	0.592109	-0.592109	1	-23.7342	-0.742686	0.742686	0.612956
SUT341	ST6611	-19.2365	-0.503719	0.503719	0.522345	-19.1489	0.536622	-0.536622	0.209122	-18.9114	0.308281	-0.308281	0.481972	-19.4529	-0.0431905	0.0431905	0.787146	-19.1819	0.186818	-0.186818	0.840679
SUT342	NA	-18.6195	-0.993787	0.993787	0.145369	-18.0416	0.0641575	-0.0641575	0.894731	-17.5429	-0.686839	0.686839	0.0766688	-18.5993	0.920022	-0.920022	0.0716262	-18.0604	1.68597	-1.68597	0.000663376
SUT343	ST6616	-20.5068	0.201743	-0.201743	0.738346	-20.2831	-0.424521	0.424521	0.457962	-20.0111	-0.722136	0.722136	0.129285	-20.2397	0.218201	-0.218201	0.897815	-19.9343	0.517209	-0.517209	0.44482
SUT344	NA	-18.1849	-0.781722	0.781722	0.232858	-17.7909	0.193439	-0.193439	0.626006	-17.5209	-0.0999178	0.0999178	0.802551	-18.2341	0.56936	-0.56936	0.267561	-17.9263	0.873022	-0.873022	0.0685022
SUT345	ST6621	-36.511	-27.0101	27.0101	0.205111	-23.236	0.688591	-0.688591	0.771234	-22.2087	-1.11961	1.11961	0.149997	-36.8316	26.3689	-26.3689	0.564941	-35.8459	28.3402	-28.3402	0.0985698
SUT346	ST6623	-22.8715	-1.40866	1.40866	0.426895	-21.7083	-0.722754	0.722754	0.333012	-21.3682	-1.15601	1.15601	0.0849966	-22.4672	2.10302	-2.10302	0.203051	-22.0893	2.5471	-2.5471	0.0625699
SUT347	NA	-21.6589	-0.663858	0.663858	0.729465	-21.0783	-0.285087	0.285087	0.710998	-20.7887	-0.617619	0.617619	0.296039	-21.4659	0.935819	-0.935819	0.402172	-21.1412	1.27335	-1.27335	0.229797
SUT348	NA	-18.8745	-0.4838	0.4838	0.527469	-18.789	0.515902	-0.515902	0.237546	-18.6589	0.502314	-0.502314	0.229111	-19.0839	-0.0491233	0.0491233	0.940727	-18.9168	-0.0268952	0.0268952	0.90504
SUT349	NA	-19.9599	-4.06185	4.06185	2.44075e-06	-17.6688	-0.325536	0.325536	0.42596	-17.703	-0.0105496	0.0105496	0.987545	-19.7516	4.36433	-4.36433	1.92866e-09	-19.7482	4.05937	-4.05937	9.02157e-09
SUT350	NA	-15.0668	-0.475111	0.475111	0.436252	-14.9976	0.540589	-0.540589	0.142292	-14.4771	-0.253817	0.253817	0.489636	-15.2896	-0.084745	0.084745	0.76458	-14.7298	0.723158	-0.723158	0.0716011
SUT351	NA	-20.4983	-4.15503	4.15503	8.38316e-06	-18.9207	1.19746	-1.19746	0.00686487	-18.064	-0.269285	0.269285	0.502606	-21.0539	2.92962	-2.92962	0.00195285	-20.1565	4.41256	-4.41256	1.31625e-08
SUT352	ST6635	-18.4862	-1.13219	1.13219	0.089769	-17.9423	0.252129	-0.252129	0.536596	-17.5466	-0.292716	0.292716	0.455149	-18.564	0.862327	-0.862327	0.103268	-18.129	1.42043	-1.42043	0.0039111
SUT353	NA	-20.8689	0.20096	-0.20096	0.788676	-20.7027	-0.303357	0.303357	0.607699	-20.8837	0.30504	-0.30504	0.686121	-20.6613	0.100206	-0.100206	1	-20.8056	-0.500225	0.500225	0.515779
SUT354	NA	-23.6932	0.234782	-0.234782	0.679723	-22.4252	-2.54298	2.54298	0.00362468	-23.4579	-0.231144	0.231144	1	-22.3706	2.29631	-2.29631	0.14872	-23.3647	-0.0038651	0.0038651	1
SUT355	NA	-18.5551	-2.22756	2.22756	0.000988285	-17.314	-0.04973	0.04973	0.912432	-17.2075	-0.0160948	0.0160948	0.972964	-18.4829	2.25793	-2.25793	2.8563e-05	-18.3376	2.23674	-2.23674	2.2787e-05
SUT356	ST6694	-19.789	-1.57361	1.57361	0.0347103	-18.8055	-0.192177	0.192177	0.694883	-18.9148	0.273062	-0.273062	0.521263	-19.644	1.74957	-1.74957	0.00641045	-19.714	1.29769	-1.29769	0.0568072
SUT357	NA	-19.5621	0.468477	-0.468477	0.41751	-19.7058	0.0496575	-0.0496575	0.951919	-19.527	-0.0616103	0.0616103	0.921753	-19.5316	-0.521536	0.521536	0.280935	-19.3136	-0.397494	0.397494	0.39461
SUT358	NA	-19.2125	-0.551732	0.551732	0.470267	-18.787	-0.0745883	0.0745883	0.888146	-18.721	0.0397633	-0.0397633	0.952182	-19.1224	0.617698	-0.617698	0.292008	-19.0166	0.517491	-0.517491	0.375617
SUT359	ST6723	-20.7761	-5.59935	5.59935	2.03128e-07	-18.3042	0.875263	-0.875263	0.0355522	-17.7368	-0.0129811	0.0129811	0.987192	-21.1634	4.71059	-4.71059	4.9355e-06	-20.5554	5.61489	-5.61489	1.51946e-10
SUT360	NA	-22.5322	2.55671	-2.55671	0.0340569	-23.9346	0.475932	-0.475932	1	-23.2431	-0.660719	0.660719	0.77136	-22.7171	-3.04055	3.04055	0.0256836	-21.9811	-1.88047	1.88047	0.0388207
SUT361	ST6728	-20.1283	-1.72514	1.72514	0.0375867	-19.0463	-0.24818	0.24818	0.622273	-19.167	0.239923	-0.239923	0.611231	-19.9582	1.95117	-1.95117	0.00423224	-20.0446	1.46646	-1.46646	0.0365886
SUT362	NA	-19.3316	0.296207	-0.296207	0.564504	-19.5426	0.341691	-0.341691	0.516143	-19.3191	0.141267	-0.141267	0.795682	-19.4546	-0.656277	0.656277	0.218084	-19.1879	-0.43487	0.43487	0.381818
SUT363	NA	-22.2737	1.39574	-1.39574	0.255626	-23.2172	0.700473	-0.700473	0.771234	-22.5371	-0.413001	0.413001	0.668697	-22.5783	-2.11918	2.11918	0.14667	-21.8602	-0.994737	0.994737	0.296416
SUT364	NA	-37.4156	-25.2009	25.2009	1	-37.3578	25.3166	-25.3166	0.507681	-23.9593	-1.23401	1.23401	0.47741	-50.0161	0	0	1	-36.6914	26.6494	-26.6494	0.322673
SUT365	NA	-20.5772	-1.99712	1.99712	0.0252072	-19.7429	0.53982	-0.53982	0.249283	-19.3421	-0.0151815	0.0151815	0.965395	-20.7971	1.44325	-1.44325	0.110428	-20.3633	1.9991	-1.9991	0.0125022
SUT366	ST6759,ST6760	-16.5439	0.174063	-0.174063	0.659798	-16.6448	0.234676	-0.234676	0.537393	-16.2949	-0.218576	0.218576	0.564757	-16.6125	-0.42547	0.42547	0.238287	-16.224	0.0396574	-0.0396574	1
SUT367	NA	-20.5098	1.03796	-1.03796	0.165705	-20.5746	-0.722074	0.722074	0.258997	-20.4428	-0.738607	0.738607	0.157303	-20.1022	-0.336937	0.336937	0.605618	-19.9392	-0.322605	0.322605	0.674482
SUT368	NA	-20.533	-2.08558	2.08558	0.0163388	-20.2422	1.7298	-1.7298	0.000929448	-19.8229	1.13751	-1.13751	0.016884	-21.3428	0.351855	-0.351855	1	-20.8871	0.951362	-0.951362	0.256791
SUT369	ST6795	-20.0504	-1.43611	1.43611	0.08111	-19.3301	0.191433	-0.191433	0.663315	-19.1787	0.135274	-0.135274	0.75098	-20.0984	1.22594	-1.22594	0.083877	-19.9091	1.29269	-1.29269	0.0642832
SUT370	NA	-21.2804	-0.590762	0.590762	0.650372	-20.07	-1.61538	1.61538	0.0015398	-20.4417	-0.625539	0.625539	0.234989	-20.4214	2.19472	-2.19472	0.00610294	-20.76	1.20563	-1.20563	0.165282
SUT371	NA	-21.5057	-2.14023	2.14023	0.0735709	-20.7401	0.864628	-0.864628	0.152741	-20.5346	0.699607	-0.699607	0.242353	-21.8779	1.28172	-1.28172	0.257165	-21.6373	1.45095	-1.45095	0.215117
SUT372	ST6818	-18.2366	-0.503508	0.503508	0.476207	-18.0795	0.430413	-0.430413	0.291112	-17.8909	0.299664	-0.299664	0.457183	-18.3948	0.0728643	-0.0728643	0.9603	-18.1672	0.21629	-0.21629	0.708918
SUT373	ST6826	-20.4474	0.913121	-0.913121	0.174649	-20.3567	-0.871986	0.871986	0.0920246	-20.7439	0.148979	-0.148979	0.848146	-19.9597	-0.0519196	0.0519196	0.817535	-20.3082	-1.06068	1.06068	0.108578
SUT374	NA	-17.6339	-1.54387	1.54387	0.0139708	-16.7492	-0.0166748	0.0166748	0.969795	-16.6718	0.0751322	-0.0751322	0.849434	-17.5773	1.54299	-1.54299	0.00121189	-17.4605	1.46484	-1.46484	0.00151764
SUT375	NA	-20.333	-1.84179	1.84179	0.0315839	-19.5227	0.426264	-0.426264	0.360138	-19.7096	1.04678	-1.04678	0.0240232	-20.4943	1.40501	-1.40501	0.10154	-20.6456	0.790569	-0.790569	0.362155
SUT376	NA	-36.8847	-26.2627	26.2627	0.335543	-22.8185	-1.67568	1.67568	0.159823	-22.819	-1.42761	1.42761	0.263084	-36.0334	27.9652	-27.9652	0.0726459	-36.0692	27.8938	-27.8938	0.0447101
SUT377	ST6846	-18.1971	0.53032	-0.53032	0.28346	-18.074	-0.553917	0.553917	0.165944	-18.0507	-0.354071	0.354071	0.377844	-17.8685	0.0127	-0.0127	0.970816	-17.8048	-0.171678	0.171678	0.637265
SUT378	NA	-36.7376	-26.557	26.557	0.335543	-22.6891	-1.32958	1.32958	0.224327	-22.9565	-0.547964	0.547964	0.615986	-36.0498	27.9325	-27.9325	0.120799	-36.3588	27.3145	-27.3145	0.205719
SUT379	ST6913	-17.9918	-0.524167	0.524167	0.431966	-17.8351	0.421705	-0.421705	0.290537	-17.6905	0.379001	-0.379001	0.337965	-18.1526	0.0883702	-0.0883702	0.930945	-17.9711	0.139602	-0.139602	0.841112
SUT380	ST6914	-34.4882	-31.0557	31.0557	1.32756e-06	-18.9986	0.293106	-0.293106	0.523892	-18.6078	-0.241922	0.241922	0.576842	-34.613	30.806	-30.806	2.71706e-06	-34.2607	31.5107	-31.5107	1.95747e-08
SUT381	NA	-21.747	-1.65756	1.65756	0.149676	-20.8663	0.103646	-0.103646	1	-20.5288	-0.32484	0.32484	0.556308	-21.7514	1.53467	-1.53467	0.194954	-21.3735	1.97854	-1.97854	0.0676451
SUT382	NA	-23.0915	-0.968696	0.968696	0.755494	-22.4463	-0.113503	0.113503	1	-22.428	0.0965956	-0.0965956	1	-22.9833	1.07079	-1.07079	1	-22.934	0.857709	-0.857709	0.742558
SUT383	NA	-35.7817	-28.4686	28.4686	0.0613889	-21.3881	-0.101941	0.101941	1	-21.1694	-0.292743	0.292743	0.720646	-35.7121	28.6079	-28.6079	0.0187993	-35.5249	28.9824	-28.9824	0.014625
SUT384	NA	-22.3886	0.795473	-0.795473	0.411419	-22.1502	-1.05895	1.05895	0.329333	-21.9242	-1.26437	1.26437	0.0794202	-21.8057	0.256254	-0.256254	1	-21.5442	0.467258	-0.467258	0.839832
SUT385	ST6939	-37.1073	-25.8176	25.8176	1	-23.3324	-1.52009	1.52009	0.209224	-24.8191	1.70002	-1.70002	0.636351	-36.3286	27.3749	-27.3749	0.192139	-37.8543	24.3236	-24.3236	1
SUT386	ST6941	-19.3091	-1.61447	1.61447	0.0271515	-18.2678	-0.279637	0.279637	0.525372	-18.3599	0.151258	-0.151258	0.72141	-19.1238	1.8711	-1.8711	0.0018919	-19.1802	1.44641	-1.44641	0.0149008
SUT387	ST6947	-37.4156	-25.2009	25.2009	1	-37.3578	25.3166	-25.3166	0.507681	-25.1313	1.10998	-1.10998	1	-50.0161	0	0	1	-37.8601	24.3118	-24.3118	1
SUT388	NA	-17.4751	-3.28258	3.28258	1.01728e-06	-15.889	0.320677	-0.320677	0.389088	-15.8994	0.587981	-0.587981	0.115909	-17.5861	2.94634	-2.94634	6.23185e-09	-17.5574	2.69187	-2.69187	3.97606e-08
SUT389	ST6975	-21.4074	0.83318	-0.83318	0.368391	-20.98	-1.50334	1.50334	0.0153685	-21.3291	-0.558084	0.558084	0.466114	-20.6124	0.642786	-0.642786	0.558967	-20.9283	-0.300953	0.300953	0.620493
SUT390	NA	-20.7111	-0.114799	0.114799	1	-20.2764	-0.561799	0.561799	0.326697	-20.232	-0.403666	0.403666	0.431586	-20.383	0.656835	-0.656835	0.425478	-20.3094	0.492095	-0.492095	0.570845
SUT391	ST6981	-19.3557	-1.03925	1.03925	0.159056	-18.8585	0.259977	-0.259977	0.559122	-18.9511	0.691716	-0.691716	0.109488	-19.4352	0.766204	-0.766204	0.255974	-19.4914	0.341901	-0.341901	0.643386
SUT392	ST6985	-22.4102	-2.33117	2.33117	0.190619	-20.8504	-0.614504	0.614504	0.390207	-20.7925	-0.483082	0.483082	0.507375	-22.0618	2.91391	-2.91391	0.0303891	-21.9665	2.79255	-2.79255	0.0265497
SUT393	NA	-19.2982	1.70343	-1.70343	0.00349096	-19.9243	-0.259753	0.259753	0.635288	-19.6533	-0.554974	0.554974	0.25893	-19.1257	-1.47253	1.47253	0.00244836	-18.8162	-1.16533	1.16533	0.0133422
SUT394	ST6987	-20.7675	0.383363	-0.383363	0.520685	-21.6066	1.52039	-1.52039	0.0439437	-20.8682	0.289997	-0.289997	0.686121	-21.4749	-1.91234	1.91234	0.0300045	-20.6943	-0.663009	0.663009	0.277357
SUT395	NA	-19.5861	-2.36473	2.36473	0.00202115	-18.3223	0.0425756	-0.0425756	0.936933	-18.0867	-0.182039	0.182039	0.660008	-19.5574	2.30806	-2.30806	0.000354955	-19.2865	2.53796	-2.53796	2.56983e-05
SUT396	ST7027	-22.9764	-1.19886	1.19886	0.563383	-22.4089	0.303286	-0.303286	1	-21.8915	-0.485215	0.485215	0.520532	-23.0756	0.886311	-0.886311	1	-22.5193	1.68697	-1.68697	0.456405
SUT397	ST7042	-20.0067	-1.13829	1.13829	0.163745	-19.331	-0.0235621	0.0235621	1	-19.4167	0.394539	-0.394539	0.338577	-19.9508	1.13581	-1.13581	0.109824	-19.9941	0.737418	-0.737418	0.3351
SUT398	NA	-22.6642	0.176859	-0.176859	1	-21.8994	-1.51196	1.51196	0.0858874	-22.2378	-0.588141	0.588141	0.583316	-21.857	1.3235	-1.3235	0.343527	-22.1676	0.390481	-0.390481	1
SUT399	NA	-35.3881	-29.2559	29.2559	0.00688484	-20.7291	0.138292	-0.138292	0.835213	-20.2997	-0.473707	0.473707	0.413804	-35.4375	29.157	-29.157	0.00233634	-35.0492	29.9336	-29.9336	0.000153482
SUT400	ST7059	-20.9273	0.317743	-0.317743	0.57635	-20.721	-0.493742	0.493742	0.403874	-20.7571	-0.175304	0.175304	0.776693	-20.6248	0.173174	-0.173174	1	-20.6231	-0.135311	0.135311	0.773148
SUT401	NA	-36.8943	-26.2434	26.2434	0.572849	-24.4183	1.49694	-1.49694	0.393772	-24.1196	1.14629	-1.14629	0.701377	-37.6247	24.7828	-24.7828	1	-37.3624	25.3074	-25.3074	1
SUT402	ST7073	-20.0861	-0.979463	0.979463	0.260346	-19.2062	-0.576361	0.576361	0.207264	-19.0377	-0.666815	0.666815	0.122946	-19.7488	1.53983	-1.53983	0.0206416	-19.5417	1.64215	-1.64215	0.00862621
SUT403	NA	-21.1241	-1.73346	1.73346	0.0815057	-19.5023	-1.30094	1.30094	0.00543036	-19.9035	-0.251944	0.251944	0.59358	-20.4239	3.01976	-3.01976	0.000112314	-20.7969	1.96192	-1.96192	0.0160498
SUT404	ST7081,ST7082	-22.3319	-0.48781	0.48781	1	-21.4364	-1.0894	1.0894	0.124436	-21.724	-0.267596	0.267596	0.759544	-21.7409	1.5556	-1.5556	0.144557	-21.9865	0.75253	-0.75253	0.637798
SUT405	ST7084	-20.3546	0.201414	-0.201414	0.758373	-20.1818	-0.324746	0.324746	0.53172	-19.9316	-0.578767	0.578767	0.222435	-20.1389	0.115798	-0.115798	1	-19.8534	0.374938	-0.374938	0.640797
SUT406	NA	-18.8297	-0.445025	0.445025	0.563498	-18.5858	0.179354	-0.179354	0.687712	-18.431	0.116204	-0.116204	0.822226	-18.8677	0.25504	-0.25504	0.701841	-18.6761	0.326338	-0.326338	0.553395
SUT407	ST7092	-50.0161	0	0	1	-50.0161	0	0	1	-50.0161	0	0	1	-50.0161	0	0	1	-50.0161	0	0	1
SUT408	ST7106	-22.81	-1.53158	1.53158	0.316119	-22.1634	0.429611	-0.429611	0.560087	-21.9098	0.169466	-0.169466	0.86958	-22.9791	1.07921	-1.07921	1	-22.6866	1.35234	-1.35234	0.551865
SUT409	ST7107,ST7108	-18.2731	0.441709	-0.441709	0.382121	-17.9874	-0.810448	0.810448	0.044839	-18.1669	-0.204782	0.204782	0.627166	-17.8216	0.347203	-0.347203	0.474069	-17.9616	-0.244719	0.244719	0.530183
SUT410	NA	-37.9117	-24.2087	24.2087	1	-25.4371	-0.51351	0.51351	1	-37.7933	24.4455	-24.4455	1	-37.6294	24.7732	-24.7732	1	-50.0161	0	0	1
SUT411	ST7113	-35.7534	-28.5253	28.5253	0.0675844	-21.4843	0.212123	-0.212123	0.880916	-21.9003	1.29056	-1.29056	0.0794202	-35.8352	28.3617	-28.3617	0.0504403	-36.2859	27.4602	-27.4602	0.205719
SUT412	NA	-18.3007	-1.26251	1.26251	0.0522575	-17.5625	-0.00757797	0.00757797	0.987094	-17.6029	0.319776	-0.319776	0.412201	-18.2492	1.25144	-1.25144	0.0132884	-18.2501	0.937633	-0.937633	0.0606665
SUT413	NA	-22.6977	0.243762	-0.243762	1	-23.1356	0.863664	-0.863664	0.771234	-22.6955	0.229704	-0.229704	1	-23.0783	-1.11918	1.11918	0.421203	-22.6052	-0.484732	0.484732	0.773883
SUT414	NA	-21.2113	-0.728941	0.728941	0.583802	-20.3912	-0.734844	0.734844	0.203859	-20.8374	0.404692	-0.404692	0.496289	-20.8051	1.42728	-1.42728	0.110428	-21.2167	0.292181	-0.292181	0.862685
SUT415	ST7146	-21.6528	-1.84597	1.84597	0.100135	-20.7588	0.26449	-0.26449	0.677189	-20.5616	0.116716	-0.116716	0.9316	-21.7329	1.5716	-1.5716	0.194954	-21.5025	1.72067	-1.72067	0.138923
SUT416	ST7152	-20.0508	-1.43539	1.43539	0.0901828	-19.3777	0.296569	-0.296569	0.518693	-18.9239	-0.364476	0.364476	0.39812	-20.1511	1.12067	-1.12067	0.116415	-19.6583	1.79429	-1.79429	0.00714574
SUT417	ST7154,ST7155,ST7156	-16.9316	-0.148614	0.148614	0.888516	-16.5883	-0.343341	0.343341	0.369263	-16.5175	-0.238274	0.238274	0.53133	-16.7144	0.46896	-0.46896	0.291691	-16.605	0.375971	-0.375971	0.390115
SUT418	ST7156	-35.9041	-28.2239	28.2239	0.0262834	-22.1343	0.899784	-0.899784	0.329333	-21.4943	-0.133542	0.133542	0.890503	-36.3329	27.3662	-27.3662	0.192139	-35.7321	28.5679	-28.5679	0.0442305
SUT419	ST7157	-36.0035	28.0252	-28.0252	0.0164903	-50.0161	0	0	1	-37.8512	-24.3298	24.3298	1	-35.9749	-28.0823	28.0823	0.0145198	-23.741	-3.92635	3.92635	0.0144319
SUT420	NA	-18.8131	-2.60653	2.60653	0.000213212	-17.5129	0.212161	-0.212161	0.594585	-17.31	0.0529544	-0.0529544	0.894203	-18.8711	2.37636	-2.37636	3.30531e-05	-18.6295	2.54771	-2.54771	3.82799e-06
SUT421	NA	-17.8991	-0.638267	0.638267	0.318823	-17.2786	-0.39594	0.39594	0.308988	-17.3787	0.0508974	-0.0508974	0.909223	-17.6527	1.01697	-1.01697	0.0312864	-17.7145	0.581588	-0.581588	0.225506
SUT422	NA	-21.5403	-2.07107	2.07107	0.109352	-20.5732	0.365087	-0.365087	0.635533	-20.6245	0.713919	-0.713919	0.184061	-21.672	1.69344	-1.69344	0.151138	-21.6762	1.37325	-1.37325	0.348064
SUT423	ST7228	-21.1738	-0.160147	0.160147	1	-20.8666	-0.238671	0.238671	0.658927	-21.0617	0.398082	-0.398082	0.508127	-21.0077	0.378296	-0.378296	0.719881	-21.1562	-0.2307	0.2307	0.708794
SUT424	ST7228	-19.842	-0.297755	0.297755	0.773653	-19.4341	-0.324386	0.324386	0.507836	-19.4281	-0.0894765	0.0894765	0.85505	-19.6361	0.595349	-0.595349	0.359764	-19.5959	0.363978	-0.363978	0.572141
SUT425	ST7236	-20.6858	-1.13619	1.13619	0.264495	-20.6689	1.33642	-1.33642	0.0250196	-19.794	-0.167082	0.167082	0.732041	-21.3025	-0.21134	0.21134	0.829747	-20.3848	1.31224	-1.31224	0.111672
SUT426	NA	-21.4141	2.32049	-2.32049	0.00802933	-22.0399	-0.878748	0.878748	0.358312	-22.0202	-0.671106	0.671106	0.499483	-20.9295	-1.46529	1.46529	0.050828	-20.872	-1.66228	1.66228	0.0200339
SUT427	ST7255	-22.6364	-1.87876	1.87876	0.244476	-22.2166	1.25072	-1.25072	0.169148	-21.5644	0.19294	-0.19294	0.890503	-23.2139	0.609695	-0.609695	1	-22.5239	1.67784	-1.67784	0.456405
SUT428	NA	-17.3383	-0.300011	0.300011	0.684387	-17.2259	0.284429	-0.284429	0.460476	-17.0187	0.116504	-0.116504	0.764636	-17.4308	0.000959189	-0.000959189	0.932956	-17.1854	0.179862	-0.179862	0.728626
SUT429	ST7266	-21.4515	-1.07863	1.07863	0.374856	-20.5661	-0.509752	0.509752	0.453249	-20.9677	0.540495	-0.540495	0.404719	-21.155	1.55753	-1.55753	0.141298	-21.523	0.509651	-0.509651	0.696571
SUT430	ST7268	-16.8447	-0.117306	0.117306	0.929385	-16.8026	0.246163	-0.246163	0.518436	-16.6206	0.128713	-0.128713	0.736801	-16.9178	-0.142898	0.142898	0.665588	-16.6971	-0.0133664	0.0133664	0.903086
SUT431	NA	-20.5158	-0.950014	0.950014	0.287979	-20.1272	0.397467	-0.397467	0.452319	-19.398	-0.814566	0.814566	0.0630978	-20.661	0.545465	-0.545465	0.649995	-19.8939	1.76792	-1.76792	0.0087031
SUT432	NA	-19.2618	-0.132142	0.132142	0.916739	-19.2154	0.248027	-0.248027	0.586563	-18.9442	-0.0477841	0.0477841	0.918066	-19.3356	-0.129629	0.129629	0.797106	-19.0289	0.171907	-0.171907	0.804669
SUT433	NA	-18.3396	-1.82859	1.82859	0.00566291	-17.7176	0.807081	-0.807081	0.0417954	-17.2653	0.148894	-0.148894	0.706787	-18.6897	1.01413	-1.01413	0.0618203	-18.1999	1.68201	-1.68201	0.000814099
SUT434	ST0003	-18.2483	-1.60796	1.60796	0.013101	-17.5598	0.440239	-0.440239	0.269781	-17.3103	0.18777	-0.18777	0.628903	-18.4224	1.14564	-1.14564	0.023893	-18.131	1.41645	-1.41645	0.0039111
SUT435	ST0004	-18.2813	-1.30139	1.30139	0.0432349	-17.464	-0.12212	0.12212	0.761667	-17.2733	-0.256964	0.256964	0.508589	-18.1723	1.40513	-1.40513	0.00502871	-17.941	1.5559	-1.5559	0.00128353
SUT436	ST0045	-37.0973	-25.8374	25.8374	0.572849	-24.1256	0.0939864	-0.0939864	1	-24.8207	1.73114	-1.73114	0.636351	-37.1267	25.7787	-25.7787	1	-37.8601	24.3118	-24.3118	1
SUT437	NA	-37.9011	-24.2298	24.2298	1	-37.8477	24.3368	-24.3368	1	-25.1243	-0.863165	0.863165	1	-50.0161	0	0	1	-37.3624	25.3074	-25.3074	1
SUT438	ST0072	-17.4291	-0.52813	0.52813	0.421352	-16.9807	-0.153301	0.153301	0.69085	-16.8893	-0.0894252	0.0894252	0.811948	-17.302	0.668204	-0.668204	0.149201	-17.1718	0.616645	-0.616645	0.165039
SUT439	ST0082	-20.2021	0.422569	-0.422569	0.501127	-19.6657	-1.29022	1.29022	0.00671113	-19.7895	-0.795865	0.795865	0.0973261	-19.5094	0.848731	-0.848731	0.180282	-19.5964	0.362891	-0.362891	0.624508
SUT440	ST0083	-17.7081	-0.506072	0.506072	0.443816	-17.1997	-0.30088	0.30088	0.436905	-17.2193	-0.0152477	0.0152477	0.972731	-17.508	0.792034	-0.792034	0.0902827	-17.4896	0.517063	-0.517063	0.257293
SUT441	NA	-20.0714	-1.8388	1.8388	0.0249696	-19.4337	0.767521	-0.767521	0.0860721	-19.3345	0.815703	-0.815703	0.0671786	-20.4049	1.05777	-1.05777	0.202548	-20.2716	1.01241	-1.01241	0.169375
SUT442	NA	-21.5741	-4.00339	4.00339	0.000608471	-19.4211	-0.0800613	0.0800613	0.918468	-19.3098	-0.0561831	0.0561831	0.897569	-21.481	4.07552	-4.07552	7.6233e-05	-21.3338	4.05794	-4.05794	6.23376e-05
SUT443	NA	-19.7169	-1.37805	1.37805	0.0697966	-19.0208	0.199492	-0.199492	0.687675	-18.9607	0.325827	-0.325827	0.466637	-19.7673	1.1631	-1.1631	0.0679436	-19.6693	1.0472	-1.0472	0.10454
SUT444	NA	-21.2021	-1.57743	1.57743	0.111851	-20.5002	0.378785	-0.378785	0.464405	-20.2936	0.212297	-0.212297	0.710943	-21.3399	1.18781	-1.18781	0.350571	-21.098	1.35967	-1.35967	0.186412
SUT445	ST0120	-17.6585	-2.0208	2.0208	0.00139108	-16.5962	0.108636	-0.108636	0.777937	-16.2971	-0.243006	0.243006	0.519655	-17.6631	1.8976	-1.8976	7.68539e-05	-17.325	2.26178	-2.26178	1.78537e-06
SUT446	NA	-20.5487	-0.884225	0.884225	0.326259	-20.1689	0.343631	-0.343631	0.485985	-19.8282	-0.091198	0.091198	0.907816	-20.6671	0.533425	-0.533425	0.649995	-20.2908	0.974135	-0.974135	0.165976
SUT447	NA	-20.6784	-0.624866	0.624866	0.517409	-20.2959	0.0600739	-0.0600739	0.934436	-20.3239	0.362766	-0.362766	0.495686	-20.661	0.545465	-0.545465	0.649995	-20.6516	0.252412	-0.252412	0.887375
SUT448	NA	-19.0511	-0.709515	0.709515	0.307543	-18.856	0.531943	-0.531943	0.232657	-18.341	-0.251551	0.251551	0.539775	-19.2692	0.159255	-0.159255	0.872898	-18.713	0.959784	-0.959784	0.0710925
SUT449	NA	-18.8664	-2.01797	2.01797	0.00406527	-17.7205	-0.0762961	0.0762961	0.871825	-17.5473	-0.176034	0.176034	0.661562	-18.7821	2.07247	-2.07247	0.000232894	-18.5706	2.18361	-2.18361	5.27691e-05
SUT450	NA	-50.0161	0	0	1	-50.0161	0	0	1	-50.0161	0	0	1	-50.0161	0	0	1	-50.0161	0	0	1
SUT451	NA	-19.281	-0.974993	0.974993	0.190773	-18.6738	-0.0442649	0.0442649	0.973924	-18.4367	-0.271708	0.271708	0.516984	-19.212	0.998789	-0.998789	0.0919313	-18.9393	1.23232	-1.23232	0.0239186
SUT452	NA	-17.7666	-0.699512	0.699512	0.275468	-17.454	0.271991	-0.271991	0.489727	-17.1168	-0.155906	0.155906	0.686428	-17.8566	0.405386	-0.405386	0.403841	-17.4807	0.845452	-0.845452	0.0640832
SUT453	ST0271	-23.6646	0.177572	-0.177572	1	-24.4183	1.52398	-1.52398	0.393772	-23.3242	-0.417331	0.417331	1	-24.3808	-1.72409	1.72409	0.552398	-23.2461	0.233346	-0.233346	1
SUT454	ST0272	-35.7755	-28.4812	28.4812	0.0675844	-21.9096	0.960042	-0.960042	0.221516	-21.1245	-0.363511	0.363511	0.649505	-36.232	27.5681	-27.5681	0.206438	-35.4873	29.0574	-29.0574	0.0109414
SUT455	NA	-19.4464	-3.08888	3.08888	9.39404e-05	-18.0334	0.485394	-0.485394	0.241482	-17.9807	0.626485	-0.626485	0.115017	-19.6389	2.58966	-2.58966	9.952e-05	-19.5458	2.46407	-2.46407	0.000110518
SUT456	ST0301	-18.3087	0.109717	-0.109717	0.765288	-18.2024	-0.106485	0.106485	0.806401	-17.9664	-0.331861	0.331861	0.405238	-18.2043	-0.0149066	0.0149066	0.928087	-17.9304	0.220893	-0.220893	0.697991
SUT457	NA	-19.7221	0.46744	-0.46744	0.470859	-19.3425	-1.05339	1.05339	0.0231159	-19.6782	-0.134832	0.134832	0.833895	-19.1556	0.551405	-0.551405	0.349717	-19.4555	-0.360213	0.360213	0.509741
SUT458	ST0333	-19.1389	0.52703	-0.52703	0.343598	-19.1363	-0.312848	0.312848	0.487896	-18.7989	-0.741289	0.741289	0.0777085	-18.9314	-0.226139	0.226139	0.57802	-18.5529	0.218858	-0.218858	0.740843
SUT459	NA	-20.529	-2.92374	2.92374	0.0014727	-18.9166	-0.0877766	0.0877766	0.849126	-18.8909	0.107459	-0.107459	0.841733	-20.4361	2.99534	-2.99534	9.94965e-05	-20.3722	2.81131	-2.81131	0.000269116
SUT460	ST0386,ST0387	-19.6404	0.129258	-0.129258	0.736844	-19.6213	0.0303177	-0.0303177	1	-19.5212	0.0769175	-0.0769175	0.885016	-19.6084	-0.179341	0.179341	0.692807	-19.4727	-0.219857	0.219857	0.683059
SUT461	ST0419	-18.1022	-0.451269	0.451269	0.52784	-17.8461	0.133428	-0.133428	0.725999	-17.5512	-0.209699	0.209699	0.601215	-18.1222	0.297319	-0.297319	0.59126	-17.7904	0.648881	-0.648881	0.180808
SUT462	ST0459,ST0460	-19.4129	0.204293	-0.204293	0.676096	-19.3286	-0.171021	0.171021	0.734991	-19.245	-0.0915454	0.0915454	0.870056	-19.2804	-0.0534294	0.0534294	0.805378	-19.1593	-0.123158	0.123158	0.783654
SUT463	NA	-50.0161	0	0	1	-50.0161	0	0	1	-50.0161	0	0	1	-50.0161	0	0	1	-50.0161	0	0	1
SUT464	NA	-21.0591	-5.0335	5.0335	6.35418e-06	-18.631	0.377475	-0.377475	0.376042	-18.7214	0.804974	-0.804974	0.0558322	-21.2011	4.63531	-4.63531	8.33392e-06	-21.2537	4.21832	-4.21832	2.46231e-05
SUT465	NA	-19.267	-2.6177	2.6177	0.000399571	-17.7729	-0.203278	0.203278	0.643281	-17.6856	-0.131	0.131	0.758019	-19.1256	2.78636	-2.78636	5.01269e-06	-19.0022	2.72119	-2.72119	4.50226e-06
SUT466	NA	-18.3386	-1.97852	1.97852	0.0027417	-17.0875	-0.315633	0.315633	0.413923	-17.1348	0.0254454	-0.0254454	0.965666	-18.1318	2.27793	-2.27793	8.99118e-06	-18.1412	1.94735	-1.94735	0.000119565
SUT467	NA	-20.3951	-1.19151	1.19151	0.178496	-19.1075	-1.21	1.21	0.00815042	-19.4227	-0.332487	0.332487	0.526765	-19.7477	2.37225	-2.37225	0.00057279	-20.0283	1.49918	-1.49918	0.0311221
SUT468	ST0505	-19.7676	-1.61643	1.61643	0.032737	-18.7789	-0.148579	0.148579	0.72734	-18.8977	0.335579	-0.335579	0.444931	-19.6442	1.74908	-1.74908	0.00641045	-19.7257	1.27428	-1.27428	0.0568072
SUT469	NA	-19.4505	-1.33185	1.33185	0.080322	-18.3991	-0.561091	0.561091	0.178134	-18.3952	-0.322246	0.322246	0.436255	-19.1205	1.87753	-1.87753	0.00165559	-19.0786	1.64946	-1.64946	0.00383083
SUT470	NA	-20.5784	-1.35094	1.35094	0.142267	-19.8965	0.197966	-0.197966	0.68703	-19.6978	0.0470145	-0.0470145	0.957333	-20.6257	1.14226	-1.14226	0.266242	-20.3924	1.29689	-1.29689	0.111672
SUT471	NA	-21.1501	-1.68153	1.68153	0.0977113	-20.2512	0.101021	-0.101021	0.870693	-20.0685	-0.0179421	0.0179421	1	-21.1467	1.57415	-1.57415	0.141298	-20.9244	1.70681	-1.70681	0.0691251
SUT472	ST0532	-19.4918	-2.99812	2.99812	0.000145506	-18.1027	0.431975	-0.431975	0.285602	-17.7865	0.0459871	-0.0459871	0.934161	-19.6586	2.55027	-2.55027	0.000125909	-19.3038	2.94816	-2.94816	2.7674e-06
SUT473	NA	-19.3134	-1.60591	1.60591	0.0292983	-18.5438	0.276817	-0.276817	0.528526	-18.3191	0.0740096	-0.0740096	0.870212	-19.4043	1.30999	-1.30999	0.0271219	-19.138	1.53079	-1.53079	0.00873974
SUT474	NA	-20.0687	-2.37038	2.37038	0.00325713	-18.8991	0.242873	-0.242873	0.575118	-18.6131	-0.0826893	0.0826893	0.866269	-20.1409	2.11177	-2.11177	0.00347117	-19.8161	2.4496	-2.4496	0.000335718
SUT475	ST0610,ST0611	-17.5283	-0.00624693	0.00624693	0.91525	-17.5029	0.174142	-0.174142	0.674501	-17.2958	0.00643381	-0.00643381	1	-17.5641	-0.179577	0.179577	0.619321	-17.3183	0.000325643	-0.000325643	0.945778
SUT476	ST0613	-20.7109	-1.72984	1.72984	0.0518599	-19.9974	0.518964	-0.518964	0.290257	-19.4209	-0.387647	0.387647	0.386907	-20.9166	1.20429	-1.20429	0.204179	-20.3074	2.11078	-2.11078	0.00626856
SUT477	NA	-20.4905	-1.52668	1.52668	0.102274	-19.5454	-0.142576	0.142576	0.782633	-19.3929	-0.201005	0.201005	0.655181	-20.3675	1.65868	-1.65868	0.0320895	-20.1805	1.72086	-1.72086	0.0157234
SUT478	ST0617	-37.9117	-24.2087	24.2087	1	-37.8549	24.3222	-24.3222	1	-37.7933	24.4455	-24.4455	1	-50.0161	0	0	1	-50.0161	0	0	1
SUT479	NA	-18.6041	0.145436	-0.145436	0.745334	-18.3058	-0.55116	0.55116	0.187047	-18.5866	0.257216	-0.257216	0.547709	-18.2841	0.380569	-0.380569	0.471892	-18.5292	-0.421533	0.421533	0.347291
SUT480	NA	-19.8065	-1.92387	1.92387	0.0152705	-19.0793	0.665439	-0.665439	0.127533	-18.7836	0.320776	-0.320776	0.456981	-20.0907	1.24138	-1.24138	0.0698636	-19.7613	1.58839	-1.58839	0.0143831
SUT481	NA	-18.7785	0.49407	-0.49407	0.337668	-18.8211	-0.187603	0.187603	0.667276	-18.808	0.0325614	-0.0325614	0.949497	-18.6322	-0.315746	0.315746	0.475457	-18.5807	-0.52461	0.52461	0.213019
SUT482	ST0670,ST0671	-19.9163	-0.675194	0.675194	0.432539	-19.3372	-0.271566	0.271566	0.589913	-19.2175	-0.26428	0.26428	0.570487	-19.7281	0.937475	-0.937475	0.198011	-19.5704	0.94098	-0.94098	0.153654
SUT483	ST0685	-19.5682	-1.09628	1.09628	0.127722	-19.0411	0.236152	-0.236152	0.595417	-18.9283	0.257375	-0.257375	0.566176	-19.6408	0.836976	-0.836976	0.21293	-19.4914	0.823971	-0.823971	0.192628
SUT484	ST0688	-21.9894	-3.17284	3.17284	0.0162986	-20.4224	0.225683	-0.225683	0.659593	-20.6864	1.00054	-1.00054	0.0781663	-22.0586	2.92027	-2.92027	0.0303891	-22.2881	2.14943	-2.14943	0.142771
SUT485	ST0704	-18.8331	-0.43823	0.43823	0.563498	-18.6189	0.210351	-0.210351	0.613725	-18.4326	0.0843343	-0.0843343	0.861284	-18.8896	0.211213	-0.211213	0.79411	-18.6672	0.344103	-0.344103	0.553395
SUT486	ST0712	-35.6592	-28.7138	28.7138	0.0342382	-21.3836	0.393219	-0.393219	0.678919	-20.9324	-0.26281	0.26281	0.677738	-35.8313	28.3695	-28.3695	0.0504403	-35.4156	29.201	-29.201	0.00509791
SUT487	ST0715	-21.3185	-0.514554	0.514554	0.64423	-20.9259	-0.0697548	0.0697548	1	-20.7848	-0.105233	0.105233	0.922741	-21.2329	0.571605	-0.571605	0.697998	-21.0523	0.62103	-0.62103	0.626948
SUT488	NA	-20.2369	-2.67775	2.67775	0.00215224	-18.6048	-0.359266	0.359266	0.37985	-18.9565	0.590598	-0.590598	0.181766	-20.0037	3.03011	-3.03011	2.74294e-05	-20.3203	2.08495	-2.08495	0.00757356
SUT489	ST0725	-19.9255	-1.30054	1.30054	0.10408	-19.1502	-0.0564535	0.0564535	0.931038	-19.2322	0.354434	-0.354434	0.443179	-19.8541	1.32918	-1.32918	0.0515855	-19.899	0.927621	-0.927621	0.15911
SUT490	NA	-20.2818	-0.973384	0.973384	0.275033	-20.001	0.649953	-0.649953	0.207619	-19.5764	0.0471013	-0.0471013	1	-20.5498	0.323073	-0.323073	0.768325	-20.0868	0.937266	-0.937266	0.202003
SUT491	ST0743	-20.1448	1.31296	-1.31296	0.0517391	-20.3146	-0.774937	0.774937	0.158221	-20.3766	-0.404144	0.404144	0.486944	-19.7112	-0.559819	0.559819	0.334902	-19.7332	-0.915618	0.915618	0.0862491
SUT492	NA	-18.9596	-0.447825	0.447825	0.558448	-18.5131	-0.236751	0.236751	0.593399	-18.4988	-0.0187215	0.0187215	0.958483	-18.7909	0.671118	-0.671118	0.245712	-18.741	0.459079	-0.459079	0.420989
SUT493	NA	-20.4025	-0.731827	0.731827	0.460722	-20.3405	0.820814	-0.820814	0.113946	-19.6989	-0.215755	0.215755	0.666246	-20.7596	-0.096363	0.096363	0.865859	-20.0804	0.950143	-0.950143	0.202003
SUT494	ST0778	-20.5165	-0.948602	0.948602	0.29405	-20.0408	0.191951	-0.191951	0.720686	-19.6572	-0.32861	0.32861	0.497662	-20.5668	0.734035	-0.734035	0.400663	-20.1459	1.26393	-1.26393	0.105225
SUT495	NA	-21.0663	-3.01908	3.01908	0.00308639	-19.6458	0.375179	-0.375179	0.422092	-19.4172	0.16471	-0.16471	0.714731	-21.2096	2.6183	-2.6183	0.0116934	-20.9368	2.85194	-2.85194	0.00209042
SUT496	NA	-35.9175	-28.197	28.197	0.0262834	-22.0471	0.685031	-0.685031	0.450198	-22.2399	1.31701	-1.31701	0.0940773	-36.232	27.5681	-27.5681	0.206438	-36.4635	27.1051	-27.1051	0.191544
SUT497	NA	-50.0161	0	0	1	-50.0161	0	0	1	-36.6869	-26.6584	26.6584	0.0723949	-50.0161	0	0	1	-36.6968	26.6385	-26.6385	0.322673
SUT498	NA	-19.0737	-0.664429	0.664429	0.359604	-18.5759	-0.114281	0.114281	0.80545	-18.3794	-0.26081	0.26081	0.529896	-18.9657	0.766258	-0.766258	0.18756	-18.7295	0.926872	-0.926872	0.0892732
SUT499	ST0801	-19.6575	-2.66671	2.66671	0.000532339	-18.271	0.107725	-0.107725	0.799105	-17.9877	-0.212402	0.212402	0.611468	-19.6615	2.5446	-2.5446	0.000125909	-19.3381	2.8795	-2.8795	5.95377e-06
SUT500	NA	-19.1976	-0.756393	0.756393	0.30958	-18.7057	-1.84187e-05	1.84187e-05	1	-18.5038	-0.157262	0.157262	0.713608	-19.1423	0.752923	-0.752923	0.20924	-18.9031	0.919425	-0.919425	0.0951758
SUT501	NA	-20.29	0.598255	-0.598255	0.417759	-20.8023	0.609739	-0.609739	0.295832	-20.8495	0.951127	-0.951127	0.103765	-20.5503	-1.23311	1.23311	0.0702659	-20.5648	-1.57399	1.57399	0.0316919
SUT502	ST0808	-37.9011	-24.2298	24.2298	1	-25.4298	-0.498955	0.498955	1	-37.786	24.4601	-24.4601	1	-37.6294	24.7732	-24.7732	1	-50.0161	0	0	1
SUT503	NA	-19.7198	-2.09738	2.09738	0.00749559	-18.2221	-0.714966	0.714966	0.0884902	-18.3655	-0.181352	0.181352	0.684284	-19.3199	2.78298	-2.78298	6.22041e-06	-19.4254	2.26021	-2.26021	0.000307719
SUT504	ST0844	-17.9776	-1.10756	1.10756	0.0823484	-17.6087	0.573613	-0.573613	0.147039	-17.1232	-0.150795	0.150795	0.700612	-18.2178	0.512997	-0.512997	0.308507	-17.6925	1.2518	-1.2518	0.00767343
SUT505	NA	-20.5146	-1.47853	1.47853	0.0983114	-19.543	-0.265725	0.265725	0.624131	-19.7587	0.41234	-0.41234	0.407877	-20.3344	1.72488	-1.72488	0.0273527	-20.5135	1.0547	-1.0547	0.158284
SUT506	NA	-17.71	-2.81276	2.81276	2.18464e-05	-16.2261	0.0465772	-0.0465772	0.899146	-16.0139	-0.131289	0.131289	0.726814	-17.6857	2.74716	-2.74716	5.78878e-08	-17.4348	2.93708	-2.93708	2.39278e-09
SUT507	NA	-20.4482	-1.61133	1.61133	0.0715406	-19.6941	0.316063	-0.316063	0.512926	-19.4578	0.090016	-0.090016	0.851619	-20.5565	1.28054	-1.28054	0.151995	-20.2807	1.52042	-1.52042	0.0402311
SUT508	NA	-19.0849	-0.062887	0.062887	1	-18.7091	-0.506226	0.506226	0.246106	-18.5819	-0.513795	0.513795	0.233633	-18.7892	0.540174	-0.540174	0.34716	-18.6235	0.559683	-0.559683	0.30499
SUT509	NA	-18.55	-1.40768	1.40768	0.0358479	-17.7543	0.0124835	-0.0124835	1	-17.6941	0.138631	-0.138631	0.732671	-18.5115	1.3706	-1.3706	0.00916227	-18.4121	1.25748	-1.25748	0.0150872
SUT510	ST0866	-19.0148	0.278812	-0.278812	0.569804	-18.6288	-0.831738	0.831738	0.0479979	-18.7528	-0.337187	0.337187	0.427423	-18.5479	0.540838	-0.540838	0.331435	-18.632	0.0607285	-0.0607285	1
SUT511	NA	-21.008	-0.491851	0.491851	0.694114	-20.7596	0.176836	-0.176836	0.835213	-20.9707	0.846217	-0.846217	0.153489	-21.0549	0.283747	-0.283747	0.853057	-21.2314	-0.381074	0.381074	0.568116
SUT512	ST0871	-19.6831	0.0284602	-0.0284602	0.890719	-19.4882	-0.207996	0.207996	0.669725	-19.6278	0.317872	-0.317872	0.468032	-19.5306	0.162434	-0.162434	0.855315	-19.6269	-0.341983	0.341983	0.464514
SUT513	ST0884	-19.7761	0.740395	-0.740395	0.213234	-19.7659	-0.559321	0.559321	0.263912	-19.5795	-0.685278	0.685278	0.142076	-19.4468	-0.195937	0.195937	0.647847	-19.2278	-0.0697568	0.0697568	0.888199
SUT514	ST0892	-17.1023	-0.376216	0.376216	0.574938	-16.7675	-0.0842447	0.0842447	0.833041	-16.6143	-0.143944	0.143944	0.709496	-17.0107	0.44526	-0.44526	0.340026	-16.8192	0.516406	-0.516406	0.24835
SUT515	NA	-21.5272	-0.0973123	0.0973123	1	-21.4643	0.190765	-0.190765	1	-21.1245	-0.242353	0.242353	0.72925	-21.5749	-0.112227	0.112227	0.821124	-21.1904	0.344833	-0.344833	1
SUT516	ST0929,ST0930	-21.5384	-2.07472	2.07472	0.0895564	-20.874	0.926324	-0.926324	0.14123	-20.0154	-0.543801	0.543801	0.314558	-21.9634	1.11059	-1.11059	0.45804	-21.0616	2.60246	-2.60246	0.00731709
SUT517	ST0955	-20.281	-1.94568	1.94568	0.0200604	-19.3265	0.2301	-0.2301	0.594525	-19.2595	0.342923	-0.342923	0.433626	-20.3479	1.69784	-1.69784	0.0337178	-20.2476	1.58648	-1.58648	0.0292453
SUT518	NA	-50.0161	0	0	1	-50.0161	0	0	1	-50.0161	0	0	1	-50.0161	0	0	1	-50.0161	0	0	1
SUT519	ST0961	-36.1583	-27.7155	27.7155	0.0552824	-22.3985	0.394881	-0.394881	0.668428	-22.4735	0.791788	-0.791788	0.422069	-36.3372	27.3576	-27.3576	0.192139	-36.4531	27.126	-27.126	0.191544
SUT520	NA	-18.3947	-1.44328	1.44328	0.0267305	-17.6216	0.104281	-0.104281	0.801107	-17.739	0.585632	-0.585632	0.139932	-18.3985	1.32156	-1.32156	0.0110907	-18.4774	0.851966	-0.851966	0.091885
SUT521	ST0966	-20.306	-1.89584	1.89584	0.0244476	-19.4025	0.310037	-0.310037	0.548923	-19.2231	0.197737	-0.197737	0.65426	-20.4115	1.5707	-1.5707	0.0483848	-20.191	1.69979	-1.69979	0.0178956
SUT522	ST0969	-22.5616	-2.02837	2.02837	0.180995	-20.755	-1.36818	1.36818	0.0150841	-21.453	0.274373	-0.274373	0.78709	-21.8247	3.38813	-3.38813	0.00498587	-22.4865	1.75253	-1.75253	0.341679
SUT523	ST0970	-50.0161	0	0	1	-36.5996	-26.8329	26.8329	0.136607	-37.3461	-25.3399	25.3399	0.507742	-36.6305	26.7711	-26.7711	0.564941	-37.3566	25.3188	-25.3188	1
SUT524	ST0986,ST0987	-20.5577	-0.866365	0.866365	0.369392	-20.6248	1.21584	-1.21584	0.0343129	-20.0168	0.246561	-0.246561	0.60439	-21.1192	-0.37091	0.37091	0.68669	-20.4652	0.625358	-0.625358	0.465835
SUT525	ST0993	-21.5916	0.031488	-0.031488	1	-21.2063	-0.59395	0.59395	0.368778	-21.3981	0.0364093	-0.0364093	1	-21.2479	0.541631	-0.541631	0.697998	-21.4011	-0.0766193	0.0766193	1
SUT526	NA	-35.927	-28.1781	28.1781	0.0262834	-22.4688	1.45336	-1.45336	0.0795544	-22.4958	1.75436	-1.75436	0.0273182	-36.635	26.7622	-26.7622	0.564941	-36.7022	26.6276	-26.6276	0.322673
SUT527	NA	-18.6416	-2.18583	2.18583	0.00139064	-17.5286	0.174745	-0.174745	0.657504	-17.3341	0.0322946	-0.0322946	0.951056	-18.6777	1.99949	-1.99949	0.000316399	-18.4458	2.15149	-2.15149	4.60163e-05
SUT528	NA	-18.9789	-0.274878	0.274878	0.794482	-18.8564	0.274447	-0.274447	0.559122	-18.7955	0.398984	-0.398984	0.362554	-19.0591	0.000492727	-0.000492727	1	-18.9586	-0.110464	0.110464	0.757287
SUT529	ST1013	-21.0216	-0.46465	0.46465	0.689666	-21.0809	0.796391	-0.796391	0.237159	-20.8303	0.541825	-0.541825	0.323524	-21.3695	-0.345278	0.345278	0.658238	-21.0802	-0.078546	0.078546	0.859832
SUT530	ST1022	-23.1646	1.17757	-1.17757	0.715347	-23.1261	-1.06038	1.06038	0.580596	-23.6187	0.171768	-0.171768	0.742407	-22.5886	-0.139705	0.139705	0.736341	-23.04	-1.35435	1.35435	0.420671
SUT531	NA	-19.0304	-2.17189	2.17189	0.00215987	-18.1733	0.688907	-0.688907	0.089041	-17.9255	0.439773	-0.439773	0.271406	-19.3186	1.48147	-1.48147	0.0131657	-19.0341	1.73863	-1.73863	0.00213179
SUT532	NA	-20.3233	-0.165265	0.165265	1	-20.1493	0.0440329	-0.0440329	1	-20.2324	0.456736	-0.456736	0.386176	-20.2924	0.112867	-0.112867	1	-20.3374	-0.288935	0.288935	0.611177
SUT533	ST1044	-19.9069	-0.418999	0.418999	0.712922	-19.7564	0.328485	-0.328485	0.499645	-19.2833	-0.371105	0.371105	0.423784	-20.0225	0.0736113	-0.0736113	1	-19.5093	0.788203	-0.788203	0.238645
SUT534	ST1045	-18.9181	-2.1454	2.1454	0.00224408	-17.814	0.152119	-0.152119	0.702499	-17.6151	0.00100333	-0.00100333	1	-18.9427	1.98215	-1.98215	0.000452507	-18.7065	2.14263	-2.14263	9.94775e-05
SUT535	NA	-19.9064	-1.72417	1.72417	0.0329738	-18.5994	-0.692348	0.692348	0.108568	-18.4262	-0.792055	0.792055	0.0538185	-19.5144	2.39398	-2.39398	0.00014762	-19.3037	2.5035	-2.5035	4.27728e-05
SUT536	ST1071	-19.4707	-1.29136	1.29136	0.091625	-18.9322	0.426019	-0.426019	0.323042	-18.5227	-0.146416	0.146416	0.730694	-19.6347	0.84928	-0.84928	0.21293	-19.1865	1.4338	-1.4338	0.0143604
SUT537	ST1075	-18.4333	-0.997393	0.997393	0.136312	-17.9997	0.353674	-0.353674	0.381413	-17.8356	0.271936	-0.271936	0.49431	-18.558	0.633722	-0.633722	0.221694	-18.3543	0.729374	-0.729374	0.161751
SUT538	ST1086	-23.4162	-0.319182	0.319182	1	-22.4281	-1.41231	1.41231	0.0795544	-23.1921	0.361754	-0.361754	0.77136	-22.6516	1.73429	-1.73429	0.552955	-23.3756	-0.0256327	0.0256327	0.675348
SUT539	NA	-19.6294	-0.278154	0.278154	0.798585	-19.4147	0.0683889	-0.0683889	0.918468	-19.0827	-0.349047	0.349047	0.43342	-19.612	0.198793	-0.198793	0.923919	-19.2404	0.630141	-0.630141	0.323873
SUT540	NA	-18.306	-0.450819	0.450819	0.507482	-17.9736	-0.0285646	0.0285646	0.983199	-17.7634	-0.202239	0.202239	0.626271	-18.2484	0.451922	-0.451922	0.382588	-18.0001	0.63668	-0.63668	0.181476
SUT541	NA	-18.0301	-1.27756	1.27756	0.0464174	-17.3522	0.135091	-0.135091	0.735195	-17.0617	-0.19923	0.19923	0.600864	-18.0482	1.12731	-1.12731	0.023178	-17.7183	1.47515	-1.47515	0.00196521
SUT542	ST1119	-20.2503	-0.651068	0.651068	0.493534	-19.4741	-0.69152	0.69152	0.142902	-19.7108	0.0284652	-0.0284652	1	-19.8544	1.32876	-1.32876	0.0515855	-20.0535	0.618526	-0.618526	0.483466
SUT543	ST1140,ST1141	-20.3761	-1.22957	1.22957	0.178496	-19.6722	0.0680182	-0.0680182	0.952654	-19.7798	0.529553	-0.529553	0.28667	-20.3502	1.16712	-1.16712	0.143019	-20.4186	0.718464	-0.718464	0.406473
SUT544	NA	-18.5427	-0.778591	0.778591	0.25875	-18.1084	0.119152	-0.119152	0.783004	-17.9196	-0.0119336	0.0119336	0.985619	-18.5541	0.641619	-0.641619	0.221694	-18.3263	0.785368	-0.785368	0.121407
SUT545	ST1156	-20.393	-0.0257552	0.0257552	0.919906	-20.0409	-0.486468	0.486468	0.38509	-20.1559	-0.00950702	0.00950702	1	-20.1014	0.494743	-0.494743	0.557429	-20.1845	0.0167538	-0.0167538	1
SUT546	NA	-34.3671	-31.298	31.298	3.23056e-07	-18.7343	0.292603	-0.292603	0.540511	-18.9247	0.919538	-0.919538	0.0329261	-34.4798	31.0725	-31.0725	3.70687e-07	-34.7084	30.6153	-30.6153	1.15852e-05
SUT547	ST1182	-50.0161	0	0	1	-50.0161	0	0	1	-50.0161	0	0	1	-50.0161	0	0	1	-50.0161	0	0	1
SUT548	NA	-21.012	0.0422264	-0.0422264	1	-20.9136	-0.0262098	0.0262098	1	-20.5296	-0.54765	0.54765	0.354088	-20.952	-0.0363534	0.0363534	1	-20.5236	0.508425	-0.508425	0.700972
SUT549	NA	-19.1776	-1.18173	1.18173	0.0980014	-18.5442	0.150946	-0.150946	0.739685	-18.674	0.656914	-0.656914	0.120599	-19.1968	1.02914	-1.02914	0.0724659	-19.2893	0.532339	-0.532339	0.379328
SUT550	ST1214,ST1215	-19.4476	-1.08658	1.08658	0.139596	-18.7974	-0.0184904	0.0184904	1	-18.7973	0.227977	-0.227977	0.617644	-19.3935	1.08049	-1.08049	0.0840204	-19.3568	0.842093	-0.842093	0.180397
SUT551	NA	-18.8551	-0.271562	0.271562	0.777298	-18.7932	0.383419	-0.383419	0.401601	-18.4125	-0.131555	0.131555	0.747017	-18.9924	-0.117332	0.117332	0.775711	-18.572	0.411614	-0.411614	0.458548
SUT552	ST1231	-21.2726	-0.606395	0.606395	0.650372	-20.9716	0.234498	-0.234498	0.814359	-20.5169	-0.428612	0.428612	0.405108	-21.3357	0.366133	-0.366133	1	-20.8469	1.03188	-1.03188	0.215724
SUT553	NA	-23.0244	3.5411	-3.5411	0.00569849	-22.9429	-3.48504	3.48504	0.000405203	-23.221	-2.68216	2.68216	0.0152897	-21.2278	-0.0619544	0.0619544	0.836936	-21.4693	-0.8569	0.8569	0.373733
SUT554	ST1260	-21.4904	-1.00094	1.00094	0.439161	-20.6275	-0.485553	0.485553	0.380132	-20.7969	0.0994107	-0.0994107	1	-21.1946	1.47845	-1.47845	0.136051	-21.3195	0.916607	-0.916607	0.384111
SUT555	NA	-20.3299	-0.87713	0.87713	0.337039	-20.0631	0.560378	-0.560378	0.281267	-19.9319	0.544314	-0.544314	0.242956	-20.5616	0.29961	-0.29961	0.768325	-20.3856	0.339646	-0.339646	0.710905
SUT556	NA	-35.3587	-29.3147	29.3147	0.00514046	-21.2296	1.25102	-1.25102	0.0475502	-20.5201	0.0788611	-0.0788611	0.933122	-35.9674	28.0974	-28.0974	0.0726459	-35.2967	29.4387	-29.4387	0.0018774
SUT557	NA	-18.4173	-1.14713	1.14713	0.0790175	-17.6259	-0.246427	0.246427	0.544114	-17.6143	-0.022963	0.022963	0.964729	-18.2495	1.36855	-1.36855	0.00721209	-18.2003	1.15501	-1.15501	0.0208046
SUT558	NA	-19.7075	-3.09284	3.09284	0.000124276	-18.1585	0.189589	-0.189589	0.636252	-17.9916	0.102464	-0.102464	0.821109	-19.7571	2.87941	-2.87941	1.43339e-05	-19.5525	2.9768	-2.9768	7.54914e-06
SUT559	NA	-19.7413	-0.268161	0.268161	0.785845	-19.3465	-0.306833	0.306833	0.553981	-19.4526	0.151991	-0.151991	0.744809	-19.5325	0.571625	-0.571625	0.4311	-19.6063	0.112063	-0.112063	0.932401
SUT560	NA	-19.9713	-0.56514	0.56514	0.502443	-19.4144	-0.372103	0.372103	0.450438	-19.2372	-0.479333	0.479333	0.312117	-19.7455	0.902564	-0.902564	0.194132	-19.5304	1.02101	-1.02101	0.0972978
SUT561	ST1295	-50.0161	0	0	1	-50.0161	0	0	1	-37.8512	-24.3298	24.3298	1	-50.0161	0	0	1	-37.8601	24.3118	-24.3118	1
SUT562	ST1299	-20.2283	-0.0512571	0.0512571	0.926919	-20.0396	-0.114295	0.114295	0.885267	-19.9424	-0.0620746	0.0620746	0.950498	-20.1202	0.153167	-0.153167	0.902545	-19.9813	0.119263	-0.119263	1
SUT563	NA	-21.3854	0.263057	-0.263057	0.736486	-21.1094	-0.650913	0.650913	0.536366	-20.8403	-0.941605	0.941605	0.131232	-21.0154	0.362781	-0.362781	0.853057	-20.7233	0.635152	-0.635152	0.422029
SUT564	ST1310	-19.3113	-2.529	2.529	0.000674474	-18.121	0.3496	-0.3496	0.393192	-18.1002	0.554502	-0.554502	0.173239	-19.4386	2.16023	-2.16023	0.000788993	-19.3808	1.96403	-1.96403	0.00138919
SUT565	ST1318	-22.2186	0.455492	-0.455492	0.800933	-21.9267	-0.835892	0.835892	0.358312	-22.1968	-0.0489569	0.0489569	1	-21.7493	0.368926	-0.368926	1	-21.9912	-0.426632	0.426632	0.800493
SUT566	NA	-19.4193	-1.9731	1.9731	0.00887953	-18.4223	0.192947	-0.192947	0.654409	-18.3425	0.279851	-0.279851	0.508947	-19.4657	1.76626	-1.76626	0.00491846	-19.3473	1.69109	-1.69109	0.00491978
SUT567	ST1337	-18.7808	0.749911	-0.749911	0.171011	-18.8292	-0.452458	0.452458	0.314205	-18.8355	-0.193203	0.193203	0.676668	-18.5066	-0.315513	0.315513	0.469383	-18.4753	-0.564856	0.564856	0.204454
SUT568	NA	-36.719	-26.5942	26.5942	0.205111	-22.8356	-0.983759	0.983759	0.615739	-23.0146	-0.378735	0.378735	1	-36.2151	27.602	-27.602	0.206438	-36.4372	27.1578	-27.1578	0.205719
SUT569	NA	-17.9316	0.377287	-0.377287	0.425797	-18.3556	0.688466	-0.688466	0.108697	-17.9982	0.220181	-0.220181	0.595682	-18.228	-1.08431	1.08431	0.0139182	-17.8282	-0.596614	0.596614	0.134244
SUT570	NA	-19.8253	-1.50105	1.50105	0.0496685	-18.9699	0.00157814	-0.00157814	1	-19.0587	0.425709	-0.425709	0.342856	-19.7764	1.48469	-1.48469	0.0233747	-19.8284	1.06887	-1.06887	0.110364
SUT571	NA	-20.4657	-2.22018	2.22018	0.0159124	-19.0459	-0.444599	0.444599	0.370316	-19.2801	0.270828	-0.270828	0.532536	-20.201	2.63544	-2.63544	0.000596784	-20.4028	1.92004	-1.92004	0.00908766
SUT572	NA	-18.4743	-0.203047	0.203047	0.848035	-18.3808	0.225022	-0.225022	0.586158	-18.4275	0.564932	-0.564932	0.165543	-18.5378	-0.0380914	0.0380914	0.91266	-18.5436	-0.361504	0.361504	0.367762
SUT573	NA	-18.7166	-0.79949	0.79949	0.244074	-18.0871	-0.240868	0.240868	0.554831	-18.0477	-0.0730897	0.0730897	0.875487	-18.5449	1.02885	-1.02885	0.0518053	-18.4665	0.87386	-0.87386	0.0868645
SUT574	ST1398	-16.975	-0.217842	0.217842	0.783504	-16.793	0.0689446	-0.0689446	0.860751	-16.7146	0.158783	-0.158783	0.678299	-16.9596	0.134657	-0.134657	0.822204	-16.8418	0.0583259	-0.0583259	0.96029
SUT575	ST1405	-18.2619	-1.98398	1.98398	0.00263653	-17.4184	0.512569	-0.512569	0.183234	-17.152	0.226276	-0.226276	0.564238	-18.4666	1.46033	-1.46033	0.00491811	-18.1625	1.75674	-1.75674	0.000440246
SUT576	NA	-20.2427	-0.666285	0.666285	0.493534	-19.5726	-0.460684	0.460684	0.346595	-19.7325	0.105793	-0.105793	0.912993	-19.9625	1.11256	-1.11256	0.129243	-20.0861	0.553407	-0.553407	0.479436
SUT577	ST1410	-21.8713	-0.239176	0.239176	0.839517	-21.8283	0.348541	-0.348541	0.735889	-21.5662	0.0712343	-0.0712343	1	-22.0005	-0.133468	0.133468	1	-21.6985	0.158636	-0.158636	1
SUT578	NA	-20.0515	-1.43397	1.43397	0.0901828	-19.115	-0.209615	0.209615	0.668437	-19.1125	0.0319203	-0.0319203	1	-19.8913	1.64011	-1.64011	0.0200736	-19.8521	1.40678	-1.40678	0.0378529
SUT579	ST1447	-18.8747	-1.22719	1.22719	0.0739339	-18.058	-0.187841	0.187841	0.640226	-17.9935	-0.0704143	0.0704143	0.879622	-18.7297	1.40318	-1.40318	0.00958548	-18.6262	1.29826	-1.29826	0.014196
SUT580	NA	-19.3577	-1.7923	1.7923	0.0136297	-18.5131	0.317534	-0.317534	0.459566	-18.5228	0.583615	-0.583615	0.165863	-19.4668	1.45995	-1.45995	0.0179598	-19.4385	1.2048	-1.2048	0.0445222
SUT581	NA	-19.3477	0.328405	-0.328405	0.522575	-19.3199	-0.169382	0.169382	0.700586	-19.132	-0.298611	0.298611	0.514276	-19.2149	-0.176881	0.176881	0.689792	-18.986	-0.0309643	0.0309643	0.901038
SUT582	ST1468	-36.2548	-27.5225	27.5225	0.135458	-22.6106	0.462744	-0.462744	0.810362	-22.9487	1.38537	-1.38537	0.353709	-36.4625	27.107	-27.107	0.323241	-36.8444	26.3433	-26.3433	0.322673
SUT583	NA	-20.5309	-6.08989	6.08989	7.39429e-09	-17.5898	0.427901	-0.427901	0.272258	-17.2124	-0.0804279	0.0804279	0.838154	-20.6928	5.65181	-5.65181	5.50992e-10	-20.277	6.17161	-6.17161	5.14398e-13
SUT584	NA	-20.2262	-0.0553454	0.0553454	0.926919	-20.0332	-0.108961	0.108961	0.941942	-19.9911	0.0532438	-0.0532438	1	-20.1155	0.162608	-0.162608	1	-20.0382	0.00545031	-0.00545031	1
SUT585	ST1492	-21.5173	-0.947152	0.947152	0.524148	-21.0027	0.135569	-0.135569	1	-20.9616	0.299765	-0.299765	0.598074	-21.536	0.795515	-0.795515	0.393156	-21.4527	0.650342	-0.650342	0.70063
SUT586	NA	-20.7472	-0.487299	0.487299	0.727864	-19.8881	-1.01823	1.01823	0.0376396	-19.9365	-0.674923	0.674923	0.148419	-20.1893	1.48886	-1.48886	0.0417068	-20.2015	1.15267	-1.15267	0.13986
SUT587	ST1500	-18.8455	-1.84593	1.84593	0.00690304	-17.9363	0.242667	-0.242667	0.551333	-17.8987	0.413973	-0.413973	0.296326	-18.9171	1.58849	-1.58849	0.00525503	-18.8398	1.43141	-1.43141	0.0102477
SUT588	ST1511	-18.6179	-2.10199	2.10199	0.00188596	-17.4582	-0.028198	0.028198	0.963795	-17.2371	-0.223633	0.223633	0.565562	-18.5586	2.10657	-2.10657	0.000118115	-18.3002	2.31145	-2.31145	1.08018e-05
SUT589	ST1512	-21.5658	-0.020059	0.020059	1	-21.4964	0.0641614	-0.0641614	0.880916	-21.2392	-0.203042	0.203042	0.905173	-21.5493	-0.0611698	0.0611698	0.811705	-21.262	0.20171	-0.20171	1
SUT590	NA	-18.4706	-1.04056	1.04056	0.110545	-17.8671	0.0237007	-0.0237007	0.937031	-17.4691	-0.525759	0.525759	0.178778	-18.4364	0.994717	-0.994717	0.0517271	-18.0011	1.55353	-1.55353	0.00170602
SUT591	NA	-21.0455	-1.89072	1.89072	0.0503427	-19.6984	-0.565978	0.565978	0.228595	-19.6339	-0.448783	0.448783	0.305204	-20.7051	2.45734	-2.45734	0.00347882	-20.6065	2.34266	-2.34266	0.00590704
SUT592	ST1538	-19.3511	0.194424	-0.194424	0.64508	-19.2277	-0.217908	0.217908	0.616156	-19.1494	-0.128012	0.128012	0.784467	-19.1931	0.00746876	-0.00746876	0.938131	-19.0704	-0.05902	0.05902	0.845241
SUT593	ST1542	-20.4091	0.310358	-0.310358	0.596971	-20.4442	-0.00227111	0.00227111	1	-20.5182	0.392034	-0.392034	0.496298	-20.3549	-0.316213	0.316213	0.672829	-20.3841	-0.686365	0.686365	0.272776
SUT594	ST1544	-36.4938	-27.0445	27.0445	0.221984	-22.2945	-1.14504	1.14504	0.225213	-22.2461	-0.994955	0.994955	0.196356	-35.9003	28.2316	-28.2316	0.0451569	-35.8951	28.2419	-28.2419	0.14982
SUT595	NA	-20.4914	-2.16885	2.16885	0.0114217	-19.3396	0.068552	-0.068552	0.922511	-19.0678	-0.228213	0.228213	0.63149	-20.4796	2.07832	-2.07832	0.0146065	-20.1683	2.38909	-2.38909	0.00122951
SUT596	NA	-22.3319	-0.48781	0.48781	1	-21.1944	-1.57342	1.57342	0.00946674	-21.8944	0.0732013	-0.0732013	1	-21.4964	2.04476	-2.04476	0.0468309	-22.1628	0.400108	-0.400108	1
SUT597	NA	-21.2526	-1.47647	1.47647	0.193805	-19.9413	-0.899473	0.899473	0.0563188	-20.2391	-0.0576664	0.0576664	0.883342	-20.7416	2.38443	-2.38443	0.00524224	-21.0045	1.54666	-1.54666	0.102979
SUT598	NA	-22.2544	-2.64281	2.64281	0.0946544	-20.8865	0.0985979	-0.0985979	0.91087	-20.9342	0.440944	-0.440944	0.543992	-22.2583	2.52078	-2.52078	0.0755163	-22.2755	2.17464	-2.17464	0.149262
SUT599	ST1565	-19.3256	-0.885642	0.885642	0.218947	-18.6074	-0.328303	0.328303	0.44838	-18.8038	0.310912	-0.310912	0.467211	-19.1072	1.20847	-1.20847	0.0337481	-19.266	0.578983	-0.578983	0.350383
SUT600	ST1567	-21.8173	0.483057	-0.483057	0.527404	-23.0726	2.22619	-2.22619	0.0366819	-22.6121	1.55207	-1.55207	0.0559653	-22.8827	-2.72794	2.72794	0.022057	-22.381	-2.03642	2.03642	0.0848393
SUT601	NA	-21.2261	0.915257	-0.915257	0.410998	-21.6779	0.150032	-0.150032	0.74818	-21.7662	0.574002	-0.574002	0.452989	-21.2597	-1.09658	1.09658	0.161429	-21.3195	-1.528	1.528	0.0879198
SUT602	ST1571	-20.5028	-0.976097	0.976097	0.29405	-19.6812	-0.43278	0.43278	0.371531	-20.0385	0.528116	-0.528116	0.333995	-20.2301	1.40741	-1.40741	0.0588141	-20.5544	0.446921	-0.446921	0.700972
SUT603	ST1575	-50.0161	0	0	1	-50.0161	0	0	1	-36.0542	-27.9238	27.9238	0.00205674	-50.0161	0	0	1	-36.0643	27.9034	-27.9034	0.0447101
SUT604	ST1578	-50.0161	0	0	1	-50.0161	0	0	1	-50.0161	0	0	1	-50.0161	0	0	1	-50.0161	0	0	1
SUT605	NA	-19.9224	-1.69216	1.69216	0.0405948	-19.1723	0.434084	-0.434084	0.353843	-19.3328	1.00123	-1.00123	0.0245906	-20.0827	1.25747	-1.25747	0.05826	-20.2016	0.707724	-0.707724	0.39403
SUT606	ST1598,ST1599	-18.7838	-0.536911	0.536911	0.481885	-18.4005	-0.00717085	0.00717085	1	-18.2018	-0.158085	0.158085	0.697023	-18.7268	0.536804	-0.536804	0.330866	-18.4903	0.697904	-0.697904	0.189412
SUT607	NA	-20.1817	-2.1444	2.1444	0.00847821	-18.9728	-0.0733642	0.0733642	0.906437	-18.9043	0.0362997	-0.0362997	0.946489	-20.099	2.19564	-2.19564	0.00204712	-19.9913	2.09925	-2.09925	0.00375887
SUT608	NA	-19.2306	-0.350517	0.350517	0.689922	-19.2449	0.614058	-0.614058	0.188713	-18.8177	0.00605571	-0.00605571	1	-19.485	-0.272469	0.272469	0.579977	-19.0183	0.349232	-0.349232	0.550494
SUT609	NA	-19.2722	-1.96329	1.96329	0.00694598	-18.5342	0.709797	-0.709797	0.0936371	-18.256	0.399762	-0.399762	0.326276	-19.575	1.24369	-1.24369	0.0517457	-19.2582	1.56528	-1.56528	0.00884809
SUT610	ST1619	-20.0869	-0.63792	0.63792	0.42824	-19.3985	-0.534548	0.534548	0.25178	-19.6782	0.271515	-0.271515	0.561017	-19.7733	1.15107	-1.15107	0.0679436	-20.0152	0.355338	-0.355338	0.614021
SUT611	NA	-19.9525	-2.07676	2.07676	0.00874847	-19.3275	1.03277	-1.03277	0.0226857	-18.9896	0.603678	-0.603678	0.161263	-20.4187	1.03008	-1.03008	0.202548	-20.0449	1.46594	-1.46594	0.0430688
SUT612	ST1654,ST1655	-19.906	-0.420666	0.420666	0.712922	-20.021	0.875222	-0.875222	0.0971927	-19.6169	0.313386	-0.313386	0.539567	-20.2925	-0.466325	0.466325	0.480879	-19.848	0.110718	-0.110718	0.922578
SUT613	NA	-21.7214	-1.70883	1.70883	0.156804	-21.1163	0.74552	-0.74552	0.263549	-20.9509	0.660764	-0.660764	0.296699	-22.0342	0.96904	-0.96904	0.605697	-21.8325	1.06066	-1.06066	0.391075
SUT614	ST1688	-19.9947	-0.822376	0.822376	0.380651	-19.5392	0.138053	-0.138053	0.826546	-19.3425	-0.00897776	0.00897776	1	-20.0092	0.679212	-0.679212	0.379309	-19.776	0.833681	-0.833681	0.236964
SUT615	NA	-23.0175	0.883286	-0.883286	0.715347	-22.7439	-1.22003	1.22003	0.224327	-22.7347	-0.991673	0.991673	0.353709	-22.3636	0.310301	-0.310301	1	-22.3083	0.109015	-0.109015	1
SUT616	NA	-19.328	0.423255	-0.423255	0.419062	-19.1109	-0.652913	0.652913	0.150967	-19.0091	-0.609717	0.609717	0.1575	-18.9529	0.21288	-0.21288	0.788159	-18.812	0.182716	-0.182716	0.82632
SUT617	NA	-36.7959	26.4402	-26.4402	0.333333	-36.2085	-27.6152	27.6152	0.0210465	-37.8426	-24.3469	24.3469	1	-22.9875	1.0624	-1.0624	1	-24.5276	-2.32965	2.32965	0.262239
SUT618	NA	-19.7657	-1.62024	1.62024	0.0296838	-18.5	-0.732399	0.732399	0.0870787	-18.766	0.0465019	-0.0465019	0.902314	-19.3577	2.32206	-2.32206	0.000260783	-19.5867	1.55217	-1.55217	0.0143799
SUT619	NA	-23.397	1.6423	-1.6423	0.371053	-24.6365	1.06057	-1.06057	1	-23.3113	-1.34338	1.34338	0.264687	-23.876	-2.71456	2.71456	0.117339	-22.5166	-0.3076	0.3076	0.754817
SUT620	NA	-22.1946	0.407601	-0.407601	0.812342	-22.0824	-0.454598	0.454598	0.706605	-22.3312	0.290231	-0.290231	0.846466	-21.9262	0.0151171	-0.0151171	1	-22.1415	-0.727254	0.727254	0.575908
SUT621	NA	-20.3248	-0.162088	0.162088	1	-20.588	0.928144	-0.928144	0.140374	-20.1321	0.2625	-0.2625	0.630034	-20.7363	-0.775036	0.775036	0.299105	-20.2343	-0.0829023	0.0829023	0.904441
SUT622	NA	-20.3722	-1.76337	1.76337	0.0388282	-19.4603	0.140434	-0.140434	0.794012	-19.4614	0.389419	-0.389419	0.375635	-20.3977	1.59814	-1.59814	0.0393539	-20.3568	1.36814	-1.36814	0.0786393
SUT623	NA	-36.3858	-27.2605	27.2605	0.221984	-23.4171	1.537	-1.537	0.209224	-22.9338	0.816974	-0.816974	0.615986	-37.1314	25.7694	-25.7694	1	-36.6914	26.6494	-26.6494	0.322673
SUT624	NA	-19.2127	-1.80739	1.80739	0.0120055	-18.4744	0.542664	-0.542664	0.197358	-18.138	0.116571	-0.116571	0.803667	-19.4355	1.24769	-1.24769	0.0413501	-19.0604	1.68589	-1.68589	0.0028529
SUT625	ST1754	-35.4136	-29.2049	29.2049	0.00932655	-20.4405	-0.538473	0.538473	0.330854	-20.5574	-0.057969	0.057969	1	-35.126	29.7801	-29.7801	0.00139891	-35.2876	29.4569	-29.4569	0.00132198
SUT626	NA	-22.3663	-2.41903	2.41903	0.147437	-21.1592	0.223504	-0.223504	0.801615	-20.858	-0.132449	0.132449	0.920667	-22.4266	2.18437	-2.18437	0.210622	-22.0852	2.5552	-2.5552	0.0625699
SUT627	ST1762	-18.574	-2.83365	2.83365	4.68052e-05	-17.2686	0.433558	-0.433558	0.26521	-16.8258	-0.205624	0.205624	0.587238	-18.742	2.38365	-2.38365	1.82799e-05	-18.2598	3.03617	-3.03617	2.19871e-08
SUT628	NA	-18.8044	-0.898908	0.898908	0.189549	-18.1586	-0.196175	0.196175	0.652276	-18.1066	-0.0534962	0.0534962	0.918994	-18.659	1.07554	-1.07554	0.0489405	-18.5698	0.942211	-0.942211	0.0727419
SUT629	ST1765	-21.8892	-3.37319	3.37319	0.00738146	-20.159	0.124448	-0.124448	0.878432	-19.7562	-0.434384	0.434384	0.373725	-21.9019	3.23363	-3.23363	0.00859178	-21.4553	3.81495	-3.81495	0.00035583
SUT630	ST1771	-19.8807	-2.74644	2.74644	0.000948859	-18.7683	0.717337	-0.717337	0.0886025	-18.5774	0.58222	-0.58222	0.158291	-20.1915	2.01063	-2.01063	0.00595932	-19.9643	2.15312	-2.15312	0.00227067
SUT631	NA	-20.6453	-1.86105	1.86105	0.0368317	-19.4988	-0.262251	0.262251	0.633593	-19.255	-0.502818	0.502818	0.290483	-20.4735	2.09047	-2.09047	0.0146065	-20.1923	2.34112	-2.34112	0.00164174
SUT632	NA	-18.7358	-2.27911	2.27911	0.00105291	-17.6065	0.236703	-0.236703	0.549184	-17.358	-0.0136924	0.0136924	0.980073	-18.8033	2.03006	-2.03006	0.000307101	-18.5164	2.292	-2.292	2.13266e-05
SUT633	ST1799	-19.8261	-4.32957	4.32957	4.64189e-07	-17.7342	0.374371	-0.374371	0.348523	-17.5084	0.169174	-0.169174	0.678855	-19.9594	3.94872	-3.94872	1.25662e-07	-19.6953	4.16505	-4.16505	6.31854e-09
SUT634	ST1813	-19.8286	-1.49433	1.49433	0.0496685	-19.3258	0.715292	-0.715292	0.144969	-19.0554	0.420812	-0.420812	0.338335	-20.138	0.761564	-0.761564	0.359216	-19.8215	1.08256	-1.08256	0.110364
SUT635	ST1819	-22.9161	-1.31938	1.31938	0.563383	-21.6214	-1.02846	1.02846	0.153375	-22.3546	0.68419	-0.68419	0.422069	-22.3428	2.35186	-2.35186	0.14872	-23.0373	0.650938	-0.650938	1
SUT636	ST1820	-36.2548	-27.5225	27.5225	0.135458	-22.9861	1.21384	-1.21384	0.428814	-22.1253	-0.261455	0.261455	0.855177	-36.8362	26.3598	-26.3598	0.564941	-36.0133	28.0056	-28.0056	0.0447101
SUT637	ST1826	-21.7446	-3.66237	3.66237	0.00263306	-19.868	0.105423	-0.105423	0.844443	-19.9279	0.472119	-0.472119	0.365287	-21.7522	3.53304	-3.53304	0.00189146	-21.78	3.16569	-3.16569	0.0102276
SUT638	NA	-36.3438	-27.3445	27.3445	0.221984	-22.2817	-0.536556	0.536556	0.668428	-23.0501	1.24633	-1.24633	0.31232	-36.0457	27.9406	-27.9406	0.0726459	-36.8556	26.321	-26.321	0.564576
SUT639	NA	-22.4523	-2.24698	2.24698	0.106968	-20.5308	-1.41446	1.41446	0.0121706	-20.5023	-1.22436	1.22436	0.0221334	-21.6999	3.63758	-3.63758	0.00154556	-21.6422	3.4412	-3.4412	0.00305847
SUT640	NA	-20.3737	0.239736	-0.239736	0.758373	-20.4698	0.145563	-0.145563	0.85861	-20.3515	0.155815	-0.155815	0.820672	-20.4063	-0.418979	0.418979	0.466971	-20.2517	-0.42161	0.42161	0.54083
SUT641	ST1845,ST1846	-20.2223	-3.53715	3.53715	6.46311e-05	-18.2461	-0.213293	0.213293	0.617236	-18.0861	-0.286776	0.286776	0.48461	-20.0687	3.73022	-3.73022	9.88319e-07	-19.8701	3.81549	-3.81549	1.13028e-07
SUT642	ST1852	-20.7413	-1.66903	1.66903	0.070154	-19.6707	-0.278276	0.278276	0.598246	-19.5836	-0.205602	0.205602	0.690507	-20.5571	1.92329	-1.92329	0.0157638	-20.4319	1.86185	-1.86185	0.0165131
SUT643	NA	-18.0284	1.12229	-1.12229	0.0286874	-18.2973	-0.37921	0.37921	0.366997	-18.039	-0.649372	0.649372	0.10989	-17.7925	-0.764597	0.764597	0.0672256	-17.4923	-0.476021	0.476021	0.218017
SUT644	NA	-19.9254	-4.13097	4.13097	1.57358e-06	-17.7822	0.0493587	-0.0493587	0.91095	-17.6899	0.111252	-0.111252	0.779917	-19.9021	4.06338	-4.06338	4.1937e-08	-19.7714	4.01292	-4.01292	1.49286e-08
SUT645	NA	-21.8111	-1.5294	1.5294	0.187108	-21.4086	0.893121	-0.893121	0.171995	-21.0284	0.380146	-0.380146	0.520696	-22.2187	0.60008	-0.60008	1	-21.8006	1.12437	-1.12437	0.400066
SUT646	NA	-17.3531	-0.356544	0.356544	0.597134	-17.0572	-0.0238961	0.0238961	0.953735	-17.1902	0.488622	-0.488622	0.20107	-17.2922	0.3643	-0.3643	0.447448	-17.3855	-0.134249	0.134249	0.700031
SUT647	ST1886	-22.1108	-0.930038	0.930038	0.671345	-21.0415	-0.981755	0.981755	0.0955683	-21.541	0.263616	-0.263616	0.778716	-21.5705	1.89644	-1.89644	0.0605104	-22.0284	0.668729	-0.668729	0.637798
SUT648	NA	-22.003	-3.14568	3.14568	0.0205151	-20.5442	0.440175	-0.440175	0.51717	-20.4379	0.474158	-0.474158	0.425294	-22.1754	2.68667	-2.68667	0.0558355	-22.0333	2.65903	-2.65903	0.0335461
SUT649	NA	-36.7959	26.4402	-26.4402	0.333333	-50.0161	0	0	1	-50.0161	0	0	1	-36.7674	-26.4973	26.4973	0.333333	-36.6894	-26.6532	26.6532	0.333333
SUT650	NA	-15.9762	-1.55876	1.55876	0.00842835	-15.2641	0.350963	-0.350963	0.342758	-14.8906	-0.149395	0.149395	0.684117	-16.1011	1.19491	-1.19491	0.0050616	-15.6888	1.70768	-1.70768	5.27902e-05
SUT651	ST1908	-18.0038	-1.63433	1.63433	0.0110435	-17.3114	0.456597	-0.456597	0.241046	-17.1236	0.327595	-0.327595	0.399655	-18.1835	1.16066	-1.16066	0.0213094	-17.9573	1.30134	-1.30134	0.00705208
SUT652	ST1909	-21.267	-2.6177	2.6177	0.0174972	-19.775	-0.172453	0.172453	0.755574	-19.5621	-0.351536	0.351536	0.490875	-21.1353	2.76682	-2.76682	0.00514874	-20.8855	2.95455	-2.95455	0.000916817
SUT653	NA	-20.8015	-0.904847	0.904847	0.360097	-19.946	-0.572938	0.572938	0.247098	-20.1271	0.0356961	-0.0356961	1	-20.4619	1.46984	-1.46984	0.0699228	-20.6034	0.874889	-0.874889	0.31162
SUT654	NA	-21.3912	-1.19937	1.19937	0.260774	-20.6462	-0.0961981	0.0961981	1	-20.3872	-0.367456	0.367456	0.532618	-21.2914	1.28469	-1.28469	0.276412	-20.9991	1.55754	-1.55754	0.102979
SUT655	ST1912,ST1913	-19.4155	-1.40167	1.40167	0.0652354	-18.9692	0.73039	-0.73039	0.098131	-18.5931	0.224744	-0.224744	0.59995	-19.7277	0.663246	-0.663246	0.388423	-19.315	1.17671	-1.17671	0.0448239
SUT656	ST1913	-22.2344	0.487055	-0.487055	0.597509	-22.1061	-0.523313	0.523313	0.560087	-22.3079	0.126861	-0.126861	1	-21.9222	0.0231567	-0.0231567	1	-22.0827	-0.609706	0.609706	0.575908
SUT657	NA	-20.0673	-0.372252	0.372252	0.745572	-19.8372	0.121724	-0.121724	0.847003	-19.6451	-0.0158198	0.0158198	1	-20.0785	0.235752	-0.235752	0.811611	-19.8526	0.375584	-0.375584	0.640797
SUT658	NA	-18.3138	0.0468768	-0.0468768	0.835222	-18.2079	-0.031705	0.031705	0.941223	-17.8398	-0.521478	0.521478	0.184102	-18.244	-0.0213506	0.0213506	0.890089	-17.8372	0.480475	-0.480475	0.329725
SUT659	ST1944,ST1945	-19.4547	1.47371	-1.47371	0.0138339	-20.0453	-0.0967428	0.0967428	0.885267	-19.9292	-0.0820888	0.0820888	0.951281	-19.3649	-1.40826	1.40826	0.00646923	-19.2015	-1.39342	1.39342	0.00344821
SUT660	ST1949	-50.0161	0	0	1	-50.0161	0	0	1	-37.0569	-25.9183	25.9183	0.261612	-50.0161	0	0	1	-37.0664	25.8992	-25.8992	1
SUT661	NA	-19.4618	-1.05814	1.05814	0.162687	-18.9091	0.176122	-0.176122	0.704832	-18.7941	0.192557	-0.192557	0.68396	-19.4968	0.874016	-0.874016	0.158512	-19.3445	0.866789	-0.866789	0.162697
SUT662	NA	-22.9227	-1.30628	1.30628	0.575362	-22.393	0.429328	-0.429328	0.668428	-21.9799	-0.149549	0.149549	0.86958	-23.0929	0.851703	-0.851703	1	-22.6531	1.41947	-1.41947	0.282362
SUT663	NA	-21.1038	-0.300079	0.300079	0.888566	-20.5335	-0.63989	0.63989	0.307353	-20.7298	-0.000386448	0.000386448	1	-20.7338	0.926098	-0.926098	0.286128	-20.8946	0.29258	-0.29258	1
SUT664	ST1987	-21.1299	-0.247983	0.247983	0.886769	-21.1351	0.482271	-0.482271	0.449771	-20.8036	0.0657413	-0.0657413	1	-21.3175	-0.241466	0.241466	0.829747	-20.9519	0.177969	-0.177969	0.87153
SUT665	ST1990	-17.2746	0.041478	-0.041478	0.844604	-17.1842	-0.00836202	0.00836202	0.98992	-17.0075	-0.115216	0.115216	0.766348	-17.2204	-0.0470802	0.0470802	0.84357	-17.0047	0.0724494	-0.0724494	0.941337
SUT666	ST1992	-18.6909	-0.599816	0.599816	0.408016	-18.2154	-0.134657	0.134657	0.749247	-18.1241	-0.0706079	0.0706079	0.869062	-18.5734	0.720669	-0.720669	0.171179	-18.4427	0.670244	-0.670244	0.200315
SUT667	ST1992	-22.0865	0.19132	-0.19132	0.812342	-21.8457	-0.470086	0.470086	0.603226	-22.4061	0.897426	-0.897426	0.329802	-21.8018	0.263951	-0.263951	1	-22.3287	-1.10168	1.10168	0.345819
SUT668	NA	-23.1237	-0.904253	0.904253	1	-22.4353	-0.229515	0.229515	0.824462	-23.2461	1.63827	-1.63827	0.182474	-22.9578	1.12187	-1.12187	0.743156	-23.7285	-0.73129	0.73129	0.675348
SUT669	ST2004	-36.1813	-27.6695	27.6695	0.0851333	-22.709	0.948263	-0.948263	0.469772	-22.6136	1.00383	-1.00383	0.263084	-36.6305	26.7711	-26.7711	0.564941	-36.5728	26.8866	-26.8866	0.322673
SUT670	NA	-15.866	-1.20249	1.20249	0.0405014	-15.4293	0.547615	-0.547615	0.137894	-15.1935	0.32255	-0.32255	0.383114	-16.0885	0.64343	-0.64343	0.130067	-15.814	0.880663	-0.880663	0.0330102
SUT671	NA	-20.1479	-1.68582	1.68582	0.0403784	-19.0813	-0.233385	0.233385	0.642925	-18.8678	-0.413852	0.413852	0.328409	-19.978	1.91153	-1.91153	0.00481861	-19.7291	2.09755	-2.09755	0.00181244
SUT672	ST2009,ST2010	-20.1082	-1.32055	1.32055	0.0997547	-19.3449	-0.0256525	0.0256525	1	-19.3016	0.13468	-0.13468	0.766307	-20.0544	1.31403	-1.31403	0.0685975	-19.9712	1.1686	-1.1686	0.112109
SUT673	NA	-22.8078	0.464005	-0.464005	0.744093	-23.0435	0.254608	-0.254608	1	-22.8458	0.105248	-0.105248	1	-22.8774	-0.717279	0.717279	0.421203	-22.6369	-0.54817	0.54817	0.735978
SUT674	ST2019	-18.2559	0.0752085	-0.0752085	0.818695	-18.1777	-0.0377803	0.0377803	0.961627	-18.1697	0.19296	-0.19296	0.64313	-18.1905	-0.0586778	0.0586778	0.822347	-18.1461	-0.281758	0.281758	0.507213
SUT675	ST2021	-21.1178	0.253935	-0.253935	0.764256	-20.9536	-0.378571	0.378571	0.562954	-21.0114	-0.0161407	0.0161407	1	-20.8829	0.101707	-0.101707	1	-20.8979	-0.240129	0.240129	0.620493
SUT676	ST2025	-20.6457	-2.69021	2.69021	0.00484526	-19.2232	0.063157	-0.063157	0.963688	-19.3623	0.587751	-0.587751	0.187446	-20.6271	2.61333	-2.61333	0.00144124	-20.7253	2.1051	-2.1051	0.0171569
SUT677	NA	-20.0516	-0.708505	0.708505	0.394201	-19.5331	-0.118091	0.118091	0.826546	-19.6136	0.289508	-0.289508	0.539567	-19.9435	0.810683	-0.810683	0.250635	-19.9846	0.416508	-0.416508	0.61709
SUT678	NA	-18.7821	0.412569	-0.412569	0.405332	-18.8187	-0.11386	0.11386	0.801205	-18.7536	0.00237505	-0.00237505	1	-18.6691	-0.300644	0.300644	0.466159	-18.5689	-0.412263	0.412263	0.359533
SUT679	ST2074	-20.9258	-3.30005	3.30005	0.00102222	-18.8815	-0.58925	0.58925	0.1721	-18.6861	-0.733405	0.733405	0.0798074	-20.5863	3.86481	-3.86481	3.51802e-06	-20.3528	4.02011	-4.02011	6.77096e-07
SUT680	ST2078	-50.0161	0	0	1	-50.0161	0	0	1	-50.0161	0	0	1	-50.0161	0	0	1	-50.0161	0	0	1
SUT681	ST2079	-18.6422	-1.22339	1.22339	0.0639479	-18.0383	0.204974	-0.204974	0.614606	-17.7992	-0.026437	0.026437	0.946977	-18.7004	0.992836	-0.992836	0.074391	-18.4242	1.23333	-1.23333	0.0175696
SUT682	ST2081	-21.9421	-0.097573	0.097573	1	-21.4407	-0.685451	0.685451	0.312188	-21.9561	0.591766	-0.591766	0.499483	-21.5468	0.774023	-0.774023	0.50585	-22.0207	-0.485683	0.485683	0.575908
SUT683	NA	-21.6299	-3.89185	3.89185	0.000929137	-19.6611	0.174773	-0.174773	0.723548	-19.6631	0.425183	-0.425183	0.374506	-21.6631	3.71127	-3.71127	0.000825865	-21.6286	3.46835	-3.46835	0.00305847
SUT684	NA	-19.1924	-0.953036	0.953036	0.181659	-18.7451	0.254327	-0.254327	0.540511	-18.6551	0.320964	-0.320964	0.439353	-19.273	0.677693	-0.677693	0.254494	-19.1459	0.61998	-0.61998	0.292005
SUT685	NA	-19.8643	-2.77924	2.77924	0.000779488	-18.5912	0.441073	-0.441073	0.293182	-18.2911	0.0873558	-0.0873558	0.854832	-20.0348	2.3241	-2.3241	0.00110031	-19.6979	2.68601	-2.68601	8.33484e-05
SUT686	ST2140	-17.9195	-0.972853	0.972853	0.1249	-17.3353	0.0143105	-0.0143105	0.977682	-17.3134	0.217032	-0.217032	0.577097	-17.8769	0.943823	-0.943823	0.0513683	-17.817	0.751743	-0.751743	0.111151
SUT687	NA	-18.9196	-0.393515	0.393515	0.623032	-18.461	-0.325776	0.325776	0.456751	-18.5565	0.111868	-0.111868	0.829484	-18.709	0.700617	-0.700617	0.204527	-18.7699	0.266872	-0.266872	0.636135
SUT688	ST2171	-19.8655	0.919287	-0.919287	0.138553	-20.039	-0.348709	0.348709	0.511384	-19.9305	-0.31932	0.31932	0.500712	-19.6378	-0.578	0.578	0.29656	-19.49	-0.594303	0.594303	0.227812
SUT689	ST2197,ST2198	-36.1362	-27.7596	27.7596	0.0552824	-22.3599	0.448607	-0.448607	0.824462	-21.663	-0.698959	0.698959	0.377597	-36.3329	27.3662	-27.3662	0.192139	-35.6717	28.6886	-28.6886	0.0483076
SUT690	ST2198	-35.7184	-28.5953	28.5953	0.0675844	-21.9442	1.3035	-1.3035	0.113588	-21.3409	0.342842	-0.342842	0.701535	-36.3372	27.3576	-27.3576	0.192139	-35.7737	28.4847	-28.4847	0.0655284
SUT691	NA	-37.3953	-25.2415	25.2415	1	-24.4284	-0.48555	0.48555	1	-37.2819	25.4683	-25.4683	0.507742	-37.1314	25.7694	-25.7694	1	-50.0161	0	0	1
SUT692	ST2200	-19.8843	-0.464169	0.464169	0.618416	-19.4414	-0.249605	0.249605	0.682009	-19.2879	-0.309563	0.309563	0.558196	-19.7184	0.681881	-0.681881	0.343414	-19.5281	0.750523	-0.750523	0.26183
SUT693	ST2203,ST2204	-20.699	-2.58371	2.58371	0.0063001	-18.8666	-0.871813	0.871813	0.0434334	-18.9548	-0.448741	0.448741	0.303662	-20.2143	3.43893	-3.43893	1.04729e-05	-20.2643	3.02711	-3.02711	0.000125045
SUT694	ST2204,ST2205,ST2206	-19.1408	1.62585	-1.62585	0.0034464	-19.4114	-0.845793	0.845793	0.0628814	-20.1082	0.794057	-0.794057	0.110359	-18.6615	-0.781283	0.781283	0.081659	-19.3202	-2.41055	2.41055	1.22324e-06
SUT695	NA	-35.9175	-28.197	28.197	0.0262834	-21.3829	-0.643228	0.643228	0.39689	-21.0853	-0.992095	0.992095	0.0992823	-35.5736	28.885	-28.885	0.00863981	-35.3126	29.4068	-29.4068	0.00270927
SUT696	NA	-21.5431	0.578504	-0.578504	0.55278	-21.4784	-0.472305	0.472305	0.556852	-21.405	-0.372966	0.372966	0.602541	-21.2545	-0.115326	0.115326	0.836936	-21.1397	-0.197557	0.197557	0.855185
SUT697	NA	-20.2669	-0.277936	0.277936	0.854287	-19.9221	-0.205979	0.205979	0.734894	-19.5263	-0.750944	0.750944	0.0958382	-20.1158	0.465962	-0.465962	0.633217	-19.6839	1.018	-1.018	0.102053
SUT698	ST2286	-21.2723	0.0369072	-0.0369072	0.873973	-21.0088	-0.338847	0.338847	0.638347	-20.8374	-0.435054	0.435054	0.430428	-21.0515	0.290601	-0.290601	0.853057	-20.8415	0.398742	-0.398742	0.766804
SUT699	ST2290	-21.3402	-0.471246	0.471246	0.750975	-20.5863	-0.815983	0.815983	0.151527	-20.6939	-0.354397	0.354397	0.517993	-20.8802	1.27699	-1.27699	0.167936	-20.9524	0.820798	-0.820798	0.370446
SUT700	NA	-35.8566	-28.319	28.319	0.0176816	-21.7285	0.274486	-0.274486	0.869427	-21.6863	0.43668	-0.43668	0.452989	-35.9714	28.0894	-28.0894	0.0726459	-35.9662	28.0997	-28.0997	0.0498917
SUT701	ST2300	-19.6764	-2.18411	2.18411	0.00496006	-18.401	-0.16007	0.16007	0.718995	-18.4474	0.179413	-0.179413	0.667149	-19.5475	2.32781	-2.32781	0.000256216	-19.5546	2.00177	-2.00177	0.00202207
SUT702	ST2303,ST2305	-19.9841	0.431331	-0.431331	0.504102	-19.6188	-0.987247	0.987247	0.0449406	-19.6531	-0.671618	0.671618	0.167558	-19.4506	0.521612	-0.521612	0.448789	-19.4471	0.216769	-0.216769	0.757744
SUT703	NA	-19.7615	-2.45877	2.45877	0.00170362	-18.568	0.288431	-0.288431	0.500848	-18.2875	-0.0259528	0.0259528	0.963523	-19.8551	2.15732	-2.15732	0.0018398	-19.536	2.48378	-2.48378	9.58758e-05
SUT704	NA	-22.1935	-2.76466	2.76466	0.0576069	-20.6265	-0.166641	0.166641	0.843878	-20.5163	-0.140194	0.140194	0.868155	-22.0618	2.91391	-2.91391	0.0303891	-21.9197	2.8863	-2.8863	0.0142984
SUT705	NA	-36.3358	-27.3605	27.3605	0.135458	-22.0087	-1.05925	1.05925	0.195894	-22.1476	-0.535262	0.535262	0.583316	-35.7791	28.474	-28.474	0.0303834	-35.9569	28.1183	-28.1183	0.0498917
SUT706	NA	-22.2624	-2.62688	2.62688	0.0946544	-20.7599	-0.157013	0.157013	0.915991	-20.2148	-1.0007	1.0007	0.0372622	-22.1291	2.77928	-2.77928	0.0397389	-21.5582	3.60916	-3.60916	0.000895918
SUT707	ST2342	-18.183	-2.97189	2.97189	1.62497e-05	-16.8221	0.474022	-0.474022	0.213348	-16.6366	0.349558	-0.349558	0.359663	-18.3672	2.48935	-2.48935	3.79153e-06	-18.143	2.62587	-2.62587	4.6782e-07
SUT708	ST2347	-20.8218	-0.338002	0.338002	0.902177	-20.5002	-0.078399	0.078399	1	-20.9738	1.11534	-1.11534	0.085939	-20.7255	0.416523	-0.416523	0.754395	-21.1715	-0.78737	0.78737	0.341417
SUT709	NA	-18.2558	-1.99622	1.99622	0.00250312	-17.2517	0.188468	-0.188468	0.635489	-16.9924	-0.0834628	0.0834628	0.837055	-18.3039	1.7858	-1.7858	0.000482495	-18.0052	2.07135	-2.07135	3.49558e-05
SUT710	NA	-20.3373	-0.477117	0.477117	0.576318	-19.608	-0.786725	0.786725	0.105823	-20.2313	0.706615	-0.706615	0.180089	-19.8976	1.2422	-1.2422	0.0692946	-20.488	-0.250344	0.250344	0.784641
SUT711	ST2404	-17.7918	-1.56801	1.56801	0.0136595	-16.8039	-0.202384	0.202384	0.60294	-16.7114	-0.140787	0.140787	0.714975	-17.6421	1.75322	-1.75322	0.000246052	-17.5113	1.70308	-1.70308	0.000273613
SUT712	NA	-19.1943	-2.7631	2.7631	0.000185211	-17.7897	0.167999	-0.167999	0.680143	-17.6134	0.061946	-0.061946	0.88259	-19.227	2.58348	-2.58348	2.85639e-05	-19.0136	2.69852	-2.69852	5.71574e-06
SUT713	ST2409	-20.0627	-1.4116	1.4116	0.0712312	-19.1096	-0.296169	0.296169	0.522465	-19.3153	0.361874	-0.361874	0.391962	-19.8676	1.68761	-1.68761	0.0140935	-20.0339	1.04308	-1.04308	0.132713
SUT714	NA	-19.0894	-0.97276	0.97276	0.179711	-18.8351	0.71372	-0.71372	0.0931796	-18.8618	1.01329	-1.01329	0.0183413	-19.3849	0.267638	-0.267638	0.73425	-19.3736	-0.0216627	0.0216627	0.938449
SUT715	ST2423	-22.725	1.46825	-1.46825	0.208484	-22.9866	-0.734636	0.734636	0.771234	-22.4517	-1.55773	1.55773	0.0745947	-22.3047	-0.741812	0.741812	0.514242	-21.736	0.0837668	-0.0837668	1
SUT716	ST2429	-19.9349	-0.942012	0.942012	0.268084	-19.0892	-0.538835	0.538835	0.22416	-19.0247	-0.421189	0.421189	0.315674	-19.6171	1.46352	-1.46352	0.0253959	-19.5167	1.35243	-1.35243	0.0316612
SUT717	ST2452	-17.7072	-0.281314	0.281314	0.714774	-17.6187	0.316402	-0.316402	0.422033	-17.3513	0.0282591	-0.0282591	0.950443	-17.815	-0.048333	0.048333	0.857712	-17.51	0.249808	-0.249808	0.619674
SUT718	NA	-50.0161	0	0	1	-50.0161	0	0	1	-50.0161	0	0	1	-50.0161	0	0	1	-50.0161	0	0	1
SUT719	NA	-21.9489	-0.0838218	0.0838218	1	-21.356	-0.875569	0.875569	0.210754	-21.7278	0.114596	-0.114596	1	-21.4589	0.949705	-0.949705	0.402172	-21.7898	-0.0239893	0.0239893	0.820512
SUT720	NA	-16.9946	-3.07366	3.07366	2.27779e-06	-15.5029	0.314493	-0.314493	0.397677	-15.2604	0.0760897	-0.0760897	0.838992	-17.0991	2.7504	-2.7504	1.23702e-08	-16.8177	3.00149	-3.00149	2.58946e-10
SUT721	NA	-19.1487	-0.854161	0.854161	0.233955	-18.5178	-0.19376	0.19376	0.655274	-18.5547	0.126588	-0.126588	0.766324	-19.0023	1.03284	-1.03284	0.0638671	-19.0004	0.724735	-0.724735	0.213293
SUT722	NA	-20.4284	-2.29479	2.29479	0.010734	-19.2733	0.190733	-0.190733	0.674647	-19.3114	0.51362	-0.51362	0.249223	-20.4773	2.08282	-2.08282	0.0116775	-20.474	1.77754	-1.77754	0.0231441
SUT723	NA	-37.4156	-25.2009	25.2009	1	-24.9399	0.480806	-0.480806	1	-24.1248	-0.90304	0.90304	0.701377	-37.6294	24.7732	-24.7732	1	-36.8556	26.321	-26.321	0.564576
SUT724	ST2501,ST2502	-19.1034	-1.54392	1.54392	0.0263731	-18.3818	0.309741	-0.309741	0.445435	-18.2023	0.197391	-0.197391	0.634071	-19.2079	1.22078	-1.22078	0.0370454	-18.9912	1.34228	-1.34228	0.0161194
SUT725	NA	-35.7085	-28.6151	28.6151	0.0477971	-21.0054	-0.575485	0.575485	0.345558	-21.0369	-0.26603	0.26603	0.744869	-35.3987	29.2348	-29.2348	0.00273307	-35.4718	29.0885	-29.0885	0.0109414
SUT726	ST2507	-19.7989	-0.909977	0.909977	0.241598	-19.2129	-0.0346727	0.0346727	0.963688	-19.3327	0.451195	-0.451195	0.321741	-19.7283	0.936988	-0.936988	0.198011	-19.8099	0.461938	-0.461938	0.526858
SUT727	NA	-22.0249	0.0680191	-0.0680191	1	-22.0692	0.219419	-0.219419	0.846317	-21.8899	0.107747	-0.107747	1	-22.0879	-0.30817	0.30817	0.774359	-21.8751	-0.194482	0.194482	1
SUT728	NA	-19.6491	-1.20959	1.20959	0.117734	-18.8767	-0.13776	0.13776	0.795736	-19.0079	0.371218	-0.371218	0.394584	-19.5321	1.32938	-1.32938	0.0399845	-19.6264	0.828893	-0.828893	0.210861
SUT729	ST2562	-20.1987	-1.58423	1.58423	0.0617442	-19.2628	-0.0962557	0.0962557	0.888789	-19.3232	0.271383	-0.271383	0.549626	-20.1052	1.65724	-1.65724	0.0165489	-20.1297	1.29634	-1.29634	0.076461
SUT730	ST2569	-21.4239	-1.13381	1.13381	0.312728	-20.6667	-0.199909	0.199909	0.843878	-20.5395	-0.207231	0.207231	0.801182	-21.2845	1.2985	-1.2985	0.217638	-21.1195	1.31673	-1.31673	0.186412
SUT731	ST2574	-50.0161	0	0	1	-50.0161	0	0	1	-50.0161	0	0	1	-50.0161	0	0	1	-50.0161	0	0	1
SUT732	NA	-19.5424	-1.14789	1.14789	0.120286	-18.8256	-0.0826191	0.0826191	0.886131	-18.5978	-0.291702	0.291702	0.489781	-19.4537	1.21122	-1.21122	0.0459053	-19.1871	1.43263	-1.43263	0.016089
SUT733	NA	-23.3772	1.60282	-1.60282	0.432676	-22.9106	-2.33596	2.33596	0.057223	-23.641	-0.628355	0.628355	1	-22.1594	0.718587	-0.718587	0.779974	-22.8593	-0.99288	0.99288	0.704837
SUT734	ST2621	-19.2617	-3.98427	3.98427	5.18137e-07	-17.3989	0.469102	-0.469102	0.23047	-17.3708	0.659479	-0.659479	0.0907984	-19.4468	3.50012	-3.50012	1.43969e-07	-19.3812	3.31945	-3.31945	2.65794e-07
SUT735	NA	-21.9134	1.8452	-1.8452	0.0454233	-21.9487	-1.53399	1.53399	0.0510928	-21.9754	-1.23456	1.23456	0.103353	-21.089	-0.31051	0.31051	0.68669	-21.0777	-0.599758	0.599758	0.454534
SUT736	NA	-19.9961	-1.54464	1.54464	0.0702887	-18.9522	-0.320369	0.320369	0.460123	-18.9658	-0.0466497	0.0466497	0.916617	-19.785	1.85284	-1.85284	0.00554679	-19.7583	1.59431	-1.59431	0.0143831
SUT737	NA	-19.8742	-1.40316	1.40316	0.0716465	-18.9836	-0.14838	0.14838	0.75027	-18.8713	-0.126554	0.126554	0.767364	-19.744	1.54953	-1.54953	0.0174697	-19.5978	1.52997	-1.52997	0.0165482
SUT738	ST2670	-21.7521	-1.64734	1.64734	0.149676	-20.4793	-0.686381	0.686381	0.209144	-20.0421	-1.31409	1.31409	0.00768442	-21.3628	2.31189	-2.31189	0.0148817	-20.883	2.95959	-2.95959	0.000916817
SUT739	ST2693,ST2694	-19.5022	-0.746254	0.746254	0.351064	-18.8315	-0.403081	0.403081	0.371442	-18.2687	-1.28186	1.28186	0.00176722	-19.2556	1.12535	-1.12535	0.0593472	-18.654	2.01682	-2.01682	0.000226818
SUT740	NA	-21.6632	1.78943	-1.78943	0.0562174	-21.9266	-1.08142	1.08142	0.221516	-22.0023	-0.682871	0.682871	0.409755	-21.0786	-0.734371	0.734371	0.303572	-21.1202	-1.12952	1.12952	0.13378
SUT741	ST2715	-50.0161	0	0	1	-50.0161	0	0	1	-50.0161	0	0	1	-50.0161	0	0	1	-50.0161	0	0	1
SUT742	NA	-21.2435	-1.49465	1.49465	0.161158	-20.8849	1.00198	-1.00198	0.0822294	-20.2393	-0.042852	0.042852	0.942074	-21.6898	0.488022	-0.488022	0.805821	-21.0077	1.54028	-1.54028	0.128454
SUT743	NA	-18.131	-2.10498	2.10498	0.00141032	-17.0413	0.133474	-0.133474	0.739314	-16.8423	-0.0179556	0.0179556	0.971721	-18.1495	1.95385	-1.95385	0.000136875	-17.9113	2.11845	-2.11845	2.01873e-05
SUT744	NA	-20.1146	-0.922352	0.922352	0.282825	-19.7214	0.359895	-0.359895	0.50637	-19.3979	-0.0407822	0.0407822	0.892896	-20.2441	0.549253	-0.549253	0.452605	-19.8846	0.956336	-0.956336	0.138973
SUT745	NA	-18.2771	-0.257555	0.257555	0.758763	-17.9892	-0.102541	0.102541	0.797828	-17.7891	-0.25618	0.25618	0.518659	-18.1759	0.345813	-0.345813	0.498257	-17.9358	0.514265	-0.514265	0.287181
SUT746	NA	-18.7336	-2.51453	2.51453	0.000328066	-17.6283	0.527371	-0.527371	0.180692	-17.3607	0.238653	-0.238653	0.548298	-18.9442	1.97918	-1.97918	0.000512159	-18.6386	2.27854	-2.27854	3.08831e-05
SUT747	ST2806	-17.6454	0.438671	-0.438671	0.346109	-17.6035	-0.321287	0.321287	0.425923	-17.6346	-0.0124979	0.0124979	0.988062	-17.4375	-0.137043	0.137043	0.688716	-17.4306	-0.435136	0.435136	0.261119
SUT748	NA	-35.3117	-29.4087	29.4087	0.0029662	-20.439	-0.145857	0.145857	0.85861	-20.5226	0.268311	-0.268311	0.73979	-35.2232	29.5857	-29.5857	0.00415315	-35.3525	29.3272	-29.3272	0.00270927
SUT749	NA	-20.3802	-1.74736	1.74736	0.0442471	-19.2069	-0.386502	0.386502	0.41394	-19.3629	0.172007	-0.172007	0.758683	-20.1345	2.12466	-2.12466	0.00347117	-20.2578	1.5661	-1.5661	0.0349291
SUT750	ST2885,ST2886	-19.7997	-0.382208	0.382208	0.626924	-19.5855	0.147761	-0.147761	0.735127	-19.2057	-0.365115	0.365115	0.426557	-19.8257	0.216166	-0.216166	0.915038	-19.4112	0.73333	-0.73333	0.203886
SUT751	ST2908	-21.9478	-3.25604	3.25604	0.0144164	-20.5393	0.634573	-0.634573	0.270953	-20.0701	-0.0571114	0.0571114	1	-22.2193	2.59883	-2.59883	0.079176	-21.7135	3.29856	-3.29856	0.00634048
SUT752	ST2911	-21.3119	0.64212	-0.64212	0.386944	-21.4348	-0.175769	0.175769	0.88585	-21.2128	-0.373259	0.373259	0.550709	-21.1747	-0.481938	0.481938	0.536897	-20.9128	-0.269838	0.269838	0.620493
SUT753	NA	-18.9056	-1.52659	1.52659	0.0281255	-17.9131	-0.258552	0.258552	0.530505	-17.9549	0.071644	-0.071644	0.868142	-18.7295	1.76468	-1.76468	0.00104021	-18.7322	1.44741	-1.44741	0.00721177
SUT754	NA	-19.8569	-1.43781	1.43781	0.0647774	-19.2833	0.540511	-0.540511	0.241273	-19.0957	0.411501	-0.411501	0.386134	-20.0666	0.904356	-0.904356	0.270668	-19.8419	1.0419	-1.0419	0.107657
SUT755	ST2949	-37.9117	-24.2087	24.2087	1	-37.8549	24.3222	-24.3222	1	-24.8179	-1.50538	1.50538	0.636351	-50.0161	0	0	1	-37.0551	25.922	-25.922	0.564576
SUT756	NA	-20.7212	-1.06544	1.06544	0.264495	-20.0412	-0.136372	0.136372	0.887372	-19.732	-0.507422	0.507422	0.336991	-20.6196	1.15452	-1.15452	0.219046	-20.2732	1.53531	-1.53531	0.0417857
SUT757	NA	-18.6141	-0.635759	0.635759	0.356569	-18.6017	0.830653	-0.830653	0.0506282	-18.2888	0.451338	-0.451338	0.264258	-18.9796	-0.209344	0.209344	0.669019	-18.6239	0.190168	-0.190168	0.767231
SUT758	NA	-22.1457	0.30969	-0.30969	0.812342	-21.8251	-0.751907	0.751907	0.308739	-22.7177	1.28006	-1.28006	0.193861	-21.7265	0.414655	-0.414655	0.805821	-22.5777	-1.59974	1.59974	0.145903
SUT759	ST2968	-19.1548	-0.502189	0.502189	0.513388	-18.7427	-0.100204	0.100204	0.811309	-18.4414	-0.45645	0.45645	0.261952	-19.0554	0.586806	-0.586806	0.315557	-18.7136	0.958519	-0.958519	0.0710925
SUT760	ST2969	-18.0363	-0.435166	0.435166	0.527574	-17.8359	0.25003	-0.25003	0.550633	-17.6467	0.117988	-0.117988	0.762493	-18.1123	0.169101	-0.169101	0.803462	-17.882	0.317737	-0.317737	0.533726
SUT761	ST2971	-18.7241	-1.20762	1.20762	0.0790296	-17.8699	-0.298856	0.298856	0.465092	-17.7101	-0.371813	0.371813	0.355401	-18.5275	1.48671	-1.48671	0.00519289	-18.3289	1.57192	-1.57192	0.0019907
SUT762	ST2971	-21.5297	-0.922391	0.922391	0.439161	-21.0758	0.193285	-0.193285	0.808217	-20.6804	-0.350314	0.350314	0.652593	-21.5854	0.696757	-0.696757	0.50585	-21.1516	1.25241	-1.25241	0.282999
SUT763	ST2978	-20.7681	-1.61544	1.61544	0.0782154	-20.002	0.324584	-0.324584	0.570533	-19.7638	0.094351	-0.094351	0.910481	-20.8744	1.2886	-1.2886	0.167936	-20.5972	1.53123	-1.53123	0.0690789
SUT764	ST2980	-19.3308	-0.150206	0.150206	0.956558	-18.882	-0.518684	0.518684	0.219631	-18.7183	-0.599835	0.599835	0.145919	-19.0176	0.66239	-0.66239	0.265801	-18.8157	0.754319	-0.754319	0.172837
SUT765	ST2982	-19.3576	-0.436356	0.436356	0.557987	-19.0454	0.0167771	-0.0167771	0.967115	-19.231	0.63456	-0.63456	0.159662	-19.3143	0.408957	-0.408957	0.63098	-19.4677	-0.209734	0.209734	0.683059
SUT766	NA	-20.4154	2.01905	-2.01905	0.00277205	-20.9471	-0.72866	0.72866	0.252468	-20.3227	-1.73116	1.73116	0.000625504	-19.9985	-1.29942	1.29942	0.0220279	-19.3342	-0.282649	0.282649	0.588478
SUT767	NA	-35.8052	-28.4216	28.4216	0.0613889	-21.2474	-0.492377	0.492377	0.506192	-21.1998	-0.340682	0.340682	0.638896	-35.5411	28.95	-28.95	0.00863981	-35.5392	28.9536	-28.9536	0.0164038
SUT768	NA	-18.3184	-0.339878	0.339878	0.671155	-18.0436	-0.00609934	0.00609934	1	-17.9839	0.121096	-0.121096	0.764093	-18.2681	0.326442	-0.326442	0.529259	-18.1691	0.212425	-0.212425	0.735801
SUT769	NA	-21.5706	-2.01051	2.01051	0.0895564	-19.9551	-1.07568	1.07568	0.0539968	-20.2078	-0.322735	0.322735	0.578441	-20.9952	3.04711	-3.04711	0.00126794	-21.2214	2.2828	-2.2828	0.0162861
SUT770	ST3088,ST3089	-19.6631	0.349465	-0.349465	0.577481	-19.7194	-0.0495723	0.0495723	1	-19.8689	0.496248	-0.496248	0.319349	-19.5941	-0.325628	0.325628	0.54723	-19.7064	-0.862195	0.862195	0.115984
SUT771	ST3090	-36.511	-27.0101	27.0101	0.205111	-22.5464	-0.690635	0.690635	0.469772	-22.6364	-0.264248	0.264248	0.824605	-36.1373	27.7576	-27.7576	0.206438	-36.2708	27.4905	-27.4905	0.120129
SUT772	NA	-17.0174	-1.88737	1.88737	0.00219835	-15.9406	-0.0681802	0.0681802	0.860535	-15.7209	-0.260965	0.260965	0.483967	-16.9371	1.93384	-1.93384	2.51124e-05	-16.6782	2.13982	-2.13982	2.02385e-06
SUT773	ST3095	-19.9859	-0.839953	0.839953	0.347688	-19.3241	-0.243701	0.243701	0.594525	-19.403	0.160404	-0.160404	0.750546	-19.8086	1.08033	-1.08033	0.108634	-19.8447	0.696389	-0.696389	0.370546
SUT774	ST3096	-21.44	-2.27158	2.27158	0.0524823	-20.3104	0.240185	-0.240185	0.739261	-20.1535	0.172766	-0.172766	0.836585	-21.5057	2.02617	-2.02617	0.0468309	-21.3148	2.09602	-2.09602	0.0313353
SUT775	ST3096	-21.5206	-0.940412	0.940412	0.524148	-20.5975	-0.709778	0.709778	0.246774	-21.2269	0.795924	-0.795924	0.200905	-21.1183	1.63105	-1.63105	0.109621	-21.7177	0.120369	-0.120369	1
SUT776	ST3106	-18.9765	-1.02379	1.02379	0.143307	-18.2966	-0.120583	0.120583	0.795248	-18.2618	0.0563738	-0.0563738	0.892715	-18.8651	1.13227	-1.13227	0.048626	-18.7914	0.967992	-0.967992	0.0725502
SUT777	NA	-19.642	-1.22368	1.22368	0.108113	-18.9423	0.0299934	-0.0299934	0.969359	-18.8198	0.0317109	-0.0317109	0.974634	-19.6084	1.17681	-1.17681	0.067144	-19.4497	1.18239	-1.18239	0.0504072
SUT778	ST3143	-36.8943	-26.2434	26.2434	0.572849	-23.9146	0.489556	-0.489556	1	-23.6099	0.126808	-0.126808	1	-37.122	25.7881	-25.7881	1	-36.8556	26.321	-26.321	0.564576
SUT779	NA	-18.5041	-1.49957	1.49957	0.0248278	-17.6214	-0.0615439	0.0615439	0.892917	-17.7587	0.459779	-0.459779	0.246177	-18.4258	1.54196	-1.54196	0.00286926	-18.5252	1.03131	-1.03131	0.045017
SUT780	NA	-21.0243	-1.93308	1.93308	0.0450263	-20.4384	0.920984	-0.920984	0.0731632	-19.7396	-0.229314	0.229314	0.666246	-21.4465	0.974456	-0.974456	0.544848	-20.7195	2.11667	-2.11667	0.014664
SUT781	ST3164	-36.7649	-26.5023	26.5023	0.335543	-36.7044	26.6233	-26.6233	0.136607	-23.6837	0.828133	-0.828133	0.742407	-50.0161	0	0	1	-37.0664	25.8992	-25.8992	1
SUT782	NA	-20.5803	-1.3471	1.3471	0.142267	-19.3209	-0.977908	0.977908	0.0347773	-19.6498	-0.0731746	0.0731746	0.958475	-20.0484	2.29689	-2.29689	0.0010083	-20.3367	1.40844	-1.40844	0.0660633
SUT783	ST3206	-20.4514	-2.24877	2.24877	0.013931	-19.6885	0.911576	-0.911576	0.0480929	-19.1758	0.132822	-0.132822	0.845135	-20.8586	1.32023	-1.32023	0.167936	-20.3195	2.08662	-2.08662	0.00626856
SUT784	ST3207	-21.4189	-1.14398	1.14398	0.312728	-20.7037	-0.109846	0.109846	1	-20.4977	-0.274814	0.274814	0.681251	-21.3236	1.22044	-1.22044	0.276412	-21.0847	1.38631	-1.38631	0.153898
SUT785	NA	-19.7145	-1.07878	1.07878	0.17311	-19.235	0.336223	-0.336223	0.493844	-19.2689	0.650558	-0.650558	0.137409	-19.8331	0.727466	-0.727466	0.268732	-19.827	0.427776	-0.427776	0.579986
SUT786	NA	-34.5248	-30.9826	30.9826	1.68576e-06	-18.9234	-0.0174921	0.0174921	1	-18.8322	0.0467726	-0.0467726	0.923386	-34.498	31.0361	-31.0361	6.37348e-07	-34.4465	31.1391	-31.1391	1.04809e-07
SUT787	ST3214	-50.0161	0	0	1	-50.0161	0	0	1	-50.0161	0	0	1	-50.0161	0	0	1	-50.0161	0	0	1
SUT788	ST3237	-20.9884	0.825147	-0.825147	0.301636	-21.5231	0.459754	-0.459754	0.539234	-21.2147	0.0897104	-0.0897104	1	-21.1634	-1.28922	1.28922	0.112952	-20.824	-0.922403	0.922403	0.231342
SUT789	ST3242	-19.3937	0.279635	-0.279635	0.590944	-19.3849	-0.0751713	0.0751713	0.880295	-19.1918	-0.214974	0.214974	0.660854	-19.3037	-0.213785	0.213785	0.672271	-19.0719	-0.0620285	0.0620285	0.845241
SUT790	NA	-24.1916	3.2315	-3.2315	0.12254	-37.8549	24.3222	-24.3222	1	-23.9047	-3.33174	3.33174	0.0192675	-36.2674	-27.4973	27.4973	0.114269	-22.3083	0.109015	-0.109015	1
SUT791	ST3250	-22.1044	-0.942843	0.942843	0.671345	-21.2336	-0.578147	0.578147	0.433197	-21.3037	-0.191557	0.191557	0.801915	-21.7618	1.51386	-1.51386	0.194954	-21.7965	1.1327	-1.1327	0.400066
SUT792	NA	-20.0773	-1.38235	1.38235	0.0796366	-19.39	0.192418	-0.192418	0.651178	-19.2036	0.0665345	-0.0665345	0.904826	-20.1281	1.16663	-1.16663	0.0972671	-19.9091	1.29281	-1.29281	0.0662834
SUT793	NA	-21.2992	-1.38335	1.38335	0.186208	-20.6148	0.22246	-0.22246	0.77059	-20.3773	-0.00588179	0.00588179	1	-21.3608	1.14586	-1.14586	0.442673	-21.0844	1.38692	-1.38692	0.190881
SUT794	ST3272	-17.6043	-1.02417	1.02417	0.0981826	-17.3619	0.761176	-0.761176	0.0507587	-17.0802	0.44422	-0.44422	0.246756	-17.9328	0.252993	-0.252993	0.629752	-17.6122	0.582299	-0.582299	0.206237
SUT795	NA	-18.2855	-1.17976	1.17976	0.0686266	-17.723	0.253994	-0.253994	0.518986	-17.5639	0.182387	-0.182387	0.63758	-18.3657	0.905264	-0.905264	0.0797381	-18.1686	0.987502	-0.987502	0.045321
SUT796	NA	-19.6668	-0.00413848	0.00413848	0.946443	-19.2906	-0.579783	0.579783	0.241273	-19.2804	-0.353036	0.353036	0.455953	-19.3363	0.551152	-0.551152	0.382066	-19.2947	0.322389	-0.322389	0.577008
SUT797	NA	-18.5689	-1.51805	1.51805	0.0229128	-17.8474	0.289741	-0.289741	0.484864	-17.7964	0.43439	-0.43439	0.274238	-18.6656	1.2105	-1.2105	0.0266415	-18.5734	1.083	-1.083	0.0361422
SUT798	NA	-36.511	-27.0101	27.0101	0.205111	-22.5297	-0.724016	0.724016	0.469772	-22.7326	-0.071816	0.071816	1	-36.1248	27.7824	-27.7824	0.120799	-36.364	27.3042	-27.3042	0.205719
SUT799	ST3297	-20.0404	-1.90087	1.90087	0.0209812	-19.332	0.71349	-0.71349	0.115833	-18.8603	0.0163764	-0.0163764	1	-20.3428	1.18186	-1.18186	0.118515	-19.8328	1.89008	-1.89008	0.00706974
SUT800	ST3308	-19.3538	-1.04311	1.04311	0.161913	-18.5792	-0.317333	0.317333	0.479808	-18.674	0.118902	-0.118902	0.77099	-19.1503	1.33608	-1.33608	0.0210943	-19.2067	0.911411	-0.911411	0.124934
SUT801	ST3316	-22.6742	2.19682	-2.19682	0.100436	-23.9212	0.502723	-0.502723	0.701273	-23.6177	0.142535	-0.142535	1	-22.8781	-2.71862	2.71862	0.0534427	-22.5345	-2.34335	2.34335	0.0254404
SUT802	ST3318	-17.2729	0.109273	-0.109273	0.749735	-17.327	0.215064	-0.215064	0.589543	-17.17	0.147616	-0.147616	0.707484	-17.3313	-0.340305	0.340305	0.370033	-17.1339	-0.257263	0.257263	0.480145
SUT803	ST3321	-19.3776	-1.7526	1.7526	0.0173151	-18.6105	0.426077	-0.426077	0.30201	-18.614	0.679536	-0.679536	0.102481	-19.5391	1.31534	-1.31534	0.0399845	-19.5073	1.06716	-1.06716	0.0881732
SUT804	ST3328	-20.6184	0.42497	-0.42497	0.545794	-20.7823	0.114112	-0.114112	0.915991	-20.7335	0.263227	-0.263227	0.70875	-20.6275	-0.557396	0.557396	0.411629	-20.5395	-0.69315	0.69315	0.305183
SUT805	NA	-21.628	-1.89565	1.89565	0.0804702	-20.6226	0.123487	-0.123487	1	-19.956	-0.963416	0.963416	0.0387947	-21.6367	1.76411	-1.76411	0.110924	-20.9279	2.86981	-2.86981	0.00167015
SUT806	ST3355	-50.0161	0	0	1	-50.0161	0	0	1	-50.0161	0	0	1	-50.0161	0	0	1	-50.0161	0	0	1
SUT807	ST3355,ST3356	-18.9447	-0.215056	0.215056	0.830412	-18.7777	0.100133	-0.100133	0.834344	-18.5847	-0.0394226	0.0394226	0.955867	-18.9448	0.100806	-0.100806	0.946342	-18.7101	0.258248	-0.258248	0.719133
SUT808	NA	-35.5711	-28.8898	28.8898	0.0282106	-20.9425	-0.1372	0.1372	0.908046	-20.6236	-0.52859	0.52859	0.331833	-35.4748	29.0825	-29.0825	0.0035211	-35.2003	29.6316	-29.6316	0.000731108
SUT809	NA	-35.0998	-29.8325	29.8325	0.00064935	-19.6654	-0.820346	0.820346	0.0908464	-19.6044	-0.695827	0.695827	0.131985	-34.6655	30.7012	-30.7012	6.97276e-06	-34.6474	30.7374	-30.7374	4.80861e-06
SUT810	ST3366	-19.9815	0.426054	-0.426054	0.446592	-19.9014	-0.354717	0.354717	0.501379	-19.9975	0.0838921	-0.0838921	0.949689	-19.7466	-0.0704526	0.0704526	0.831539	-19.8112	-0.511414	0.511414	0.366951
SUT811	ST3372	-50.0161	0	0	1	-50.0161	0	0	1	-50.0161	0	0	1	-50.0161	0	0	1	-50.0161	0	0	1
SUT812	NA	-20.1632	-0.825218	0.825218	0.340471	-19.5675	-0.176049	0.176049	0.782633	-19.4069	-0.250426	0.250426	0.621204	-20.0308	0.97597	-0.97597	0.203067	-19.8338	1.05794	-1.05794	0.110364
SUT813	ST3435	-37.9011	-24.2298	24.2298	1	-24.9193	-1.51984	1.51984	1	-24.2053	-2.70113	2.70113	0.0875949	-37.122	25.7881	-25.7881	1	-36.4478	27.1365	-27.1365	0.191544
SUT814	ST3461	-20.6567	-2.66835	2.66835	0.0044301	-19.0072	-0.437853	0.437853	0.33805	-18.9119	-0.381793	0.381793	0.385516	-20.3919	3.08385	-3.08385	5.78215e-05	-20.2607	3.03422	-3.03422	0.000104591
SUT815	NA	-19.5957	-3.31632	3.31632	3.54172e-05	-18.312	0.968054	-0.968054	0.0197002	-17.9596	0.509766	-0.509766	0.204422	-20.0286	2.33646	-2.33646	0.00110031	-19.638	2.80568	-2.80568	2.71759e-05
SUT816	NA	-19.8365	-0.0777109	0.0777109	1	-19.3906	-0.590984	0.590984	0.191586	-19.3619	-0.401912	0.401912	0.376044	-19.4882	0.660152	-0.660152	0.353964	-19.4202	0.484326	-0.484326	0.463253
SUT817	NA	-20.3395	-2.47265	2.47265	0.00505664	-19.0974	0.20008	-0.20008	0.704533	-18.9	0.051784	-0.051784	0.920146	-20.3915	2.25446	-2.25446	0.00422864	-20.1544	2.41692	-2.41692	0.00102641
SUT818	ST3483	-21.7804	-1.59076	1.59076	0.187108	-21.1982	0.640898	-0.640898	0.294775	-20.9176	0.326352	-0.326352	0.608353	-22.0456	0.946348	-0.946348	0.597434	-21.733	1.25959	-1.25959	0.440392
SUT819	NA	-36.4261	-27.18	27.18	0.221984	-23.4442	1.45685	-1.45685	0.536122	-22.4157	-0.3538	0.3538	0.836404	-37.1267	25.7787	-25.7787	1	-36.1349	27.7623	-27.7623	0.0720844
SUT820	ST3493	-50.0161	0	0	1	-50.0161	0	0	1	-50.0161	0	0	1	-50.0161	0	0	1	-50.0161	0	0	1
SUT821	ST3493	-23.897	0.642304	-0.642304	0.62031	-23.0544	-2.10367	2.10367	0.0569499	-23.0977	-1.77056	1.77056	0.0848039	-22.793	1.45149	-1.45149	0.54135	-22.7985	1.12861	-1.12861	0.540282
SUT822	ST3503	-20.453	-3.07574	3.07574	0.000731612	-19.1295	0.638827	-0.638827	0.150967	-18.71	0.0464361	-0.0464361	0.952543	-20.7232	2.42119	-2.42119	0.00447351	-20.266	3.02371	-3.02371	0.000125045
SUT823	ST3511	-20.1248	-0.902089	0.902089	0.312761	-19.6218	0.0981686	-0.0981686	0.819025	-19.436	-0.0268083	0.0268083	1	-20.1231	0.791366	-0.791366	0.359216	-19.9007	0.924254	-0.924254	0.182113
SUT824	ST3511	-36.2626	-27.5069	27.5069	0.135458	-22.2736	-0.234172	0.234172	0.836258	-22.3928	0.25061	-0.25061	0.836404	-36.1207	27.7908	-27.7908	0.120799	-36.2759	27.4804	-27.4804	0.120129
SUT825	ST3511,ST3512	-21.0011	0.465201	-0.465201	0.461532	-20.8356	-0.569135	0.569135	0.326051	-20.9965	-0.000967555	0.000967555	1	-20.6613	0.100206	-0.100206	1	-20.7895	-0.468158	0.468158	0.632736
SUT826	ST3520	-23.0915	-0.968696	0.968696	0.755494	-36.2596	27.513	-27.513	0.0115593	-22.0924	-0.574739	0.574739	0.499483	-36.7674	-26.4973	26.4973	0.333333	-22.602	1.52166	-1.52166	0.282362
SUT827	NA	-22.2737	1.39574	-1.39574	0.255626	-22.7197	-0.294599	0.294599	1	-23.2163	0.945373	-0.945373	0.580827	-22.0799	-1.1224	1.1224	0.346937	-22.5345	-2.34335	2.34335	0.0254404
SUT828	ST3524	-18.9395	-0.776861	0.776861	0.272117	-18.4617	0.0296754	-0.0296754	0.977133	-17.9323	-0.782497	0.782497	0.0495048	-18.9062	0.729294	-0.729294	0.180026	-18.3375	1.5547	-1.5547	0.00207849
SUT829	ST3530	-19.6531	-3.20156	3.20156	7.04442e-05	-18.1309	0.338948	-0.338948	0.390423	-17.8216	-0.032956	0.032956	0.959628	-19.7778	2.83794	-2.83794	2.86525e-05	-19.4332	3.21544	-3.21544	6.50482e-07
SUT830	NA	-37.9011	-24.2298	24.2298	1	-37.8477	24.3368	-24.3368	1	-37.786	24.4601	-24.4601	1	-50.0161	0	0	1	-50.0161	0	0	1
SUT831	ST3532	-22.1728	-2.80594	2.80594	0.0624083	-20.5935	-0.148041	0.148041	0.847858	-20.0583	-0.9717	0.9717	0.0565146	-22.0522	2.93301	-2.93301	0.0215186	-21.4747	3.77626	-3.77626	0.000456355
SUT832	NA	-35.9821	-28.068	28.068	0.0401085	-21.6518	-0.345292	0.345292	0.621428	-21.5868	-0.22913	0.22913	0.769574	-35.7791	28.474	-28.474	0.0303834	-35.7494	28.5333	-28.5333	0.0655284
SUT833	NA	-19.5814	-2.37419	2.37419	0.00185172	-18.2953	-0.0026963	0.0026963	1	-18.3611	0.375564	-0.375564	0.366469	-19.5336	2.35556	-2.35556	0.000239339	-19.5643	1.98226	-1.98226	0.00202207
SUT834	NA	-19.2142	-2.38331	2.38331	0.00136419	-18.0593	0.266228	-0.266228	0.505141	-17.872	0.138354	-0.138354	0.740955	-19.3028	2.09211	-2.09211	0.000544314	-19.0787	2.22833	-2.22833	0.000127771
SUT835	ST3578	-22.5269	-0.0979072	0.0979072	0.784266	-23.2767	1.81789	-1.81789	0.136299	-23.1711	1.85331	-1.85331	0.124764	-23.3827	-1.72794	1.72794	0.117339	-23.2398	-1.754	1.754	0.357042
SUT836	ST3579	-20.7133	-1.72503	1.72503	0.060261	-19.9216	0.400834	-0.400834	0.501379	-19.3844	-0.427659	0.427659	0.324326	-20.857	1.32356	-1.32356	0.105795	-20.2733	2.17904	-2.17904	0.00433023
SUT837	ST3580	-19.7893	-0.929123	0.929123	0.205902	-18.9096	-0.676918	0.676918	0.145874	-19.3363	0.423827	-0.423827	0.346053	-19.4128	1.56808	-1.56808	0.0104599	-19.8067	0.468338	-0.468338	0.526858
SUT838	NA	-35.8437	-28.3447	28.3447	0.0176816	-21.4066	-0.290217	0.290217	0.666414	-21.5685	0.279801	-0.279801	0.666841	-35.6715	28.6891	-28.6891	0.0119756	-35.8686	28.2948	-28.2948	0.14982
SUT839	ST3582	-22.5658	-2.02006	2.02006	0.13483	-21.4865	0.0445237	-0.0445237	0.880916	-21.4829	0.284268	-0.284268	0.588619	-22.5418	1.95389	-1.95389	0.283911	-22.4999	1.72582	-1.72582	0.456405
SUT840	NA	-21.1444	-2.86291	2.86291	0.00549912	-20.066	0.891164	-0.891164	0.0911353	-19.5398	0.0856929	-0.0856929	0.883587	-21.549	1.9394	-1.9394	0.0639405	-20.9829	2.75986	-2.75986	0.00422703
SUT841	NA	-21.1874	-1.60684	1.60684	0.111851	-20.1215	-0.327175	0.327175	0.595666	-19.9954	-0.332619	0.332619	0.493815	-20.9765	1.9145	-1.9145	0.0416788	-20.82	1.91571	-1.91571	0.0190948
SUT842	NA	-18.8895	0.343368	-0.343368	0.480138	-19.313	0.727775	-0.727775	0.10712	-18.8759	0.100028	-0.100028	0.843042	-19.1989	-1.07628	1.07628	0.0259979	-18.7254	-0.441058	0.441058	0.31578
SUT843	ST3605	-20.2624	-0.626724	0.626724	0.543204	-19.7572	-0.183724	0.183724	0.710905	-19.4026	-0.646292	0.646292	0.15456	-20.1253	0.786782	-0.786782	0.309437	-19.7313	1.26298	-1.26298	0.0651868
SUT844	ST3609	-35.3118	-29.4086	29.4086	0.0029662	-20.5043	0.0015529	-0.0015529	1	-20.7798	0.799142	-0.799142	0.152311	-35.2897	29.4528	-29.4528	0.000760861	-35.605	28.8221	-28.8221	0.0214401
SUT845	ST3613	-19.7652	-0.451215	0.451215	0.586105	-19.5426	0.2105	-0.2105	0.703231	-19.5497	0.471441	-0.471441	0.330136	-19.8254	0.216791	-0.216791	0.833393	-19.7936	-0.0315555	0.0315555	0.924065
SUT846	NA	-19.4853	-0.780041	0.780041	0.327464	-18.9954	0.0136963	-0.0136963	1	-18.9431	0.155543	-0.155543	0.730429	-19.4424	0.75177	-0.75177	0.255974	-19.3499	0.624938	-0.624938	0.327447
SUT847	NA	-18.1079	-0.440051	0.440051	0.540861	-17.9708	0.394368	-0.394368	0.334748	-18.1594	1.01803	-1.01803	0.0119495	-18.252	0.037548	-0.037548	1	-18.4023	-0.574841	0.574841	0.174957
tA(AGC)D	tRNA-Ala%20(Ala1)%2C%20one%20of%2011%20nuclear%20tRNA%20genes%20containing%20the%20tDNA-anticodon%20AGC%20(converted%20to%20IGC%20in%20the%20mature%20tRNA)%2C%20decodes%20GCU%20and%20GCC%20codons%20into%20alanine%2C%20one%20of%2016%20nuclear%20tRNAs%20for%20alanine	-38.6368	-22.7586	22.7586	1	-26.1605	-1.97256	1.97256	1	-27.5818	1.11665	-1.11665	1	-37.6273	24.7775	-24.7775	1	-39.0879	21.8562	-21.8562	1
tA(AGC)F	tRNA-Ala%20(Ala1)%2C%20one%20of%2011%20nuclear%20tRNA%20genes%20containing%20the%20tDNA-anticodon%20AGC%20(converted%20to%20IGC%20in%20the%20mature%20tRNA)%2C%20decodes%20GCU%20and%20GCC%20codons%20into%20alanine%2C%20one%20of%2016%20nuclear%20tRNAs%20for%20alanine	-38.6368	-22.7586	22.7586	1	-26.1605	-1.97256	1.97256	1	-27.5818	1.11665	-1.11665	1	-37.6273	24.7775	-24.7775	1	-39.0879	21.8562	-21.8562	1
tA(AGC)G	tRNA-Ala%20(Ala1)%2C%20one%20of%2011%20nuclear%20tRNA%20genes%20containing%20the%20tDNA-anticodon%20AGC%20(converted%20to%20IGC%20in%20the%20mature%20tRNA)%2C%20decodes%20GCU%20and%20GCC%20codons%20into%20alanine%2C%20one%20of%2016%20nuclear%20tRNAs%20for%20alanine	-38.6368	-22.7586	22.7586	1	-26.1605	-1.97256	1.97256	1	-27.5818	1.11665	-1.11665	1	-37.6273	24.7775	-24.7775	1	-39.0879	21.8562	-21.8562	1
tA(AGC)H	tRNA-Ala%20(Ala1)%2C%20one%20of%2011%20nuclear%20tRNA%20genes%20containing%20the%20tDNA-anticodon%20AGC%20(converted%20to%20IGC%20in%20the%20mature%20tRNA)%2C%20decodes%20GCU%20and%20GCC%20codons%20into%20alanine%2C%20one%20of%2016%20nuclear%20tRNAs%20for%20alanine	-38.6368	-22.7586	22.7586	1	-26.1605	-1.97256	1.97256	1	-27.5818	1.11665	-1.11665	1	-37.6273	24.7775	-24.7775	1	-39.0879	21.8562	-21.8562	1
tA(AGC)J	tRNA-Ala%20(Ala1)%2C%20one%20of%2011%20nuclear%20tRNA%20genes%20containing%20the%20tDNA-anticodon%20AGC%20(converted%20to%20IGC%20in%20the%20mature%20tRNA)%2C%20decodes%20GCU%20and%20GCC%20codons%20into%20alanine%2C%20one%20of%2016%20nuclear%20tRNAs%20for%20alanine	-38.6368	-22.7586	22.7586	1	-26.1605	-1.97256	1.97256	1	-27.5818	1.11665	-1.11665	1	-37.6273	24.7775	-24.7775	1	-39.0879	21.8562	-21.8562	1
tA(AGC)K1	tRNA-Ala%20(Ala1)%2C%20one%20of%2011%20nuclear%20tRNA%20genes%20containing%20the%20tDNA-anticodon%20AGC%20(converted%20to%20IGC%20in%20the%20mature%20tRNA)%2C%20decodes%20GCU%20and%20GCC%20codons%20into%20alanine%2C%20one%20of%2016%20nuclear%20tRNAs%20for%20alanine	-38.6368	-22.7586	22.7586	1	-26.1605	-1.97256	1.97256	1	-27.5818	1.11665	-1.11665	1	-37.6273	24.7775	-24.7775	1	-39.0879	21.8562	-21.8562	1
tA(AGC)K2	tRNA-Ala%20(Ala1)%2C%20one%20of%2011%20nuclear%20tRNA%20genes%20containing%20the%20tDNA-anticodon%20AGC%20(converted%20to%20IGC%20in%20the%20mature%20tRNA)%2C%20decodes%20GCU%20and%20GCC%20codons%20into%20alanine%2C%20one%20of%2016%20nuclear%20tRNAs%20for%20alanine	-38.6368	-22.7586	22.7586	1	-26.1605	-1.97256	1.97256	1	-27.5818	1.11665	-1.11665	1	-37.6273	24.7775	-24.7775	1	-39.0879	21.8562	-21.8562	1
tA(AGC)L	tRNA-Ala%20(Ala1)%2C%20one%20of%2011%20nuclear%20tRNA%20genes%20containing%20the%20tDNA-anticodon%20AGC%20(converted%20to%20IGC%20in%20the%20mature%20tRNA)%2C%20decodes%20GCU%20and%20GCC%20codons%20into%20alanine%2C%20one%20of%2016%20nuclear%20tRNAs%20for%20alanine	-38.6368	-22.7586	22.7586	1	-26.1605	-1.97256	1.97256	1	-27.5818	1.11665	-1.11665	1	-37.6273	24.7775	-24.7775	1	-39.0879	21.8562	-21.8562	1
tA(AGC)M1	tRNA-Ala%20(Ala1)%2C%20one%20of%2011%20nuclear%20tRNA%20genes%20containing%20the%20tDNA-anticodon%20AGC%20(converted%20to%20IGC%20in%20the%20mature%20tRNA)%2C%20decodes%20GCU%20and%20GCC%20codons%20into%20alanine%2C%20one%20of%2016%20nuclear%20tRNAs%20for%20alanine	-38.6368	-22.7586	22.7586	1	-26.1605	-1.97256	1.97256	1	-27.5818	1.11665	-1.11665	1	-37.6273	24.7775	-24.7775	1	-39.0879	21.8562	-21.8562	1
tA(AGC)M2	tRNA-Ala%20(Ala1)%2C%20one%20of%2011%20nuclear%20tRNA%20genes%20containing%20the%20tDNA-anticodon%20AGC%20(converted%20to%20IGC%20in%20the%20mature%20tRNA)%2C%20decodes%20GCU%20and%20GCC%20codons%20into%20alanine%2C%20one%20of%2016%20nuclear%20tRNAs%20for%20alanine	-38.6368	-22.7586	22.7586	1	-26.1605	-1.97256	1.97256	1	-27.5818	1.11665	-1.11665	1	-37.6273	24.7775	-24.7775	1	-39.0879	21.8562	-21.8562	1
tA(AGC)P	tRNA-Ala%20(Ala1)%2C%20one%20of%2011%20nuclear%20tRNA%20genes%20containing%20the%20tDNA-anticodon%20AGC%20(converted%20to%20IGC%20in%20the%20mature%20tRNA)%2C%20decodes%20GCU%20and%20GCC%20codons%20into%20alanine%2C%20one%20of%2016%20nuclear%20tRNAs%20for%20alanine	-38.6368	-22.7586	22.7586	1	-26.1605	-1.97256	1.97256	1	-27.5818	1.11665	-1.11665	1	-37.6273	24.7775	-24.7775	1	-39.0879	21.8562	-21.8562	1
tA(UGC)A	tRNA-Ala%20(Ala2)%2C%20one%20of%205%20nuclear%20tRNA%20genes%20containing%20the%20tDNA-anticodon%20TGC%20(mature%20tRNA%20may%20be%20UGC%20or%20may%20contain%20modified%20bases)%2C%20decodes%20GCA%20and%20probably%20GCG%20codons%20into%20alanine%2C%20one%20of%2016%20nuclear%20tRNAs%20for%20alanine	-25.0969	0.398286	-0.398286	0.54969	-25.0504	-0.280221	0.280221	1	-25.3716	0.60883	-0.60883	1	-24.9078	-0.134228	0.134228	0.552398	-25.191	-1.01243	1.01243	0.552522
tA(UGC)E	tRNA-Ala%20(Ala2)%2C%20one%20of%205%20nuclear%20tRNA%20genes%20containing%20the%20tDNA-anticodon%20TGC%20(mature%20tRNA%20may%20be%20UGC%20or%20may%20contain%20modified%20bases)%2C%20decodes%20GCA%20and%20probably%20GCG%20codons%20into%20alanine%2C%20one%20of%2016%20nuclear%20tRNAs%20for%20alanine	-25.0969	0.398286	-0.398286	0.54969	-25.0504	-0.280221	0.280221	1	-25.3716	0.60883	-0.60883	1	-24.9078	-0.134228	0.134228	0.552398	-25.191	-1.01243	1.01243	0.552522
tA(UGC)G	tRNA-Ala%20(Ala2)%2C%20one%20of%205%20nuclear%20tRNA%20genes%20containing%20the%20tDNA-anticodon%20TGC%20(mature%20tRNA%20may%20be%20UGC%20or%20may%20contain%20modified%20bases)%2C%20decodes%20GCA%20and%20probably%20GCG%20codons%20into%20alanine%2C%20one%20of%2016%20nuclear%20tRNAs%20for%20alanine	-25.0969	0.398286	-0.398286	0.54969	-25.0504	-0.280221	0.280221	1	-25.3716	0.60883	-0.60883	1	-24.9078	-0.134228	0.134228	0.552398	-25.191	-1.01243	1.01243	0.552522
tA(UGC)L	tRNA-Ala%20(Ala2)%2C%20one%20of%205%20nuclear%20tRNA%20genes%20containing%20the%20tDNA-anticodon%20TGC%20(mature%20tRNA%20may%20be%20UGC%20or%20may%20contain%20modified%20bases)%2C%20decodes%20GCA%20and%20probably%20GCG%20codons%20into%20alanine%2C%20one%20of%2016%20nuclear%20tRNAs%20for%20alanine	-25.0969	0.398286	-0.398286	0.54969	-25.0504	-0.280221	0.280221	1	-25.3716	0.60883	-0.60883	1	-24.9078	-0.134228	0.134228	0.552398	-25.191	-1.01243	1.01243	0.552522
tA(UGC)O	tRNA-Ala%20(Ala2)%2C%20one%20of%205%20nuclear%20tRNA%20genes%20containing%20the%20tDNA-anticodon%20TGC%20(mature%20tRNA%20may%20be%20UGC%20or%20may%20contain%20modified%20bases)%2C%20decodes%20GCA%20and%20probably%20GCG%20codons%20into%20alanine%2C%20one%20of%2016%20nuclear%20tRNAs%20for%20alanine	-25.0969	0.398286	-0.398286	0.54969	-25.0504	-0.280221	0.280221	1	-25.3716	0.60883	-0.60883	1	-24.9078	-0.134228	0.134228	0.552398	-25.191	-1.01243	1.01243	0.552522
tA(UGC)Q	tRNA-Ala	-21.7435	1.95017	-1.95017	0.0562174	-23.8988	2.53597	-2.53597	0.136299	-23.6	2.18556	-2.18556	0.0884454	-22.9723	-4.52192	4.52192	0.000785396	-22.6321	-4.15324	4.15324	0.000336796
tC(GCA)B	tRNA-Cys	-24.8994	-1.35282	1.35282	1	-25.1419	2.06442	-2.06442	1	-24.1761	0.379336	-0.379336	1	-25.8786	-0.719703	0.719703	1	-24.873	0.97953	-0.97953	1
tC(GCA)G	tRNA-Cys	-24.8994	-1.35282	1.35282	1	-25.1419	2.06442	-2.06442	1	-24.1761	0.379336	-0.379336	1	-25.8786	-0.719703	0.719703	1	-24.873	0.97953	-0.97953	1
tC(GCA)P1	tRNA-Cys	-24.8994	-1.35282	1.35282	1	-25.1419	2.06442	-2.06442	1	-24.1761	0.379336	-0.379336	1	-25.8786	-0.719703	0.719703	1	-24.873	0.97953	-0.97953	1
tC(GCA)P2	tRNA-Cys	-24.8994	-1.35282	1.35282	1	-25.1419	2.06442	-2.06442	1	-24.1761	0.379336	-0.379336	1	-25.8786	-0.719703	0.719703	1	-24.873	0.97953	-0.97953	1
tC(GCA)Q	tRNA-Cys	-19.8428	0.347723	-0.347723	0.541943	-20.3637	0.868995	-0.868995	0.099439	-20.0535	0.495733	-0.495733	0.264855	-20.2354	-1.24719	1.24719	0.0444557	-19.8817	-0.851653	0.851653	0.103049
tD(GUC)B	tRNA-Asp	-21.2883	0.783015	-0.783015	0.309897	-21.7717	0.406624	-0.406624	0.735889	-21.8624	0.834536	-0.834536	0.195271	-21.4416	-1.20369	1.20369	0.229923	-21.4864	-1.60524	1.60524	0.0586684
tD(GUC)D	tRNA-Asp	-21.2883	0.783015	-0.783015	0.309897	-21.7717	0.406624	-0.406624	0.735889	-21.8624	0.834536	-0.834536	0.195271	-21.4416	-1.20369	1.20369	0.229923	-21.4864	-1.60524	1.60524	0.0586684
tD(GUC)G1	tRNA-Asp	-21.2883	0.783015	-0.783015	0.309897	-21.7717	0.406624	-0.406624	0.735889	-21.8624	0.834536	-0.834536	0.195271	-21.4416	-1.20369	1.20369	0.229923	-21.4864	-1.60524	1.60524	0.0586684
tD(GUC)G2	tRNA-Asp	-21.2883	0.783015	-0.783015	0.309897	-21.7717	0.406624	-0.406624	0.735889	-21.8624	0.834536	-0.834536	0.195271	-21.4416	-1.20369	1.20369	0.229923	-21.4864	-1.60524	1.60524	0.0586684
tD(GUC)I1	tRNA-Asp	-21.2883	0.783015	-0.783015	0.309897	-21.7717	0.406624	-0.406624	0.735889	-21.8624	0.834536	-0.834536	0.195271	-21.4416	-1.20369	1.20369	0.229923	-21.4864	-1.60524	1.60524	0.0586684
tD(GUC)I2	tRNA-Asp	-21.2819	0.770164	-0.770164	0.309897	-21.7652	0.419667	-0.419667	0.735889	-21.8559	0.847576	-0.847576	0.195271	-21.4416	-1.20369	1.20369	0.229923	-21.4864	-1.60524	1.60524	0.0586684
tD(GUC)J1	tRNA-Asp	-21.2819	0.770164	-0.770164	0.309897	-21.7652	0.419667	-0.419667	0.735889	-21.8559	0.847576	-0.847576	0.195271	-21.4416	-1.20369	1.20369	0.229923	-21.4864	-1.60524	1.60524	0.0586684
tD(GUC)J2	tRNA-Asp	-21.2883	0.783015	-0.783015	0.309897	-21.7717	0.406624	-0.406624	0.735889	-21.8624	0.834536	-0.834536	0.195271	-21.4416	-1.20369	1.20369	0.229923	-21.4864	-1.60524	1.60524	0.0586684
tD(GUC)J3	tRNA-Asp	-21.2883	0.783015	-0.783015	0.309897	-21.7717	0.406624	-0.406624	0.735889	-21.8624	0.834536	-0.834536	0.195271	-21.4416	-1.20369	1.20369	0.229923	-21.4864	-1.60524	1.60524	0.0586684
tD(GUC)J4	tRNA-Asp	-21.2819	0.770164	-0.770164	0.309897	-21.7652	0.419667	-0.419667	0.735889	-21.8559	0.847576	-0.847576	0.195271	-21.4416	-1.20369	1.20369	0.229923	-21.4864	-1.60524	1.60524	0.0586684
tD(GUC)K	tRNA-Asp	-21.2883	0.783015	-0.783015	0.309897	-21.7717	0.406624	-0.406624	0.735889	-21.8624	0.834536	-0.834536	0.195271	-21.4416	-1.20369	1.20369	0.229923	-21.4864	-1.60524	1.60524	0.0586684
tD(GUC)L1	tRNA-Asp	-21.2819	0.770164	-0.770164	0.309897	-21.7652	0.419667	-0.419667	0.735889	-21.8559	0.847576	-0.847576	0.195271	-21.4416	-1.20369	1.20369	0.229923	-21.4864	-1.60524	1.60524	0.0586684
tD(GUC)L2	tRNA-Asp	-21.2819	0.770164	-0.770164	0.309897	-21.7652	0.419667	-0.419667	0.735889	-21.8559	0.847576	-0.847576	0.195271	-21.4416	-1.20369	1.20369	0.229923	-21.4864	-1.60524	1.60524	0.0586684
tD(GUC)M	tRNA-Asp	-21.2883	0.783015	-0.783015	0.309897	-21.7717	0.406624	-0.406624	0.735889	-21.8624	0.834536	-0.834536	0.195271	-21.4416	-1.20369	1.20369	0.229923	-21.4864	-1.60524	1.60524	0.0586684
tD(GUC)N	tRNA-Asp	-23.2591	-0.819628	0.819628	1	-22.6705	-0.130629	0.130629	1	-22.4307	-0.363908	0.363908	0.836404	-23.1447	0.934387	-0.934387	0.684264	-22.8554	1.20104	-1.20104	0.540282
tD(GUC)O	tRNA-Asp	-21.2819	0.770164	-0.770164	0.309897	-21.7652	0.419667	-0.419667	0.735889	-21.8559	0.847576	-0.847576	0.195271	-21.4416	-1.20369	1.20369	0.229923	-21.4864	-1.60524	1.60524	0.0586684
tD(GUC)Q	tRNA-Asp	-17.3646	-2.24746	2.24746	0.000401031	-16.3753	0.467654	-0.467654	0.216707	-16.1559	0.275396	-0.275396	0.455211	-17.553	1.75651	-1.75651	0.000226229	-17.294	1.96262	-1.96262	2.44821e-05
tE(CUC)D	tRNA-Glu	-18.9672	0.468351	-0.468351	0.374	-18.8663	-0.473542	0.473542	0.271716	-18.915	-0.129318	0.129318	0.813461	-18.6864	-0.0208072	0.0208072	0.906221	-18.6945	-0.348872	0.348872	0.415151
tE(CUC)I	tRNA-Glu	-18.9672	0.468351	-0.468351	0.374	-18.8663	-0.473542	0.473542	0.271716	-18.915	-0.129318	0.129318	0.813461	-18.6864	-0.0208072	0.0208072	0.906221	-18.6945	-0.348872	0.348872	0.415151
tE(UUC)B	tRNA-Glu%3B%20thiolation%20of%20uridine%20at%20wobble%20position%20(34)%20requires%20Ncs6p	-16.5659	-1.04972	1.04972	0.0771657	-15.9884	0.0859657	-0.0859657	0.829637	-16.0355	0.426839	-0.426839	0.249307	-16.5655	0.936298	-0.936298	0.0297312	-16.5728	0.609881	-0.609881	0.15856
tE(UUC)C	tRNA-Glu%3B%20thiolation%20of%20uridine%20at%20wobble%20position%20(34)%20requires%20Ncs6p	-16.5659	-1.04972	1.04972	0.0771657	-15.9884	0.0859657	-0.0859657	0.829637	-16.0355	0.426839	-0.426839	0.249307	-16.5655	0.936298	-0.936298	0.0297312	-16.5728	0.609881	-0.609881	0.15856
tE(UUC)E1	tRNA-Glu%3B%20thiolation%20of%20uridine%20at%20wobble%20position%20(34)%20requires%20Ncs6p%3B%20target%20of%20K.%20lactis%20zymocin	-16.5659	-1.04972	1.04972	0.0771657	-15.9884	0.0859657	-0.0859657	0.829637	-16.0355	0.426839	-0.426839	0.249307	-16.5655	0.936298	-0.936298	0.0297312	-16.5728	0.609881	-0.609881	0.15856
tE(UUC)E2	tRNA-Glu%3B%20thiolation%20of%20uridine%20at%20wobble%20position%20(34)%20requires%20Ncs6p	-16.5659	-1.04972	1.04972	0.0771657	-15.9884	0.0859657	-0.0859657	0.829637	-16.0355	0.426839	-0.426839	0.249307	-16.5655	0.936298	-0.936298	0.0297312	-16.5728	0.609881	-0.609881	0.15856
tE(UUC)E3	tRNA-Glu%3B%20thiolation%20of%20uridine%20at%20wobble%20position%20(34)%20requires%20Ncs6p%3B%20target%20of%20K.%20lactis%20zymocin	-16.5659	-1.04972	1.04972	0.0771657	-15.9884	0.0859657	-0.0859657	0.829637	-16.0355	0.426839	-0.426839	0.249307	-16.5655	0.936298	-0.936298	0.0297312	-16.5728	0.609881	-0.609881	0.15856
tE(UUC)G1	SOE1	-16.5657	-1.05002	1.05002	0.0771657	-15.9882	0.0862834	-0.0862834	0.825345	-16.0354	0.427156	-0.427156	0.249307	-16.5655	0.936298	-0.936298	0.0297312	-16.5728	0.609881	-0.609881	0.15856
tE(UUC)G2	tRNA-Glu%3B%20thiolation%20of%20uridine%20at%20wobble%20position%20(34)%20requires%20Ncs6p	-16.2448	-1.69198	1.69198	0.00455793	-15.6687	0.725367	-0.725367	0.0522915	-15.7158	1.06624	-1.06624	0.00425439	-16.5655	0.936298	-0.936298	0.0297312	-16.5728	0.609881	-0.609881	0.15856
tE(UUC)G3	tRNA-Glu%3B%20thiolation%20of%20uridine%20at%20wobble%20position%20(34)%20requires%20Ncs6p%3B%20target%20of%20K.%20lactis%20zymocin	-16.5659	-1.04972	1.04972	0.0771657	-15.9884	0.0859657	-0.0859657	0.829637	-16.0355	0.426839	-0.426839	0.249307	-16.5655	0.936298	-0.936298	0.0297312	-16.5728	0.609881	-0.609881	0.15856
tE(UUC)I	tRNA-Glu%3B%20thiolation%20of%20uridine%20at%20wobble%20position%20(34)%20requires%20Ncs6p	-16.5659	-1.04972	1.04972	0.0771657	-15.9884	0.0859657	-0.0859657	0.829637	-16.0355	0.426839	-0.426839	0.249307	-16.5655	0.936298	-0.936298	0.0297312	-16.5728	0.609881	-0.609881	0.15856
tE(UUC)J	tRNA-Glu%3B%20thiolation%20of%20uridine%20at%20wobble%20position%20(34)%20requires%20Ncs6p%3B%20target%20of%20K.%20lactis%20zymocin	-16.5659	-1.04972	1.04972	0.0771657	-15.9884	0.0859657	-0.0859657	0.829637	-16.0355	0.426839	-0.426839	0.249307	-16.5655	0.936298	-0.936298	0.0297312	-16.5728	0.609881	-0.609881	0.15856
[truncated: 7,016 more rows]
