# Supplementary material
Source: HighWire-hosted journal article supplement (doi:10.1101/rna.033431.112)
Supplement: Supplementary_Table_Legends.docx [file Supplementary_Table_Legends.docx]

*Supplementary Table Legends*

Supplementary Table 1. Relative sensitivities of strains to various growth conditions. Strains with the indicated genotypes were spotted on petri plates containing the indicated types of media under the indicated conditions or supplemented with various compounds at the indicated concentrations. Plates were incubated for 3-5 days at 30oC, unless otherwise indicated. Growth is scored as; -, no growth; +, least growth; ++++ most growth, as compared to growth on YPD at 30° C.

Supplementary Table 2. Comparison of different classes of RNAs detected by RNA-seq from wild type and *rrp6*- cells. Each sheet lists the log-abundance ratio (i.e. fold change) for each RNA in the two groups being compared (*rrp6*-/wt) in log base 2. The p-value is the exact value for differential expression calculated using the Negative Binomial model.

Supplementary Table 3. Comparison of snRNAs detected by RNA-seq from pairs of strains. The table lists the log-abundance ratio (i.e. fold change) for each snRNA whose p-value is less than 0.05. The p-value is the exact value for differential expression calculated using the Negative Binomial model.

Supplementary Table 4. Gene Ontology (GO) analysis results. List of GO biological processes for strains with significant (p< 0.05) fold change differences (log2FC> 0.66). GO analysis was carried out on the amiGO server.

Supplementary Table 5. List of *Saccharomyces cerevisiae* strains used in this study.

Supplementary Table 6. Pairwise comparisons of all annotated classes of RNAs detected by RNA-seq from wild type, *rrp6*- *air1*-Δ *rrp6*-Δ and *air1*-Δ *rrp6*-Δ cells. Each sheet lists the log-abundance ratio (i.e. fold change) for each RNA in the two groups being compared in log base 2. The p-value is the exact value for differential expression calculated using the Negative Binomial model.
